# Supplementary material for: Growth differentiation factor 6 derived from mesenchymal stem/stromal cells reduces age-related functional deterioration in multiple tissues
Source: Aging (Albany NY). 2016 Jun 14;8(6):1259–69. doi: 10.18632/aging.100982 (PMC4931831; doi:10.18632/aging.100982)
Supplement: Supplementary file 2 [file aging-08-1259-s002.xlsx]

## Sheet: array
Supplementary Table 1. Microarray data of MSCs.							young MSCs			old MSCs			miR-LacZ-old MSCs			miR-17-old MSCs
chr_coord	accessions	SubTypeName	ProbeName	SystematicName	Description	GeneName	normalized	raw	fold change	normalized	raw	fold change	normalized	raw	fold change	normalized	raw	fold change
mm|chr18:65295272-65295213	gb|BG069850		A_55_P2331276	BG069850	gb|H3080G09-3 NIA Mouse 15K cDNA Clone Set Mus musculus cDNA clone H3080G09 3', mRNA sequence [BG069850]	AU020951	0.0482896	5.11898	1	0.0417301	5.17693	0.864163	0.059973	4.29301	1.24194	86.7885	5832.29	1797.25
mm|chr2:25349323-25349264	ref|NM_029958|ens|ENSMUST00000028312|gb|BC111100|gb|AY299493		A_55_P2135149	NM_029958	ref|Mus musculus lipocalin 12 (Lcn12), mRNA [NM_029958]	Lcn12	0.053176	5.63696	1	0.114102	14.1552	2.14574	9.62808	689.2	181.061	11.4169	767.226	214.699
mm|chr19:20767612-20767553	ref|NM_011921|ens|ENSMUST00000025656|gb|U96401|gb|BC032880		A_51_P383399	NM_011921	ref|Mus musculus aldehyde dehydrogenase family 1, subfamily A7 (Aldh1a7), mRNA [NM_011921]	Aldh1a7	0.0573768	6.08227	1	5.13851	637.469	89.5572	14.2034	1016.71	247.546	9.59873	645.045	167.293
mm|chr7:93867783-93867724	ref|NM_016770|ref|NM_001159706|gb|AK002920|tc|TC1585449		A_55_P1963154	NM_016770	ref|Mus musculus folate hydrolase (Folh1), transcript variant 1, mRNA [NM_016770]	Folh1	0.0507311	5.37779	1	0.419122	51.9952	8.26164	6.19407	443.385	122.096	8.14904	547.624	160.632
mm|chr11:88826082-88826023	ref|NR_003564|gb|BC099439|ens|ENSMUST00000061938|ens|ENSMUST00000121228		A_55_P2061371	NR_003564	ref|Mus musculus predicted gene 15698 (Gm15698), non-coding RNA [NR_003564]	Gm15698	0.154689	16.3979	1	0.712619	88.4055	4.6068	10.1954	729.808	65.9091	18.6262	1251.7	120.411
mm|chr1:164884111-164884052	ref|NM_008030|ens|ENSMUST00000028010|gb|AK149440|gb|U87147		A_51_P269404	NM_008030	ref|Mus musculus flavin containing monooxygenase 3 (Fmo3), mRNA [NM_008030]	Fmo3	0.0488244	5.17566	1	0.735065	91.1901	15.0553	6.92825	495.94	141.901	5.52903	371.557	113.243
mm|chr3:144460568-144460509	ref|NM_030601|ens|ENSMUST00000029929|gb|AF115852|gb|AK134192		A_51_P265806	NM_030601	ref|Mus musculus chloride channel calcium activated 2 (Clca2), mRNA [NM_030601]	Clca2	0.0452756	4.79947	1	1.15468	143.246	25.5033	6.52005	466.72	144.008	4.79022	321.908	105.801
mm|chr5:126268318-126268377	ref|NM_001190352|ens|ENSMUST00000048667|tc|TC1661387|nap|NAP030720-1		A_55_P2035792	NM_001190352	ref|Mus musculus transmembrane protein 132B (Tmem132b), mRNA [NM_001190352]	Tmem132b	0.0457051	4.845	1	0.04005	4.9685	0.876271	0.0567179	4.06	1.24096	4.74737	319.029	103.87
mm|chr1:164806886-164806827	ref|NM_018881|ens|ENSMUST00000111510|gb|AF184981|gb|BC031415		A_51_P301998	NM_018881	ref|Mus musculus flavin containing monooxygenase 2 (Fmo2), mRNA [NM_018881]	Fmo2	0.115941	12.2904	1	0.82372	102.188	7.10467	11.3955	815.714	98.2871	10.9539	736.117	94.4788
mm|chr19:13553834-13553775	ref|NM_146301|ref|NM_146690|ens|ENSMUST00000080801|ens|ENSMUST00000077501		A_55_P1976052	NM_146301	ref|Mus musculus olfactory receptor 1475 (Olfr1475), mRNA [NM_146301]	Olfr1475	0.0443697	4.70344	1	0.039369	4.88401	0.887295	0.0546018	3.90852	1.23061	3.70257	248.817	83.4483
mm|chr11:18483632-18483691			A_30_P01021181	chr11:18479852-18485704_F	lincRNA:chr11:18479852-18485704 forward strand	chr11:18479852-18485704_F	0.0445691	4.72458	1	0.0398523	4.94397	0.89417	3.33444	238.686	74.815	3.70653	249.083	83.1637
mm|chr3:144393509-144393450	ref|NM_009899|ens|ENSMUST00000059091|ens|ENSMUST00000029932|gb|AK087213		A_55_P1982291	NM_009899	ref|Mus musculus chloride channel calcium activated 1 (Clca1), mRNA [NM_009899]	Clca1	0.112502	11.9259	1	1.76665	219.166	15.7032	10.2118	730.984	90.7696	9.19924	618.199	81.7693
mm|chr7:140798963-140799022	tc|TC1770678		A_55_P1990076	TC1770678	Unknown	TC1770678	0.0496274	5.26079	1	0.0431465	5.35264	0.869408	0.0596894	4.2727	1.20275	3.64749	245.115	73.4975
mm|chr12:105632110-105632169	ref|NM_009253|ens|ENSMUST00000168797|gb|BC053337|gb|BC011158		A_55_P2161410	NM_009253	ref|Mus musculus serine (or cysteine) peptidase inhibitor, clade A, member 3M (Serpina3m), mRNA [NM_009253]	Serpina3m	0.0434282	4.60363	1	0.0448884	5.56873	1.03362	1.94412	139.165	44.7664	3.16528	212.71	72.8855
mm|chr15:41486315-41486256			A_30_P01027728	chr15:41486232-41499767_R	lincRNA:chr15:41486232-41499767 reverse strand	chr15:41486232-41499767_R	0.0438843	4.65198	1	0.0382876	4.74985	0.872467	0.0614502	4.39874	1.40028	3.08214	207.123	70.2334
unmapped	nap|NAP030898-1|nap|NAP111224-1|nap|NAP113315-1		A_52_P578027	NAP030898-1	Unknown	NAP030898-1	0.0525279	5.56826	1	0.0454146	5.63401	0.864581	0.0626208	4.48254	1.19214	3.50429	235.492	66.713
mm|chr2:158154142-158157684	ref|NM_008489|ens|ENSMUST00000016168|gb|X99347|gb|BC004795		A_51_P454008	NM_008489	ref|Mus musculus lipopolysaccharide binding protein (Lbp), mRNA [NM_008489]	Lbp	0.506592	53.7016	1	2.26221	280.644	4.46555	22.2713	1594.23	43.963	32.5501	2187.41	64.2532
mm|chr4:124202880-124202821			A_55_P2010686	A_55_P2010686	Unknown	A_55_P2010686	0.0418067	4.43175	1	0.0375992	4.66445	0.899357	0.102143	7.31159	2.44321	2.67188	179.553	63.9104
mm|chr13:15873574-15873515	ref|NR_045507|gb|AK016796|riken|4933412O06|nap|NAP073473-1		A_55_P2292470	NR_045507	ref|Mus musculus RIKEN cDNA 4933412O06 gene (4933412O06Rik), non-coding RNA [NR_045507]	4933412O06Rik	0.0405198	4.29533	1	0.0351689	4.36296	0.867944	0.0903764	6.46935	2.23042	2.57511	173.051	63.5519
mm|chr12:109619775-109619834			A_30_P01021689	chr12:109619407-109619843_F	lincRNA:chr12:109619407-109619843 forward strand	chr12:109619407-109619843_F	0.054563	5.78399	1	0.0466362	5.78556	0.854722	0.063855	4.57088	1.1703	3.41477	229.476	62.5839
mm|chr9:19281804-19281745	ref|NM_146523|ens|ENSMUST00000077347|gb|BC113136|tc|TC1599813		A_55_P2111118	NM_146523	ref|Mus musculus olfactory receptor 850 (Olfr850), mRNA [NM_146523]	Olfr850	0.0404682	4.28986	1	0.0351257	4.3576	0.867984	0.049743	3.56072	1.22919	2.43288	163.492	60.1183
mm|chr14:32075678-32075619	ref|NM_001033668|ens|ENSMUST00000048603|ens|ENSMUST00000170417|gb|AK052631		A_55_P2277970	NM_001033668	ref|Mus musculus dynein, axonemal, heavy chain 1 (Dnahc1), mRNA [NM_001033668]	Dnahc1	0.05448	5.77519	1	0.0465829	5.77895	0.855046	0.0637996	4.56692	1.17106	3.17668	213.476	58.309
mm|chr5:109156303-109156362			A_30_P01027414	chr5:109156118-109156422_F	lincRNA:chr5:109156118-109156422 forward strand	chr5:109156118-109156422_F	0.0415238	4.40176	1	0.0358381	4.44598	0.863074	0.0742549	5.31533	1.78825	2.36949	159.232	57.0634
mm|chr14:32963358-32963417	ref|NM_020597|ens|ENSMUST00000022464|gb|BC140208|gb|BC141601		A_52_P125636	NM_020597	ref|Mus musculus beta-microseminoprotein (Msmb), mRNA [NM_020597]	Msmb	0.0491439	5.20953	1	0.0430786	5.34421	0.87658	0.0619178	4.43222	1.25993	2.70461	181.753	55.0346
mm|chr5:121969463-121969404	ref|NM_172126|ens|ENSMUST00000100757|gb|AK132801|gb|U22056		A_55_P2070681	NM_172126	ref|Mus musculus a disintegrin and metallopeptidase domain 1a (Adam1a), mRNA [NM_172126]	Adam1a	0.0418195	4.43311	1	0.0363519	4.50972	0.869257	0.082836	5.92959	1.9808	2.2856	153.595	54.654
mm|chr14:65206417-65206476			A_30_P01017934	chr14:65206167-65206949_F	lincRNA:chr14:65206167-65206949 forward strand	chr14:65206167-65206949_F	0.0732923	7.7694	1	0.0387	4.80102	0.528023	0.0548364	3.92531	0.748188	3.8885	261.311	53.0547
mm|chr16:38773918-38773859	ref|NM_178924|ens|ENSMUST00000057767|gb|AK086926|gb|EU694105		A_51_P113195	NM_178924	ref|Mus musculus uroplakin 1B (Upk1b), mRNA [NM_178924]	Upk1b	0.0490706	5.20177	1	0.120727	14.977	2.46026	0.0618667	4.42856	1.26077	2.53121	170.1	51.5829
mm|chr8:74367037-74367096			A_30_P01027590	chr8:74333475-74384150_F	lincRNA:chr8:74333475-74384150 forward strand	chr8:74333475-74384150_F	0.0442909	4.69509	1	0.0392711	4.87187	0.886664	0.0544364	3.89668	1.22906	2.24354	150.768	50.6546
mm|chr5:105364914-105364855	ref|NM_030239|ens|ENSMUST00000031239|gb|AF324242|gb|BC138772		A_51_P155723	NM_030239	ref|Mus musculus ATP-binding cassette, sub-family G (WHITE), member 3 (Abcg3), mRNA [NM_030239]	Abcg3	0.0437081	4.63331	1	0.037646	4.67025	0.861304	0.0518999	3.71511	1.18742	2.17274	146.01	49.7102
mm|chrX:109415961-109416020	nap|NAP013575-001		A_55_P2084746	NAP013575-001	Unknown	NAP013575-001	0.0525666	5.57236	1	0.0454287	5.63576	0.864212	0.0626322	4.48335	1.19148	2.6004	174.749	49.4686
mm|chr14:62308035-62308094			A_30_P01026844	chr14:62263564-62308286_F	lincRNA:chr14:62263564-62308286 forward strand	chr14:62263564-62308286_F	0.0502876	5.33077	1	0.0531643	6.59542	1.05721	0.0633137	4.53214	1.25903	2.4424	164.132	48.5687
mm|chrX:83495725-83495666	ref|NM_001033492|ens|ENSMUST00000096378|ens|ENSMUST00000113969|gb|AK144342		A_55_P2065784	NM_001033492	ref|Mus musculus melanoma antigen, family B, 4 (Mageb4), mRNA [NM_001033492]	Mageb4	0.0504168	5.34447	1	0.0609348	7.55941	1.20862	0.0634611	4.54269	1.25873	2.36314	158.805	46.872
mm|chr2:75496638-75496579			A_30_P01021270	chr2:75496518-75496992_R	lincRNA:chr2:75496518-75496992 reverse strand	chr2:75496518-75496992_R	0.0436392	4.62601	1	0.0545616	6.76876	1.25029	0.051801	3.70803	1.18703	2.0223	135.901	46.3413
mm|chr13:98222221-98222162			A_30_P01033022	chr13:98221098-98480773_R	lincRNA:chr13:98221098-98480773 reverse strand	chr13:98221098-98480773_R	0.057911	6.13889	1	0.0493999	6.12842	0.853031	0.0675436	4.83492	1.16633	2.66171	178.87	45.962
mm|chr13:021533034-021532975	tc|TC1619416		A_55_P2094841	TC1619416	tc|Q5RJ54_MOUSE (Q5RJ54) Novel SCAN domain containing C2H2 type zinc finger protein, partial (64%) [TC1619416]	TC1619416	0.0672054	7.12415	1	0.109838	13.6262	1.63436	0.129202	9.24859	1.9225	3.08309	207.187	45.8756
mm|chr16:45667699-45664371	ref|NM_172455|ens|ENSMUST00000036617|ens|ENSMUST00000114562|ens|ENSMUST00000170951		A_51_P112182	NM_172455	ref|Mus musculus transmembrane serine protease 7 (Tmprss7), transcript variant 2, mRNA [NM_172455]	Tmprss7	0.0558702	5.92256	1	0.0386523	4.79509	0.691823	0.054891	3.92922	0.982473	2.5398	170.677	45.459
mm|chr3:9630711-9630770			A_30_P01026413	chr3:9628206-9631521_F	lincRNA:chr3:9628206-9631521 forward strand	chr3:9628206-9631521_F	0.0525605	5.57171	1	0.0454749	5.6415	0.865192	0.0627122	4.48908	1.19314	2.35051	157.957	44.7201
mm|chr7:113740799-113740740	ref|XM_001000891|ref|XM_001481311|ref|XM_485982|ref|XM_001478597		A_52_P431615	XM_001000891	ref|PREDICTED: Mus musculus predicted gene 1966, transcript variant 1 (Gm1966), mRNA [XM_001000891]	Gm1966	0.0447258	4.74119	1	0.149388	18.5327	3.34009	1.89122	135.378	42.2848	1.98787	133.587	44.4458
mm|chr13:119501368-119501309			A_55_P2112529	A_55_P2112529	Unknown	A_55_P2112529	0.0771323	8.17647	1	0.0441299	5.47463	0.572132	0.0632653	4.52868	0.820219	3.40708	228.96	44.1719
mm|chr11:113956514-113956573	ens|ENSMUST00000129365|gb|AK006331|tc|TC1603943|riken|1700025D23		A_55_P1992304	ENSMUST00000129365	ens|RIKEN cDNA 1700025D23 gene [Source:MGI Symbol;Acc:MGI:1916667] [ENSMUST00000129365]	ENSMUST00000129365	0.0424445	4.49936	1	0.0375191	4.65452	0.883957	0.0525545	3.76197	1.2382	1.85406	124.595	43.682
mm|chr17:34993858-34993502	ref|NM_008198|ref|NM_001142706|ens|ENSMUST00000025229|gb|M57890		A_51_P413866	NM_008198	ref|Mus musculus complement factor B (Cfb), transcript variant 1, mRNA [NM_008198]	Cfb	0.105932	11.2294	1	0.0459574	5.70135	0.433839	3.38064	241.994	31.9132	4.60312	309.334	43.4534
mm|chr3:84618105-84618046			A_30_P01029483	chr3:84617945-84618316_R	lincRNA:chr3:84617945-84618316 reverse strand	chr3:84617945-84618316_R	0.0528447	5.60184	1	0.0458877	5.6927	0.86835	0.0657619	4.70738	1.24444	2.28293	153.415	43.2007
mm|chr7:113744877-113744818	ens|ENSMUST00000098144|gb|AK171325|gb|AK156879|tc|TC1603513		A_55_P2169356	ENSMUST00000098144	ens|predicted gene 1966 [Source:MGI Symbol;Acc:MGI:3584360] [ENSMUST00000098144]	ENSMUST00000098144	0.143205	15.1806	1	0.883148	109.561	6.16701	7.04915	504.594	49.2241	6.03176	405.341	42.1197
mm|chr6:34083731-34083790	ref|NM_028886|gb|AK014976|ens|ENSMUST00000070189|tc|TC1589523		A_51_P270005	NM_028886	ref|Mus musculus leucine-rich repeats and guanylate kinase domain containing (Lrguk), mRNA [NM_028886]	Lrguk	0.0528218	5.59942	1	0.0458938	5.69346	0.868842	0.105676	7.5645	2.00061	2.21854	149.088	42.0004
mm|chr4:99325170-99325229	ref|NM_010425|ens|ENSMUST00000087285|tc|TC1590811		A_55_P2160815	NM_010425	ref|Mus musculus forkhead box D3 (Foxd3), mRNA [NM_010425]	Foxd3	0.0441302	4.67806	1	0.038656	4.79556	0.875952	0.0547379	3.91826	1.24037	1.81887	122.23	41.2159
mm|chr8:86554135-86554194	ref|NM_028877|ens|ENSMUST00000055077|gb|EF208034|tc|TC1669907		A_55_P2127934	NM_028877	ref|Mus musculus paralemmin 3 (Palm3), mRNA [NM_028877]	Palm3	0.0546667	5.79499	1	0.55067	68.3146	10.0732	2.58015	184.693	47.1979	2.24479	150.852	41.0632
mm|chr6:83621501-83621442	ref|NM_144943|ens|ENSMUST00000037882|gb|AY026050|gb|AJ302711		A_51_P110381	NM_144943	ref|Mus musculus CD207 antigen (Cd207), mRNA [NM_144943]	Cd207	0.0490098	5.19532	1	0.0429709	5.33085	0.876781	0.0617831	4.42257	1.26063	1.95357	131.282	39.8608
mm|chr13:19334939-19334998	ens|ENSMUST00000103559|ens|ENSMUST00000103563|gb|X00697|gb|M77018		A_52_P200125	ENSMUST00000103559	ens|T-cell receptor gamma, variable 3 [Source:MGI Symbol;Acc:MGI:98633] [ENSMUST00000103559]	ENSMUST00000103559	0.0483623	5.12668	1	0.0424706	5.26878	0.878175	0.0577102	4.13103	1.19329	1.91614	128.767	39.6205
mm|chr7:69526370-69526429	ref|NM_013779|ens|ENSMUST00000080403|gb|AK086725|gb|AJ243608		A_55_P2003251	NM_013779	ref|Mus musculus melanoma antigen, family L, 2 (Magel2), mRNA [NM_013779]	Magel2	0.0467095	4.95147	1	0.0508258	6.30531	1.08813	0.231307	16.5574	4.95203	1.76623	118.692	37.813
mm|chr18:46873479-46873420	ref|NM_033037|ens|ENSMUST00000035804|gb|AK011032|gb|AK004249		A_51_P489452	NM_033037	ref|Mus musculus cysteine dioxygenase 1, cytosolic (Cdo1), mRNA [NM_033037]	Cdo1	0.167108	17.7144	1	1.00642	124.854	6.02257	6.83547	489.299	40.9045	6.19291	416.17	37.0592
mm|chr8:111709475-111709534	gb|AK043413|tc|TC1625045|riken|A730093L10		A_55_P2218483	AK043413	gb|Mus musculus 7 days neonate cerebellum cDNA, RIKEN full-length enriched library, clone:A730093L10 product:unclassifiable, full insert sequence. [AK043413]	A730093L10Rik	0.0682176	7.23145	1	0.0465784	5.77839	0.682791	0.0637715	4.56491	0.934826	2.51092	168.737	36.8075
mm|chrX:045806785-045806726			A_55_P2035282	A_55_P2035282	Unknown	A_55_P2035282	0.0417392	4.42459	1	0.0653835	8.1113	1.56648	0.0499944	3.57871	1.19778	1.49767	100.645	35.8816
mm|chr19:20717764-20717823	ref|NM_013467|ens|ENSMUST00000087638|gb|M74570|gb|BC044729		A_51_P334942	NM_013467	ref|Mus musculus aldehyde dehydrogenase family 1, subfamily A1 (Aldh1a1), mRNA [NM_013467]	Aldh1a1	1.38236	146.538	1	18.6976	2319.57	13.5258	53.6622	3841.26	38.8192	49.0933	3299.13	35.514
mm|chr2:71226391-71226450			A_30_P01023064	chr2:71205705-71226510_F	lincRNA:chr2:71205705-71226510 forward strand	chr2:71205705-71226510_F	0.0433917	4.59976	1	0.0357979	4.44099	0.824995	0.0494702	3.54119	1.14009	1.53874	103.405	35.4616
mm|chr14:35216855-35216914	ref|NM_153127|ens|ENSMUST00000111908|gb|AK134285|gb|AK078470		A_51_P414396	NM_153127	ref|Mus musculus multimerin 2 (Mmrn2), mRNA [NM_153127]	Mmrn2	0.0874684	9.27215	1	0.0610322	7.57149	0.697762	0.0811922	5.81192	0.928246	2.97835	200.148	34.0506
mm|chr12:105651918-105651977	ref|NM_009252|ens|ENSMUST00000021506|gb|M64086|gb|BC013651		A_51_P159453	NM_009252	ref|Mus musculus serine (or cysteine) peptidase inhibitor, clade A, member 3N (Serpina3n), mRNA [NM_009252]	Serpina3n	0.937559	99.3866	1	0.828147	102.738	0.883302	20.5198	1468.85	21.8864	31.7234	2131.85	33.8362
mm|chr8:120282508-120282567	ref|NM_008290|ens|ENSMUST00000034304|gb|X95685|gb|AK004950		A_51_P441914	NM_008290	ref|Mus musculus hydroxysteroid (17-beta) dehydrogenase 2 (Hsd17b2), mRNA [NM_008290]	Hsd17b2	0.0424573	4.50071	1	0.137843	17.1005	3.24664	0.0525902	3.76452	1.23866	1.42819	95.9759	33.6383
mm|chr12:105385411-105385352	ref|NM_008458|ens|ENSMUST00000085050|gb|BC116724|tc|TC1589989		A_51_P157112	NM_008458	ref|Mus musculus serine (or cysteine) peptidase inhibitor, clade A, member 3C (Serpina3c), mRNA [NM_008458]	Serpina3c	0.0461843	4.8958	1	0.0410093	5.0875	0.887948	0.852905	61.0529	18.4674	1.53112	102.893	33.1524
mm|chr16:89570480-89570421	ref|NM_001113406|ens|ENSMUST00000171542|tc|TC1671591		A_55_P2017347	NM_001113406	ref|Mus musculus keratin associated protein 11-1 (Krtap11-1), mRNA [NM_001113406]	Krtap11-1	0.206286	21.8675	1	0.18581	23.0511	0.90074	4.60127	329.37	22.3053	6.83769	459.5	33.1466
mm|chr11:97506671-97506730			A_30_P01021034	chr11:97505439-97522274_F	lincRNA:chr11:97505439-97522274 forward strand	chr11:97505439-97522274_F	0.0497369	5.27239	1	0.242229	30.0503	4.87021	0.205731	14.7267	4.13638	1.62516	109.212	32.6751
mm|chr7:113300399-113300340	ref|NM_029000|ref|NM_001243039|ref|NM_001039160|ref|NM_001243040		A_55_P1996973	NM_029000	ref|Mus musculus GTPase, very large interferon inducible 1 (Gvin1), transcript variant 1, mRNA [NM_029000]	Gvin1	0.360691	38.2353	1	1.43294	177.767	3.97276	13.0936	937.273	36.3015	11.6885	785.483	32.4059
mm|chrX:75828868-75828927			A_30_P01017590	chrX:75813213-75829323_F	lincRNA:chrX:75813213-75829323 forward strand	chrX:75813213-75829323_F	0.0424009	4.49474	1	0.090887	11.2752	2.14352	0.0691959	4.9532	1.63194	1.35156	90.8265	31.8758
mm|chr7:113302491-113302432	ref|NM_029000|ref|NM_001243039|ref|NM_001039160|ref|NM_001243040		A_52_P535484	NM_029000	ref|Mus musculus GTPase, very large interferon inducible 1 (Gvin1), transcript variant 1, mRNA [NM_029000]	Gvin1	0.395537	41.9292	1	1.52241	188.866	3.84897	12.8551	920.196	32.5003	12.4077	833.81	31.3692
mm|chrX:12756877-12756818			A_30_P01032114	chrX:12755425-12772575_R	lincRNA:chrX:12755425-12772575 reverse strand	chrX:12755425-12772575_R	0.12537	13.2899	1	0.069815	8.66106	0.556873	0.0549599	3.93416	0.438383	3.93075	264.151	31.3533
mm|chr5:34077856-34078090	ref|NM_001163215|ref|NM_001205270|ref|NM_008010|ref|NM_001163217		A_65_P06147	NM_001163215	ref|Mus musculus fibroblast growth factor receptor 3 (Fgfr3), transcript variant 2, mRNA [NM_001163215]	Fgfr3	0.0897825	9.51746	1	0.042808	5.31065	0.476797	0.0877279	6.27976	0.977116	2.8017	188.278	31.2054
mm|chr16:23081700-23081759	ref|NM_023125|ref|NM_001102409|ens|ENSMUST00000115346|ens|ENSMUST00000039492		A_55_P2003414	NM_023125	ref|Mus musculus kininogen 1 (Kng1), transcript variant 2, mRNA [NM_023125]	Kng1	1.11029	117.697	1	4.41975	548.302	3.98072	27.0496	1936.27	24.3626	34.3495	2308.32	30.9374
mm|chr14:77511473-77511414			A_30_P01017953	chr14:77511189-77522852_R	lincRNA:chr14:77511189-77522852 reverse strand	chr14:77511189-77522852_R	0.0406036	4.30421	1	0.0353031	4.37961	0.869458	0.0487446	3.48925	1.2005	1.23521	83.0075	30.4212
mm|chr5:125205606-125205665			A_30_P01022968	chr5:125205454-125209470_F	lincRNA:chr5:125205454-125209470 forward strand	chr5:125205454-125209470_F	0.0419155	4.44328	1	0.0364424	4.52095	0.869425	0.0519767	3.72061	1.24004	1.27034	85.3681	30.3071
mm|chr13:56439129-56439070	gb|AK016655|gb|AV278915|riken|4933404M09|nap|NAP073412-1		A_55_P2351255	AK016655	gb|Mus musculus adult male testis cDNA, RIKEN full-length enriched library, clone:4933404M09 product:unclassifiable, full insert sequence. [AK016655]	4933404M09Rik	0.0469706	4.97915	1	0.0384857	4.77444	0.819358	0.0561725	4.02095	1.19591	1.38265	92.9154	29.4365
mm|chr7:133816716-133816657	ref|NM_133670|ens|ENSMUST00000075935|ens|ENSMUST00000106373|gb|AK002700		A_55_P2005475	NM_133670	ref|Mus musculus sulfotransferase family 1A, phenol-preferring, member 1 (Sult1a1), mRNA [NM_133670]	Sult1a1	0.113913	12.0754	1	2.00247	248.421	17.579	3.12699	223.837	27.4507	3.33348	224.014	29.2635
mm|chr19:29782737-29782796	ref|NM_029993|ens|ENSMUST00000025719|gb|BC111114|gb|AK020928		A_55_P1953402	NM_029993	ref|Mus musculus melan-A (Mlana), mRNA [NM_029993]	Mlana	0.0471973	5.00319	1	0.166232	20.6223	3.52206	1.35216	96.7905	28.649	1.37978	92.7225	29.2342
mm|chr14:66600325-66600382	ref|NM_013492|ens|ENSMUST00000022616|gb|L05670|gb|BC075668		A_55_P2017929	NM_013492	ref|Mus musculus clusterin (Clu), mRNA [NM_013492]	Clu	0.511445	54.2161	1	0.810883	100.596	1.58548	14.9681	1071.45	29.2663	14.7063	988.28	28.7544
mm|chr16:29232419-29232360	ref|NM_175650|ens|ENSMUST00000142681|ens|ENSMUST00000075806|gb|AK083121		A_52_P607195	NM_175650	ref|Mus musculus ATPase type 13A5 (Atp13a5), mRNA [NM_175650]	Atp13a5	0.0524833	5.56353	1	0.0454441	5.63767	0.865878	0.0626928	4.48769	1.19453	1.50715	101.282	28.7169
mm|chr2:180166019-180165960			A_30_P01031421	chr2:180161459-180189542_R	lincRNA:chr2:180161459-180189542 reverse strand	chr2:180161459-180189542_R	0.0476558	5.05179	1	0.0411819	5.10892	0.864153	0.0555439	3.97596	1.16552	1.33344	89.6086	27.9806
mm|chr13:120123377-120123318	ref|NM_008710|gb|AK090115|riken|G430147B22|nap|NAP099809-001		A_55_P2144280	NM_008710	ref|Mus musculus nicotinamide nucleotide transhydrogenase (Nnt), nuclear gene encoding mitochondrial protein, transcript variant 1, mRNA [NM_008710]	Nnt	0.0483434	5.12468	1	0.0417477	5.17911	0.863566	0.0600601	4.29924	1.24236	1.33925	89.9991	27.7028
mm|chr16:21805655-21805714			A_30_P01018614	chr16:21794415-21815365_F	lincRNA:chr16:21794415-21815365 forward strand	chr16:21794415-21815365_F	0.0488723	5.18074	1	0.0630066	7.81642	1.28921	0.13808	9.8841	2.82533	1.3469	90.513	27.5595
mm|chr7:17616914-17616855	ref|NM_016868|ref|NM_001162950|gb|AF416641|ens|ENSMUST00000108492		A_55_P2015541	NM_016868	ref|Mus musculus hypoxia inducible factor 3, alpha subunit (Hif3a), transcript variant 2, mRNA [NM_016868]	Hif3a	0.0466571	4.94592	1	0.135104	16.7606	2.89568	1.23297	88.259	26.4262	1.28374	86.2687	27.5143
mm|chr17:34865387-34865328	ref|NM_009780|ref|NM_011413|ens|ENSMUST00000069507|ens|ENSMUST00000173669		A_55_P2078633	NM_009780	ref|Mus musculus complement component 4B (Childo blood group) (C4b), mRNA [NM_009780]	C4b	0.264465	28.0348	1	0.245414	30.4454	0.927964	6.0988	436.566	23.0609	7.23326	486.083	27.3506
mm|chr16:003659302-003659361			A_55_P2014021	A_55_P2014021	Unknown	A_55_P2014021	0.051015	5.40788	1	0.0445667	5.52882	0.8736	0.0644545	4.6138	1.26344	1.37834	92.6261	27.0184
mm|chr5:122570987-122570928	ref|NM_183307|ens|ENSMUST00000152389|ens|ENSMUST00000058960|gb|BC118945		A_55_P1954653	NM_183307	ref|Mus musculus coiled-coil domain containing 63 (Ccdc63), mRNA [NM_183307]	Ccdc63	0.0440688	4.67154	1	0.0533608	6.6198	1.21085	0.055173	3.94941	1.25197	1.17867	79.2079	26.7461
mm|chr7:112218865-112218924	ref|NM_146758|ens|ENSMUST00000098160|gb|BC128570|tc|NP646830		A_55_P2039816	NM_146758	ref|Mus musculus olfactory receptor 678 (Olfr678), mRNA [NM_146758]	Olfr678	0.0577785	6.12485	1	0.0493594	6.12339	0.854287	0.0674383	4.82738	1.16719	1.52106	102.217	26.3258
mm|chr2:85764285-85764344	ref|NM_146584|ens|ENSMUST00000056718|tc|TC1600405|nap|NAP023872-001		A_55_P2102563	NM_146584	ref|Mus musculus olfactory receptor 1026 (Olfr1026), mRNA [NM_146584]	Olfr1026	0.0471296	4.99601	1	0.0404773	5.02151	0.858851	0.0553543	3.96239	1.17451	1.21208	81.4534	25.7181
mm|chr17:38205012-38205071	ref|NM_146487|ens|ENSMUST00000087129|gb|BC128267|nap|NAP112855-1		A_55_P2102603	NM_146487	ref|Mus musculus olfactory receptor 130 (Olfr130), mRNA [NM_146487]	Olfr130	0.047079	4.99064	1	0.0403667	5.00778	0.857424	0.0572291	4.09659	1.2156	1.18806	79.8392	25.2355
mm|chr5:88949978-88949919	ref|NM_152839|ens|ENSMUST00000087033|gb|BC006026|gb|AK078865		A_51_P150710	NM_152839	ref|Mus musculus immunoglobulin joining chain (Igj), mRNA [NM_152839]	Igj	0.0424941	4.50462	1	0.0375753	4.66149	0.884247	0.0643325	4.60507	1.51392	1.06182	71.3556	24.9875
mm|chr9:110705801-110705860	ref|NM_153099|ens|ENSMUST00000035715|gb|AK133402|gb|AB052292		A_51_P242487	NM_153099	ref|Mus musculus protease, serine, 42 (Prss42), mRNA [NM_153099]	Prss42	0.0413824	4.38677	1	0.0357243	4.43186	0.863272	1.11104	79.5309	26.8482	1.03199	69.3511	24.938
mm|chr17:21178751-21178692			A_30_P01031823	chr17:21177225-21187525_R	lincRNA:chr17:21177225-21187525 reverse strand	chr17:21177225-21187525_R	0.0655432	6.94796	1	0.0506951	6.2891	0.77346	0.0575834	4.12195	0.878557	1.62687	109.328	24.8214
mm|chr7:30842435-30842376	ref|NM_177889|ref|NM_001252519|ens|ENSMUST00000072617|ens|ENSMUST00000078563		A_55_P2069435	NM_177889	ref|Mus musculus zinc finger protein 82 (Zfp82), transcript variant 1, mRNA [NM_177889]	Zfp82	0.0505306	5.35654	1	0.0752544	9.33585	1.48928	0.0635881	4.55178	1.25841	1.24121	83.4106	24.5635
mm|chr5:136540125-136540184	ref|NM_027158|ens|ENSMUST00000006303|ens|ENSMUST00000139999|ens|ENSMUST00000122979		A_55_P2057296	NM_027158	ref|Mus musculus RIKEN cDNA 2310043J07 gene (2310043J07Rik), mRNA [NM_027158]	2310043J07Rik	0.0656257	6.9567	1	0.343624	42.629	5.23612	0.552634	39.5588	8.421	1.60713	108.001	24.4893
mm|chr13:60997469-60997410	ref|NM_007797|ref|NM_001145801|ens|ENSMUST00000021884|ens|ENSMUST00000171347		A_51_P489522	NM_007797	ref|Mus musculus cytotoxic T lymphocyte-associated protein 2 beta (Ctla2b), transcript variant 1, mRNA [NM_007797]	Ctla2b	6.84264	725.359	1	34.6501	4298.6	5.06385	154.867	11085.7	22.6326	165.426	11116.8	24.1758
mm|chrX:51046340-51046281	ref|NM_001200013|ref|XM_914306|gb|AK005953|ens|ENSMUST00000067940		A_51_P132483	NM_001200013	ref|Mus musculus RIKEN cDNA 1700013H16 gene (1700013H16Rik), mRNA [NM_001200013]	1700013H16Rik	0.0456908	4.84349	1	0.0393615	4.88308	0.861474	0.0533911	3.82185	1.16853	1.09991	73.9149	24.0728
mm|chr10:20030931-20030872	ens|ENSMUST00000092680|ref|XM_003085666|gb|AK016707|tc|TC1591607		A_55_P2030712	ENSMUST00000092680	ens|RIKEN cDNA 4933406P04 gene [Source:MGI Symbol;Acc:MGI:1921670] [ENSMUST00000092680]	4933406P04Rik	0.0457032	4.8448	1	0.0393604	4.88294	0.861217	0.109011	7.80322	2.38518	1.0966	73.6924	23.9938
mm|chr17:33686520-33687435	ref|NM_172619|ref|NR_037708|ref|NR_037707|ens|ENSMUST00000173013		A_52_P671784	NM_172619	ref|Mus musculus a disintegrin-like and metallopeptidase (reprolysin type) with thrombospondin type 1 motif, 10 (Adamts10), transcript variant 1, mRNA [NM_172619]	Adamts10	0.131157	13.9034	1	0.272592	33.8171	2.07837	0.286902	20.5371	2.18747	3.10165	208.434	23.6484
mm|chr11:48871896-48871837	ref|NM_001145164|ref|NM_011579|ens|ENSMUST00000068063|ens|ENSMUST00000046745		A_55_P2062246	NM_001145164	ref|Mus musculus T-cell specific GTPase 2 (Tgtp2), mRNA [NM_001145164]	Tgtp2	0.204223	21.6488	1	0.287149	35.6229	1.40606	8.40579	601.705	41.1599	4.82388	324.17	23.6207
mm|chr12:33827246-33827305			A_30_P01019844	chr12:33808493-33829143_F	lincRNA:chr12:33808493-33829143 forward strand	chr12:33808493-33829143_F	0.0467234	4.95295	1	0.0415143	5.15015	0.888513	0.255082	18.2593	5.4594	1.09008	73.2547	23.3305
mm|chr7:137672881-137672940	nap|NAP025521-001		A_52_P250644	NAP025521-001	Unknown	NAP025521-001	0.0513838	5.44698	1	0.044771	5.55417	0.871305	0.0602899	4.31568	1.17332	1.19861	80.548	23.3266
mm|chr1:141707474-141707415	ref|NM_001025575|ens|ENSMUST00000094489|gb|BC140337|gb|BC141634		A_52_P796840	NM_001025575	ref|Mus musculus complement factor H-related 2 (Cfhr2), mRNA [NM_001025575]	Cfhr2	0.106932	11.3354	1	0.248225	30.7941	2.32132	1.6157	115.655	15.1095	2.49006	167.334	23.2862
mm|chr13:61036193-61036134	ref|NM_007796|ref|NM_001145799|ens|ENSMUST00000021880|gb|AY034577		A_55_P1955656	NM_007796	ref|Mus musculus cytotoxic T lymphocyte-associated protein 2 alpha (Ctla2a), transcript variant 1, mRNA [NM_007796]	Ctla2a	16.577	1757.26	1	80.8632	10031.7	4.87803	348.156	24921.8	21.0023	371.949	24995.3	22.4376
mm|chr6:129725867-129725811	ref|NM_001014997|ens|ENSMUST00000095409|gb|AB121775|tc|TC1595290		A_66_P127627	NM_001014997	ref|Mus musculus predicted gene 156 (Gm156), mRNA [NM_001014997]	Gm156	0.0464026	4.91894	1	0.0434845	5.39456	0.937112	0.101199	7.24409	2.1809	1.03016	69.2278	22.2005
mm|chr7:110026518-110026577	ref|NM_147091|ens|ENSMUST00000098216|tc|NP646555|nap|NAP025047-001		A_55_P1974923	NM_147091	ref|Mus musculus olfactory receptor 568 (Olfr568), mRNA [NM_147091]	Olfr568	0.0525093	5.56629	1	0.0518303	6.42993	0.987069	0.135104	9.67107	2.57296	1.14155	76.7134	21.7399
mm|chr15:100907703-100907644			A_30_P01031364	chr15:100906946-100907748_R	lincRNA:chr15:100906946-100907748 reverse strand	chr15:100906946-100907748_R	0.0466991	4.95037	1	0.0400416	4.96746	0.857439	0.0550911	3.94354	1.1797	1.0032	67.4161	21.4822
mm|chr7:150644812-150644753	ref|NM_009876|ref|NM_001161624|ens|ENSMUST00000167912|ens|ENSMUST00000037287		A_51_P339540	NM_009876	ref|Mus musculus cyclin-dependent kinase inhibitor 1C (P57) (Cdkn1c), transcript variant 2, mRNA [NM_009876]	Cdkn1c	1.96287	208.075	1	16.4454	2040.17	8.37823	45.28	3241.24	23.0683	41.3996	2782.1	21.0914
mm|chr7:133816664-133816605	ref|NM_133670|ens|ENSMUST00000106373|gb|AK002700|gb|BC005413		A_51_P321341	NM_133670	ref|Mus musculus sulfotransferase family 1A, phenol-preferring, member 1 (Sult1a1), mRNA [NM_133670]	Sult1a1	0.171927	18.2253	1	2.3499	291.523	13.668	3.96611	283.903	23.0685	3.60338	242.151	20.9587
mm|chr12:111518792-111518851	ref|NM_172119|ens|ENSMUST00000173014|ens|ENSMUST00000097228|gb|BC106847		A_55_P2091468	NM_172119	ref|Mus musculus deiodinase, iodothyronine type III (Dio3), mRNA [NM_172119]	Dio3	0.291502	30.9009	1	0.997242	123.715	3.42104	4.33779	310.509	14.8808	6.09522	409.606	20.9097
mm|chr19:44871124-44871183	ens|ENSMUST00000004340|ens|ENSMUST00000169440|ens|ENSMUST00000172880|tc|TC1726614		A_55_P2075125	ENSMUST00000004340	ens|paired box gene 2 [Source:MGI Symbol;Acc:MGI:97486] [ENSMUST00000004340]	Pax2	0.051333	5.44159	1	0.0382666	4.74725	0.745459	0.558228	39.9592	10.8746	1.0592	71.1793	20.6339
mm|chr2:104839231-104839290	ref|NM_177600|ens|ENSMUST00000094764|ens|ENSMUST00000111114|gb|BC150667		A_52_P616492	NM_177600	ref|Mus musculus coiled-coil domain containing 73 (Ccdc73), mRNA [NM_177600]	Ccdc73	0.0405576	4.29934	1	0.0352845	4.37731	0.869987	0.0487469	3.48941	1.20192	0.827284	55.5944	20.3978
mm|chr6:68469274-68469333	ens|ENSMUST00000103325|gb|U29593|gb|U18586|gb|GU563191		A_66_P123324	ENSMUST00000103325	ens|immunoglobulin kappa chain variable 14-100 [Source:MGI Symbol;Acc:MGI:4439559] [ENSMUST00000103325]	ENSMUST00000103325	0.0404129	4.284	1	0.035084	4.35243	0.868139	0.0496719	3.55563	1.22911	0.82311	55.3139	20.3675
mm|chr3:53662792-53662733	ens|ENSMUST00000122330|tc|TC1654425		A_55_P1987822	ENSMUST00000122330	ens|ubiquitin-fold modifier 1 [Source:MGI Symbol;Acc:MGI:1915140] [ENSMUST00000122330]	Ufm1	0.042592	4.51499	1	0.0376653	4.67266	0.884329	0.0527487	3.77587	1.23847	0.866934	58.2589	20.3544
mm|chr16:81597911-81597970	ref|NM_010954|ens|ENSMUST00000037785|ens|ENSMUST00000168859|gb|AF001286		A_52_P184368	NM_010954	ref|Mus musculus neural cell adhesion molecule 2 (Ncam2), transcript variant 2, mRNA [NM_010954]	Ncam2	0.0464106	4.91978	1	0.0398089	4.93858	0.857755	0.0554555	3.96963	1.19489	0.929155	62.4403	20.0203
mm|chr6:52064075-52064134			A_30_P01026100	chr6:52046805-52072744_F	lincRNA:chr6:52046805-52072744 forward strand	chr6:52046805-52072744_F	0.0442255	4.68815	1	0.0555157	6.88713	1.25529	0.100497	7.19383	2.27239	0.885322	59.4946	20.0184
mm|chr1:43799321-43799380	ref|NM_024283|ens|ENSMUST00000027217|gb|AK049805|gb|AK018770		A_51_P404463	NM_024283	ref|Mus musculus RIKEN cDNA 1500015O10 gene (1500015O10Rik), mRNA [NM_024283]	1500015O10Rik	0.0546722	5.79556	1	0.0470604	5.83819	0.860775	0.784776	56.1761	14.3542	1.09443	73.5472	20.0181
mm|chr10:126666268-126666209	ref|NM_008447|ens|ENSMUST00000169813|gb|BC058396|tc|TC1575166		A_55_P2167070	NM_008447	ref|Mus musculus kinesin family member 5A (Kif5a), transcript variant 2, mRNA [NM_008447]	Kif5a	0.0537944	5.70252	1	0.0458947	5.69357	0.85315	0.065809	4.71076	1.22334	1.0664	71.6635	19.8237
mm|chr16:43939425-43939484	gb|AK018435|ens|ENSMUST00000122014|tc|TC1746547|riken|8430422M09		A_51_P301621	AK018435	gb|Mus musculus 16 days embryo lung cDNA, RIKEN full-length enriched library, clone:8430422M09 product:hypothetical protein, full insert sequence. [AK018435]	2610015P09Rik	0.0464553	4.92453	1	0.0398416	4.94265	0.857633	0.0555646	3.97744	1.19609	0.920888	61.8847	19.8231
mm|chrX:69678090-69678031	ref|NM_008067|ens|ENSMUST00000055966|gb|AK134760|riken|6330552N17		A_55_P1963463	NM_008067	ref|Mus musculus gamma-aminobutyric acid (GABA) A receptor, subunit alpha 3 (Gabra3), mRNA [NM_008067]	Gabra3	0.0645684	6.84462	1	0.160034	19.8534	2.47851	1.14733	82.1288	17.7693	1.26746	85.1748	19.6297
mm|chr7:86660122-86660181			A_30_P01021345	chr7:86651948-86675223_F	lincRNA:chr7:86651948-86675223 forward strand	chr7:86651948-86675223_F	0.0521396	5.5271	1	0.0452491	5.61348	0.867844	0.0618953	4.4306	1.18711	1.02271	68.7275	19.6149
mm|chr3:116285807-116285866	ref|NM_175413|ens|ENSMUST00000029573|gb|AK052159|gb|AK052179		A_52_P419373	NM_175413	ref|Mus musculus leucine rich repeat containing 39 (Lrrc39), transcript variant 2, mRNA [NM_175413]	Lrrc39	0.0501206	5.31307	1	0.0439698	5.45478	0.87728	0.0837601	5.99573	1.67117	0.98162	65.966	19.5852
mm|chr1:175710941-175711000			A_30_P01024771	chr1:175705225-175717250_F	lincRNA:chr1:175705225-175717250 forward strand	chr1:175705225-175717250_F	0.0492432	5.22006	1	0.0918066	11.3893	1.86435	0.0620622	4.44255	1.26032	0.964128	64.7905	19.5789
mm|chr16:22899415-22899474	ref|NM_013465|ens|ENSMUST00000023583|gb|AK167709|gb|AK133523		A_51_P424854	NM_013465	ref|Mus musculus alpha-2-HS-glycoprotein (Ahsg), mRNA [NM_013465]	Ahsg	0.0533935	5.66002	1	0.0466661	5.78926	0.874002	0.0634895	4.54472	1.18909	1.04167	70.0013	19.5093
mm|chr19:007299840-007299781			A_55_P2139823	A_55_P2139823	Unknown	A_55_P2139823	0.047651	5.05128	1	0.0409225	5.07673	0.858796	0.0586224	4.19633	1.23024	0.923757	62.0775	19.3859
mm|chr1:141982607-141982548	ref|NM_009888|ens|ENSMUST00000123238|ens|ENSMUST00000066859|ens|ENSMUST00000111976		A_55_P2017418	NM_009888	ref|Mus musculus complement component factor h (Cfh), nuclear gene encoding mitochondrial protein, mRNA [NM_009888]	Cfh	0.63629	67.4504	1	1.19939	148.794	1.88498	7.08542	507.19	11.1355	12.3054	826.937	19.3393
mm|chr6:54593269-54593210			A_30_P01018029	chr6:54592523-54593344_R	lincRNA:chr6:54592523-54593344 reverse strand	chr6:54592523-54593344_R	0.0556603	5.90031	1	0.0693212	8.5998	1.24543	0.0658769	4.71562	1.18355	1.07222	72.0544	19.2637
mm|chr8:74624539-74624598	ref|NM_146539|ens|ENSMUST00000074540|ref|XM_003086711|gb|BC119444		A_55_P1993298	NM_146539	ref|Mus musculus olfactory receptor 373 (Olfr373), mRNA [NM_146539]	Olfr373	0.0439013	4.65379	1	0.0384617	4.77146	0.876095	0.054493	3.90073	1.24126	0.841124	56.5245	19.1594
mm|chr3:95389116-95389495	ref|NM_026489|ens|ENSMUST00000128291|ens|ENSMUST00000107154|ens|ENSMUST00000090797		A_51_P497870	NM_026489	ref|Mus musculus HORMA domain containing 1 (Hormad1), mRNA [NM_026489]	Hormad1	0.0425407	4.50955	1	0.03761	4.66579	0.884095	0.0526763	3.77069	1.23826	0.800949	53.8246	18.8278
mm|chr16:22999887-22997333	ref|NM_201375|ref|NM_001102409|ref|NM_001102410|ref|NM_001102412		A_51_P161636	NM_201375	ref|Mus musculus kininogen 2 (Kng2), transcript variant 1, mRNA [NM_201375]	Kng2	0.176788	18.7406	1	0.485424	60.2204	2.7458	2.95934	211.836	16.7395	3.31504	222.774	18.7515
mm|chr11:28826647-28826706	ref|NM_146015|ens|ENSMUST00000020759|ens|ENSMUST00000093250|ens|ENSMUST00000139713		A_55_P2048767	NM_146015	ref|Mus musculus epidermal growth factor-containing fibulin-like extracellular matrix protein 1 (Efemp1), mRNA [NM_146015]	Efemp1	5.97763	633.663	1	35.0274	4345.4	5.85975	88.9244	6365.41	14.8762	111.776	7511.49	18.6991
mm|chr7:90327816-90327875	ref|XR_035179|ref|XR_035424|gb|AK040731|gb|BB490026		A_55_P2007233	XR_035179	ref|PREDICTED: Mus musculus Riken cDNA A530021J07 gene (A530021J07Rik), miscRNA [XR_035179]	A530021J07Rik	0.114671	12.1558	1	0.063325	7.85593	0.552232	0.0616997	4.4166	0.538058	2.14377	144.064	18.6949
mm|chr10:85813949-85813890	ens|ENSMUST00000139197|gb|AK087342|gb|AK043854|tc|NP715130		A_55_P2179996	ENSMUST00000139197	ens|synapsin III [Source:MGI Symbol;Acc:MGI:1351334] [ENSMUST00000139197]	Syn3	0.0507336	5.37805	1	0.0438983	5.4459	0.865272	0.0648449	4.64174	1.27815	0.947765	63.6909	18.6812
mm|chr19:39403642-39403701	ref|NM_007815|ens|ENSMUST00000164291|ens|ENSMUST00000003137|gb|D17674		A_51_P103706	NM_007815	ref|Mus musculus cytochrome P450, family 2, subfamily c, polypeptide 29 (Cyp2c29), mRNA [NM_007815]	Cyp2c29	0.043935	4.65736	1	0.0383208	4.75397	0.872217	0.0549685	3.93477	1.25113	0.819832	55.0936	18.6601
mm|chr7:17310677-17310736	ref|NM_011927|ens|ENSMUST00000001984|gb|BC140237|gb|BC146520		A_52_P523897	NM_011927	ref|Mus musculus carcinoembryonic antigen-related cell adhesion molecule 9 (Ceacam9), mRNA [NM_011927]	Ceacam9	0.0475712	5.04282	1	0.0411084	5.0998	0.864145	0.0554238	3.96736	1.16507	0.878014	59.0035	18.4568
mm|chrX:123303958-123304017			A_30_P01032481	chrX:123303474-123305531_F	lincRNA:chrX:123303474-123305531 forward strand	chrX:123303474-123305531_F	0.0626419	6.6404	1	0.0362933	4.50245	0.579378	0.0498811	3.5706	0.79629	1.14714	77.089	18.3126
mm|chr17:24161076-24161017			A_30_P01018335	chr17:24152225-24169870_R	lincRNA:chr17:24152225-24169870 reverse strand	chr17:24152225-24169870_R	0.123623	13.1047	1	0.0874834	10.8529	0.707665	0.206867	14.808	1.67337	2.20078	147.895	17.8024
mm|chr14:55682076-55682017	ref|NM_001039198|ens|ENSMUST00000036328|gb|BC050052|gb|AB190186		A_52_P382048	NM_001039198	ref|Mus musculus zinc finger homeobox 2 (Zfhx2), mRNA [NM_001039198]	Zfhx2	0.0514005	5.44875	1	0.0441955	5.48277	0.859825	0.0664925	4.75969	1.29362	0.913397	61.3813	17.7702
mm|chr18:47698032-47698091			A_30_P01033547	chr18:47697388-47878290_F	lincRNA:chr18:47697388-47878290 forward strand	chr18:47697388-47878290_F	0.0437562	4.6384	1	0.0381551	4.73342	0.871994	0.0547132	3.9165	1.25041	0.772922	51.9412	17.6643
mm|chr9:118079361-118079420			A_30_P01028482	chr9:118059348-118079494_F	lincRNA:chr9:118059348-118079494 forward strand	chr9:118059348-118079494_F	0.0464664	4.9257	1	0.039843	4.94281	0.857457	0.0555473	3.9762	1.19543	0.815951	54.8328	17.56
mm|chr1:183142778-183142719			A_30_P01022610	chr1:183142656-183163206_R	lincRNA:chr1:183142656-183163206 reverse strand	chr1:183142656-183163206_R	0.0415167	4.40101	1	0.0358327	4.4453	0.86309	0.0494846	3.54222	1.19192	0.728578	48.9612	17.549
mm|chr1:041400142-041400083			A_55_P2177716	A_55_P2177716	Unknown	A_55_P2177716	0.0493797	5.23453	1	0.0427623	5.30498	0.865989	0.0591589	4.23472	1.19804	0.85944	57.7553	17.4047
mm|chr2:132335214-132335155	ref|XM_003084508|ref|XM_003086248|gb|AK138039|riken|A130075O06		A_55_P2071142	XM_003084508	ref|PREDICTED: Mus musculus predicted gene 10757 (Gm10757), mRNA [XM_003084508]	Gm10757	0.0416687	4.41712	1	0.0362197	4.49331	0.86923	0.0516132	3.69459	1.23866	0.71925	48.3344	17.2612
mm|chr19:6402512-6402571	ref|NM_011242|ens|ENSMUST00000113468|ens|ENSMUST00000146601|ens|ENSMUST00000150713		A_55_P2143233	NM_011242	ref|Mus musculus RAS, guanyl releasing protein 2 (Rasgrp2), mRNA [NM_011242]	Rasgrp2	0.0479114	5.07888	1	0.0566759	7.03106	1.18293	0.758847	54.32	15.8386	0.818291	54.9901	17.0793
mm|chrY_random:055584185-055584244			A_55_P2038179	A_55_P2038179	Unknown	A_55_P2038179	0.0489408	5.188	1	0.0421239	5.22578	0.860712	0.179672	12.8613	3.67121	0.835109	56.1202	17.0637
mm|chrX:54637434-54637493			A_30_P01029326	chrX:54627918-54638568_F	lincRNA:chrX:54627918-54638568 forward strand	chrX:54627918-54638568_F	0.0442104	4.68655	1	0.0723512	8.97569	1.63652	0.118185	8.45997	2.67325	0.749427	50.3623	16.9514
mm|chr11:77911970-77912029	gb|AK079318|riken|9630020I17|nap|NAP025258-001		A_55_P2235387	AK079318	gb|Mus musculus 16 days neonate cerebellum cDNA, RIKEN full-length enriched library, clone:9630020I17 product:unclassifiable, full insert sequence. [AK079318]	BC017647	0.0778709	8.25476	1	0.045287	5.61818	0.581565	0.0618767	4.42927	0.794606	1.31361	88.2763	16.8691
mm|chr13:74528196-74528137			A_30_P01033527	chr13:74516152-74528284_R	lincRNA:chr13:74516152-74528284 reverse strand	chr13:74516152-74528284_R	0.0419265	4.44444	1	0.0364664	4.52392	0.869771	0.0520039	3.72256	1.24036	0.70593	47.4393	16.8373
mm|chr7:91082420-91082361	ref|NM_030728|ens|ENSMUST00000064174|gb|AK018112|gb|BC056981		A_55_P2115851	NM_030728	ref|Mus musculus RIKEN cDNA 9930013L23 gene (9930013L23Rik), mRNA [NM_030728]	9930013L23Rik	0.116246	12.3228	1	0.866486	107.494	7.45389	2.33877	167.415	20.1191	1.95378	131.297	16.8073
mm|chr2:165682201-165682142	tc|TC1676877		A_55_P2350720	TC1676877	tc|Q5M813_RAT (Q5M813) Nek4 protein, partial (5%) [TC1676877]	TC1676877	0.0514807	5.45725	1	0.0442934	5.49492	0.860388	0.0665227	4.76185	1.29219	0.864004	58.062	16.783
mm|chr17:25885628-25885569	ref|NM_018857|ens|ENSMUST00000075884|gb|AK144391|gb|AK146799		A_51_P146560	NM_018857	ref|Mus musculus mesothelin (Msln), mRNA [NM_018857]	Msln	1.35317	143.443	1	5.2725	654.092	3.89641	24.8165	1776.42	18.3396	22.6652	1523.13	16.7498
mm|chr16:90749858-90749917	ref|NM_029844|ens|ENSMUST00000125429|ens|ENSMUST00000038197|gb|AK003912		A_51_P346964	NM_029844	ref|Mus musculus melanocortin 2 receptor accessory protein (Mrap), mRNA [NM_029844]	Mrap	0.105243	11.1563	1	0.940901	116.726	8.9403	0.635454	45.4872	6.03799	1.75274	117.786	16.6543
mm|chr6:127594937-127594878			A_30_P01019788	chr6:127588224-127609749_R	lincRNA:chr6:127588224-127609749 reverse strand	chr6:127588224-127609749_R	0.0513941	5.44807	1	0.0447762	5.55482	0.871232	0.0603083	4.317	1.17345	0.85302	57.3239	16.5976
mm|chr5:151451117-151451058	ens|ENSMUST00000144378|gb|BC037393|gb|BI441540|tc|TC1585455		A_52_P444785	ENSMUST00000144378	ens|NEDD4 binding protein 2-like 2 [Source:MGI Symbol;Acc:MGI:2687207] [ENSMUST00000144378]	N4bp2l2	0.0503936	5.34201	1	0.10696	13.2691	2.12249	0.140375	10.0484	2.78558	0.833724	56.0272	16.5442
mm|chr15:77578413-77578354	ens|ENSMUST00000070911|ens|ENSMUST00000089450|gb|AK046043|gb|AK036408		A_51_P115471	ENSMUST00000070911	ens|apolipoprotein L 8 [Source:MGI Symbol;Acc:MGI:2444921] [ENSMUST00000070911]	Apol8	0.0554968	5.88297	1	0.0903395	11.2073	1.62783	0.0739221	5.29151	1.33201	0.913423	61.383	16.459
mm|chr10:21565047-21565106			A_30_P01023593	chr10:21542515-21579890_F	lincRNA:chr10:21542515-21579890 forward strand	chr10:21542515-21579890_F	0.0510134	5.40771	1	0.0458046	5.68239	0.897894	0.0928426	6.64588	1.81997	0.838236	56.3304	16.4317
mm|chrX:075310981-075311040	nap|NAP102078-1		A_55_P2066444	NAP102078-1	Unknown	NAP102078-1	0.0488143	5.1746	1	0.0419835	5.20836	0.860065	0.0613358	4.39055	1.25651	0.79627	53.5102	16.3122
mm|chr12:53672263-53672322			A_30_P01029847	chr12:53669892-53710742_F	lincRNA:chr12:53669892-53710742 forward strand	chr12:53669892-53710742_F	0.050693	5.37375	1	0.0438065	5.43451	0.864152	0.118998	8.51815	2.34743	0.823354	55.3303	16.242
mm|chr1:168592245-168592186	ref|NM_172844|ens|ENSMUST00000027843|gb|AK029219|tc|TC1590847		A_55_P2006837	NM_172844	ref|Mus musculus flavin containing monooxygenase 9 (Fmo9), mRNA [NM_172844]	Fmo9	0.0738836	7.83209	1	0.0446518	5.53937	0.604352	0.0645999	4.62421	0.874347	1.19842	80.5353	16.2204
mm|chr11:28593185-28593244	ens|ENSMUST00000146554|gb|AK013397|tc|TC1719591|riken|2810471M01		A_55_P2303488	ENSMUST00000146554	ens|RIKEN cDNA 2810471M01 gene [Source:MGI Symbol;Acc:MGI:1920068] [ENSMUST00000146554]	ENSMUST00000146554	0.0404889	4.29205	1	0.0351574	4.36153	0.868323	0.0498135	3.56576	1.2303	0.650578	43.7196	16.0681
unmapped			A_55_P1982543	A_55_P1982543	Unknown	A_55_P1982543	0.0547165	5.80026	1	0.0466234	5.78397	0.852089	0.0637927	4.56643	1.16588	0.871077	58.5373	15.9198
mm|chr4:56973830-56973771	ref|NM_001142965|ens|ENSMUST00000128276|gb|AK078331|tc|TC1652005		A_51_P307559	NM_001142965	ref|Mus musculus RIKEN cDNA 6430704M03 gene (6430704M03Rik), mRNA [NM_001142965]	6430704M03Rik	0.0532039	5.63992	1	0.0465121	5.77016	0.874223	0.0632678	4.52885	1.18916	0.845795	56.8383	15.8972
mm|chr14:32875310-32875369	ens|ENSMUST00000022460|gb|AK019470|riken|4631401E18|nap|NAP012696-001		A_51_P462428	ENSMUST00000022460	ens|UDP-N-acetyl-alpha-D-galactosamine:polypeptide N-acetylgalactosaminyltransferase-like 2 [Source:MGI Symbol;Acc:MGI:1926004] [ENSMUST00000022460]	Galntl2	0.0633089	6.71111	1	0.278261	34.5203	4.39529	0.664792	47.5873	10.5008	1.00547	67.5689	15.882
mm|chr4:147614451-147614392	ref|NM_001083342|ens|ENSMUST00000097784|ens|ENSMUST00000047720|gb|AK173152		A_55_P2097156	NM_001083342	ref|Mus musculus patched domain containing 2 (Ptchd2), mRNA [NM_001083342]	Ptchd2	0.0476919	5.05562	1	0.0409705	5.08268	0.859065	0.0586839	4.20073	1.23048	0.754547	50.7064	15.8213
mm|chr18:69178371-69178430			A_30_P01017983	chr18:69175804-69178594_F	lincRNA:chr18:69175804-69178594 forward strand	chr18:69175804-69178594_F	0.0502107	5.32262	1	0.0440455	5.46416	0.877214	0.0631435	4.51995	1.25757	0.784242	52.7019	15.619
mm|chr15:34608901-34608960	gb|AK015129|tc|TC1623619|riken|4930413F20|nap|NAP074012-1		A_55_P2213583	AK015129	gb|Mus musculus adult male testis cDNA, RIKEN full-length enriched library, clone:4930413F20 product:unclassifiable, full insert sequence. [AK015129]	4930413F20Rik	0.0492456	5.22032	1	0.0431697	5.35551	0.876619	0.0620651	4.44276	1.26032	0.767872	51.6018	15.5927
mm|chr4:88583442-88583501			A_30_P01032419	chr4:88542373-88589148_F	lincRNA:chr4:88542373-88589148 forward strand	chr4:88542373-88589148_F	0.0555347	5.88699	1	0.0522833	6.48613	0.941453	0.0762455	5.45782	1.37293	0.8653	58.1491	15.5812
mm|chr3:20115733-20115674	ref|NM_007753|ens|ENSMUST00000001921|gb|J05118|gb|AK088906		A_51_P214127	NM_007753	ref|Mus musculus carboxypeptidase A3, mast cell (Cpa3), mRNA [NM_007753]	Cpa3	0.0466923	4.94965	1	0.0400285	4.96582	0.857283	0.249092	17.8306	5.33476	0.726614	48.8292	15.5618
mm|chr16:40552682-40552741			A_30_P01032570	chr16:40552116-40552742_F	lincRNA:chr16:40552116-40552742 forward strand	chr16:40552116-40552742_F	0.0437681	4.63966	1	0.0383377	4.75607	0.875928	0.0762856	5.4607	1.74295	0.680549	45.7336	15.549
mm|chr1:81268148-81268207	ref|NM_172849|ens|ENSMUST00000068275|gb|BC082310|tc|TC1592248		A_55_P2157794	NM_172849	ref|Mus musculus RIKEN cDNA 9430031J16 gene (9430031J16Rik), mRNA [NM_172849]	9430031J16Rik	0.04244	4.49888	1	0.0374933	4.65132	0.883444	0.0663278	4.7479	1.56286	0.659071	44.2903	15.5295
mm|chr1:71984824-71984765			A_30_P01019927	chr1:71984564-71985074_R	lincRNA:chr1:71984564-71985074 reverse strand	chr1:71984564-71985074_R	0.048025	5.09092	1	0.0644608	7.99684	1.34224	0.180345	12.9095	3.75523	0.745128	50.0734	15.5154
mm|chr13:33070776-33070835	ref|NM_011454|ens|ENSMUST00000017184|ens|ENSMUST00000164541|ens|ENSMUST00000110293		A_55_P2013043	NM_011454	ref|Mus musculus serine (or cysteine) peptidase inhibitor, clade B, member 6b (Serpinb6b), mRNA [NM_011454]	Serpinb6b	0.077652	8.23156	1	0.231713	28.7457	2.984	1.12722	80.6888	14.5163	1.19776	80.4908	15.4247
mm|chr8:114150231-114150172	ref|NM_027570|ens|ENSMUST00000070004|ens|ENSMUST00000173521|gb|BC055443		A_55_P2018697	NM_027570	ref|Mus musculus lactate dehydrogenase D (Ldhd), nuclear gene encoding mitochondrial protein, mRNA [NM_027570]	Ldhd	0.0977318	10.3601	1	0.380716	47.2306	3.89552	1.08457	77.6361	11.0974	1.50448	101.103	15.394
mm|chr6:137411402-137411461	ref|NM_011216|ref|NM_001164401|ref|NM_001164402|ref|NM_001164403		A_55_P2227355	NM_011216	ref|Mus musculus protein tyrosine phosphatase, receptor type, O (Ptpro), transcript variant 1, mRNA [NM_011216]	Ptpro	0.0524937	5.56463	1	0.0505566	6.27192	0.963099	0.0628483	4.49882	1.19725	0.805974	54.1623	15.3537
mm|chrX:50406825-50406766			A_30_P01025504	chrX:50400250-50410825_R	lincRNA:chrX:50400250-50410825 reverse strand	chrX:50400250-50410825_R	0.0502969	5.33176	1	0.0441234	5.47383	0.877258	0.0632111	4.52479	1.25676	0.770609	51.7858	15.3212
mm|chr16:40465147-40465088			A_30_P01023692	chr16:40464887-40465404_R	lincRNA:chr16:40464887-40465404 reverse strand	chr16:40464887-40465404_R	0.0712699	7.55501	1	0.0666586	8.26949	0.935299	0.11028	7.89408	1.54736	1.08566	72.9574	15.2331
mm|chr2:25465016-25464957	ref|NM_029859|ens|ENSMUST00000028309|ens|ENSMUST00000129520|gb|AK014983		A_51_P184108	NM_029859	ref|Mus musculus RIKEN cDNA 4921530D09 gene (4921530D09Rik), mRNA [NM_029859]	4921530D09Rik	0.0524373	5.55865	1	0.0455501	5.65082	0.868658	0.0628966	4.50228	1.19946	0.79702	53.5606	15.1995
mm|chr16:3349421-3349480			A_30_P01029164	chr16:3337275-3355950_F	lincRNA:chr16:3337275-3355950 forward strand	chr16:3337275-3355950_F	0.0406351	4.30756	1	0.0353525	4.38573	0.869997	0.0488164	3.49439	1.20133	0.615973	41.394	15.1586
mm|chr2:163658717-163658776	ref|NM_016873|ens|ENSMUST00000029188|gb|AF100778|gb|BC032877		A_51_P390804	NM_016873	ref|Mus musculus WNT1 inducible signaling pathway protein 2 (Wisp2), mRNA [NM_016873]	Wisp2	0.994514	105.424	1	6.74224	836.424	6.77944	14.0909	1008.66	14.1687	15.015	1009.02	15.0978
mm|chr7:97000311-97000370	ref|NM_181407|ens|ENSMUST00000032856|ens|ENSMUST00000107241|gb|BC099935		A_55_P1953920	NM_181407	ref|Mus musculus malic enzyme 3, NADP(+)-dependent, mitochondrial (Me3), nuclear gene encoding mitochondrial protein, mRNA [NM_181407]	Me3	0.047052	4.98778	1	0.539903	66.9789	11.4746	0.752504	53.8659	15.993	0.710052	47.7163	15.0908
mm|chr10:75358503-75358562	ref|NM_024440|ens|ENSMUST00000009236|gb|AB047555|gb|AK007948		A_51_P491667	NM_024440	ref|Mus musculus Der1-like domain family, member 3 (Derl3), mRNA [NM_024440]	Derl3	0.231699	24.5614	1	0.0868886	10.7792	0.375007	2.82758	202.405	12.2037	3.49192	234.661	15.071
mm|chr16:40464102-40464043			A_30_P01033332	chr16:40463859-40464481_R	lincRNA:chr16:40463859-40464481 reverse strand	chr16:40463859-40464481_R	0.0446526	4.73343	1	0.0461491	5.72513	1.03351	0.0515083	3.68708	1.15354	0.669505	44.9915	14.9936
mm|chr19:23633402-23633343	ref|NM_026188|ens|ENSMUST00000035849|gb|AK006473|gb|AK014972		A_55_P2158473	NM_026188	ref|Mus musculus RIKEN cDNA 1700028P14 gene (1700028P14Rik), mRNA [NM_026188]	1700028P14Rik	0.0487981	5.17287	1	0.0420837	5.2208	0.862406	0.148926	10.6604	3.05188	0.731256	49.1412	14.9854
mm|chr6:128135379-128135438			A_30_P01033286	chr6:128116450-128147150_F	lincRNA:chr6:128116450-128147150 forward strand	chr6:128116450-128147150_F	0.0716273	7.5929	1	0.0439869	5.45689	0.614108	0.0806292	5.77162	1.12568	1.06801	71.7712	14.9106
mm|chr9:44878742-44878801	ref|NM_001093749|ens|ENSMUST00000114663|gb|EF102773|tc|TC1698478		A_55_P2076550	NM_001093749	ref|Mus musculus myelin protein zero-like 3 (Mpzl3), transcript variant 2, mRNA [NM_001093749]	Mpzl3	0.0465071	4.93002	1	0.0652019	8.08878	1.40198	0.0556484	3.98344	1.19656	0.692674	46.5485	14.8939
mm|chr4:149561219-149561160	ref|NM_009802|ens|ENSMUST00000030817|gb|AK132599|gb|BC049973		A_55_P2004370	NM_009802	ref|Mus musculus carbonic anhydrase 6 (Car6), mRNA [NM_009802]	Car6	0.0476086	5.04678	1	0.06235	7.73497	1.30964	0.312403	22.3625	6.56191	0.708757	47.6293	14.8872
mm|chr2:153168499-153168558			A_30_P01018070	chr2:153163620-153170845_F	lincRNA:chr2:153163620-153170845 forward strand	chr2:153163620-153170845_F	0.057764	6.12331	1	0.0493881	6.12696	0.854998	0.0674717	4.82978	1.16806	0.859469	57.7573	14.879
mm|chr8:111672009-111671950			A_30_P01025524	chr8:111669528-111771285_R	lincRNA:chr8:111669528-111771285 reverse strand	chr8:111669528-111771285_R	0.0564891	5.98817	1	0.0487895	6.05269	0.863698	0.107704	7.70971	1.90664	0.839138	56.391	14.8549
mm|chr17:79051463-79051522			A_30_P01023216	chr17:79042382-79051807_F	lincRNA:chr17:79042382-79051807 forward strand	chr17:79042382-79051807_F	0.0440861	4.67338	1	0.0386387	4.79342	0.876439	0.0807406	5.77959	1.83143	0.654263	43.9672	14.8406
mm|chr6:116149589-116149530	gb|AK020619|tc|TC1610827|riken|9530062K07|nap|NAP024478-001		A_55_P2193809	AK020619	gb|Mus musculus adult male urinary bladder cDNA, RIKEN full-length enriched library, clone:9530062K07 product:unclassifiable, full insert sequence. [AK020619]	9530062K07Rik	0.0527933	5.59639	1	0.0599284	7.43455	1.13515	0.102859	7.36291	1.94834	0.782707	52.5988	14.8259
mm|chr13:4486467-4486408	gb|BC021607|gb|AB097220|ens|ENSMUST00000080361|tc|TC1588674		A_51_P382764	BC021607	gb|Mus musculus aldo-keto reductase family 1, member C20, mRNA (cDNA clone MGC:37825 IMAGE:5098938), complete cds. [BC021607]	Akr1c20	0.0501624	5.3175	1	0.043437	5.38868	0.865928	0.398396	28.5181	7.94213	0.743299	49.9505	14.8178
mm|chr7:107694762-107694703	ens|ENSMUST00000064334|ens|ENSMUST00000150042|ref|XR_105138|ref|XR_107929		A_55_P2123205	ENSMUST00000064334	ens|RIKEN cDNA D630004N19 gene [Source:MGI Symbol;Acc:MGI:3028054] [ENSMUST00000064334]	ENSMUST00000064334	0.0467775	4.95868	1	0.0408447	5.06708	0.873169	0.0552329	3.95369	1.18076	0.688479	46.2666	14.7182
mm|chr9:95300259-95300318			A_30_P01018421	chr9:95295459-95301266_F	lincRNA:chr9:95295459-95301266 forward strand	chr9:95295459-95301266_F	0.0425828	4.51402	1	0.0376383	4.6693	0.883884	0.183329	13.1231	4.30523	0.61994	41.6607	14.5585
mm|chr1:172848162-172848103	ref|NM_145141|ref|NM_001160215|ref|NR_027666|ens|ENSMUST00000159171		A_51_P154485	NM_145141	ref|Mus musculus Fc receptor-like A (Fcrla), transcript variant 2, mRNA [NM_145141]	Fcrla	0.0490464	5.19919	1	0.0423953	5.25945	0.864393	0.0574286	4.11087	1.17091	0.711494	47.8132	14.5066
mm|chr17:29715884-29715825	ref|NR_045447|ens|ENSMUST00000163069|gb|AK002805|riken|0610038L08		A_55_P2287760	NR_045447	ref|Mus musculus RIKEN cDNA 0610038L08 gene (0610038L08Rik), non-coding RNA [NR_045447]	0610038L08Rik	0.0544268	5.76955	1	0.0473842	5.87836	0.870605	0.0642804	4.60134	1.18104	0.785672	52.798	14.4354
mm|chr9:55926576-55926517			A_30_P01020833	chr9:55925993-55926583_R	lincRNA:chr9:55925993-55926583 reverse strand	chr9:55925993-55926583_R	0.0464497	4.92393	1	0.0398139	4.93921	0.857141	0.0552405	3.95424	1.18925	0.666056	44.7597	14.3393
mm|chr13:67992602-67992543	gb|AK040896|gb|BC012240|gb|AK036817|gb|FJ654130		A_52_P222230	AK040896	gb|Mus musculus adult male aorta and vein cDNA, RIKEN full-length enriched library, clone:A530041D01 product:unclassifiable, full insert sequence. [AK040896]	AK040896	3.85571	408.728	1	3.31065	410.711	0.858635	54.8279	3924.7	14.2199	55.2196	3710.82	14.3215
mm|chrX:25988953-25989012	gb|AK006657|tc|NP746374|riken|1700040G22|nap|NAP092103-1		A_55_P2206446	AK006657	gb|Mus musculus adult male testis cDNA, RIKEN full-length enriched library, clone:1700040G22 product:unclassifiable, full insert sequence. [AK006657]	1700040G22Rik	0.0437963	4.64266	1	0.0381955	4.73843	0.872118	0.0547753	3.92094	1.25068	0.623603	41.9068	14.2387
mm|chr10:81083325-81083384			A_30_P01018239	chr10:81069014-81083448_F	lincRNA:chr10:81069014-81083448 forward strand	chr10:81069014-81083448_F	0.0684928	7.26063	1	0.0847694	10.5163	1.23764	0.0703263	5.03412	1.02677	0.968291	65.0702	14.1371
mm|chr6:130241238-130241179	ref|NM_024470|gb|AF283248|gb|AF074457|gb|AF283249		A_55_P1997997	NM_024470	ref|Mus musculus killer cell lectin-like receptor subfamily A, member 23 (Klra23), mRNA [NM_024470]	Klra23	0.124596	13.2079	1	2.0866	258.858	16.7469	1.9234	137.681	15.437	1.7583	118.16	14.112
mm|chr5:46033111-46033170	gb|AK035757|tc|TC1628295|riken|9630001P10|nap|NAP078947-1		A_55_P2008121	AK035757	gb|Mus musculus 16 days neonate cerebellum cDNA, RIKEN full-length enriched library, clone:9630001P10 product:unclassifiable, full insert sequence. [AK035757]	9630001P10Rik	0.0477504	5.06182	1	0.0410216	5.08903	0.859083	0.0836156	5.98539	1.7511	0.67266	45.2035	14.087
mm|chr6:130322888-130322829			A_55_P2037643	A_55_P2037643	Unknown	A_55_P2037643	0.203424	21.5641	1	3.45555	428.687	16.987	3.39551	243.058	16.6918	2.85634	191.949	14.0413
mm|chr2:35833908-35833967			A_30_P01031569	chr2:35828611-35838083_F	lincRNA:chr2:35828611-35838083 forward strand	chr2:35828611-35838083_F	0.0552818	5.86019	1	0.047884	5.94036	0.86618	0.0892512	6.3888	1.61448	0.776199	52.1615	14.0408
mm|chr8:105800296-105800237			A_30_P01031467	chr8:105742425-105852975_R	lincRNA:chr8:105742425-105852975 reverse strand	chr8:105742425-105852975_R	0.0457169	4.84625	1	0.0622747	7.72563	1.36218	0.826444	59.1587	18.0774	0.641161	43.0867	14.0246
mm|chr4:126015713-126015772			A_30_P01019212	chr4:126009815-126015875_F	lincRNA:chr4:126009815-126015875 forward strand	chr4:126009815-126015875_F	0.0760084	8.05733	1	0.0628204	7.79333	0.826493	0.0717826	5.13836	0.944403	1.05471	70.8774	13.8762
mm|chr14:101599332-101599273			A_55_P1999319	A_55_P1999319	Unknown	A_55_P1999319	0.0488848	5.18206	1	0.0420807	5.22042	0.860815	0.0614046	4.39548	1.25611	0.67777	45.5469	13.8646
mm|chr4:116795283-116795342			A_30_P01032031	chr4:116790373-116797823_F	lincRNA:chr4:116790373-116797823 forward strand	chr4:116790373-116797823_F	0.046782	4.95916	1	0.0387702	4.80972	0.828742	0.0752255	5.38481	1.608	0.648215	43.5607	13.8561
mm|chr4:129843103-129843044	ref|NM_023476|ref|NM_001168333|ens|ENSMUST00000105998|ens|ENSMUST00000105999		A_52_P418489	NM_023476	ref|Mus musculus tubulointerstitial nephritis antigen-like 1 (Tinagl1), transcript variant 1, mRNA [NM_023476]	Tinagl1	1.31475	139.371	1	7.73241	959.262	5.88126	15.9877	1144.44	12.1602	18.1932	1222.6	13.8377
mm|chr7:4916952-4916893	ref|NM_001200041|gb|AK138915|ens|ENSMUST00000144863|riken|A530002D02		A_55_P1964282	NM_001200041	ref|Mus musculus predicted gene 1078 (Gm1078), mRNA [NM_001200041]	Gm1078	0.0475934	5.04517	1	0.0411412	5.10386	0.86443	0.0554605	3.96999	1.1653	0.655351	44.0403	13.7698
mm|chr15:32171182-32171241			A_30_P01032388	chr15:32167516-32174427_F	lincRNA:chr15:32167516-32174427 forward strand	chr15:32167516-32174427_F	0.0497556	5.27438	1	0.0430438	5.3399	0.865105	0.0628666	4.50013	1.26351	0.683241	45.9145	13.7319
mm|chr13:42403101-42403160	ref|NM_010104|ens|ENSMUST00000021796|gb|AK040778|gb|AK153437		A_51_P115005	NM_010104	ref|Mus musculus endothelin 1 (Edn1), mRNA [NM_010104]	Edn1	0.0939784	9.96225	1	0.353045	43.7977	3.75666	1.58639	113.557	16.8803	1.2854	86.3806	13.6777
mm|chr13:60899748-60899689	ref|NM_027344|ens|ENSMUST00000043754|gb|AK145382|gb|AK009935		A_51_P238796	NM_027344	ref|Mus musculus cathepsin L-like 3 (Ctsll3), mRNA [NM_027344]	Ctsll3	0.0437462	4.63735	1	0.0376753	4.6739	0.861226	0.0519157	3.71625	1.18675	0.597725	40.1677	13.6635
mm|chr8:42462911-42462852			A_30_P01018515	chr8:42462791-42466106_R	lincRNA:chr8:42462791-42466106 reverse strand	chr8:42462791-42466106_R	0.0468352	4.9648	1	0.0401725	4.98369	0.85774	0.0565993	4.05151	1.20848	0.639033	42.9438	13.6443
mm|chr7:28555684-28555743	ref|NR_033484|ens|ENSMUST00000125228|ens|ENSMUST00000141753|gb|AK161337		A_55_P2118491	NR_033484	ref|Mus musculus predicted gene 10046 (Gm10046), non-coding RNA [NR_033484]	Gm10046	0.051985	5.51071	1	0.122579	15.2069	2.35798	0.512177	36.6628	9.85239	0.708442	47.6081	13.6278
mm|chr15:79802769-79802828			A_30_P01032572	chr15:79764481-79809909_F	lincRNA:chr15:79764481-79809909 forward strand	chr15:79764481-79809909_F	0.0547543	5.80427	1	0.0420166	5.21247	0.767366	0.057254	4.09837	1.04565	0.745914	50.1262	13.6229
mm|chr2:87889894-87889835	ref|NM_001011835|ens|ENSMUST00000099837|tc|NP1398925|nap|NAP112949-1		A_55_P2147706	NM_001011835	ref|Mus musculus olfactory receptor 1162 (Olfr1162), mRNA [NM_001011835]	Olfr1162	0.0545656	5.78427	1	0.0467349	5.79781	0.856491	0.0640069	4.58176	1.17303	0.738955	49.6586	13.5425
mm|chr5:146994085-146994026	ref|NM_001008547|ens|ENSMUST00000073721|gb|AK005597|gb|BC048528		A_55_P2083153	NM_001008547	ref|Mus musculus RIKEN cDNA 1700001J03 gene (1700001J03Rik), mRNA [NM_001008547]	1700001J03Rik	0.0527985	5.59695	1	0.0459055	5.69491	0.869447	0.0657825	4.70886	1.24591	0.712122	47.8554	13.4875
mm|chr2:144190202-144190143	nap|NAP070928-1		A_55_P2062242	NAP070928-1	Unknown	NAP070928-1	0.0439552	4.6595	1	0.0385241	4.77919	0.87644	0.0545169	3.90244	1.24028	0.591275	39.7343	13.4518
mm|chr13:104597557-104597498			A_30_P01030595	chr13:104591573-104599048_R	lincRNA:chr13:104591573-104599048 reverse strand	chr13:104591573-104599048_R	0.0970384	10.2866	1	0.0727731	9.02803	0.749941	0.158119	11.3185	1.62944	1.30114	87.4384	13.4086
mm|chr12:113419259-113419318	ref|NM_001097621|ens|ENSMUST00000128402|gb|BC094358|gb|AK129315		A_52_P218379	NM_001097621	ref|Mus musculus kinesin family member 26A (Kif26a), mRNA [NM_001097621]	Kif26a	0.0510387	5.4104	1	0.0445922	5.53198	0.873693	0.115501	8.26785	2.26301	0.68376	45.9495	13.3969
mm|chr17:46543945-46543886	gb|AK019325|tc|TC1764718|riken|2900034J12|nap|NAP120532-1		A_66_P101942	AK019325	gb|Mus musculus adult male hippocampus cDNA, RIKEN full-length enriched library, clone:2900034J12 product:interferon-stimulated protein (15 kDa), full insert sequence. [AK019325]	Gm9706	0.344844	36.5554	1	0.534551	66.3149	1.55012	6.92565	495.754	20.0834	4.61526	310.15	13.3836
mm|chr4:35101176-35101235	ref|NM_199157|ens|ENSMUST00000058595|gb|BC099376|tc|TC1593123		A_55_P2156588	NM_199157	ref|Mus musculus interferon kappa (Ifnk), mRNA [NM_199157]	Ifnk	0.0477659	5.06345	1	0.0410186	5.08866	0.858744	0.0588998	4.21618	1.23309	0.637627	42.8492	13.349
mm|chr7:67083320-67083261	gb|BC070450|tc|TC1618421		A_55_P2207922	BC070450	gb|Mus musculus cDNA clone IMAGE:30544858. [BC070450]	D7Ertd715e	0.0574482	6.08984	1	0.0493902	6.12721	0.859734	0.0681421	4.87777	1.18615	0.761541	51.1764	13.2561
mm|chr15:27505620-27505561	ref|XM_003085058|ref|XM_003085956|gb|AK040251|tc|TC1591739		A_55_P1984413	XM_003085058	ref|PREDICTED: Mus musculus predicted gene 9948 (Gm9948), mRNA [XM_003085058]	Gm9948	0.0840454	8.9093	1	0.140989	17.4907	1.67753	0.412563	29.5322	4.90881	1.11068	74.6388	13.2152
mm|chr2:84605722-84605663	ref|NM_009776|ens|ENSMUST00000111641|ens|ENSMUST00000023994|gb|AF010254		A_55_P1992889	NM_009776	ref|Mus musculus serine (or cysteine) peptidase inhibitor, clade G, member 1 (Serping1), mRNA [NM_009776]	Serping1	1.55536	164.877	1	1.13143	140.362	0.727438	14.8786	1065.04	9.56601	20.5417	1380.43	13.2071
mm|chr17:35693799-35693858	ref|NM_001008424|ens|ENSMUST00000044804|gb|AK133029|gb|BC055373		A_55_P2190994	NM_001008424	ref|Mus musculus corneodesmosin (Cdsn), mRNA [NM_001008424]	Cdsn	0.063107	6.6897	1	0.103095	12.7897	1.63366	0.425081	30.4283	6.73588	0.832995	55.9782	13.1997
mm|chr12:81684299-81684240	gb|AK016679|tc|NP741581|riken|4933406B15|nap|NAP073464-1		A_55_P2269983	AK016679	gb|Mus musculus adult male testis cDNA, RIKEN full-length enriched library, clone:4933406B15 product:unclassifiable, full insert sequence. [AK016679]	4933406B15Rik	0.054727	5.80137	1	0.046685	5.79161	0.853052	0.225025	16.1078	4.11178	0.721367	48.4766	13.1812
mm|chr7:111620864-111620805	ref|NM_199146|ref|NM_001167828|ens|ENSMUST00000033211|gb|AK164938		A_52_P199633	NM_199146	ref|Mus musculus tripartite motif-containing 30D (Trim30d), transcript variant 1, mRNA [NM_199146]	Trim30d	0.0560985	5.94676	1	0.360659	44.7424	6.42903	0.711151	50.9058	12.6768	0.73827	49.6125	13.1602
mm|chr12:89059007-89059066	ref|NM_001177573|ens|ENSMUST00000110149|gb|AK139752|tc|TC1586965		A_55_P2080042	NM_001177573	ref|Mus musculus expressed sequence BB287469 (BB287469), mRNA [NM_001177573]	BB287469	0.0515525	5.46486	1	0.0449088	5.57127	0.871128	0.0747216	5.34874	1.44943	0.676433	45.4571	13.1213
mm|chr3:119135367-119135426	ref|NM_170778|ens|ENSMUST00000165462|ens|ENSMUST00000039177|gb|AK054474		A_51_P473259	NM_170778	ref|Mus musculus dihydropyrimidine dehydrogenase (Dpyd), mRNA [NM_170778]	Dpyd	0.0509392	5.39985	1	0.186731	23.1653	3.66576	0.69033	49.4154	13.552	0.66748	44.8554	13.1035
mm|chr6:130003055-130002997	ref|NM_010646|ref|NM_053150|ref|NM_001039118|ref|NM_010649		A_55_P2167714	NM_010646	ref|Mus musculus killer cell lectin-like receptor subfamily A, member 12 (Klra12), mRNA [NM_010646]	Klra12	0.936704	99.296	1	13.4819	1672.53	14.393	13.4652	963.869	14.3751	12.2593	823.84	13.0877
mm|chr9:39989684-39989743			A_30_P01029684	chr9:39982939-39992189_F	lincRNA:chr9:39982939-39992189 forward strand	chr9:39982939-39992189_F	0.0464255	4.92137	1	0.039797	4.9371	0.857222	0.190194	13.6145	4.09676	0.607262	40.8087	13.0803
mm|chr1:65154192-65154133	ref|NM_175293|ens|ENSMUST00000050047|gb|AK085417|tc|TC1588722		A_55_P1952334	NM_175293	ref|Mus musculus RIKEN cDNA D630023F18 gene (D630023F18Rik), mRNA [NM_175293]	D630023F18Rik	0.0414907	4.39825	1	0.0361804	4.48844	0.872013	0.0498044	3.56511	1.20038	0.542163	36.434	13.0671
mm|chr16:21305863-21305922			A_30_P01027682	chr16:21305700-21306107_F	lincRNA:chr16:21305700-21306107 forward strand	chr16:21305700-21306107_F	0.0500719	5.3079	1	0.043352	5.37813	0.865795	0.0588515	4.21273	1.17534	0.654214	43.9639	13.0655
mm|chr7:34884789-34884848	ref|NM_001099330|ens|ENSMUST00000108083|ens|ENSMUST00000174820		A_55_P2048599	NM_001099330	ref|Mus musculus predicted gene 12776 (Gm12776), mRNA [NM_001099330]	Gm12776	0.0574796	6.09317	1	0.0494322	6.13242	0.859995	0.175743	12.5801	3.05748	0.750194	50.4139	13.0515
mm|chr5:118489336-118489395			A_55_P2039891	A_55_P2039891	Unknown	A_55_P2039891	0.0443315	4.69939	1	0.0483973	6.00404	1.09172	0.0497437	3.56077	1.12209	0.57833	38.8644	13.0456
mm|chr1:36038864-36038805	gb|BE286347		A_55_P2082250	BE286347	gb|601097807F1 NCI_CGAP_Mam5 Mus musculus cDNA clone IMAGE:3496512 5'. [BE286347]	BE286347	0.0405528	4.29883	1	0.0352146	4.36862	0.868364	0.0499209	3.57345	1.23101	0.525181	35.2927	12.9505
mm|chr1:166150216-166150275	ref|NM_007976|ens|ENSMUST00000086040|gb|AK137537|riken|9830132N20		A_55_P2076545	NM_007976	ref|Mus musculus coagulation factor V (F5), mRNA [NM_007976]	F5	0.150496	15.9534	1	0.261731	32.4696	1.73912	1.10116	78.8239	7.31691	1.94348	130.604	12.9138
mm|chr6:42712947-42713006	ref|NM_146986|ens|ENSMUST00000074499|gb|BC128054|gb|BC106817		A_55_P2038762	NM_146986	ref|Mus musculus olfactory receptor 38 (Olfr38), mRNA [NM_146986]	Olfr38	0.0574146	6.08627	1	0.0493971	6.12806	0.860358	0.0680808	4.87337	1.18578	0.738963	49.6591	12.8706
mm|chr3:106566140-106565046	ref|NM_007651|ens|ENSMUST00000038845|gb|Z16071|gb|X97227		A_51_P337675	NM_007651	ref|Mus musculus CD53 antigen (Cd53), mRNA [NM_007651]	Cd53	0.0457464	4.84938	1	0.101258	12.5618	2.21346	0.481531	34.4691	10.5261	0.587605	39.4877	12.8448
mm|chr4:124334220-124334161			A_30_P01031454	chr4:124206166-124334412_R	lincRNA:chr4:124206166-124334412 reverse strand	chr4:124206166-124334412_R	0.0556288	5.89697	1	0.0835945	10.3705	1.50272	0.0668244	4.78344	1.20126	0.714519	48.0165	12.8444
mm|chr11:54723436-54723495	ref|NM_008161|ref|NM_001083929|ens|ENSMUST00000082430|gb|AK002262		A_51_P292008	NM_008161	ref|Mus musculus glutathione peroxidase 3 (Gpx3), transcript variant 2, mRNA [NM_008161]	Gpx3	4.98331	528.259	1	13.9277	1727.83	2.79487	52.0006	3722.32	10.435	63.9992	4300.82	12.8427
mm|chr4:114586224-114586283			A_30_P01022548	chr4:114585803-114588898_F	lincRNA:chr4:114585803-114588898 forward strand	chr4:114585803-114588898_F	0.0488627	5.17973	1	0.0420188	5.21273	0.859935	0.0614957	4.402	1.25854	0.623483	41.8988	12.7599
mm|chr5:75395855-75395796			A_30_P01018708	chr5:75389503-75396250_R	lincRNA:chr5:75389503-75396250 reverse strand	chr5:75389503-75396250_R	0.0456004	4.8339	1	0.0392749	4.87233	0.861283	0.0533052	3.81571	1.16896	0.573253	38.5233	12.5712
mm|chr10:107851283-107851342	ref|NM_054056|ens|ENSMUST00000105277|ens|ENSMUST00000095313|tc|TC1601127		A_55_P2028015	NM_054056	ref|Mus musculus PRKC, apoptosis, WT1, regulator (Pawr), mRNA [NM_054056]	Pawr	0.0746803	7.91654	1	0.278871	34.5959	3.73419	0.941525	67.3965	12.6074	0.937464	62.9986	12.553
mm|chr11:75582704-75582645	ref|NM_007873|ens|ENSMUST00000021209|gb|BC067030|gb|BC022747		A_55_P2143494	NM_007873	ref|Mus musculus double C2, beta (Doc2b), mRNA [NM_007873]	Doc2b	0.0450692	4.77759	1	0.0387655	4.80914	0.860133	0.38109	27.2793	8.45566	0.565179	37.9807	12.5403
mm|chr2:29083158-29083099	ref|NM_133500|ref|NM_133501|ens|ENSMUST00000071201|ens|ENSMUST00000102873		A_55_P2129360	NM_133500	ref|Mus musculus netrin G2 (Ntng2), transcript variant a, mRNA [NM_133500]	Ntng2	0.0455123	4.82456	1	0.0391981	4.86282	0.861265	0.0532174	3.80942	1.1693	0.568812	38.2248	12.498
mm|chr16:23079732-23079791	ref|NM_001102411|ref|NM_001102412|ref|NM_201375|ens|ENSMUST00000166296		A_55_P2003410	NM_001102411	ref|Mus musculus kininogen 1 (Kng1), transcript variant 1, mRNA [NM_001102411]	Kng1	0.0534032	5.66104	1	0.0463637	5.75176	0.868183	0.726565	52.0091	13.6053	0.666216	44.7705	12.4752
mm|chr8:89270443-89270502	ref|NR_027829|ens|ENSMUST00000098532|gb|AK133050|tc|TC1639188		A_55_P2037702	NR_027829	ref|Mus musculus predicted gene 10638 (Gm10638), non-coding RNA [NR_027829]	Gm10638	1.14613	121.496	1	3.23602	401.452	2.82343	10.2915	736.689	8.97935	14.2532	957.831	12.4359
mm|chr4:129844254-129844195	ref|NM_023476|ref|NM_001168333|ens|ENSMUST00000030560|ens|ENSMUST00000105998		A_55_P2140941	NM_023476	ref|Mus musculus tubulointerstitial nephritis antigen-like 1 (Tinagl1), transcript variant 1, mRNA [NM_023476]	Tinagl1	0.435515	46.1671	1	2.90204	360.019	6.66347	4.63065	331.473	10.6326	5.4005	362.92	12.4003
mm|chr14:65654213-65654272	ens|ENSMUST00000170098|ens|ENSMUST00000067704|gb|AK038979|gb|BB179850		A_66_P116092	ENSMUST00000170098	ens|integrator complex subunit 9 [Source:MGI Symbol;Acc:MGI:1098533] [ENSMUST00000170098]	Ints9	0.0631941	6.69893	1	0.0996588	12.3634	1.57703	0.0551678	3.94903	0.87299	0.780388	52.4429	12.3491
mm|chr7:148201773-148201714	ref|NM_001033632|ens|ENSMUST00000081924|gb|BC104338|gb|BC104339		A_51_P294555	NM_001033632	ref|Mus musculus interferon induced transmembrane protein 6 (Ifitm6), mRNA [NM_001033632]	Ifitm6	0.0422354	4.4772	1	0.0718299	8.91102	1.7007	0.260636	18.6569	6.17103	0.520086	34.9503	12.314
mm|chr19:11763217-11763158	ref|NM_133353|ens|ENSMUST00000112977|ens|ENSMUST00000139158|ens|ENSMUST00000048214		A_55_P2013431	NM_133353	ref|Mus musculus oocyte secreted protein 1 (Oosp1), mRNA [NM_133353]	Oosp1	0.0446635	4.73459	1	0.0400616	4.96994	0.896965	0.0559908	4.00795	1.25361	0.546153	36.7021	12.2282
mm|chr6:129922333-129922274	ref|NM_013793|ref|NM_053152|ref|NM_053153|gb|BC125466		A_55_P2151638	NM_013793	ref|Mus musculus killer cell lectin-like receptor, subfamily A, member 15 (Klra15), mRNA [NM_013793]	Klra15	0.32887	34.8621	1	4.55348	564.892	13.8458	4.31713	309.03	13.1272	4.0193	270.101	12.2215
mm|chr2:104603064-104603123			A_30_P01029668	chr2:104590593-104606218_F	lincRNA:chr2:104590593-104606218 forward strand	chr2:104590593-104606218_F	0.0470517	4.98775	1	0.0403546	5.00628	0.857664	0.057154	4.09121	1.2147	0.574768	38.6251	12.2157
mm|chr6:130168958-130168899	ref|NM_001110323|ref|NM_014194|ens|ENSMUST00000032286|ens|ENSMUST00000088011		A_55_P2004541	NM_001110323	ref|Mus musculus killer cell lectin-like receptor, subfamily A, member 7 (Klra7), transcript variant 1, mRNA [NM_001110323]	Klra7	0.743858	78.8533	1	10.3488	1283.84	13.9123	9.28589	664.705	12.4834	9.07913	610.128	12.2055
mm|chr9:8968492-8968551	ref|NM_008829|gb|AK137726|tc|TC1635777|riken|9930117J11		A_55_P2095663	NM_008829	ref|Mus musculus progesterone receptor (Pgr), mRNA [NM_008829]	Pgr	0.0464904	4.92825	1	0.0407462	5.05487	0.876444	0.289497	20.7229	6.22704	0.567164	38.1141	12.1996
mm|chr6:126446067-126446008			A_30_P01027686	chr6:126445920-126446242_R	lincRNA:chr6:126445920-126446242 reverse strand	chr6:126445920-126446242_R	0.0497704	5.27595	1	0.204209	25.3336	4.10303	0.132563	9.48913	2.66348	0.605499	40.6902	12.1659
mm|chr2:180405663-180405604	ref|NM_177852|ens|ENSMUST00000103056|ens|ENSMUST00000037764|ens|ENSMUST00000103057		A_66_P128564	NM_177852	ref|Mus musculus death inducer-obliterator 1 (Dido1), transcript variant 2, mRNA [NM_177852]	Dido1	0.0505017	5.35347	1	0.044262	5.49102	0.876445	0.0800959	5.73344	1.586	0.613071	41.199	12.1396
mm|chr2:85278429-85278370	ref|NM_146434|ens|ENSMUST00000099924|gb|BC125413|gb|BC125415		A_52_P216507	NM_146434	ref|Mus musculus olfactory receptor 995 (Olfr995), mRNA [NM_146434]	Olfr995	0.0500102	5.30136	1	0.043801	5.43383	0.875841	0.062845	4.49859	1.25665	0.604031	40.5915	12.0782
mm|chr2:86187042-86186983	ref|NM_147021|ens|ENSMUST00000099894|tc|NP646612|nap|NAP025333-001		A_55_P2016722	NM_147021	ref|Mus musculus olfactory receptor 1055 (Olfr1055), mRNA [NM_147021]	Olfr1055	0.0478437	5.0717	1	0.04137	5.13225	0.864691	0.0557626	3.99161	1.16552	0.576441	38.7375	12.0484
mm|chr17:46991972-46991913			A_30_P01022124	chr17:46972160-46997919_R	lincRNA:chr17:46972160-46997919 reverse strand	chr17:46972160-46997919_R	0.0415087	4.40016	1	0.0645346	8.00599	1.55472	0.0546504	3.912	1.3166	0.499894	33.5934	12.0431
mm|chr11:96114996-96115055			A_30_P01021551	chr11:96111499-96126224_F	lincRNA:chr11:96111499-96126224 forward strand	chr11:96111499-96126224_F	0.0457636	4.8512	1	0.157981	19.5987	3.45212	0.376029	26.917	8.21678	0.550641	37.0037	12.0323
mm|chrX:136314278-136314220	ref|NM_001037915|ens|ENSMUST00000101217|gb|AB212222|gb|CK030596		A_66_P113659	NM_001037915	ref|Mus musculus ripply1 homolog (zebrafish) (Ripply1), mRNA [NM_001037915]	Ripply1	0.0450689	4.77756	1	0.039594	4.91193	0.878522	0.754677	54.0215	16.745	0.541293	36.3755	12.0103
mm|chr11:72080275-72080334	ref|XR_106200|gb|AK077134|tc|TC1623050|riken|4933411B07		A_55_P2317570	XR_106200	ref|PREDICTED: Mus musculus hypothetical LOC100503953 (LOC100503953), partial miscRNA [XR_106200]	LOC100503953	0.0543605	5.76252	1	0.0473553	5.87477	0.871135	0.0642023	4.59574	1.18105	0.652767	43.8667	12.0081
mm|chr19:34723796-34723855	ref|NM_008331|ens|ENSMUST00000102824|gb|U43084|gb|AK144230		A_51_P327751	NM_008331	ref|Mus musculus interferon-induced protein with tetratricopeptide repeats 1 (Ifit1), mRNA [NM_008331]	Ifit1	0.115254	12.2176	1	0.135661	16.8298	1.17706	1.932	138.297	16.7629	1.37917	92.6819	11.9664
mm|chr12:102188000-102188059	ref|XR_106463|ref|XR_106734|gb|AK153749|riken|A630072L19		A_55_P2235895	XR_106463	ref|PREDICTED: Mus musculus RIKEN cDNA A630072L19 gene (A630072L19Rik), miscRNA [XR_106463]	A630072L19Rik	0.0491453	5.20969	1	0.0424917	5.2714	0.864613	0.0878315	6.28718	1.78718	0.587645	39.4904	11.9573
mm|chr8:11656145-11655659	ref|NM_024271|ens|ENSMUST00000033906|gb|AK006019|gb|BC048664		A_52_P306007	NM_024271	ref|Mus musculus RIKEN cDNA 1700016D06 gene (1700016D06Rik), mRNA [NM_024271]	1700016D06Rik	0.0437267	4.63528	1	0.0376597	4.67196	0.861252	0.0518356	3.71051	1.18544	0.521577	35.0505	11.9281
mm|chr4:155573552-155573533	ref|NM_015783|ens|ENSMUST00000085425|gb|X56602|gb|CT010333		A_66_P128537	NM_015783	ref|Mus musculus ISG15 ubiquitin-like modifier (Isg15), mRNA [NM_015783]	Isg15	0.154961	16.4267	1	0.239053	29.6563	1.54267	2.62418	187.845	16.9345	1.84838	124.213	11.928
mm|chr5:136540130-136540189	ref|NM_027158|ens|ENSMUST00000139999|ens|ENSMUST00000006303|gb|AK009780		A_51_P345340	NM_027158	ref|Mus musculus RIKEN cDNA 2310043J07 gene (2310043J07Rik), mRNA [NM_027158]	2310043J07Rik	0.0521136	5.52433	1	0.26792	33.2374	5.14108	0.459235	32.8731	8.8122	0.618848	41.5873	11.875
mm|chr6:40719035-40719094			A_30_P01030527	chr6:40693617-40720167_F	lincRNA:chr6:40693617-40720167 forward strand	chr6:40693617-40720167_F	0.0396345	4.20149	1	0.14947	18.5428	3.77121	0.232317	16.6298	5.86147	0.469873	31.576	11.8551
mm|chr7:91083361-91083302	ref|NM_030728|ens|ENSMUST00000145171|ens|ENSMUST00000064174|gb|AB103331		A_55_P2069659	NM_030728	ref|Mus musculus RIKEN cDNA 9930013L23 gene (9930013L23Rik), mRNA [NM_030728]	9930013L23Rik	0.0880585	9.3347	1	0.183526	22.7677	2.08414	1.2882	92.2124	14.6289	1.04013	69.898	11.8118
mm|chr11:67093475-67093534	ref|NM_177369|ens|ENSMUST00000042490|ens|ENSMUST00000108686|ens|ENSMUST00000019625		A_55_P2120161	NM_177369	ref|Mus musculus myosin, heavy polypeptide 8, skeletal muscle, perinatal (Myh8), mRNA [NM_177369]	Myh8	0.0465261	4.93204	1	0.0784584	9.73334	1.68633	0.0550539	3.94088	1.18329	0.548969	36.8913	11.7991
mm|chr18:20623472-20623531	ens|ENSMUST00000097660|gb|AY170623|tc|NP1481714		A_55_P2028878	ENSMUST00000097660	ens|desmoglein 4 [Source:MGI Symbol;Acc:MGI:2661061] [ENSMUST00000097660]	Dsg4	0.0477249	5.05911	1	0.0412614	5.11878	0.864568	0.0556228	3.98161	1.16549	0.560612	37.6737	11.7467
mm|chr17:66831801-66831860			A_30_P01021949	chr17:66802920-66834745_F	lincRNA:chr17:66802920-66834745 forward strand	chr17:66802920-66834745_F	0.100536	10.6574	1	0.150324	18.6488	1.49523	0.982079	70.2994	9.76845	1.17923	79.2454	11.7294
mm|chr6:140244043-140243984	gb|AK038723|tc|TC1628495|riken|A230057D17|nap|NAP080182-1		A_55_P2044518	AK038723	gb|Mus musculus adult male hypothalamus cDNA, RIKEN full-length enriched library, clone:A230057D17 product:hypothetical protein, full insert sequence. [AK038723]	Gm3961	0.0471614	4.99938	1	0.0404955	5.02376	0.858657	0.0554465	3.96898	1.17568	0.552573	37.1335	11.7166
mm|chr9:113702464-113702523			A_30_P01021413	chr9:113648970-113715170_F	lincRNA:chr9:113648970-113715170 forward strand	chr9:113648970-113715170_F	0.0500845	5.30924	1	0.0433568	5.37872	0.865672	0.32263	23.0946	6.44172	0.586334	39.4023	11.7069
mm|chr17:27236714-27236655	ens|ENSMUST00000143605|gb|AK131746|riken|1700062I23		A_66_P113862	ENSMUST00000143605	ens|RIKEN cDNA 1700062I23 gene [Source:MGI Symbol;Acc:MGI:3704472] [ENSMUST00000143605]	ENSMUST00000143605	0.0508331	5.3886	1	0.0821547	10.1919	1.61617	0.065085	4.65893	1.28037	0.592545	39.8197	11.6567
mm|chr16:58760478-58760419	ref|NM_147001|ref|NM_147000|ens|ENSMUST00000095991|ens|ENSMUST00000049940		A_55_P2151278	NM_147001	ref|Mus musculus olfactory receptor 172 (Olfr172), mRNA [NM_147001]	Olfr172	0.0417118	4.42169	1	0.0362477	4.49679	0.869004	0.128009	9.16321	3.0689	0.485264	32.6103	11.6337
mm|chr15:74877844-74877785	ref|NM_001252058|ref|NM_001252057|ref|NM_001252056|ref|NM_001252055		A_55_P1961499	NM_001252058	ref|Mus musculus lymphocyte antigen 6 complex, locus C1 (Ly6c1), transcript variant 5, mRNA [NM_001252058]	Ly6c1	5.69503	603.706	1	26.477	3284.66	4.64914	67.053	4799.81	11.774	66.0257	4437	11.5936
mm|chr5:121236632-121236573	ref|NM_145210|ens|ENSMUST00000100785|gb|AY055831|gb|AY055830		A_51_P134030	NM_145210	ref|Mus musculus 2'-5' oligoadenylate synthetase 1E (Oas1e), mRNA [NM_145210]	Oas1e	0.063502	6.73157	1	0.128814	15.9803	2.02851	0.133304	9.54223	2.09922	0.735793	49.4461	11.5869
mm|chr9:68406219-68406278			A_30_P01025653	chr9:68349343-68411643_F	lincRNA:chr9:68349343-68411643 forward strand	chr9:68349343-68411643_F	0.0439861	4.66278	1	0.0385409	4.78128	0.876206	0.054574	3.90653	1.24071	0.509236	34.2212	11.5772
unmapped	ref|NM_013794|gb|AF074458|gb|AF146570|tc|NP378637		A_55_P2028734	NM_013794	ref|Mus musculus killer cell lectin-like receptor, subfamily A, member 16 (Klra16), mRNA [NM_013794]	Klra16	3.061	324.483	1	37.3541	4634.05	12.2033	40.914	2928.72	13.3662	35.4006	2378.96	11.565
mm|chr2:156995142-156995201			A_55_P2060163	A_55_P2060163	Unknown	A_55_P2060163	0.223715	23.7151	1	0.151438	18.7869	0.676921	0.0633376	4.53385	0.283117	2.58409	173.653	11.5508
mm|chr6:40718959-40719018			A_30_P01021982	chr6:40699474-40719122_F	lincRNA:chr6:40699474-40719122 forward strand	chr6:40699474-40719122_F	0.0414539	4.39435	1	0.307307	38.1237	7.41322	0.270222	19.3431	6.51862	0.477839	32.1113	11.527
mm|chrX:97934160-97934219	ref|NM_023608|ens|ENSMUST00000113744|ens|ENSMUST00000019503|ens|ENSMUST00000151572		A_55_P1964348	NM_023608	ref|Mus musculus glycerophosphodiester phosphodiesterase domain containing 2 (Gdpd2), mRNA [NM_023608]	Gdpd2	0.0491679	5.21207	1	0.0424598	5.26745	0.863568	0.524866	37.5711	10.675	0.566559	38.0734	11.523
mm|chr5:149781453-149781394			A_30_P01022657	chr5:149775338-149781472_R	lincRNA:chr5:149775338-149781472 reverse strand	chr5:149775338-149781472_R	0.0488213	5.17533	1	0.0420115	5.21183	0.860516	0.061296	4.3877	1.25552	0.558502	37.532	11.4397
mm|chr8:74078740-74078681	ref|NM_001100462|ens|ENSMUST00000052072|gb|BC147816|gb|BC147831		A_52_P139413	NM_001100462	ref|Mus musculus transmembrane protein 221 (Tmem221), mRNA [NM_001100462]	Tmem221	0.0529301	5.61089	1	0.0459273	5.69761	0.867696	0.221324	15.8429	4.18144	0.598176	40.1981	11.3012
mm|chr2:84607474-84605968	ref|NM_009776|ens|ENSMUST00000023994|gb|AF010254|gb|AK165744		A_51_P376238	NM_009776	ref|Mus musculus serine (or cysteine) peptidase inhibitor, clade G, member 1 (Serping1), mRNA [NM_009776]	Serping1	0.650962	69.0057	1	0.53912	66.8817	0.82819	5.04655	361.243	7.75245	7.3545	494.23	11.2979
mm|chr1:182097263-182097204	ref|NM_023341|ref|NM_001163290|ens|ENSMUST00000160879|ens|ENSMUST00000027766		A_51_P221651	NM_023341	ref|Mus musculus aarF domain containing kinase 3 (Adck3), nuclear gene encoding mitochondrial protein, transcript variant 1, mRNA [NM_023341]	Adck3	0.041562	4.40581	1	0.14572	18.0776	3.50608	0.239885	17.1715	5.77173	0.467008	31.3835	11.2364
mm|chr12:74140437-74140496			A_30_P01033434	chr12:74135916-74142780_F	lincRNA:chr12:74135916-74142780 forward strand	chr12:74135916-74142780_F	0.0477081	5.05733	1	0.041767	5.1815	0.87547	0.510956	36.5754	10.71	0.535068	35.9571	11.2154
mm|chr7:11379685-11379626	ref|NR_033707|tc|TC1584939|nap|NAP104573-1		A_65_P06115	NR_033707	ref|Mus musculus zinc finger and SCAN domain containing 4A (Zscan4a), non-coding RNA [NR_033707]	Zscan4a	0.0491829	5.21367	1	0.043125	5.34997	0.876829	0.0716906	5.13177	1.45763	0.550981	37.0265	11.2027
mm|chr6:130314256-130314197	ref|NM_013794|gb|BC144940|gb|BC119242|gb|BC144924		A_55_P1958039	NM_013794	ref|Mus musculus killer cell lectin-like receptor, subfamily A, member 16 (Klra16), mRNA [NM_013794]	Klra16	0.377871	40.0565	1	4.28913	532.098	11.3508	4.60362	329.538	12.1831	4.22653	284.028	11.1851
mm|chr18:25622748-25622689			A_30_P01028410	chr18:25622407-25635118_R	lincRNA:chr18:25622407-25635118 reverse strand	chr18:25622407-25635118_R	0.0524207	5.55689	1	0.0455061	5.64536	0.868095	0.0628278	4.49736	1.19853	0.584877	39.3044	11.1574
mm|chr6:129158493-129158434			A_30_P01028919	chr6:129151512-129208737_R	lincRNA:chr6:129151512-129208737 reverse strand	chr6:129151512-129208737_R	0.0415364	4.4031	1	0.132599	16.4498	3.19234	0.526448	37.6843	12.6744	0.46328	31.1329	11.1536
mm|chr13:64044634-64044575			A_30_P01017558	chr13:64044376-64045368_R	lincRNA:chr13:64044376-64045368 reverse strand	chr13:64044376-64045368_R	0.0478205	5.06925	1	0.0412104	5.11245	0.861772	0.0559531	4.00525	1.17006	0.533012	35.819	11.1461
mm|chr3:107036012-107035953	gb|BC042707|gb|AK044344|tc|TC1605109|tc|TC1609905		A_52_P306357	BC042707	gb|Mus musculus prokineticin 1, mRNA (cDNA clone MGC:51604 IMAGE:4975079), complete cds. [BC042707]	Prok1	0.0466978	4.95024	1	0.0400124	4.96382	0.856835	0.0561502	4.01936	1.20241	0.520022	34.9461	11.1359
mm|chr1:141594791-141594732	ref|NM_001029977|ref|NM_001160303|ref|NM_001160304|ens|ENSMUST00000027612		A_55_P2017413	NM_001029977	ref|Mus musculus predicted gene 4788 (Gm4788), transcript variant 1, mRNA [NM_001029977]	Gm4788	0.075847	8.04021	1	0.0444981	5.52032	0.586683	0.58771	42.0696	7.74862	0.842344	56.6065	11.1058
mm|chr13:42403101-42403160	ref|NM_010104|ens|ENSMUST00000021796|gb|AK040778|gb|AK153437		A_51_P115005	NM_010104	ref|Mus musculus endothelin 1 (Edn1), mRNA [NM_010104]	Edn1	0.0956444	10.1389	1	0.211835	26.2797	2.21482	1.49696	107.156	15.6513	1.06082	71.2884	11.0913
mm|chr2:128091752-128091693			A_30_P01023499	chr2:127988295-128194920_R	lincRNA:chr2:127988295-128194920 reverse strand	chr2:127988295-128194920_R	0.135158	14.3275	1	0.0524053	6.50126	0.387733	0.198938	14.2404	1.47189	1.4981	100.674	11.084
mm|chr19:34663105-34663164	ref|NM_010501|ens|ENSMUST00000102825|gb|AK151032|gb|L32974		A_51_P359570	NM_010501	ref|Mus musculus interferon-induced protein with tetratricopeptide repeats 3 (Ifit3), mRNA [NM_010501]	Ifit3	0.334086	35.4151	1	0.717985	89.0712	2.1491	5.54351	396.817	16.593	3.70206	248.783	11.0812
mm|chr1:72297934-72297875			A_30_P01026944	chr1:72297489-72298058_R	lincRNA:chr1:72297489-72298058 reverse strand	chr1:72297489-72298058_R	0.0454927	4.82248	1	0.148757	18.4544	3.26991	0.156236	11.1837	3.43431	0.502641	33.778	11.0488
mm|chr5:13814439-13814498	gb|AV264217|tc|TC1592172		A_55_P2043200	AV264217	gb|AV264217 RIKEN full-length enriched, adult male testis (DH10B) Mus musculus cDNA clone 4930444F23 3'. [AV264217]	AV264217	0.0454453	4.81747	1	0.169674	21.0493	3.73358	0.281792	20.1713	6.20069	0.500499	33.6341	11.0132
mm|chr10:128978467-128978526	ref|NM_001011849|ens|ENSMUST00000076575|nap|NAP057274-1|nap|NAP112631-1		A_66_P131006	NM_001011849	ref|Mus musculus olfactory receptor 792 (Olfr792), mRNA [NM_001011849]	Olfr792	0.0562185	5.95948	1	0.0480265	5.95803	0.854282	0.269095	19.2624	4.78659	0.618369	41.5551	10.9994
mm|chr15:3230418-3230477	ref|NM_001042614|ref|NM_009155|ref|NM_001042613|ens|ENSMUST00000159216		A_51_P470328	NM_001042614	ref|Mus musculus selenoprotein P, plasma, 1 (Sepp1), transcript variant 3, mRNA [NM_001042614]	Sepp1	19.676	2085.77	1	66.0103	8189.06	3.35486	194.548	13926.2	9.88755	215.82	14503.3	10.9687
mm|chr15:32171386-32171445			A_30_P01033116	chr15:32167516-32174417_F	lincRNA:chr15:32167516-32174417 forward strand	chr15:32167516-32174417_F	0.0630626	6.685	1	0.104577	12.9735	1.6583	0.0657946	4.70973	1.04332	0.691467	46.4674	10.9648
mm|chr5:104035129-104035070	ref|NM_029415|ens|ENSMUST00000031263|gb|BC127608|gb|AK018423		A_51_P173678	NM_029415	ref|Mus musculus solute carrier family 10 (sodium/bile acid cotransporter family), member 6 (Slc10a6), mRNA [NM_029415]	Slc10a6	0.214952	22.7861	1	0.306061	37.9691	1.42386	2.4089	172.435	11.2067	2.35318	158.136	10.9475
mm|chr14:28241253-28241312			A_30_P01019628	chr14:28231577-28242027_F	lincRNA:chr14:28231577-28242027 forward strand	chr14:28231577-28242027_F	0.0492028	5.21578	1	0.0425594	5.2798	0.864979	0.084287	6.03345	1.71305	0.538409	36.1817	10.9427
mm|chr9:53185085-53185144	ref|NM_176846|ens|ENSMUST00000051014|gb|AB098163|gb|BC120905		A_52_P130907	NM_176846	ref|Mus musculus exophilin 5 (Exph5), mRNA [NM_176846]	Exph5	0.055088	5.83964	1	0.0477117	5.91899	0.866101	0.0661079	4.73215	1.20004	0.602486	40.4877	10.9368
mm|chr15:82204436-82204377	ref|NM_019823|ref|NM_001163472|ens|ENSMUST00000023083|ens|ENSMUST00000165902		A_51_P124126	NM_019823	ref|Mus musculus cytochrome P450, family 2, subfamily d, polypeptide 22 (Cyp2d22), transcript variant 2, mRNA [NM_019823]	Cyp2d22	0.0522667	5.54057	1	0.0928532	11.5191	1.77653	0.439331	31.4483	8.40556	0.571613	38.413	10.9365
mm|chr6:115196179-115196120	ref|NM_080639|ens|ENSMUST00000032462|gb|AF282730|gb|AK079347		A_51_P355427	NM_080639	ref|Mus musculus tissue inhibitor of metalloproteinase 4 (Timp4), mRNA [NM_080639]	Timp4	0.052848	5.6022	1	0.128023	15.8822	2.42248	0.605599	43.3502	11.4593	0.577656	38.8191	10.9305
mm|chr7:52900705-52900764	ref|NM_172418|ens|ENSMUST00000153706|ens|ENSMUST00000098455|ens|ENSMUST00000150045		A_51_P122141	NM_172418	ref|Mus musculus MEF2 activating motif and SAP domain containing transcriptional regulator (Mamstr), mRNA [NM_172418]	Mamstr	0.0527823	5.59523	1	0.155813	19.3298	2.952	0.493107	35.2977	9.34228	0.575113	38.6482	10.8959
mm|chr10:97143965-97144024	ref|NM_007884|ens|ENSMUST00000020094|ens|ENSMUST00000105285|gb|D78274		A_51_P225484	NM_007884	ref|Mus musculus epiphycan (Epyc), mRNA [NM_007884]	Epyc	0.041633	4.41334	1	0.0518122	6.42769	1.2445	0.0515487	3.68997	1.23817	0.45231	30.3958	10.8642
mm|chr1:10057658-10057717	gb|AK032310|gb|AK077173|gb|AK015133|ens|ENSMUST00000118263		A_51_P428595	AK032310	gb|Mus musculus adult male olfactory brain cDNA, RIKEN full-length enriched library, clone:6430518I24 product:hypothetical protein, full insert sequence. [AK032310]	Cspp1	0.0554379	5.87673	1	0.0459988	5.70649	0.829736	0.10621	7.60274	1.91584	0.602117	40.4629	10.8611
mm|chr17:56259316-56259257	ref|NM_029796|ens|ENSMUST00000041357|gb|AK009555|gb|AK004940		A_51_P346938	NM_029796	ref|Mus musculus leucine-rich alpha-2-glycoprotein 1 (Lrg1), mRNA [NM_029796]	Lrg1	0.130883	13.8743	1	0.0468736	5.81502	0.358134	1.52338	109.047	11.6393	1.41885	95.3486	10.8406
mm|chr13:28975374-28975433			A_30_P01017483	chr13:28477490-28985604_F	lincRNA:chr13:28477490-28985604 forward strand	chr13:28477490-28985604_F	0.049344	5.23075	1	0.0432765	5.36876	0.877035	0.0622124	4.45331	1.26079	0.534248	35.902	10.827
mm|chr6:67716229-67716170	ens|ENSMUST00000103306|nap|NAP004513-003		A_55_P2140286	ENSMUST00000103306	ens|immunoglobulin kappa variable 1-131 [Source:MGI Symbol;Acc:MGI:3645551] [ENSMUST00000103306]	ENSMUST00000103306	0.0467845	4.95943	1	0.0401324	4.97872	0.857815	0.0564748	4.04259	1.20713	0.506466	34.035	10.8255
mm|chr4:124252516-124252575	gb|AK160260|gb|XR_106273|tc|TC1739163|riken|4933407E24		A_66_P126104	AK160260	gb|Mus musculus adult male testis cDNA, RIKEN full-length enriched library, clone:4933407E24 product:hypothetical Rieske iron-sulfur protein containing protein, full insert sequence. [AK160260]	4933407E24Rik	0.0504569	5.34872	1	0.0434999	5.39648	0.86212	0.0647595	4.63563	1.28346	0.544144	36.5671	10.7843
mm|chr1:167802668-167802727			A_30_P01027475	chr1:167797581-167803031_F	lincRNA:chr1:167797581-167803031 forward strand	chr1:167797581-167803031_F	0.049823	5.28152	1	0.0431113	5.34827	0.86529	0.0629734	4.50778	1.26394	0.536727	36.0687	10.7727
mm|chr16:25968858-25965935	ref|NM_173379|gb|AJ430350|tc|TC1585868|nap|NAP028626-1		A_52_P109270	NM_173379	ref|Mus musculus leprecan-like 1 (Leprel1), mRNA [NM_173379]	Leprel1	0.0522338	5.53708	1	0.0434934	5.39567	0.832668	0.0601345	4.30456	1.15126	0.561879	37.7589	10.757
mm|chr7:117146883-117146942			A_30_P01024118	chr7:117140887-117152562_F	lincRNA:chr7:117140887-117152562 forward strand	chr7:117140887-117152562_F	0.0469273	4.97456	1	0.040253	4.99367	0.857774	0.11535	8.25701	2.45806	0.504717	33.9175	10.7553
mm|chr12:114659689-114659630	ens|ENSMUST00000103426|gb|AK088666|gb|AF052834|gb|AF052835		A_51_P485421	ENSMUST00000103426	ens|immunoglobulin heavy constant mu [Source:MGI Symbol;Acc:MGI:96448] [ENSMUST00000103426]	ENSMUST00000103426	0.0523241	5.54665	1	0.0454719	5.64112	0.869044	0.0628092	4.49603	1.20039	0.562586	37.8064	10.752
mm|chr7:131102865-131102924			A_55_P1985104	A_55_P1985104	Unknown	A_55_P1985104	0.100573	10.6613	1	0.0429218	5.32476	0.426771	0.0593575	4.24894	0.590191	1.07913	72.5185	10.7298
unmapped	ref|NM_013794|gb|AF146570|tc|NP378637|nap|NAP057542-1		A_55_P1958038	NM_013794	ref|Mus musculus killer cell lectin-like receptor, subfamily A, member 16 (Klra16), mRNA [NM_013794]	Klra16	0.664846	70.4775	1	7.81185	969.117	11.7499	7.64819	547.475	11.5037	7.12875	479.06	10.7224
mm|chr9:54756566-54756625	ref|NM_022655|ens|ENSMUST00000034843|gb|BC044665|gb|AK049315		A_52_P77332	NM_022655	ref|Mus musculus iron responsive element binding protein 2 (Ireb2), mRNA [NM_022655]	Ireb2	0.325691	34.5251	1	0.349411	43.347	1.07283	0.282757	20.2404	0.868177	3.48816	234.408	10.71
mm|chr1:175706587-175706528			A_30_P01022549	chr1:175705225-175717250_R	lincRNA:chr1:175705225-175717250 reverse strand	chr1:175705225-175717250_R	0.052268	5.54071	1	0.0606339	7.52207	1.16006	0.49774	35.6294	9.52284	0.559275	37.5839	10.7001
mm|chr2:85503770-85503711	ref|NM_013728|ens|ENSMUST00000099918|gb|BC120642|gb|BC120644		A_51_P122033	NM_013728	ref|Mus musculus olfactory receptor 154 (Olfr154), mRNA [NM_013728]	Olfr154	0.0405655	4.30018	1	0.0352402	4.3718	0.868723	0.0499575	3.57607	1.23153	0.433767	29.1496	10.693
mm|chr7:52900705-52900764	ref|NM_172418|ens|ENSMUST00000153706|ens|ENSMUST00000098455|ens|ENSMUST00000150045		A_51_P122141	NM_172418	ref|Mus musculus MEF2 activating motif and SAP domain containing transcriptional regulator (Mamstr), mRNA [NM_172418]	Mamstr	0.0448927	4.75889	1	0.127847	15.8603	2.84783	0.435332	31.162	9.69716	0.479215	32.2037	10.6747
mm|chr7:26011818-26011877	ref|NM_175436|ens|ENSMUST00000055604|gb|AK050839|tc|TC1585324		A_52_P517204	NM_175436	ref|Mus musculus zinc finger protein 526 (Zfp526), mRNA [NM_175436]	Zfp526	0.0465516	4.93473	1	0.0406442	5.04221	0.873101	0.0549228	3.9315	1.17983	0.496715	33.3798	10.6702
mm|chr1:109167973-109167914	ref|NM_201363|ens|ENSMUST00000027565|gb|AK003650|tc|TC1591158		A_51_P100997	NM_201363	ref|Mus musculus serine (or cysteine) peptidase inhibitor, clade B, member 3C (Serpinb3c), mRNA [NM_201363]	Serpinb3c	0.0436748	4.62977	1	0.0595598	7.38883	1.36371	0.0545829	3.90717	1.24976	0.465981	31.3145	10.6693
mm|chr16:4868161-4868102			A_30_P01023011	chr16:4867322-4874772_R	lincRNA:chr16:4867322-4874772 reverse strand	chr16:4867322-4874772_R	0.0481596	5.10519	1	0.0415932	5.15994	0.863654	0.0597009	4.27352	1.23965	0.513442	34.5039	10.6613
mm|chrX:35254206-35254147	ref|NM_023894|ens|ENSMUST00000089062|gb|DQ058646|gb|AF201698		A_51_P346132	NM_023894	ref|Mus musculus reproductive homeobox 9 (Rhox9), mRNA [NM_023894]	Rhox9	0.0549778	5.82796	1	0.0591042	7.3323	1.07506	0.692781	49.5908	12.6011	0.584948	39.3091	10.6397
mm|chr4:104751569-104751628			A_55_P2040305	A_55_P2040305	Unknown	A_55_P2040305	0.0991994	10.5157	1	0.0931351	11.5541	0.938868	0.170315	12.1915	1.71689	1.04975	70.5446	10.5823
mm|chr10:38972845-38972904			A_30_P01029404	chr10:38969397-38972974_F	lincRNA:chr10:38969397-38972974 forward strand	chr10:38969397-38972974_F	0.0564739	5.98656	1	0.048748	6.04754	0.863195	0.0718154	5.14071	1.27166	0.596752	40.1024	10.5669
mm|chr19:9158256-9158197	ref|NM_011681|ens|ENSMUST00000025554|gb|X67702|gb|AK145844		A_51_P128575	NM_011681	ref|Mus musculus secretoglobin, family 1A, member 1 (uteroglobin) (Scgb1a1), mRNA [NM_011681]	Scgb1a1	0.0586438	6.21658	1	0.11551	14.3298	1.96968	0.266784	19.097	4.54922	0.61844	41.5598	10.5457
mm|chr6:129994094-129994035	ref|NM_010649|ref|NM_001252577|ref|NM_053153|ens|ENSMUST00000014477		A_55_P2004536	NM_010649	ref|Mus musculus killer cell lectin-like receptor, subfamily A, member 4 (Klra4), transcript variant 1, mRNA [NM_010649]	Klra4	5.04527	534.827	1	61.1768	7589.43	12.1256	57.678	4128.72	11.4321	53.1795	3573.72	10.5405
mm|chr9:75333646-75333587			A_30_P01031243	chr9:75316023-75344401_R	lincRNA:chr9:75316023-75344401 reverse strand	chr9:75316023-75344401_R	0.0494469	5.24166	1	0.0425663	5.28066	0.860849	0.0627611	4.49258	1.26926	0.51925	34.8942	10.5012
mm|chr4:126711824-126711765			A_30_P01023059	chr4:126710640-126721240_R	lincRNA:chr4:126710640-126721240 reverse strand	chr4:126710640-126721240_R	0.046727	4.95333	1	0.0400241	4.96528	0.856551	0.0562228	4.02455	1.20322	0.489807	32.9156	10.4823
unmapped	ref|NM_013793|gb|AY003920|gb|BC125466|gb|BC125494		A_52_P514407	NM_013793	ref|Mus musculus killer cell lectin-like receptor, subfamily A, member 15 (Klra15), mRNA [NM_013793]	Klra15	3.28733	348.476	1	38.2419	4744.19	11.6331	38.2905	2740.92	11.6479	34.367	2309.5	10.4544
mm|chr8:122576633-122576692	ref|NM_030209|ens|ENSMUST00000132583|gb|AK171073|riken|F630222G03		A_55_P2052016	NM_030209	ref|Mus musculus cysteine-rich secretory protein LCCL domain containing 2 (Crispld2), mRNA [NM_030209]	Crispld2	0.541285	57.3793	1	0.703105	87.2253	1.29895	5.22761	374.204	9.65778	5.65835	380.248	10.4535
mm|chr11:72122169-72122228	ref|NM_001037713|ens|ENSMUST00000094041|ens|ENSMUST00000142921|ens|ENSMUST00000146233		A_55_P1966833	NM_001037713	ref|Mus musculus XIAP associated factor 1 (Xaf1), mRNA [NM_001037713]	Xaf1	0.178038	18.873	1	0.315415	39.1296	1.77162	2.50007	178.961	14.0423	1.8579	124.853	10.4354
mm|chr5:149810802-149810743			A_55_P2038514	A_55_P2038514	Unknown	A_55_P2038514	0.056987	6.04095	1	0.0479456	5.948	0.841342	0.0941681	6.74076	1.65245	0.58957	39.6198	10.3457
mm|chr6:40718898-40718957			A_30_P01027687	chr6:40699474-40719122_F	lincRNA:chr6:40699474-40719122 forward strand	chr6:40699474-40719122_F	0.0835313	8.8548	1	0.3766	46.72	4.50849	0.321936	23.0449	3.85408	0.861078	57.8654	10.3084
mm|chr1:135250782-135250841	ref|NM_031192|ens|ENSMUST00000112288|ens|ENSMUST00000094556|ref|XM_001472632		A_55_P1966304	NM_031192	ref|Mus musculus renin 1 structural (Ren1), mRNA [NM_031192]	Ren1	0.0998048	10.5799	1	0.24486	30.3767	2.45339	0.347945	24.9067	3.48626	1.02365	68.7906	10.2566
mm|chr5:30434539-30434598	gb|BC113782|gb|BC113783		A_55_P2038854	BC113782	gb|Mus musculus family with sequence similarity 59, member B, mRNA (cDNA clone IMAGE:40060782), complete cds. [BC113782]	Fam59b	0.0524024	5.55496	1	0.0454587	5.63948	0.867492	0.0627529	4.49199	1.19752	0.537395	36.1136	10.2552
mm|chr17:54413328-54413269	ref|NM_022025|ens|ENSMUST00000095712|gb|AK164116|gb|BC065089		A_55_P2025690	NM_022025	ref|Mus musculus solute carrier family 5 (choline transporter), member 7 (Slc5a7), mRNA [NM_022025]	Slc5a7	0.190998	20.2468	1	1.0193	126.451	5.3367	2.61563	187.233	13.6946	1.95323	131.259	10.2265
mm|chr10:120184672-120184613	ref|XM_003084843|ref|XM_003085728|gb|AK156853|riken|F830103F16		A_55_P1997190	XM_003084843	ref|PREDICTED: Mus musculus predicted gene 10743 (Gm10743), mRNA [XM_003084843]	Gm10743	0.0416876	4.41912	1	0.0362438	4.4963	0.869415	0.0516552	3.69759	1.2391	0.422119	28.3669	10.1258
mm|chr16:64786310-64786251			A_30_P01025026	chr16:64786250-64814249_R	lincRNA:chr16:64786250-64814249 reverse strand	chr16:64786250-64814249_R	0.050872	5.39272	1	0.0439714	5.45497	0.864353	0.136857	9.79656	2.69023	0.514718	34.5896	10.1179
mm|chr4:53861854-53861913	ref|NM_028053|ens|ENSMUST00000030127|gb|AB261159|gb|AK153075		A_51_P181865	NM_028053	ref|Mus musculus transmembrane protein 38B (Tmem38b), mRNA [NM_028053]	Tmem38b	0.0421584	4.46903	1	0.153646	19.0609	3.64449	0.46584	33.3458	11.0497	0.425874	28.6192	10.1018
mm|chr5:136150464-136150523			A_30_P01022024	chr5:136150450-136160852_F	lincRNA:chr5:136150450-136160852 forward strand	chr5:136150450-136160852_F	0.0514982	5.4591	1	0.0627844	7.78887	1.21916	0.21114	15.1139	4.09996	0.519035	34.8797	10.0787
mm|chr9:96673370-96673311			A_30_P01023444	chr9:96664617-96683617_R	lincRNA:chr9:96664617-96683617 reverse strand	chr9:96664617-96683617_R	0.0487917	5.1722	1	0.0420889	5.22144	0.862625	0.0907608	6.49686	1.86017	0.491257	33.013	10.0685
mm|chr10:59834799-59834858	ref|NM_028732|ref|NM_001159572|ens|ENSMUST00000020301|gb|AK014600		A_51_P372992	NM_028732	ref|Mus musculus RIKEN cDNA 4632428N05 gene (4632428N05Rik), transcript variant 1, mRNA [NM_028732]	4632428N05Rik	0.115863	12.2821	1	0.303274	37.6233	2.61753	0.993026	71.083	8.57072	1.16597	78.3547	10.0634
mm|chr3:153516456-153516514	ref|NM_025758|gb|AK017090|gb|AF425641|gb|BC049572		A_51_P120398	NM_025758	ref|Mus musculus ankyrin repeat and SOCS box-containing 17 (Asb17), mRNA [NM_025758]	Asb17	0.04388	4.65153	1	0.0384419	4.769	0.87607	0.0544415	3.89704	1.24069	0.439835	29.5574	10.0236
mm|chr8:91572165-91572106			A_30_P01027888	chr8:91569369-91594119_R	lincRNA:chr8:91569369-91594119 reverse strand	chr8:91569369-91594119_R	0.0437172	4.63428	1	0.0525122	6.51452	1.20118	0.0542356	3.8823	1.2406	0.437032	29.369	9.99679
mm|chr9:103112885-103112826	ref|NM_133977|ens|ENSMUST00000112645|ens|ENSMUST00000035158|gb|AF440692		A_55_P2037585	NM_133977	ref|Mus musculus transferrin (Trf), mRNA [NM_133977]	Trf	0.125441	13.2974	1	0.267721	33.2128	2.13424	1.19953	85.8651	9.56252	1.25152	84.1038	9.977
mm|chr6:149233779-149233720			A_30_P01024333	chr6:149232359-149235295_R	lincRNA:chr6:149232359-149235295 reverse strand	chr6:149232359-149235295_R	0.0564224	5.9811	1	0.0487185	6.04389	0.86346	0.0674454	4.82789	1.19536	0.557862	37.4889	9.88723
mm|chr6:67098487-67098546			A_30_P01032718	chr6:67052066-67119366_F	lincRNA:chr6:67052066-67119366 forward strand	chr6:67052066-67119366_F	0.115535	12.2473	1	0.0755207	9.36889	0.653662	0.0992745	7.10629	0.859261	1.14011	76.6164	9.86809
mm|chr8:74130566-74130625	ref|NM_001166213|ens|ENSMUST00000126559|ens|ENSMUST00000127285|ens|ENSMUST00000124485		A_55_P2147791	NM_001166213	ref|Mus musculus family with sequence similarity 129, member C (Fam129c), mRNA [NM_001166213]	Fam129c	0.0474266	5.02749	1	0.0647758	8.0359	1.36581	0.0488203	3.49467	1.02939	0.467809	31.4373	9.86384
mm|chr18:67484277-67484218	ref|NR_033214|gb|AK046629|gb|AK148585|gb|AK164742		A_55_P2118471	NR_033214	ref|Mus musculus RIKEN cDNA B430212C06 gene (B430212C06Rik), non-coding RNA [NR_033214]	B430212C06Rik	0.0742008	7.86571	1	0.0382662	4.74721	0.515712	0.0518156	3.70908	0.698316	0.730627	49.099	9.84663
mm|chr14:43929300-43929241			A_30_P01028386	chr14:43929100-43945100_R	lincRNA:chr14:43929100-43945100 reverse strand	chr14:43929100-43945100_R	0.0567836	6.01938	1	0.0878154	10.8941	1.54649	0.0676762	4.84442	1.19183	0.557558	37.4685	9.819
mm|chr9:30793922-30793863			A_30_P01025864	chr9:30793551-30817648_R	lincRNA:chr9:30793551-30817648 reverse strand	chr9:30793551-30817648_R	0.234761	24.886	1	0.0465733	5.77775	0.198386	0.180042	12.8878	0.766914	2.30184	154.686	9.80502
mm|chr1:164760096-164760037	ref|NM_010231|ens|ENSMUST00000046049|gb|D16215|gb|U87456		A_52_P508991	NM_010231	ref|Mus musculus flavin containing monooxygenase 1 (Fmo1), mRNA [NM_010231]	Fmo1	0.053435	5.66442	1	0.0976496	12.1141	1.82744	0.536324	38.3913	10.0369	0.523895	35.2063	9.80433
mm|chr4:155573708-155573649	ref|NM_015783|ens|ENSMUST00000085425|gb|BC109346|gb|BC083156		A_55_P2103698	NM_015783	ref|Mus musculus ISG15 ubiquitin-like modifier (Isg15), mRNA [NM_015783]	Isg15	2.33608	247.638	1	3.04169	377.343	1.30205	33.2246	2378.29	14.2224	22.8579	1536.07	9.78471
mm|chr4:8351686-8351627			A_30_P01025404	chr4:8351625-8358785_R	lincRNA:chr4:8351625-8358785 reverse strand	chr4:8351625-8358785_R	0.0465394	4.93344	1	0.0398867	4.94824	0.857053	0.0551142	3.9452	1.18425	0.453951	30.506	9.75413
mm|chr3:107741825-107741766	ref|NM_008184|ens|ENSMUST00000106684|ens|ENSMUST00000106685|gb|AK015265		A_55_P2031692	NM_008184	ref|Mus musculus glutathione S-transferase, mu 6 (Gstm6), mRNA [NM_008184]	Gstm6	0.0527026	5.58678	1	0.128381	15.9266	2.43595	0.450383	32.2394	8.54574	0.512797	34.4605	9.73
mm|chrX:138123547-138123606	ref|NM_001163155|ref|NM_007736|ens|ENSMUST00000112930|ens|ENSMUST00000087358		A_55_P1969367	NM_001163155	ref|Mus musculus collagen, type IV, alpha 5 (Col4a5), transcript variant 1, mRNA [NM_001163155]	Col4a5	0.403016	42.722	1	2.11572	262.471	5.24973	4.55504	326.06	11.3024	3.91767	263.272	9.72088
mm|chr3:95800401-95800460	ref|XR_107523		A_55_P2179766	XR_107523	ref|PREDICTED: Mus musculus hypothetical LOC100505228 (LOC100505228), partial miscRNA [XR_107523]	LOC100505228	0.0478714	5.07464	1	0.0412549	5.11797	0.861786	0.05599	4.00789	1.16959	0.462462	31.0779	9.66051
mm|chr5:115362168-115362227	ref|NM_011854|ens|ENSMUST00000171068|ens|ENSMUST00000144064|ens|ENSMUST00000031542		A_51_P387123	NM_011854	ref|Mus musculus 2'-5' oligoadenylate synthetase-like 2 (Oasl2), mRNA [NM_011854]	Oasl2	0.267451	28.3513	1	0.173216	21.4886	0.647653	4.0433	289.428	15.1179	2.56604	172.441	9.59444
mm|chr18:62767284-62767225	ref|NM_001168423|ens|ENSMUST00000097557|gb|AK139149|riken|A730049K10		A_55_P2155754	NM_001168423	ref|Mus musculus serine peptidase inhibitor, Kazal type 13 (Spink13), mRNA [NM_001168423]	Spink13	0.0436143	4.62337	1	0.0382081	4.73999	0.876044	0.0920015	6.58568	2.10943	0.418152	28.1003	9.58748
mm|chr7:112030114-112030173	ref|NM_146814|ens|ENSMUST00000098165|gb|BC146342|gb|BC148826		A_55_P2095683	NM_146814	ref|Mus musculus olfactory receptor 665 (Olfr665), mRNA [NM_146814]	Olfr665	0.0499587	5.2959	1	0.0435936	5.40811	0.872594	0.0603464	4.31973	1.20793	0.478786	32.175	9.58364
mm|chr11:51007582-51007641			A_30_P01030662	chr11:50994911-51050704_F	lincRNA:chr11:50994911-51050704 forward strand	chr11:50994911-51050704_F	0.0525438	5.56995	1	0.0457966	5.6814	0.871588	0.0884095	6.32855	1.68259	0.501763	33.7191	9.54943
mm|chr13:53499378-53499319	gb|AK006834|riken|1700058M13|nap|NAP019193-001		A_55_P2214580	AK006834	gb|Mus musculus adult male testis cDNA, RIKEN full-length enriched library, clone:1700058M13 product:unclassifiable, full insert sequence. [AK006834]	1700058M13Rik	0.0465537	4.93496	1	0.0399003	4.94992	0.857081	0.940228	67.3036	20.1966	0.444053	29.8409	9.53851
mm|chr6:130013175-130013116			A_55_P2157522	A_55_P2157522	Unknown	A_55_P2157522	0.818215	86.7355	1	10.0269	1243.91	12.2546	8.10958	580.502	9.9113	7.79685	523.957	9.5291
unmapped			A_55_P2035335	A_55_P2035335	Unknown	A_55_P2035335	0.240183	25.4608	1	0.176565	21.9041	0.735124	0.173053	12.3875	0.720505	2.28524	153.571	9.51457
unmapped	gb|BU936879		A_55_P2253696	BU936879	gb|AGENCOURT_10524094 NIH_MGC_169 Mus musculus cDNA clone IMAGE:6704706 5', mRNA sequence [BU936879]	1700085B03Rik	0.0482497	5.11474	1	0.0432778	5.36892	0.896955	0.0603621	4.32085	1.25104	0.458882	30.8374	9.51058
mm|chr2:124950151-124950092	tc|TC1649435		A_55_P2059636	TC1649435	tc|Q8IPT5_DROME (Q8IPT5) CG32440-PA, partial (15%) [TC1649435]	TC1649435	0.0491668	5.21196	1	0.0425212	5.27506	0.864836	0.089625	6.41556	1.82288	0.464088	31.1872	9.43905
mm|chr11:81930108-81930167	ref|NM_021443|ens|ENSMUST00000009329|ref|XM_003085741|gb|BC117101		A_51_P464703	NM_021443	ref|Mus musculus chemokine (C-C motif) ligand 8 (Ccl8), mRNA [NM_021443]	Ccl8	0.629735	66.7555	1	0.714308	88.6151	1.1343	3.31063	236.983	5.25718	5.91756	397.666	9.3969
mm|chr4:53044003-53043944	ref|NM_013454|ens|ENSMUST00000030010|gb|AK045442|gb|DJ026144		A_52_P665675	NM_013454	ref|Mus musculus ATP-binding cassette, sub-family A (ABC1), member 1 (Abca1), mRNA [NM_013454]	Abca1	0.297491	31.5358	1	1.21339	150.529	4.07872	2.56419	183.55	8.61937	2.79342	187.721	9.38991
mm|chr6:5433500-5433441	ref|NM_013743|ens|ENSMUST00000019721|gb|AK036818|gb|AK004543		A_51_P350453	NM_013743	ref|Mus musculus pyruvate dehydrogenase kinase, isoenzyme 4 (Pdk4), nuclear gene encoding mitochondrial protein, mRNA [NM_013743]	Pdk4	1.0759	114.052	1	4.62703	574.017	4.30061	10.7908	772.431	10.0296	10.0919	678.184	9.3799
mm|chr17:33956881-33956940	ref|NM_030697|ens|ENSMUST00000048560|gb|BC140362|gb|AK132011		A_55_P2173188	NM_030697	ref|Mus musculus KN motif and ankyrin repeat domains 3 (Kank3), mRNA [NM_030697]	Kank3	0.0461638	4.89363	1	0.161599	20.0475	3.50054	0.318443	22.7948	6.8981	0.431915	29.0252	9.35614
mm|chr14:21389793-21389852	ref|NR_033571|ens|ENSMUST00000141265|ens|ENSMUST00000124940|gb|AK007938		A_55_P2206491	NR_033571	ref|Mus musculus RIKEN cDNA 1810062O18 gene (1810062O18Rik), non-coding RNA [NR_033571]	1810062O18Rik	0.0395982	4.19763	1	0.306026	37.9647	7.72828	0.163006	11.6683	4.1165	0.37011	24.8718	9.34665
mm|chr7:119259615-119259556	ref|NM_015814|ens|ENSMUST00000033036|gb|AK004853|gb|AK208577		A_55_P2083609	NM_015814	ref|Mus musculus dickkopf homolog 3 (Xenopus laevis) (Dkk3), mRNA [NM_015814]	Dkk3	1.47738	156.61	1	3.4572	428.891	2.34009	11.7402	840.389	7.94665	13.7759	925.757	9.32458
mm|chr19:6403507-6403563	ref|NM_011242|ens|ENSMUST00000133968|ens|ENSMUST00000139522|ens|ENSMUST00000146831		A_55_P2143219	NM_011242	ref|Mus musculus RAS, guanyl releasing protein 2 (Rasgrp2), mRNA [NM_011242]	Rasgrp2	0.188047	19.9341	1	0.0422747	5.24449	0.224809	1.45529	104.173	7.73895	1.75278	117.789	9.32096
mm|chr12:3407473-3407414			A_30_P01024382	chr12:3407353-3426580_R	lincRNA:chr12:3407353-3426580 reverse strand	chr12:3407353-3426580_R	0.0625199	6.62747	1	0.0530452	6.58065	0.848453	0.112747	8.07071	1.80338	0.582608	39.1519	9.31876
mm|chr8:122575417-122575476	ref|NM_030209|ens|ENSMUST00000108972|ens|ENSMUST00000132583|gb|AK154308		A_55_P2004016	NM_030209	ref|Mus musculus cysteine-rich secretory protein LCCL domain containing 2 (Crispld2), mRNA [NM_030209]	Crispld2	1.38083	146.376	1	1.7629	218.7	1.2767	12.4687	892.535	9.02983	12.8657	864.588	9.31736
mm|chr6:130241246-130241187	ref|NM_024470|ref|NR_033451|ens|ENSMUST00000144414|gb|AF074459		A_55_P1998011	NM_024470	ref|Mus musculus killer cell lectin-like receptor subfamily A, member 23 (Klra23), mRNA [NM_024470]	Klra23	0.18952	20.0902	1	1.88706	234.104	9.95706	1.92028	137.458	10.1323	1.75645	118.035	9.26786
mm|chr5:103355162-103355103	ref|NM_001081567|ref|NM_009158|ens|ENSMUST00000141573|ens|ENSMUST00000112847		A_55_P2070529	NM_001081567	ref|Mus musculus mitogen-activated protein kinase 10 (Mapk10), transcript variant 2, mRNA [NM_001081567]	Mapk10	0.0579443	6.14242	1	0.0494568	6.13548	0.853524	0.127357	9.11648	2.19792	0.536933	36.0825	9.26637
mm|chr16:85858461-85858402	ref|NM_011782|gb|AK046558|tc|TC1598269|riken|B430009L16		A_55_P1956918	NM_011782	ref|Mus musculus a disintegrin-like and metallopeptidase (reprolysin type) with thrombospondin type 1 motif, 5 (aggrecanase-2) (Adamts5), mRNA [NM_011782]	Adamts5	0.197836	20.9718	1	0.228804	28.3849	1.15653	1.47597	105.653	7.46058	1.8319	123.106	9.2597
mm|chr17:75446945-75447004	ens|ENSMUST00000079577|gb|AK053964|tc|TC1595656|riken|E230007P04		A_55_P1973036	ENSMUST00000079577	ens|latent transforming growth factor beta binding protein 1 [Source:MGI Symbol;Acc:MGI:109151] [ENSMUST00000079577]	Ltbp1	0.0528433	5.60169	1	0.0673546	8.35583	1.27461	0.565724	40.4958	10.7057	0.488624	32.8361	9.24667
mm|chr4:143860736-143860677	ref|NM_001085418|ens|ENSMUST00000035757|gb|BC052827|tc|TC1604074		A_55_P2081892	NM_001085418	ref|Mus musculus preferentially expressed antigen in melanoma like 5 (Pramel5), mRNA [NM_001085418]	Pramel5	0.047109	4.99382	1	0.0403977	5.01162	0.857536	0.0572923	4.10111	1.21617	0.433551	29.1351	9.20314
mm|chr4:133807108-133807049	ref|NM_001099296|gb|AK012898|gb|BC048704|ens|ENSMUST00000060050		A_51_P128463	NM_001099296	ref|Mus musculus glycine/arginine rich protein 1 (Grrp1), mRNA [NM_001099296]	Grrp1	0.0465757	4.9373	1	0.0399088	4.95098	0.856859	0.109119	7.81096	2.34282	0.427714	28.7428	9.18318
mm|chr2:172984307-172984366	ref|NM_011044|ens|ENSMUST00000136885|ens|ENSMUST00000029017|gb|AK133496		A_66_P121110	NM_011044	ref|Mus musculus phosphoenolpyruvate carboxykinase 1, cytosolic (Pck1), mRNA [NM_011044]	Pck1	0.0448392	4.75321	1	0.0361071	4.47934	0.805256	0.0496668	3.55526	1.10766	0.411125	27.628	9.16887
mm|chr15:83281275-83281216			A_30_P01021150	chr15:83266264-83294664_R	lincRNA:chr15:83266264-83294664 reverse strand	chr15:83266264-83294664_R	0.0468718	4.96868	1	0.04019	4.98586	0.857445	0.0566775	4.0571	1.2092	0.429586	28.8687	9.16514
mm|chr6:129922234-129922175	ref|NM_053152|gb|AF288381|gb|S78689|tc|NP481380		A_55_P2170349	NM_053152	ref|Mus musculus killer cell lectin-like receptor subfamily A, member 22 (Klra22), mRNA [NM_053152]	Klra22	1.7679	187.408	1	18.0895	2244.13	10.2321	18.5363	1326.87	10.4849	16.1978	1088.51	9.16214
mm|chr11:116078387-116078446	ref|NR_004853|ens|ENSMUST00000174248|ens|ENSMUST00000174177|ens|ENSMUST00000173567		A_55_P1970204	NR_004853	ref|Mus musculus cyclin-dependent kinase 3, pseudogene (Cdk3-ps), non-coding RNA [NR_004853]	Cdk3-ps	0.0465683	4.9365	1	0.0399106	4.9512	0.857034	0.0551412	3.94713	1.18409	0.426547	28.6644	9.1596
mm|chr5:53751954-53751895			A_30_P01023525	chr5:53751894-53763013_R	lincRNA:chr5:53751894-53763013 reverse strand	chr5:53751894-53763013_R	0.0438552	4.6489	1	0.0384254	4.76695	0.876188	0.0543943	3.89367	1.24032	0.401272	26.9659	9.14993
mm|chr2:129948666-129948607			A_55_P2083725	A_55_P2083725	Unknown	A_55_P2083725	0.0451556	4.78675	1	0.103273	12.8118	2.28705	0.571583	40.9152	12.6581	0.41304	27.7567	9.14703
mm|chr16:85899509-85899450	ref|NM_011782|ens|ENSMUST00000023611|gb|BC138619|gb|BC138620		A_55_P1970826	NM_011782	ref|Mus musculus a disintegrin-like and metallopeptidase (reprolysin type) with thrombospondin type 1 motif, 5 (aggrecanase-2) (Adamts5), mRNA [NM_011782]	Adamts5	1.82281	193.229	1	6.11487	758.595	3.35464	17.8441	1277.32	9.78931	16.6537	1119.15	9.13626
mm|chr6:130012096-130012037	ref|NM_001039118|ref|NM_010649|ref|NM_001252577|ens|ENSMUST00000172327		A_55_P1998006	NM_001039118	ref|Mus musculus killer cell lectin-like receptor subfamily A member 33 (Klra33), mRNA [NM_001039118]	Klra33	0.31699	33.6028	1	3.84538	477.048	12.1309	3.35081	239.858	10.5707	2.89525	194.564	9.13356
mm|chr18:4182108-4182167	ref|NM_026092|ens|ENSMUST00000025076|gb|AK006630|gb|BC048450		A_55_P2152699	NM_026092	ref|Mus musculus lysozyme-like 1 (Lyzl1), mRNA [NM_026092]	Lyzl1	0.0417651	4.42734	1	0.0363077	4.50424	0.869331	0.0517602	3.70511	1.23932	0.380777	25.5886	9.11709
mm|chr4:65018429-65018488	ref|NM_021362|ens|ENSMUST00000102859|ens|ENSMUST00000084501|gb|AK018411		A_55_P1977628	NM_021362	ref|Mus musculus pregnancy-associated plasma protein A (Pappa), mRNA [NM_021362]	Pappa	0.235594	24.9743	1	0.0669824	8.30965	0.284313	3.36513	240.884	14.2836	2.14345	144.042	9.09807
mm|chr14:51573028-51573087	ref|NM_013632|ens|ENSMUST00000048615|gb|AK049817|tc|TC1574467		A_55_P2018841	NM_013632	ref|Mus musculus purine-nucleoside phosphorylase (Pnp), mRNA [NM_013632]	Pnp	0.0503784	5.3404	1	0.0441585	5.47819	0.876537	0.0634376	4.54101	1.25922	0.458244	30.7945	9.09604
mm|chr6:29432100-29432041	ref|NM_001029985|ens|ENSMUST00000101614|ens|ENSMUST00000078112|ens|ENSMUST00000091391		A_55_P2074499	NM_001029985	ref|Mus musculus kielin/chordin-like protein (Kcp), mRNA [NM_001029985]	Kcp	0.183051	19.4044	1	0.167913	20.8309	0.917304	1.42412	101.942	7.77991	1.66113	111.629	9.07467
mm|chr6:4843274-4843333			A_30_P01021183	chr6:4841700-4847400_F	lincRNA:chr6:4841700-4847400 forward strand	chr6:4841700-4847400_F	0.0405054	4.2938	1	0.0351756	4.36379	0.868417	0.0498415	3.56777	1.23049	0.367122	24.671	9.06354
mm|chr4:88920602-88920543	ref|NM_009877|ref|NM_001040654|ens|ENSMUST00000107131|ens|ENSMUST00000030237		A_55_P2008438	NM_009877	ref|Mus musculus cyclin-dependent kinase inhibitor 2A (Cdkn2a), transcript variant 1, mRNA [NM_009877]	Cdkn2a	1.58673	168.203	1	7.1834	891.153	4.52717	13.0218	932.133	8.20671	14.3785	966.254	9.06173
mm|chr8:26454150-26454091			A_30_P01020226	chr8:26428975-26490975_R	lincRNA:chr8:26428975-26490975 reverse strand	chr8:26428975-26490975_R	0.0441701	4.68229	1	0.0383217	4.75408	0.867592	0.0544023	3.89424	1.23165	0.398434	26.7752	9.02045
mm|chr17:25018251-25018310	ref|NM_008340|ens|ENSMUST00000050714|ens|ENSMUST00000168131|ens|ENSMUST00000169038		A_51_P277088	NM_008340	ref|Mus musculus insulin-like growth factor binding protein, acid labile subunit (Igfals), mRNA [NM_008340]	Igfals	0.0552364	5.85537	1	0.0478798	5.93984	0.866816	0.078878	5.64627	1.42801	0.497585	33.4383	9.00829
mm|chr1:4896669-4896728			A_30_P01033563	chr1:4895831-4896942_F	lincRNA:chr1:4895831-4896942 forward strand	chr1:4895831-4896942_F	0.0454777	4.82089	1	0.0391955	4.86248	0.861862	0.156438	11.1982	3.43988	0.408629	27.4603	8.98527
mm|chr5:128262107-128262048	gb|AK082742|gb|BB749603|riken|C230099M17		A_66_P136064	AK082742	gb|Mus musculus 0 day neonate cerebellum cDNA, RIKEN full-length enriched library, clone:C230099M17 product:unclassifiable, full insert sequence. [AK082742]	Tmem132d	0.0546462	5.7928	1	0.0467909	5.80475	0.856252	0.064066	4.58599	1.17238	0.489097	32.8679	8.95025
mm|chr11:58672255-58672314	ref|XM_003085405|ref|XM_003085787|tc|TC1613720|nap|NAP030613-1		A_55_P2009320	XM_003085405	ref|PREDICTED: Mus musculus zinc finger protein 717-like (LOC100502966), mRNA [XM_003085405]	LOC100502966	0.0573668	6.0812	1	0.0493992	6.12833	0.861112	0.0680156	4.86871	1.18563	0.513317	34.4955	8.94799
mm|chr13:42403101-42403160	ref|NM_010104|ens|ENSMUST00000021796|gb|AK040778|gb|AK153437		A_51_P115005	NM_010104	ref|Mus musculus endothelin 1 (Edn1), mRNA [NM_010104]	Edn1	0.139136	14.7492	1	0.268778	33.3439	1.93176	1.53542	109.909	11.0354	1.243	83.5311	8.93371
mm|chr8:18691517-18691458	ref|NM_007426|ens|ENSMUST00000033846|gb|AK019860|gb|AK048622		A_51_P201982	NM_007426	ref|Mus musculus angiopoietin 2 (Angpt2), mRNA [NM_007426]	Angpt2	0.187097	19.8333	1	0.440871	54.6933	2.35638	1.75694	125.766	9.39055	1.67015	112.236	8.92668
mm|chr12:99672327-99672268	ref|NM_029911|ens|ENSMUST00000110113|gb|AK082153|gb|AK031904		A_55_P1985544	NM_029911	ref|Mus musculus potassium channel, subfamily K, member 10 (Kcnk10), mRNA [NM_029911]	Kcnk10	0.0551291	5.844	1	0.0477824	5.92776	0.866736	0.0660259	4.72628	1.19766	0.490937	32.9915	8.90523
mm|chr10:98818569-98818628	gb|AK083606|tc|TC1612550|riken|D030053L23|nap|NAP085207-1		A_55_P2204227	AK083606	gb|Mus musculus 9 days embryo whole body cDNA, RIKEN full-length enriched library, clone:D030053L23 product:unclassifiable, full insert sequence. [AK083606]	B530045E10Rik	0.0498874	5.28835	1	0.0431723	5.35584	0.865395	0.0631304	4.51902	1.26546	0.444079	29.8426	8.90163
mm|chr14:61838029-61837970	ref|NM_011892|gb|AK017325|tc|TC1600560|riken|5430420E18		A_55_P1975045	NM_011892	ref|Mus musculus sarcoglycan, gamma (dystrophin-associated glycoprotein) (Sgcg), mRNA [NM_011892]	Sgcg	0.0424893	4.50411	1	0.0375519	4.65859	0.883797	0.0526076	3.76577	1.23814	0.377969	25.3999	8.89562
mm|chr8:122813384-122813443			A_30_P01021709	chr8:122812629-122814137_F	lincRNA:chr8:122812629-122814137 forward strand	chr8:122812629-122814137_F	0.0463609	4.91452	1	0.13105	16.2577	2.82674	0.417931	29.9164	9.01472	0.410828	27.6081	8.86153
mm|chr2:108525892-108525951			A_30_P01025817	chr2:108456668-108532418_F	lincRNA:chr2:108456668-108532418 forward strand	chr2:108456668-108532418_F	0.0416185	4.4118	1	0.0626684	7.77447	1.50578	0.0515535	3.69032	1.23872	0.368278	24.7487	8.84891
mm|chr14:13989964-13989905	ref|NM_177813|gb|AK083193|ens|ENSMUST00000060526|tc|TC1592453		A_55_P2066672	NM_177813	ref|Mus musculus predicted gene 5087 (Gm5087), mRNA [NM_177813]	Gm5087	0.0677239	7.17912	1	0.0487349	6.04592	0.719612	0.066378	4.75149	0.980127	0.597756	40.1699	8.82637
mm|chr5:112225400-112225341			A_30_P01033122	chr5:112205091-112240992_R	lincRNA:chr5:112205091-112240992 reverse strand	chr5:112205091-112240992_R	0.0547335	5.80206	1	0.0445218	5.52326	0.813429	0.0644378	4.61261	1.1773	0.482436	32.4202	8.81427
mm|chr2:130216670-130216611	ref|NM_019696|ens|ENSMUST00000130533|ens|ENSMUST00000028897|gb|AK132611		A_51_P139108	NM_019696	ref|Mus musculus carboxypeptidase X 1 (M14 family) (Cpxm1), mRNA [NM_019696]	Cpxm1	1.16089	123.061	1	0.793083	98.3877	0.683165	7.19093	514.743	6.1943	10.2167	686.571	8.80068
mm|chrX:100784320-100784379			A_30_P01028325	chrX:100745320-100819322_F	lincRNA:chrX:100745320-100819322 forward strand	chrX:100745320-100819322_F	0.0461803	4.89537	1	0.0404703	5.02063	0.876354	0.0572597	4.09878	1.23992	0.406131	27.2925	8.79448
mm|chr2:67834626-67834685			A_30_P01021730	chr2:67834535-67834914_F	lincRNA:chr2:67834535-67834914 forward strand	chr2:67834535-67834914_F	0.056284	5.96642	1	0.0481215	5.96982	0.854976	0.0677799	4.85184	1.20425	0.4925	33.0965	8.75027
mm|chr17:34999634-34999575	ref|NM_013484|ens|ENSMUST00000025230|gb|AK146812|gb|M57891		A_51_P497985	NM_013484	ref|Mus musculus complement component 2 (within H-2S) (C2), mRNA [NM_013484]	C2	1.18726	125.857	1	3.53565	438.623	2.97798	7.77023	556.21	6.54465	10.3845	697.85	8.74658
mm|chr15:101334299-101334358	ref|NR_002872		A_55_P1971866	NR_002872	ref|Mus musculus predicted gene 6042 (Gm6042), non-coding RNA [NR_002872]	Gm6042	0.0406159	4.30552	1	0.0536787	6.65923	1.32162	0.0500362	3.5817	1.23194	0.355058	23.8603	8.74185
mm|chr11:119322624-119322565	gb|AK041735|gb|BC075659|tc|TC1608485|riken|A630033C17		A_55_P2292608	AK041735	gb|Mus musculus 3 days neonate thymus cDNA, RIKEN full-length enriched library, clone:A630033C17 product:unclassifiable, full insert sequence. [AK041735]	A930037H05Rik	0.0447076	4.73926	1	0.0767491	9.52128	1.71669	0.277084	19.8343	6.19769	0.389317	26.1625	8.70806
mm|chr10:106370663-106370604	gb|AK045415|tc|TC1602838|riken|B230114P17|nap|NAP076528-1		A_55_P2340448	AK045415	gb|Mus musculus adult male corpora quadrigemina cDNA, RIKEN full-length enriched library, clone:B230114P17 product:unclassifiable, full insert sequence. [AK045415]	B230114P17Rik	0.0698061	7.39985	1	0.174084	21.5964	2.49382	0.637033	45.6003	9.12575	0.607062	40.7952	8.6964
mm|chr8:93340692-93340751			A_30_P01021031	chr8:93337794-93348869_F	lincRNA:chr8:93337794-93348869 forward strand	chr8:93337794-93348869_F	0.0571408	6.05725	1	0.0867025	10.7561	1.51735	0.124564	8.91659	2.17995	0.495214	33.2789	8.66655
mm|chr17:88001964-88001905	gb|BE652559		A_55_P2133375	BE652559	gb|UI-M-AQ1-ady-c-08-0-UI.r1 NIH_BMAP_MHI_N Mus musculus cDNA clone UI-M-AQ1-ady-c-08-0-UI 5'. [BE652559]	BE652559	0.0560696	5.9437	1	0.0481703	5.97588	0.859116	0.128165	9.17433	2.28582	0.484901	32.5859	8.6482
mm|chr7:003629992-003630051			A_55_P1973110	A_55_P1973110	Unknown	A_55_P1973110	0.0456703	4.84132	1	0.0399785	4.95962	0.875371	0.0570403	4.08307	1.24896	0.393821	26.4652	8.62312
mm|chr7:19443884-19443943	ref|NM_153761|ref|NM_153760|ens|ENSMUST00000072415|ens|ENSMUST00000072386		A_51_P231549	NM_153761	ref|Mus musculus MHC I like leukocyte 2 (Mill2), transcript variant 1, mRNA [NM_153761]	Mill2	0.0475114	5.03648	1	0.367099	45.5413	7.72655	0.350771	25.109	7.38289	0.40942	27.5135	8.61731
mm|chr7:33612947-33612888	ref|XM_001004117|ref|XM_001004121|ref|XM_892661|ref|XM_001004120		A_55_P2002876	XM_001004117	ref|PREDICTED: Mus musculus predicted gene 6504, transcript variant 3 (Gm6504), mRNA [XM_001004117]	Gm6504	0.0499609	5.29614	1	0.0438207	5.43627	0.877099	0.0628664	4.50012	1.25831	0.428968	28.8271	8.58607
mm|chr9:107583892-107583833	ref|NM_011349|ens|ENSMUST00000038162|ens|ENSMUST00000080560|gb|AK053632		A_55_P1998442	NM_011349	ref|Mus musculus sema domain, immunoglobulin domain (Ig), short basic domain, secreted, (semaphorin) 3F (Sema3f), mRNA [NM_011349]	Sema3f	0.569402	60.3599	1	1.01288	125.655	1.77885	7.04832	504.535	12.3785	4.87968	327.92	8.56983
mm|chr4:116886165-116886106	ref|NM_001145637|ens|ENSMUST00000165128|gb|AK005894|ens|ENSMUST00000141554		A_52_P287313	NM_001145637	ref|Mus musculus predicted gene 1661 (Gm1661), transcript variant 1, mRNA [NM_001145637]	Gm1661	0.0478943	5.07707	1	0.0413949	5.13534	0.864297	0.0558394	3.99711	1.16589	0.408742	27.4679	8.53425
mm|chr15:10259066-10259125	ref|NM_011169|ens|ENSMUST00000005400|ens|ENSMUST00000124470|gb|BC005555		A_66_P139387	NM_011169	ref|Mus musculus prolactin receptor (Prlr), transcript variant 1, mRNA [NM_011169]	Prlr	0.0507953	5.3846	1	0.23268	28.8657	4.58074	0.0797878	5.71139	1.57077	0.432427	29.0596	8.51312
mm|chr16:33663425-33663484	ref|NM_134251|ref|NM_001083902|ens|ENSMUST00000121925|ens|ENSMUST00000059056		A_55_P2022895	NM_134251	ref|Mus musculus solute carrier family 12 (potassium/chloride transporters), member 8 (Slc12a8), transcript variant 1, mRNA [NM_134251]	Slc12a8	0.0546046	5.7884	1	0.180469	22.3885	3.30501	0.347269	24.8583	6.3597	0.464263	31.199	8.50226
mm|chr1:121487378-121487319	gb|AK044967|tc|TC1616818|riken|B130016K02		A_55_P2330822	AK044967	gb|Mus musculus 9.5 days embryo parthenogenote cDNA, RIKEN full-length enriched library, clone:B130016K02 product:unclassifiable, full insert sequence. [AK044967]	AU019278	0.0501784	5.3192	1	0.0815064	10.1115	1.62433	0.361287	25.8617	7.20005	0.425606	28.6012	8.48184
mm|chr7:110132887-110132828	ref|NM_147115|ens|ENSMUST00000056235|gb|BC140457|gb|BC148706		A_51_P240508	NM_147115	ref|Mus musculus olfactory receptor 578 (Olfr578), mRNA [NM_147115]	Olfr578	0.0403553	4.27789	1	0.114487	14.2029	2.83698	0.187444	13.4177	4.64485	0.340562	22.8862	8.4391
mm|chr1:141836230-141836171			A_55_P2041693	A_55_P2041693	Unknown	A_55_P2041693	0.0508575	5.39118	1	0.0445854	5.53114	0.876674	0.354758	25.3944	6.97554	0.428063	28.7663	8.41691
mm|chr6:37892347-37892406	gb|AK018532|tc|TC1604848|riken|9030601B04		A_55_P2371281	AK018532	gb|Mus musculus adult male colon cDNA, RIKEN full-length enriched library, clone:9030601B04 product:unclassifiable, full insert sequence. [AK018532]	9030601B04Rik	0.0507628	5.38115	1	0.0875435	10.8604	1.72456	0.130659	9.35285	2.57391	0.427227	28.7101	8.41615
mm|chr18:60407406-60407465	ref|NM_001033767|ens|ENSMUST00000031549|gb|AK149583|tc|TC1587716		A_55_P2133195	NM_001033767	ref|Mus musculus predicted gene 4951 (Gm4951), mRNA [NM_001033767]	Gm4951	0.0824259	8.73762	1	0.0492893	6.11469	0.597982	0.617647	44.2125	7.49335	0.692272	46.5215	8.39872
mm|chr7:116599186-116598741	ref|NM_181853|ref|NM_001170912|ref|NM_001170913|gb|AY572454		A_52_P196979	NM_181853	ref|Mus musculus tripartite motif-containing 66 (Trim66), transcript variant 2, mRNA [NM_181853]	Trim66	0.0524474	5.55973	1	0.0454307	5.63601	0.866214	0.0626854	4.48716	1.1952	0.439724	29.5499	8.38409
mm|chr5:101001224-101001165	ref|NM_139198|ens|ENSMUST00000031264|gb|AJ422151|gb|AK007369		A_55_P1962304	NM_139198	ref|Mus musculus placenta-specific 8 (Plac8), mRNA [NM_139198]	Plac8	0.380482	40.3333	1	0.538982	66.8647	1.41658	3.08891	221.111	8.11842	3.17661	213.472	8.34891
mm|chr12:53671347-53671406			A_30_P01029904	chr12:53669634-53672010_F	lincRNA:chr12:53669634-53672010 forward strand	chr12:53669634-53672010_F	0.0470563	4.98823	1	0.0404014	5.01208	0.858576	0.0552897	3.95776	1.17497	0.391804	26.3297	8.32629
mm|chr2:89033316-89033257	ref|NM_146967|ens|ENSMUST00000099790|gb|BC106781|gb|BC106782		A_55_P2168178	NM_146967	ref|Mus musculus olfactory receptor 1226 (Olfr1226), mRNA [NM_146967]	Olfr1226	0.0486434	5.15648	1	0.0378177	4.69157	0.777448	0.0529367	3.78933	1.08826	0.403544	27.1186	8.29595
mm|chr7:27918570-27918629	ref|NM_007817|ens|ENSMUST00000003100|gb|M77497|gb|BC024742		A_51_P453909	NM_007817	ref|Mus musculus cytochrome P450, family 2, subfamily f, polypeptide 2 (Cyp2f2), mRNA [NM_007817]	Cyp2f2	0.0594502	6.30206	1	0.0510223	6.32968	0.858236	0.638319	45.6923	10.737	0.492332	33.0853	8.28142
mm|chr1:10315005-10314946	ref|NM_177834|ens|ENSMUST00000035577|ens|ENSMUST00000153695|gb|AY773477		A_51_P390038	NM_177834	ref|Mus musculus carboxypeptidase A6 (Cpa6), mRNA [NM_177834]	Cpa6	0.051806	5.49173	1	0.217624	26.9978	4.20074	0.408318	29.2283	7.88168	0.428397	28.7888	8.26927
mm|chr16:085899449-085899390			A_55_P1970825	A_55_P1970825	Unknown	A_55_P1970825	2.17919	231.006	1	6.66077	826.317	3.05654	22.2743	1594.44	10.2214	17.9627	1207.11	8.24283
mm|chr6:114254853-114254912	ref|NM_178703|ens|ENSMUST00000112994|ens|ENSMUST00000032454|gb|AK053798		A_55_P2000613	NM_178703	ref|Mus musculus solute carrier family 6 (neurotransmitter transporter, GABA), member 1 (Slc6a1), mRNA [NM_178703]	Slc6a1	0.070575	7.48135	1	0.164749	20.4383	2.33438	0.341693	24.4592	4.84157	0.580283	38.9956	8.22221
mm|chr18:46652895-46652954			A_30_P01022137	chr18:46646048-46659873_F	lincRNA:chr18:46646048-46659873 forward strand	chr18:46646048-46659873_F	0.0409524	4.34119	1	0.0361423	4.48372	0.882545	0.0506331	3.62443	1.23639	0.335135	22.5214	8.18352
mm|chr1:196445749-196445690			A_30_P01031789	chr1:196445304-196445818_R	lincRNA:chr1:196445304-196445818 reverse strand	chr1:196445304-196445818_R	0.123008	13.0396	1	0.207542	25.7471	1.68722	0.23605	16.897	1.91897	1.00532	67.5586	8.17278
mm|chr9:58311567-58311508			A_30_P01018140	chr9:58301467-58323783_R	lincRNA:chr9:58301467-58323783 reverse strand	chr9:58301467-58323783_R	0.0814106	8.62999	1	0.0948496	11.7668	1.16508	0.0866689	6.20395	1.06459	0.665318	44.7101	8.17237
mm|chr4:83510480-83510539	ref|NM_001081012|ens|ENSMUST00000053414|ens|ENSMUST00000145560|gb|BC039810		A_55_P2051879	NM_001081012	ref|Mus musculus RIKEN cDNA 4930473A06 gene (4930473A06Rik), mRNA [NM_001081012]	4930473A06Rik	0.135574	14.3717	1	0.0448425	5.56303	0.330759	0.0604006	4.32361	0.445516	1.10418	74.2019	8.14443
mm|chr5:108260724-108260783	ref|NR_003639|gb|BC050749|gb|AK133385|gb|AV284152		A_55_P2049398	NR_003639	ref|Mus musculus RIKEN cDNA 1700013N18 gene (1700013N18Rik), non-coding RNA [NR_003639]	1700013N18Rik	0.0436077	4.62266	1	0.0375684	4.66063	0.861508	0.0845657	6.0534	1.93924	0.355092	23.8626	8.14289
mm|chr16:33663232-33663291	ref|NM_134251|ref|NM_001083902|ens|ENSMUST00000121925|ens|ENSMUST00000059056		A_55_P2022890	NM_134251	ref|Mus musculus solute carrier family 12 (potassium/chloride transporters), member 8 (Slc12a8), transcript variant 1, mRNA [NM_134251]	Slc12a8	0.0524258	5.55744	1	0.283525	35.1733	5.40811	0.344441	24.6559	6.57007	0.425166	28.5716	8.10985
mm|chr8:40134535-40134476			A_30_P01020454	chr8:40100925-40196350_R	lincRNA:chr8:40100925-40196350 reverse strand	chr8:40100925-40196350_R	0.0589159	6.24542	1	0.0639489	7.93333	1.08543	0.16452	11.7767	2.79246	0.476691	32.0341	8.09104
mm|chr9:111297703-111297762	ref|NM_001164659|ens|ENSMUST00000078626|gb|BC086653|gb|AK129119		A_51_P508115	NM_001164659	ref|Mus musculus tetratricopeptide repeat and ankyrin repeat containing 1 (Trank1), mRNA [NM_001164659]	Trank1	0.0511283	5.4199	1	0.152121	18.8717	2.97528	0.444923	31.8486	8.70208	0.413264	27.7718	8.08287
mm|chr8:26925460-26925519	ref|NM_011485|ens|ENSMUST00000084024|gb|BC060970|gb|AK054470		A_52_P165654	NM_011485	ref|Mus musculus steroidogenic acute regulatory protein (Star), nuclear gene encoding mitochondrial protein, mRNA [NM_011485]	Star	0.153898	16.3141	1	0.102899	12.7654	0.668619	0.378638	27.1038	2.46032	1.24385	83.5878	8.08228
mm|chr5:149755169-149755110			A_30_P01018012	chr5:149751979-149808240_R	lincRNA:chr5:149751979-149808240 reverse strand	chr5:149751979-149808240_R	0.0552486	5.85667	1	0.999046	123.939	18.0827	0.306674	21.9524	5.5508	0.446228	29.987	8.07673
mm|chr14:104012445-104012504	ref|NM_022886|ens|ENSMUST00000110760|ens|ENSMUST00000095576|nap|NAP098889-001		A_55_P1983858	NM_022886	ref|Mus musculus sciellin (Scel), mRNA [NM_022886]	Scel	0.0530766	5.62642	1	0.524532	65.0721	9.88256	0.231223	16.5515	4.3564	0.428289	28.7815	8.06926
mm|chr11:31594809-31594868			A_30_P01020860	chr11:31594719-31595201_F	lincRNA:chr11:31594719-31595201 forward strand	chr11:31594719-31595201_F	0.0608446	6.44988	1	0.0397802	4.93503	0.6538	0.18565	13.2893	3.05122	0.490511	32.9629	8.0617
mm|chr14:66703273-66703214	ref|NM_007940|ens|ENSMUST00000070515|ens|ENSMUST00000111128|gb|AY098585		A_55_P2002572	NM_007940	ref|Mus musculus epoxide hydrolase 2, cytoplasmic (Ephx2), mRNA [NM_007940]	Ephx2	0.898678	95.265	1	3.33748	414.039	3.71377	6.79989	486.751	7.56655	7.23552	486.235	8.05129
mm|chr11:69110964-69110905			A_30_P01025569	chr11:69106907-69112857_R	lincRNA:chr11:69106907-69112857 reverse strand	chr11:69106907-69112857_R	0.0471523	4.99842	1	0.04043	5.01564	0.857434	0.0574194	4.11021	1.21774	0.378819	25.457	8.03394
mm|chr13:42403101-42403160	ref|NM_010104|ens|ENSMUST00000021796|gb|AK040778|gb|AK153437		A_51_P115005	NM_010104	ref|Mus musculus endothelin 1 (Edn1), mRNA [NM_010104]	Edn1	0.160881	17.0543	1	0.332617	41.2635	2.06747	1.94382	139.143	12.0823	1.28947	86.654	8.01505
mm|chr1:75363404-75363629	ref|NM_010043|gb|L22550|gb|AK131922|gb|BC031760		A_51_P335969	NM_010043	ref|Mus musculus desmin (Des), mRNA [NM_010043]	Des	0.0464551	4.92451	1	0.035059	4.34933	0.754686	0.132036	9.45145	2.84223	0.372264	25.0165	8.0134
mm|chr1:95908056-95908115	ref|NM_001039219|ens|ENSMUST00000097632|gb|AK145447|tc|TC1592667		A_55_P1969406	NM_001039219	ref|Mus musculus predicted gene 6086 (Gm6086), mRNA [NM_001039219]	Gm6086	0.0500618	5.30684	1	0.0438955	5.44555	0.876825	0.06295	4.5061	1.25744	0.400254	26.8975	7.99519
mm|chr7:91300761-91300820			A_30_P01024014	chr7:91300649-91302183_F	lincRNA:chr7:91300649-91302183 forward strand	chr7:91300649-91302183_F	0.0807263	8.55745	1	0.0819721	10.1692	1.01543	0.107931	7.72592	1.337	0.644827	43.3331	7.98781
mm|chr4:9843698-9843639	ref|NR_004448|gb|AK015422|gb|AK005798|tc|TC1599895		A_52_P397184	NR_004448	ref|Mus musculus RIKEN cDNA 4930448K20 gene (4930448K20Rik), non-coding RNA [NR_004448]	4930448K20Rik	0.0482078	5.1103	1	0.0416282	5.16428	0.863516	0.0597855	4.27958	1.24016	0.384741	25.855	7.98089
mm|chr3:65740814-65740873			A_30_P01025791	chr3:65740585-65741001_F	lincRNA:chr3:65740585-65741001 forward strand	chr3:65740585-65741001_F	0.0599903	6.35931	1	0.0603769	7.4902	1.00645	0.378197	27.0722	6.30431	0.478697	32.169	7.97958
mm|chr17:15368372-15368313			A_30_P01020212	chr17:15357376-15385701_R	lincRNA:chr17:15357376-15385701 reverse strand	chr17:15357376-15385701_R	0.550122	58.3161	1	0.799153	99.1408	1.45268	1.58901	113.745	2.88847	4.38207	294.48	7.96563
mm|chr2:120986576-120986517	ref|NM_178889|ens|ENSMUST00000163766|ens|ENSMUST00000079024|ens|ENSMUST00000110661		A_55_P2001459	NM_178889	ref|Mus musculus zinc finger SCAN domains 29 (Zscan29), mRNA [NM_178889]	Zscan29	0.053266	5.6465	1	0.0465129	5.77026	0.873219	0.0628346	4.49784	1.17964	0.424256	28.5105	7.96485
mm|chr6:120980718-120980777	gb|AK042438|tc|TC1593591|riken|A630091L03|nap|NAP081983-1		A_66_P113141	AK042438	gb|Mus musculus 3 days neonate thymus cDNA, RIKEN full-length enriched library, clone:A630091L03 product:hypothetical protein, full insert sequence. [AK042438]	Gm9878	0.0597292	6.33164	1	0.186979	23.1961	3.13044	0.112113	8.02531	1.87702	0.474452	31.8837	7.94339
mm|chr7:109727902-109727961	ref|NM_147104|ens|ENSMUST00000098225|gb|BC116960|gb|BC116964		A_55_P2111100	NM_147104	ref|Mus musculus olfactory receptor 550 (Olfr550), mRNA [NM_147104]	Olfr550	0.0674704	7.15224	1	0.0431559	5.35381	0.639628	0.0596399	4.26916	0.883943	0.534472	35.9171	7.92158
mm|chr6:114267064-114267123	ref|NM_178703|ens|ENSMUST00000032454|gb|AK053883|gb|AK042956		A_51_P153368	NM_178703	ref|Mus musculus solute carrier family 6 (neurotransmitter transporter, GABA), member 1 (Slc6a1), mRNA [NM_178703]	Slc6a1	0.0482042	5.10992	1	0.041642	5.166	0.863867	0.0597841	4.27948	1.24022	0.380634	25.579	7.89627
mm|chr2:156680039-156680096	ref|NM_173396|gb|AK207161|gb|AK182450|gb|AK219913		A_55_P2074887	NM_173396	ref|Mus musculus TGFB-induced factor homeobox 2 (Tgif2), mRNA [NM_173396]	Tgif2	0.0503812	5.34069	1	0.0426662	5.29305	0.846867	0.0757995	5.4259	1.50452	0.397802	26.7327	7.89585
mm|chr10:59831980-59832039	ref|NM_028732|ref|NM_001159572|ens|ENSMUST00000020301|gb|AK170059		A_55_P2115136	NM_028732	ref|Mus musculus RIKEN cDNA 4632428N05 gene (4632428N05Rik), transcript variant 1, mRNA [NM_028732]	4632428N05Rik	0.217294	23.0344	1	0.32908	40.8248	1.51445	1.76024	126.002	8.10073	1.71195	115.045	7.8785
mm|chr19:9158256-9158197	ref|NM_011681|ens|ENSMUST00000025554|gb|X67702|gb|AK145844		A_51_P128575	NM_011681	ref|Mus musculus secretoglobin, family 1A, member 1 (uteroglobin) (Scgb1a1), mRNA [NM_011681]	Scgb1a1	0.0644265	6.82957	1	0.0469364	5.8228	0.728527	0.413607	29.6069	6.41983	0.506434	34.0329	7.86065
mm|chr5:100982856-100982797	ref|NM_139198|ens|ENSMUST00000112910|ens|ENSMUST00000097437|ens|ENSMUST00000031264		A_55_P1962305	NM_139198	ref|Mus musculus placenta-specific 8 (Plac8), mRNA [NM_139198]	Plac8	6.993	741.298	1	9.21138	1142.74	1.31723	58.2206	4167.56	8.32555	54.915	3690.35	7.85286
mm|chr7:5361595-5361536	ref|NM_030739|ens|ENSMUST00000108569|gb|AF324869|nap|NAP004115-001		A_51_P123510	NM_030739	ref|Mus musculus vomeronasal 1 receptor 58 (Vmn1r58), mRNA [NM_030739]	Vmn1r58	0.0520516	5.51776	1	0.0785612	9.74608	1.50929	0.0700159	5.0119	1.34513	0.4077	27.3979	7.83262
mm|chr13:84411895-84411954	ens|ENSMUST00000050885		A_55_P1987665	ENSMUST00000050885	ens|transmembrane protein 161B [Source:MGI Symbol;Acc:MGI:1919995] [ENSMUST00000050885]	Tmem161b	0.151289	16.0375	1	0.216799	26.8955	1.43301	0.328474	23.5129	2.17116	1.18452	79.6008	7.82947
mm|chr16:85795103-85795044	ref|NM_009621|ens|ENSMUST00000023610|gb|D67076|gb|BC040382		A_52_P489295	NM_009621	ref|Mus musculus a disintegrin-like and metallopeptidase (reprolysin type) with thrombospondin type 1 motif, 1 (Adamts1), mRNA [NM_009621]	Adamts1	8.38253	888.596	1	16.0905	1996.14	1.91952	60.9264	4361.25	7.26826	65.5868	4407.5	7.82422
mm|chr13:18046673-18046732	gb|AK044624|gb|BB280757|tc|TC1611116|riken|A930027P06		A_55_P2338776	AK044624	gb|Mus musculus adult retina cDNA, RIKEN full-length enriched library, clone:A930027P06 product:unclassifiable, full insert sequence. [AK044624]	A930027P06Rik	0.0422976	4.48379	1	0.0373267	4.63065	0.882478	0.0523474	3.74715	1.2376	0.330246	22.1929	7.80768
mm|chr2:162619343-162619402			A_66_P102110	A_66_P102110	Unknown	A_66_P102110	0.051544	5.46396	1	0.0443253	5.49887	0.859951	0.066545	4.76344	1.29103	0.402303	27.0352	7.80503
mm|chr10:94134835-94134776			A_30_P01027597	chr10:94133769-94151321_R	lincRNA:chr10:94133769-94151321 reverse strand	chr10:94133769-94151321_R	0.0519835	5.51055	1	0.0445878	5.53144	0.857729	0.11188	8.00863	2.15222	0.405603	27.257	7.80253
mm|chr16:4538276-4538335			A_30_P01027175	chr16:4525147-4542122_F	lincRNA:chr16:4525147-4542122 forward strand	chr16:4525147-4542122_F	0.0563904	5.97771	1	0.0487188	6.04392	0.863954	0.0673655	4.82217	1.19463	0.439926	29.5635	7.80143
mm|chr9:51908912-51908853			A_30_P01018278	chr9:51905865-51911474_R	lincRNA:chr9:51905865-51911474 reverse strand	chr9:51905865-51911474_R	0.0445039	4.71766	1	0.0384706	4.77256	0.864432	0.052057	3.72635	1.16972	0.346795	23.305	7.79247
mm|chr1:166985650-166985591			A_30_P01017814	chr1:166985480-166986024_R	lincRNA:chr1:166985480-166986024 reverse strand	chr1:166985480-166986024_R	0.0560115	5.93754	1	0.0474518	5.88674	0.847179	0.716609	51.2965	12.794	0.435816	29.2873	7.78084
mm|chr6:43424230-43424289	gb|AK034646|riken|9430018G01		A_55_P2211457	AK034646	gb|Mus musculus 12 days embryo embryonic body between diaphragm region and neck cDNA, RIKEN full-length enriched library, clone:9430018G01 product:unclassifiable, full insert sequence. [AK034646]	9430018G01Rik	0.0434244	4.60324	1	0.0438019	5.43394	1.00869	0.0687518	4.92141	1.58325	0.337397	22.6734	7.76974
mm|chr6:8440206-8440147	gb|AK039608|gb|AK039954|tc|TC1606948|riken|A430035B10		A_52_P467519	AK039608	gb|Mus musculus adult male spinal cord cDNA, RIKEN full-length enriched library, clone:A330071G13 product:unclassifiable, full insert sequence. [AK039608]	A430035B10Rik	0.0491996	5.21544	1	0.0431336	5.35103	0.876705	0.1119	8.01007	2.27441	0.381827	25.6592	7.76077
mm|chr11:58036093-58036152	ref|NM_019440|ens|ENSMUST00000108836|ens|ENSMUST00000058704|gb|AK142291		A_55_P2137611	NM_019440	ref|Mus musculus immunity-related GTPase family M member 2 (Irgm2), mRNA [NM_019440]	Irgm2	0.327723	34.7406	1	0.449022	55.7045	1.37013	3.16742	226.731	9.66493	2.54027	170.709	7.75127
mm|chrX:133511361-133511302	ref|NM_001081983|ref|NM_207267|ens|ENSMUST00000113071|ens|ENSMUST00000127404		A_55_P2008895	NM_001081983	ref|Mus musculus thymosin beta 15b1 (Tmsb15b1), mRNA [NM_001081983]	Tmsb15b1	0.124693	13.2182	1	0.327001	40.5668	2.62245	0.936424	67.0314	7.50984	0.965618	64.8906	7.74396
mm|chr17:54413767-54413708	ref|NM_022025|ens|ENSMUST00000095712|gb|AK034415|gb|BC065089		A_55_P2142818	NM_022025	ref|Mus musculus solute carrier family 5 (choline transporter), member 7 (Slc5a7), mRNA [NM_022025]	Slc5a7	0.0536667	5.68898	1	0.2905	36.0386	5.41304	0.661491	47.351	12.3259	0.415076	27.8936	7.73434
mm|chr15:97864981-97865040			A_30_P01029872	chr15:97856041-97867907_F	lincRNA:chr15:97856041-97867907 forward strand	chr15:97856041-97867907_F	0.0441667	4.68192	1	0.0385415	4.78136	0.872638	0.0759141	5.4341	1.71881	0.34158	22.9545	7.73388
mm|chr1:75363404-75363629	ref|NM_010043|gb|L22550|gb|AK131922|gb|BC031760		A_51_P335969	NM_010043	ref|Mus musculus desmin (Des), mRNA [NM_010043]	Des	0.0456729	4.84158	1	0.0410066	5.08716	0.897832	0.105989	7.58693	2.32061	0.353193	23.735	7.73311
mm|chr7:97000413-97000472	ref|NM_181407|ens|ENSMUST00000032856|ens|ENSMUST00000107241|gb|AK006146		A_55_P1953919	NM_181407	ref|Mus musculus malic enzyme 3, NADP(+)-dependent, mitochondrial (Me3), nuclear gene encoding mitochondrial protein, mRNA [NM_181407]	Me3	0.159297	16.8864	1	0.701741	87.0561	4.40525	1.08707	77.8147	6.82417	1.23157	82.7627	7.73128
mm|chr13:64044932-64044873			A_30_P01033629	chr13:64044376-64045368_R	lincRNA:chr13:64044376-64045368 reverse strand	chr13:64044376-64045368_R	0.167681	17.7752	1	0.261456	32.4355	1.55924	0.489104	35.0112	2.91686	1.29407	86.9628	7.71742
mm|chr5:53462121-53462180	ref|NM_011402|ens|ENSMUST00000094787|gb|AF081499|gb|AK145599		A_51_P221256	NM_011402	ref|Mus musculus solute carrier family 34 (sodium phosphate), member 2 (Slc34a2), mRNA [NM_011402]	Slc34a2	0.0407714	4.322	1	0.0355236	4.40696	0.871286	0.0503893	3.60698	1.2359	0.314208	21.1151	7.70658
mm|chr8:24559438-24559497	ref|NM_013834|ens|ENSMUST00000033952|gb|AK008943|gb|BC094662		A_66_P134428	NM_013834	ref|Mus musculus secreted frizzled-related protein 1 (Sfrp1), mRNA [NM_013834]	Sfrp1	0.935691	99.1886	1	1.34637	167.027	1.43891	6.83938	489.578	7.30945	7.18898	483.108	7.68307
mm|chr6:90425144-90425203	ref|NM_023184|ens|ENSMUST00000113530|ens|ENSMUST00000032174|gb|AK009739		A_55_P2022049	NM_023184	ref|Mus musculus Kruppel-like factor 15 (Klf15), mRNA [NM_023184]	Klf15	0.0925352	9.80926	1	0.116982	14.5125	1.26419	0.719864	51.5295	7.77936	0.708249	47.5951	7.65383
mm|chr11:78828362-78828303	ref|NM_013571|gb|U43585|tc|TC1586210|nap|NAP100104-001		A_55_P1973238	NM_013571	ref|Mus musculus kinase suppressor of ras 1 (Ksr1), mRNA [NM_013571]	Ksr1	0.174834	18.5334	1	0.122827	15.2376	0.702534	0.307431	22.0066	1.75841	1.33457	89.6845	7.63334
mm|chr8:107479803-107479862	ref|NM_001079865|ens|ENSMUST00000109407|ens|ENSMUST00000076384|gb|BC117742		A_55_P2101536	NM_001079865	ref|Mus musculus carboxylesterase 2F (Ces2f), mRNA [NM_001079865]	Ces2f	0.0480261	5.09104	1	0.0414355	5.14037	0.862771	0.243025	17.3962	5.06027	0.366494	24.6288	7.63115
mm|chr12:116745995-116745936	ens|ENSMUST00000103535|gb|AF296427|gb|U09599|gb|EF063579		A_51_P513776	ENSMUST00000103535	ens|predicted gene, 16865 [Source:MGI Symbol;Acc:MGI:4439789] [ENSMUST00000103535]	ENSMUST00000103535	0.0951098	10.0822	1	0.121626	15.0885	1.27879	0.449935	32.2074	4.7307	0.725789	48.7739	7.63107
mm|chr5:15029343-15029284	ref|NM_182957|ref|NM_198666|ref|NM_001122661|ref|NM_025759		A_55_P2041141	NM_182957	ref|Mus musculus predicted gene 17019 (Gm17019), mRNA [NM_182957]	Gm17019	0.0410136	4.34767	1	0.0695024	8.62228	1.69462	0.0507351	3.63174	1.23703	0.31229	20.9862	7.6143
mm|chr10:114807802-114807743	ref|NM_025780|ens|ENSMUST00000020346|gb|AK081303|riken|C130002K22		A_52_P653932	NM_025780	ref|Mus musculus THAP domain containing, apoptosis associated protein 2 (Thap2), mRNA [NM_025780]	Thap2	0.0705595	7.47971	1	0.0459158	5.69619	0.65074	0.187849	13.4467	2.66228	0.53674	36.0695	7.60692
mm|chr13:54431337-54431278			A_30_P01023147	chr13:54399275-54445825_R	lincRNA:chr13:54399275-54445825 reverse strand	chr13:54399275-54445825_R	0.0557328	5.90799	1	0.117391	14.5632	2.10632	0.512948	36.718	9.2037	0.423427	28.4548	7.59745
mm|chr7:20281791-20281732	ref|NM_009696|ens|ENSMUST00000173739|ens|ENSMUST00000003066|ens|ENSMUST00000174355		A_51_P171999	NM_009696	ref|Mus musculus apolipoprotein E (Apoe), mRNA [NM_009696]	Apoe	1.27198	134.837	1	5.91197	733.423	4.64785	7.32941	524.656	5.76221	9.64688	648.281	7.58414
mm|chr13:21596487-21596428	ref|NR_026798|gb|AK132930|riken|4930521G09|nap|NAP014220-001		A_55_P2200780	NR_026798	ref|Mus musculus zinc finger protein 389 (Zfp389), non-coding RNA [NR_026798]	Zfp389	0.0987326	10.4662	1	0.0654011	8.11348	0.662406	0.0658222	4.7117	0.666671	0.748345	50.2896	7.57951
mm|chr10:60643260-60643319	ref|NM_001017441|ref|NM_023064|ref|NM_001017409|ref|NM_001017407		A_51_P514584	NM_001017441	ref|Mus musculus thymus, brain and testes associated (Tbata), transcript variant 4, mRNA [NM_001017441]	Tbata	0.0480248	5.0909	1	0.0414638	5.14388	0.863382	0.0732137	5.2408	1.5245	0.362778	24.3791	7.55398
mm|chr12:70638167-70638108			A_30_P01027913	chr12:70637975-70638314_R	lincRNA:chr12:70637975-70638314 reverse strand	chr12:70637975-70638314_R	0.0527415	5.5909	1	0.101214	12.5563	1.91905	0.15471	11.0745	2.93337	0.39784	26.7353	7.54321
mm|chr1:175576265-175576324	ref|NM_175026|ens|ENSMUST00000056071|gb|AK080371|gb|BC096384		A_55_P2035509	NM_175026	ref|Mus musculus pyrin and HIN domain family, member 1 (Pyhin1), mRNA [NM_175026]	Pyhin1	0.03956	4.19359	1	0.212537	26.3667	5.37252	0.287742	20.5972	7.27356	0.297546	19.9954	7.52139
mm|chr3:88171771-88171830	ref|NM_198410|ens|ENSMUST00000107540|ens|ENSMUST00000147991|ens|ENSMUST00000147818		A_55_P2148655	NM_198410	ref|Mus musculus progestin and adipoQ receptor family member VI (Paqr6), mRNA [NM_198410]	Paqr6	0.0529632	5.6144	1	0.265903	32.9872	5.02052	0.310381	22.2178	5.86031	0.39775	26.7292	7.50993
mm|chr10:60175710-60175651	ref|NM_023596|ens|ENSMUST00000117513		A_55_P2050495	NM_023596	ref|Mus musculus solute carrier family 29 (nucleoside transporters), member 3 (Slc29a3), mRNA [NM_023596]	Slc29a3	0.0461957	4.89701	1	0.344907	42.7882	7.46621	0.430798	30.8375	9.32551	0.346195	23.2647	7.49409
mm|chr8:128275470-128275411	ref|NM_175561|ens|ENSMUST00000047239|ens|ENSMUST00000119305|ens|ENSMUST00000151787		A_55_P2085771	NM_175561	ref|Mus musculus pecanex-like 2 (Drosophila) (Pcnxl2), transcript variant 2, mRNA [NM_175561]	Pcnxl2	0.0442909	4.69509	1	0.0384287	4.76736	0.867643	0.0545781	3.90682	1.23226	0.331787	22.2965	7.49109
mm|chr10:79327586-79327527	ref|NM_181681|ref|NR_033210|ens|ENSMUST00000166057|ens|ENSMUST00000092325		A_55_P2060991	NM_181681	ref|Mus musculus cDNA sequence BC005764 (BC005764), transcript variant 1, mRNA [NM_181681]	BC005764	0.893378	94.7031	1	0.972274	120.618	1.08831	9.2037	658.822	10.3021	6.68878	449.494	7.48707
mm|chr10:77178702-77178761	ref|NM_001205035|ref|NM_001205033|ref|NR_026831|ens|ENSMUST00000074296		A_55_P2083184	NM_001205035	ref|Mus musculus predicted gene 10142 (Gm10142), mRNA [NM_001205035]	Gm10142	0.104893	11.1192	1	0.179198	22.2308	1.7084	0.221758	15.8739	2.11414	0.785324	52.7746	7.48694
mm|chr2:36112970-36113029			A_30_P01021337	chr2:36112819-36114110_F	lincRNA:chr2:36112819-36114110 forward strand	chr2:36112819-36114110_F	0.041598	4.40963	1	0.146569	18.183	3.52347	0.0865991	6.19896	2.08181	0.311335	20.922	7.48436
mm|chr13:42403101-42403160	ref|NM_010104|ens|ENSMUST00000021796|gb|AK040778|gb|AK153437		A_51_P115005	NM_010104	ref|Mus musculus endothelin 1 (Edn1), mRNA [NM_010104]	Edn1	0.167463	17.7521	1	0.262754	32.5966	1.56903	1.56035	111.693	9.31756	1.25294	84.1991	7.4819
mm|chr9:110802956-110803015	ref|NM_001146060|ref|NM_001146059|ref|NM_146228|ens|ENSMUST00000084926		A_55_P1962906	NM_001146060	ref|Mus musculus ALS2 C-terminal like (Als2cl), transcript variant 1, mRNA [NM_001146060]	Als2cl	0.269507	28.5693	1	0.903143	112.041	3.35109	1.34787	96.4836	5.00124	2.01637	135.502	7.48169
mm|chr1:74110644-74110703			A_30_P01024664	chr1:74084292-74138492_F	lincRNA:chr1:74084292-74138492 forward strand	chr1:74084292-74138492_F	0.0453709	4.80958	1	0.221828	27.5194	4.88921	0.133104	9.52786	2.93368	0.33889	22.7738	7.46932
mm|chr13:92001551-92001610	gb|AK018965|ens|ENSMUST00000122270|gb|BY707296|tc|TC1699837		A_66_P102265	AK018965	gb|Mus musculus adult male testis cDNA, RIKEN full-length enriched library, clone:1700119I11 product:unclassifiable, full insert sequence. [AK018965]	1700119I11Rik	0.0417511	4.42585	1	0.0363751	4.5126	0.871239	0.0499224	3.57356	1.19572	0.311564	20.9375	7.46243
mm|chr11:104189430-104189489	ref|NM_001038609|ref|NM_010838|ens|ENSMUST00000106989|ens|ENSMUST00000106988		A_55_P1954486	NM_001038609	ref|Mus musculus microtubule-associated protein tau (Mapt), transcript variant 1, mRNA [NM_001038609]	Mapt	0.049401	5.23678	1	0.0916295	11.3673	1.85481	0.163844	11.7283	3.31661	0.366503	24.6294	7.41894
mm|chr3:151751041-151750982			A_30_P01029095	chr3:151746091-151753763_R	lincRNA:chr3:151746091-151753763 reverse strand	chr3:151746091-151753763_R	0.0745166	7.89918	1	0.174759	21.6801	2.34524	0.127844	9.15139	1.71565	0.551224	37.0428	7.39733
mm|chr2:181419201-181420518	ref|NM_009326|ens|ENSMUST00000166017|ens|ENSMUST00000103042|ens|ENSMUST00000136145		A_51_P375667	NM_009326	ref|Mus musculus transcription elongation factor A (SII), 2 (Tcea2), mRNA [NM_009326]	Tcea2	0.0526313	5.57921	1	0.0458879	5.69273	0.871875	0.257004	18.3969	4.8831	0.389001	26.1413	7.39107
mm|chr6:147591620-147591561			A_55_P1975943	A_55_P1975943	Unknown	A_55_P1975943	0.0456872	4.8431	1	0.0397164	4.92711	0.869311	0.0566811	4.05736	1.24063	0.337027	22.6486	7.37683
mm|chr7:3813473-3813414	ref|XR_004829|gb|AK137448|riken|9830001O09		A_55_P2046143	XR_004829	ref|PREDICTED: Mus musculus predicted pseudogene 10693 (Gm10693), miscRNA [XR_004829]	Gm10693	0.052549	5.5705	1	0.0460359	5.71109	0.876056	0.149385	10.6933	2.84277	0.387492	26.0399	7.37391
mm|chr7:11594425-11594484	ref|NM_001013765|ref|NM_001100186|ref|NR_033707|ens|ENSMUST00000165848		A_52_P363843	NM_001013765	ref|Mus musculus zinc finger and SCAN domain containing 4C (Zscan4c), mRNA [NM_001013765]	Zscan4c	0.055556	5.88925	1	0.0464049	5.75687	0.835282	0.0663356	4.74845	1.19403	0.409493	27.5184	7.37082
mm|chr13:55269212-55269271	ref|NM_008011|ens|ENSMUST00000099491|ens|ENSMUST00000067171|ens|ENSMUST00000005452		A_55_P2121871	NM_008011	ref|Mus musculus fibroblast growth factor receptor 4 (Fgfr4), mRNA [NM_008011]	Fgfr4	0.137052	14.5283	1	0.197229	24.4677	1.43909	0.660483	47.2789	4.81923	1.0085	67.772	7.35851
mm|chr5:87441721-87441780	ref|NM_172881|ens|ENSMUST00000166665|gb|AK083294|gb|AK149501		A_51_P163578	NM_172881	ref|Mus musculus UDP glucuronosyltransferase 2 family, polypeptide B35 (Ugt2b35), mRNA [NM_172881]	Ugt2b35	0.0423485	4.48918	1	0.0374252	4.64287	0.883744	0.0524477	3.75433	1.23848	0.311021	20.901	7.34434
mm|chr1:34058355-34058414			A_30_P01024201	chr1:33965074-34060850_F	lincRNA:chr1:33965074-34060850 forward strand	chr1:33965074-34060850_F	0.0518935	5.50101	1	0.0498494	6.18419	0.960611	0.0625669	4.47868	1.20568	0.380543	25.5729	7.33316
mm|chr7:31075197-31075256	ens|ENSMUST00000014072|gb|AK006173|ens|ENSMUST00000108187|tc|TC1593961		A_55_P2126002	ENSMUST00000014072	ens|THAP domain containing 8 [Source:MGI Symbol;Acc:MGI:1922879] [ENSMUST00000014072]	LOC100504904	0.0512914	5.43718	1	0.0446986	5.54518	0.871463	0.0601774	4.30763	1.17324	0.375462	25.2315	7.32017
mm|chr7:111511427-111511368	ens|ENSMUST00000164410|ens|ENSMUST00000145982|ref|XM_001476227|ref|XM_003086619		A_55_P2011084	ENSMUST00000164410	ens|tripartite motif-containing 30B [Source:MGI Symbol;Acc:MGI:4821256] [ENSMUST00000164410]	LOC100046632	0.051953	5.50731	1	0.177539	22.0251	3.41731	0.319852	22.8957	6.15656	0.379786	25.522	7.31018
mm|chr13:42403101-42403160	ref|NM_010104|ens|ENSMUST00000021796|gb|AK040778|gb|AK153437		A_51_P115005	NM_010104	ref|Mus musculus endothelin 1 (Edn1), mRNA [NM_010104]	Edn1	0.167843	17.7924	1	0.207098	25.692	1.23388	1.60744	115.064	9.57701	1.22506	82.3253	7.29882
mm|chr19:9158256-9158197	ref|NM_011681|ens|ENSMUST00000025554|gb|X67702|gb|AK145844		A_51_P128575	NM_011681	ref|Mus musculus secretoglobin, family 1A, member 1 (uteroglobin) (Scgb1a1), mRNA [NM_011681]	Scgb1a1	0.0445657	4.72422	1	0.083488	10.3573	1.87337	0.238256	17.0549	5.34617	0.325236	21.8562	7.29791
mm|chr15:74627588-74627529	ref|NM_029627|ens|ENSMUST00000060301|ens|ENSMUST00000168815|gb|AK010485		A_51_P521052	NM_029627	ref|Mus musculus lymphocyte antigen 6 complex, locus K (Ly6k), mRNA [NM_029627]	Ly6k	0.0595546	6.31313	1	0.276086	34.2504	4.63584	0.533706	38.2039	8.96162	0.43459	29.2049	7.29734
mm|chr10:86955161-86955102	ref|NM_008553|ens|ENSMUST00000020243|gb|AK141866|gb|M95603		A_51_P437327	NM_008553	ref|Mus musculus achaete-scute complex homolog 1 (Drosophila) (Ascl1), mRNA [NM_008553]	Ascl1	0.138971	14.7317	1	0.153736	19.0721	1.10625	0.289556	20.7271	2.08357	1.01328	68.0934	7.29128
mm|chr14:93414880-93414821	ref|NM_001081377|ens|ENSMUST00000074766|ens|ENSMUST00000068992|gb|AY861423		A_55_P2011506	NM_001081377	ref|Mus musculus protocadherin 9 (Pcdh9), mRNA [NM_001081377]	Pcdh9	0.0484565	5.13667	1	0.0425077	5.27339	0.877233	0.105893	7.58009	2.18533	0.352865	23.7129	7.28209
mm|chrX:157038772-157038831			A_30_P01020163	chrX:157038750-157039018_F	lincRNA:chrX:157038750-157039018 forward strand	chrX:157038750-157039018_F	0.056612	6.0012	1	0.10402	12.9044	1.83742	0.260423	18.6417	4.60014	0.411615	27.661	7.27081
mm|chrX:157063622-157062535	ref|NM_011147|gb|BC148447|ens|ENSMUST00000071204|nap|NAP023261-001		A_52_P567200	NM_011147	ref|Mus musculus protein phosphatase with EF hand calcium-binding domain 1 (Ppef1), mRNA [NM_011147]	Ppef1	0.0498045	5.27956	1	0.314428	39.007	6.31324	0.456531	32.6795	9.16647	0.361767	24.3112	7.26375
mm|chr14:26261466-26261407			A_30_P01020732	chr14:26077008-26277280_R	lincRNA:chr14:26077008-26277280 reverse strand	chr14:26077008-26277280_R	0.040876	4.33309	1	0.0459317	5.69817	1.12368	0.134125	9.60094	3.28125	0.296457	19.9223	7.2526
mm|chr19:17297010-17297069	ref|NM_181348|ens|ENSMUST00000087689|gb|GQ403051|gb|AK170001		A_55_P2067316	NM_181348	ref|Mus musculus prune homolog 2 (Drosophila) (Prune2), mRNA [NM_181348]	Prune2	0.0473144	5.01559	1	0.287449	35.6601	6.0753	0.210206	15.047	4.44275	0.341953	22.9796	7.22727
mm|chr10:88917281-88917222	ref|NM_001163504|ref|NM_001163700|ref|NM_009108|ens|ENSMUST00000105296		A_55_P2369474	NM_001163504	ref|Mus musculus nuclear receptor subfamily 1, group H, member 4 (Nr1h4), transcript variant 2, mRNA [NM_001163504]	Nr1h4	0.060173	6.37869	1	0.61393	76.1625	10.2027	0.3687	26.3924	6.12733	0.433409	29.1256	7.20271
mm|chr11:59011363-59011304	ref|NR_037964|gb|AK162965|riken|A330105A21		A_55_P2205650	NR_037964	ref|Mus musculus RIKEN cDNA 2610507I01 gene (2610507I01Rik), non-coding RNA [NR_037964]	2610507I01Rik	0.542553	57.5138	1	0.558715	69.3127	1.02979	0.768099	54.9823	1.41571	3.90106	262.155	7.19018
mm|chr1:71940191-71940250			A_30_P01027939	chr1:71939741-71947891_F	lincRNA:chr1:71939741-71947891 forward strand	chr1:71939741-71947891_F	0.0577293	6.11964	1	0.0760396	9.43326	1.31717	0.152072	10.8857	2.63422	0.414887	27.8808	7.18676
mm|chrX:137600049-137599990	ref|NM_053185|ens|ENSMUST00000033629|ens|ENSMUST00000167697|ens|ENSMUST00000101205		A_52_P516409	NM_053185	ref|Mus musculus collagen, type IV, alpha 6 (Col4a6), mRNA [NM_053185]	Col4a6	0.0576794	6.11435	1	0.0499328	6.19452	0.865695	0.410345	29.3734	7.11423	0.414347	27.8446	7.18361
mm|chr11:83961931-83961872	ref|NM_001037932|ens|ENSMUST00000050771|gb|AJ844653|tc|NP1482398		A_55_P2115220	NM_001037932	ref|Mus musculus predicted gene 11437 (Gm11437), mRNA [NM_001037932]	Gm11437	0.0413903	4.38761	1	0.0360993	4.47838	0.872167	0.0496905	3.55696	1.20053	0.297147	19.9686	7.17915
mm|chr17:5831024-5831083			A_30_P01027934	chr17:5795893-5835243_F	lincRNA:chr17:5795893-5835243 forward strand	chr17:5795893-5835243_F	0.0429317	4.55101	1	0.0373721	4.63628	0.8705	1.18217	84.6224	27.5361	0.308104	20.7049	7.1766
mm|chr9:5372975-5373034	ref|NM_009808|ens|ENSMUST00000027009|gb|AK030309|tc|TC1581373		A_55_P1983853	NM_009808	ref|Mus musculus caspase 12 (Casp12), mRNA [NM_009808]	Casp12	0.0800247	8.48308	1	0.123052	15.2655	1.53767	0.516922	37.0024	6.45953	0.573977	38.5719	7.1725
mm|chr7:50408606-50408547			A_30_P01029617	chr7:50403100-50418175_R	lincRNA:chr7:50403100-50418175 reverse strand	chr7:50403100-50418175_R	0.0563799	5.97659	1	0.123375	15.3056	2.18828	0.431619	30.8963	7.65555	0.404266	27.1671	7.17039
mm|chr6:52054133-52054074			A_30_P01032591	chr6:52046805-52072744_R	lincRNA:chr6:52046805-52072744 reverse strand	chr6:52046805-52072744_R	0.0412128	4.36879	1	0.0358981	4.45342	0.871042	0.292846	20.9626	7.10571	0.294349	19.7806	7.14217
mm|chr17:84222980-84223039	gb|AK158615|gb|AK085941|ens|ENSMUST00000112344|tc|TC1603961		A_66_P114585	AK158615	gb|Mus musculus visual cortex cDNA, RIKEN full-length enriched library, clone:K230028J19 product:hypothetical protein, full insert sequence. [AK158615]	Mta3	0.0400531	4.24585	1	0.25161	31.2141	6.28193	0.335073	23.9852	8.36572	0.285921	19.2142	7.13855
mm|chr7:20281791-20281732	ref|NM_009696|ens|ENSMUST00000173739|ens|ENSMUST00000003066|ens|ENSMUST00000174355		A_51_P171999	NM_009696	ref|Mus musculus apolipoprotein E (Apoe), mRNA [NM_009696]	Apoe	1.30714	138.565	1	6.28942	780.249	4.81158	8.00837	573.257	6.12662	9.32137	626.406	7.1311
mm|chr13:42403101-42403160	ref|NM_010104|ens|ENSMUST00000021796|gb|AK040778|gb|AK153437		A_51_P115005	NM_010104	ref|Mus musculus endothelin 1 (Edn1), mRNA [NM_010104]	Edn1	0.171879	18.2202	1	0.359135	44.5533	2.08946	1.62284	116.167	9.44175	1.22443	82.2828	7.12376
mm|chr11:79327063-79327004	ref|NM_146023|ref|NM_001077496|ens|ENSMUST00000093983|ens|ENSMUST00000170422		A_52_P508999	NM_146023	ref|Mus musculus ecotropic viral integration site 2b (Evi2b), transcript variant 2, mRNA [NM_146023]	Evi2b	0.0860711	9.12403	1	0.0423137	5.24933	0.491614	0.057463	4.11333	0.667623	0.613044	41.1972	7.12253
mm|chr17:37209174-37209232	ref|NM_019439|ens|ENSMUST00000173823|ens|ENSMUST00000172792|gb|BC054735		A_51_P464900	NM_019439	ref|Mus musculus gamma-aminobutyric acid (GABA) B receptor, 1 (Gabbr1), mRNA [NM_019439]	Gabbr1	0.0516392	5.47405	1	0.136416	16.9234	2.64171	0.0609073	4.35988	1.17948	0.367766	24.7143	7.12183
mm|chr7:148155658-148155717	gb|BC090258		A_55_P2087265	BC090258	gb|Mus musculus interferon induced transmembrane protein 1, mRNA (cDNA clone MGC:102334 IMAGE:4982747), complete cds. [BC090258]	Ifitm1	0.0437188	4.63444	1	0.11546	14.3237	2.64098	0.118145	8.45707	2.70238	0.309293	20.7848	7.0746
mm|chr16:22939736-22939795	ref|NM_021564|ref|NM_001083905|ref|NM_001083904|ens|ENSMUST00000167399		A_55_P2050902	NM_021564	ref|Mus musculus fetuin beta (Fetub), transcript variant 1, mRNA [NM_021564]	Fetub	0.811892	86.0652	1	1.78849	221.875	2.20286	5.40715	387.056	6.65994	5.74237	385.894	7.07283
mm|chr2:94018479-94018538			A_30_P01023663	chr2:94008913-94019798_F	lincRNA:chr2:94008913-94019798 forward strand	chr2:94008913-94019798_F	0.042687	4.52507	1	0.0377545	4.68373	0.88445	0.0857275	6.13657	2.00828	0.301703	20.2748	7.06778
mm|chr9:9033530-9033589			A_30_P01021147	chr9:9024733-9041933_F	lincRNA:chr9:9024733-9041933 forward strand	chr9:9024733-9041933_F	0.0553302	5.86532	1	0.0711185	8.82277	1.28535	0.19432	13.9098	3.512	0.391007	26.2761	7.06678
mm|chr11:95561489-95561430	ref|NR_045780|ens|ENSMUST00000155531|gb|AK027957|gb|BB609668		A_52_P771446	NR_045780	ref|Mus musculus RIKEN cDNA 1110035M17 gene (1110035M17Rik), non-coding RNA [NR_045780]	1110035M17Rik	0.18531	19.6439	1	0.215602	26.747	1.16347	0.217831	15.5928	1.1755	1.30822	87.9136	7.05961
mm|chr19:20630483-20630542	ref|NR_015502|gb|AK087651|tc|TC1608137|riken|E230034K22		A_52_P510638	NR_015502	ref|Mus musculus RIKEN cDNA E030003E18 gene (E030003E18Rik), non-coding RNA [NR_015502]	E030003E18Rik	0.0476704	5.05334	1	0.0722555	8.96382	1.51573	0.0654828	4.6874	1.37366	0.336025	22.5813	7.04893
mm|chr3:122716527-122709486	ref|NM_021503|ens|ENSMUST00000029761|gb|AY013296|gb|AJ252148		A_51_P248638	NM_021503	ref|Mus musculus myozenin 2 (Myoz2), mRNA [NM_021503]	Myoz2	0.0642398	6.80978	1	0.130311	16.166	2.02851	0.305374	21.8593	4.75366	0.452641	30.4179	7.04611
mm|chr3:41328027-41328086			A_30_P01017820	chr3:41327493-41328368_F	lincRNA:chr3:41327493-41328368 forward strand	chr3:41327493-41328368_F	0.0456849	4.84286	1	0.039705	4.9257	0.869106	0.0596555	4.27027	1.3058	0.321785	21.6243	7.04358
mm|chr9:103111266-103111207	ref|NM_133977|ens|ENSMUST00000035158|gb|AK168368|gb|AK085754		A_55_P2037584	NM_133977	ref|Mus musculus transferrin (Trf), mRNA [NM_133977]	Trf	0.346589	36.7404	1	0.585168	72.5944	1.68836	2.99963	214.72	8.65472	2.43953	163.939	7.0387
mm|chr12:111514980-111514921	gb|AY283181		A_55_P2040476	AY283181	gb|Mus musculus type 3 deiodinase antisense (Dio3as) mRNA, partial sequence; alternatively spliced. [AY283181]	Dio3os	0.210616	22.3264	1	0.46538	57.7338	2.20962	1.31489	94.1226	6.24307	1.47676	99.2399	7.01164
mm|chr6:136781598-136781657	gb|AK147870|riken|G270073A20		A_55_P2206254	AK147870	gb|Mus musculus melanocyte cDNA, RIKEN full-length enriched library, clone:G270073A20 product:unclassifiable, full insert sequence. [AK147870]	LOC627096	0.0660233	6.99885	1	0.12388	15.3682	1.87631	0.333705	23.8873	5.05434	0.462718	31.0951	7.0084
mm|chr4:41644771-41644712	ens|ENSMUST00000068970|ens|ENSMUST00000105155|ens|ENSMUST00000165573|ref|XM_001487791		A_55_P2107437	ENSMUST00000068970	ens|predicted gene 9969 [Source:MGI Symbol;Acc:MGI:3710519] [ENSMUST00000068970]	1700045I11Rik	0.0537381	5.69655	1	0.148018	18.3628	2.75444	0.438676	31.4015	8.16322	0.376516	25.3023	7.00649
mm|chr1:175710968-175710909			A_30_P01023338	chr1:175705225-175717250_R	lincRNA:chr1:175705225-175717250 reverse strand	chr1:175705225-175717250_R	0.192089	20.3625	1	0.453184	56.2207	2.35924	1.18088	84.5303	6.14759	1.34439	90.3446	6.9988
mm|chr6:140654893-140654952			A_30_P01032431	chr6:140639450-140662200_F	lincRNA:chr6:140639450-140662200 forward strand	chr6:140639450-140662200_F	0.0840793	8.91288	1	0.0394812	4.89793	0.469571	0.0547453	3.91879	0.651115	0.587647	39.4905	6.9892
mm|chr7:20281791-20281732	ref|NM_009696|ens|ENSMUST00000173739|ens|ENSMUST00000003066|ens|ENSMUST00000174355		A_51_P171999	NM_009696	ref|Mus musculus apolipoprotein E (Apoe), mRNA [NM_009696]	Apoe	1.34908	143.01	1	6.50109	806.507	4.8189	7.7256	553.016	5.72657	9.42198	633.167	6.984
mm|chr8:96493228-96493287	ref|NM_010308|ens|ENSMUST00000034198		A_55_P2096144	NM_010308	ref|Mus musculus guanine nucleotide binding protein, alpha O (Gnao1), transcript variant A, mRNA [NM_010308]	Gnao1	0.166797	17.6815	1	0.491251	60.9433	2.9452	1.43736	102.889	8.61738	1.16426	78.2394	6.98008
mm|chr3:88181881-88181822	ref|NM_001032298|ref|NM_007541|ens|ENSMUST00000098956|ens|ENSMUST00000076048		A_55_P2106803	NM_001032298	ref|Mus musculus bone gamma-carboxyglutamate protein 2 (Bglap2), mRNA [NM_001032298]	Bglap2	0.139461	14.7836	1	0.848916	105.314	6.08714	0.619107	44.3171	4.4393	0.969686	65.164	6.95312
mm|chr3:107114858-107114917	ref|NM_146136|ens|ENSMUST00000029502|gb|AK045797|gb|AK136837		A_51_P340653	NM_146136	ref|Mus musculus solute carrier family 16 (monocarboxylic acid transporters), member 4 (Slc16a4), mRNA [NM_146136]	Slc16a4	0.0949283	10.0629	1	0.444465	55.1392	4.68212	1.50785	107.935	15.8841	0.659503	44.3193	6.94738
mm|chr1:157354223-157354164			A_55_P2132129	A_55_P2132129	Unknown	A_55_P2132129	0.04656	4.93563	1	0.0398984	4.94969	0.856924	0.665989	47.673	14.3039	0.323182	21.7182	6.94118
mm|chr4:138718185-138718244	gb|BG066474|tc|TC1636644		A_55_P2314738	BG066474	gb|H3043D08-3 NIA Mouse 15K cDNA Clone Set Mus musculus cDNA clone H3043D08 3', mRNA sequence [BG066474]	C79562	0.0546182	5.78984	1	0.0768391	9.53245	1.40684	0.4487	32.119	8.21521	0.37885	25.4591	6.93632
mm|chr8:024258921-024258862			A_55_P2089720	A_55_P2089720	Unknown	A_55_P2089720	0.0453142	4.80356	1	0.0390308	4.84205	0.861337	0.0530075	3.79439	1.16978	0.314123	21.1094	6.93212
mm|chr15:96825541-96825482	ref|NM_027052|ens|ENSMUST00000023101|gb|AK164292|gb|AK003626		A_52_P48569	NM_027052	ref|Mus musculus solute carrier family 38, member 4 (Slc38a4), mRNA [NM_027052]	Slc38a4	0.0653428	6.92671	1	0.0364959	4.52758	0.55853	0.0501084	3.58687	0.766854	0.452307	30.3955	6.92206
mm|chr1:138529459-138529518			A_30_P01029886	chr1:138528250-138538250_F	lincRNA:chr1:138528250-138538250 forward strand	chr1:138528250-138538250_F	0.0541133	5.73632	1	0.0474044	5.88086	0.87602	0.261936	18.75	4.84051	0.374418	25.1613	6.91914
mm|chr2:158136176-158136235	ens|ENSMUST00000109491|tc|TC1604477		A_55_P2028986	ENSMUST00000109491	ens|lipopolysaccharide binding protein [Source:MGI Symbol;Acc:MGI:1098776] [ENSMUST00000109491]	Lbp	0.0466282	4.94286	1	0.0399517	4.9563	0.856813	0.203201	14.5456	4.3579	0.322462	21.6698	6.9156
mm|chr17:47061811-47061870	ref|NM_008938|ens|ENSMUST00000024773|gb|AK136280|gb|X14770		A_51_P320340	NM_008938	ref|Mus musculus peripherin 2 (Prph2), mRNA [NM_008938]	Prph2	0.0464433	4.92326	1	0.0398122	4.93899	0.857221	0.249827	17.8832	5.37918	0.321135	21.5806	6.91456
mm|chr7:20281791-20281732	ref|NM_009696|ens|ENSMUST00000173739|ens|ENSMUST00000003066|ens|ENSMUST00000174355		A_51_P171999	NM_009696	ref|Mus musculus apolipoprotein E (Apoe), mRNA [NM_009696]	Apoe	1.34354	142.423	1	6.07834	754.062	4.52413	7.06175	505.496	5.25609	9.27729	623.444	6.90512
mm|chr7:20281791-20281732	ref|NM_009696|ens|ENSMUST00000173739|ens|ENSMUST00000003066|ens|ENSMUST00000174355		A_51_P171999	NM_009696	ref|Mus musculus apolipoprotein E (Apoe), mRNA [NM_009696]	Apoe	1.25506	133.043	1	6.5241	809.362	5.19825	7.13033	510.405	5.68128	8.66538	582.323	6.90437
mm|chr8:23015980-23015921	ref|NM_139221|ens|ENSMUST00000051965|gb|BC099849|gb|AJ437646		A_51_P317254	NM_139221	ref|Mus musculus defensin beta 11 (Defb11), mRNA [NM_139221]	Defb11	0.050923	5.39813	1	0.0445795	5.53041	0.875429	0.334137	23.9183	6.56161	0.351528	23.6231	6.90313
mm|chr7:20281791-20281732	ref|NM_009696|ens|ENSMUST00000173739|ens|ENSMUST00000003066|ens|ENSMUST00000174355		A_51_P171999	NM_009696	ref|Mus musculus apolipoprotein E (Apoe), mRNA [NM_009696]	Apoe	1.30824	138.681	1	6.17975	766.643	4.72371	7.15094	511.881	5.46608	9.00016	604.821	6.87959
mm|chr13:42403101-42403160	ref|NM_010104|ens|ENSMUST00000021796|gb|AK040778|gb|AK153437		A_51_P115005	NM_010104	ref|Mus musculus endothelin 1 (Edn1), mRNA [NM_010104]	Edn1	0.12854	13.626	1	0.363652	45.1137	2.8291	1.24537	89.1465	9.6886	0.884177	59.4177	6.87863
mm|chr10:3231599-3231658			A_30_P01023220	chr10:3231337-3231802_F	lincRNA:chr10:3231337-3231802 forward strand	chr10:3231337-3231802_F	0.0494583	5.24286	1	0.117785	14.6121	2.3815	0.0617608	4.42098	1.24874	0.33998	22.847	6.87408
mm|chr4:63736686-63736627			A_30_P01021278	chr4:63736566-63744848_R	lincRNA:chr4:63736566-63744848 reverse strand	chr4:63736566-63744848_R	0.0458198	4.85716	1	0.0587389	7.28698	1.28195	0.0568198	4.06729	1.24007	0.314935	21.164	6.87335
mm|chr12:89459486-89459427			A_30_P01027831	chr12:89448550-89461843_R	lincRNA:chr12:89448550-89461843 reverse strand	chr12:89448550-89461843_R	0.583679	61.8734	1	0.850862	105.556	1.45776	2.694	192.843	4.61555	4.00273	268.988	6.85776
mm|chr1:036059889-036059830			A_55_P2119272	A_55_P2119272	Unknown	A_55_P2119272	0.0406426	4.30835	1	0.0352991	4.37911	0.868525	0.0500724	3.5843	1.23202	0.278651	18.7257	6.85614
mm|chr17:15117988-15117929			A_30_P01030973	chr17:15111725-15139800_R	lincRNA:chr17:15111725-15139800 reverse strand	chr17:15111725-15139800_R	0.0535957	5.68145	1	0.046534	5.77288	0.868242	0.181491	12.9915	3.38629	0.367359	24.6869	6.85426
mm|chr12:111514980-111514921	ref|NR_002866|tc|TC1608029|nap|NAP036169-1		A_55_P1962861	NR_002866	ref|Mus musculus deiodinase, iodothyronine type III, opposite strand (Dio3os), non-coding RNA [NR_002866]	Dio3os	0.259482	27.5066	1	0.61903	76.7952	2.38564	1.98714	142.244	7.65811	1.77853	119.519	6.85417
mm|chr18:69926871-69926812			A_30_P01027212	chr18:69923410-69965360_R	lincRNA:chr18:69923410-69965360 reverse strand	chr18:69923410-69965360_R	0.0508143	5.38661	1	0.0440547	5.46531	0.866975	0.0599294	4.28988	1.17938	0.347884	23.3782	6.84618
mm|chr15:88529340-88529281	gb|AK149714|ens|ENSMUST00000088911|tc|TC1581491|riken|G530012I18		A_55_P2125241	AK149714	gb|Mus musculus bone marrow macrophage cDNA, RIKEN full-length enriched library, clone:G530012I18 product:bromodomain containing 1, full insert sequence. [AK149714]	Brd1	0.0869078	9.21273	1	0.0439477	5.45204	0.505682	0.121914	8.7269	1.4028	0.594958	39.9819	6.84586
mm|chr14:8609085-8609026			A_30_P01032008	chr14:8576576-8624104_R	lincRNA:chr14:8576576-8624104 reverse strand	chr14:8576576-8624104_R	0.0564523	5.98427	1	0.04871	6.04283	0.862852	0.212374	15.2022	3.76201	0.3864	25.9665	6.84471
mm|chr13:21730508-21730449	ref|NM_146542|ens|ENSMUST00000043081|gb|BC111579|gb|BC165965		A_55_P2151728	NM_146542	ref|Mus musculus olfactory receptor 11 (Olfr11), mRNA [NM_146542]	Olfr11	0.0767417	8.13506	1	0.0432357	5.36371	0.563393	0.10385	7.43381	1.35324	0.523666	35.1909	6.82374
mm|chr12:105506705-105506764	ref|NM_001199940|ens|ENSMUST00000101078|ref|XM_003085834|ref|XM_003085835		A_55_P2142232	NM_001199940	ref|Mus musculus serine (or cysteine) peptidase inhibitor, clade A, member 3I (Serpina3i), mRNA [NM_001199940]	Serpina3i	0.174681	18.5171	1	0.0483214	5.99462	0.276627	1.04875	75.0717	6.0038	1.19172	80.0852	6.82231
mm|chr1:106891123-106891182	ref|NM_011800|ens|ENSMUST00000062528|gb|AF007116|gb|BC119606		A_55_P2061849	NM_011800	ref|Mus musculus cadherin 20 (Cdh20), mRNA [NM_011800]	Cdh20	0.0513761	5.44616	1	0.0829653	10.2925	1.61486	0.0654751	4.68686	1.27443	0.349402	23.4802	6.80087
mm|chr11:48663610-48663669	ref|NM_053166|ens|ENSMUST00000109213|ens|ENSMUST00000046903|nap|NAP103536-1		A_55_P2146663	NM_053166	ref|Mus musculus tripartite motif-containing 7 (Trim7), mRNA [NM_053166]	Trim7	0.0511537	5.42258	1	0.129454	16.0597	2.53069	0.550285	39.3907	10.7575	0.345921	23.2463	6.7624
mm|chr5:105012068-105012009	tc|TC1584441		A_55_P2012314	TC1584441	tc|AY714985 STAT3-interacting protein as a repressor {Mus musculus} (exp=-1; wgp=0; cg=0), partial (85%) [TC1584441]	TC1584441	0.0583946	6.19017	1	0.0789674	9.79648	1.35231	1.10666	79.2173	18.9514	0.394851	26.5344	6.76177
mm|chr5:29556567-29556508	ref|NM_020295|ens|ENSMUST00000055195|gb|AK004199|gb|BC096579		A_52_P214034	NM_020295	ref|Mus musculus limb region 1 (Lmbr1), mRNA [NM_020295]	Lmbr1	0.0663234	7.03066	1	0.133453	16.5559	2.01216	0.225166	16.1179	3.39497	0.447595	30.0789	6.74868
mm|chr10:3516213-3516154	ref|NM_001039652|ens|ENSMUST00000092734|ens|ENSMUST00000056385|ens|ENSMUST00000150374		A_51_P100309	NM_001039652	ref|Mus musculus opioid receptor, mu 1 (Oprm1), mRNA [NM_001039652]	Oprm1	0.0402409	4.26576	1	0.0788697	9.78436	1.95994	0.0494379	3.53888	1.22855	0.270206	18.1582	6.71472
mm|chr16:95519395-95519454	ref|NM_019664|ref|NM_001039057|ref|NM_001039056|ens|ENSMUST00000113854		A_52_P101303	NM_019664	ref|Mus musculus potassium inwardly-rectifying channel, subfamily J, member 15 (Kcnj15), transcript variant 2, mRNA [NM_019664]	Kcnj15	0.0454947	4.8227	1	0.172975	21.4588	3.80209	0.401108	28.7122	8.81657	0.304868	20.4874	6.70116
mm|chr8:19962834-19962775			A_30_P01027326	chr8:19959345-20020379_R	lincRNA:chr8:19959345-20020379 reverse strand	chr8:19959345-20020379_R	0.0594573	6.30281	1	0.167834	20.821	2.82276	0.511144	36.5888	8.59682	0.397156	26.6893	6.67968
mm|chr13:98267374-98267433			A_30_P01028300	chr13:98267049-98267604_F	lincRNA:chr13:98267049-98267604 forward strand	chr13:98267049-98267604_F	0.0512552	5.43335	1	0.0448759	5.56718	0.875538	0.0606431	4.34097	1.18316	0.34188	22.9747	6.67015
mm|chr14:47003450-47003391	ref|NM_007554|ens|ENSMUST00000100676|ens|ENSMUST00000074077|gb|BC034053		A_55_P2154387	NM_007554	ref|Mus musculus bone morphogenetic protein 4 (Bmp4), mRNA [NM_007554]	Bmp4	0.272426	28.8787	1	1.1175	138.634	4.10203	2.48079	177.581	9.10631	1.81522	121.985	6.6632
mm|chr3:30059453-30059394			A_30_P01029345	chr3:30059174-30060808_R	lincRNA:chr3:30059174-30060808 reverse strand	chr3:30059174-30060808_R	0.0669274	7.09468	1	0.0518519	6.4326	0.774748	0.0550425	3.94007	0.822421	0.445887	29.9641	6.66225
mm|chr6:40845394-40845335	ref|NM_175020|ens|ENSMUST00000063523|gb|AK075754|gb|BC048599		A_51_P100537	NM_175020	ref|Mus musculus protease, serine 58 (Prss58), mRNA [NM_175020]	Prss58	0.0494553	5.24254	1	0.045265	5.61546	0.915272	0.0596079	4.26687	1.20529	0.328989	22.1084	6.65224
mm|chr17:26911873-26911932			A_30_P01026788	chr17:26911032-26912366_F	lincRNA:chr17:26911032-26912366 forward strand	chr17:26911032-26912366_F	0.170219	18.0442	1	0.459344	56.985	2.69854	0.769145	55.0571	4.51855	1.13122	76.019	6.64565
mm|chr8:118207332-118207273	ens|ENSMUST00000069009|gb|AK151738|gb|AK152074|gb|AK132165		A_55_P1962429	ENSMUST00000069009	ens|avian musculoaponeurotic fibrosarcoma (v-maf) AS42 oncogene homolog [Source:MGI Symbol;Acc:MGI:96909] [ENSMUST00000069009]	Maf	0.050357	5.33813	1	0.0979681	12.1537	1.94547	0.231091	16.542	4.58905	0.334574	22.4837	6.64404
mm|chr7:105964953-105965012			A_30_P01030315	chr7:105964846-105965163_F	lincRNA:chr7:105964846-105965163 forward strand	chr7:105964846-105965163_F	0.052384	5.553	1	0.045906	5.69498	0.876337	0.0653976	4.68131	1.24843	0.347409	23.3463	6.63197
mm|chr8:63985331-63985390	gb|AK053566|tc|TC1703355|riken|E130110O22|nap|NAP077546-1		A_55_P2308835	AK053566	gb|Mus musculus 0 day neonate eyeball cDNA, RIKEN full-length enriched library, clone:E130110O22 product:unclassifiable, full insert sequence. [AK053566]	E130110O22Rik	0.0439855	4.66271	1	0.137007	16.9967	3.11482	0.230452	16.4963	5.23927	0.291114	19.5632	6.61841
mm|chr11:83388282-83388223	ref|NM_011338|ens|ENSMUST00000019266|gb|U49513|gb|U19482		A_51_P185660	NM_011338	ref|Mus musculus chemokine (C-C motif) ligand 9 (Ccl9), mRNA [NM_011338]	Ccl9	0.513826	54.4685	1	1.42985	177.383	2.78274	3.59538	257.365	6.99727	3.39574	228.197	6.60873
mm|chr2:118412426-118412485			A_30_P01026975	chr2:118408095-118415745_F	lincRNA:chr2:118408095-118415745 forward strand	chr2:118408095-118415745_F	0.0528348	5.60079	1	0.0459295	5.69789	0.869305	0.182727	13.08	3.45845	0.348812	23.4405	6.60193
mm|chr17:31011810-31011751	gb|AK077156|tc|TC1591503|riken|4933414I19|nap|NAP089253-1		A_55_P1982490	AK077156	gb|Mus musculus adult male testis cDNA, RIKEN full-length enriched library, clone:4933414I19 product:hypothetical protein, full insert sequence. [AK077156]	Gm9937	0.0448369	4.75297	1	0.14975	18.5776	3.33989	0.236494	16.9288	5.27454	0.29585	19.8815	6.59837
mm|chr7:55453852-55453793	ref|NM_205795|ens|ENSMUST00000094388|gb|BC107202|gb|BC107203		A_55_P2002975	NM_205795	ref|Mus musculus MAS-related GPR, member B4 (Mrgprb4), mRNA [NM_205795]	Mrgprb4	0.0569815	6.04037	1	0.125743	15.5993	2.20673	0.22531	16.1282	3.95408	0.375208	25.2144	6.58473
mm|chr3:96332113-96332172	ref|NM_027126|ens|ENSMUST00000049208|gb|AK014082|gb|AK009636		A_51_P206824	NM_027126	ref|Mus musculus hemochromatosis type 2 (juvenile) (human homolog) (Hfe2), mRNA [NM_027126]	Hfe2	0.0495759	5.25533	1	0.0428468	5.31546	0.864267	0.593913	42.5136	11.9799	0.326301	21.9278	6.58185
mm|chr8:122787749-122787690			A_30_P01021974	chr8:122787689-122788088_R	lincRNA:chr8:122787689-122788088 reverse strand	chr8:122787689-122788088_R	0.0525799	5.57377	1	0.32122	39.8496	6.10918	0.291662	20.8778	5.54703	0.345396	23.211	6.56898
mm|chr19:056828873-056828814			A_55_P2041988	A_55_P2041988	Unknown	A_55_P2041988	0.346148	36.6937	1	0.510466	63.3271	1.4747	1.78996	128.13	5.17108	2.26824	152.428	6.55278
mm|chr15:75156911-75156852	ref|XM_001475809|ref|XM_003085974		A_55_P1996746	XM_001475809	ref|PREDICTED: Mus musculus predicted gene 3142 (Gm3142), mRNA [XM_001475809]	Gm3142	0.699121	74.1108	1	2.32044	287.868	3.31908	4.48696	321.187	6.418	4.56151	306.538	6.52463
mm|chr16:13409769-13412310	ref|NM_153588|ref|NM_001122667|ens|ENSMUST00000009713|ens|ENSMUST00000149359		A_51_P358066	NM_153588	ref|Mus musculus MKL/myocardin-like 2 (Mkl2), transcript variant 1, mRNA [NM_153588]	Mkl2	0.117312	12.4358	1	0.0495	6.14083	0.42195	0.197077	14.1072	1.67993	0.764692	51.3882	6.51842
mm|chr6:141447805-141447864	ref|NM_018779|ens|ENSMUST00000043259|gb|AF099187|gb|AK052374		A_55_P2049373	NM_018779	ref|Mus musculus phosphodiesterase 3A, cGMP inhibited (Pde3a), mRNA [NM_018779]	Pde3a	0.0500972	5.31059	1	0.0649314	8.05521	1.29611	0.237185	16.9782	4.73449	0.326281	21.9264	6.51295
mm|chr4:153397814-153397521	ref|NM_001163721|ref|NM_001163722|gb|AK004513|gb|AK012228		A_52_P551011	NM_001163721	ref|Mus musculus RIKEN cDNA 1190007F08 gene (1190007F08Rik), transcript variant 1, mRNA [NM_001163721]	1190007F08Rik	0.824715	87.4244	1	2.38368	295.712	2.8903	5.43396	388.975	6.5889	5.37042	360.898	6.51185
mm|chr10:87289181-87289122	ens|ENSMUST00000139652|gb|BC028536		A_55_P2050365	ENSMUST00000139652	ens|predicted gene 16176 [Source:MGI Symbol;Acc:MGI:3841250] [ENSMUST00000139652]	ENSMUST00000139652	0.0577751	6.12449	1	0.0494649	6.13648	0.856163	0.0675926	4.83843	1.16993	0.375982	25.2664	6.50768
mm|chr19:34687522-34687581	ref|NM_001005858|ens|ENSMUST00000099507|gb|AK150632|gb|AK151442		A_55_P1972872	NM_001005858	ref|Mus musculus RIKEN cDNA I830012O16 gene (I830012O16Rik), mRNA [NM_001005858]	I830012O16Rik	0.139033	14.7382	1	0.290479	36.0361	2.08929	1.3587	97.2586	9.77251	0.902397	60.6421	6.49055
mm|chr7:20281791-20281732	ref|NM_009696|ens|ENSMUST00000173739|ens|ENSMUST00000003066|ens|ENSMUST00000174355		A_51_P171999	NM_009696	ref|Mus musculus apolipoprotein E (Apoe), mRNA [NM_009696]	Apoe	1.3988	148.281	1	5.89389	731.18	4.21353	7.40021	529.724	5.29039	9.07355	609.753	6.48666
mm|chr17:88905533-88905474			A_30_P01032582	chr17:88890039-88905680_R	lincRNA:chr17:88890039-88905680 reverse strand	chr17:88890039-88905680_R	0.0468265	4.96387	1	0.15061	18.6843	3.21635	0.0609923	4.36597	1.30252	0.30346	20.3928	6.48052
mm|chr13:42403101-42403160	ref|NM_010104|ens|ENSMUST00000021796|gb|AK040778|gb|AK153437		A_51_P115005	NM_010104	ref|Mus musculus endothelin 1 (Edn1), mRNA [NM_010104]	Edn1	0.192789	20.4367	1	0.344732	42.7665	1.78813	1.58591	113.523	8.22615	1.24819	83.88	6.4744
mm|chr16:90100642-90100583			A_30_P01032911	chr16:90038086-90127636_R	lincRNA:chr16:90038086-90127636 reverse strand	chr16:90038086-90127636_R	0.0532611	5.64598	1	0.0465711	5.77748	0.874392	0.0632943	4.53075	1.18838	0.344807	23.1714	6.47389
mm|chr16:34570972-34570913			A_30_P01033296	chr16:34524589-34573439_R	lincRNA:chr16:34524589-34573439 reverse strand	chr16:34524589-34573439_R	0.0478722	5.07473	1	0.264076	32.7606	5.51627	0.298501	21.3673	6.23536	0.308891	20.7578	6.45241
mm|chr12:105504738-105504797	ref|NM_001199940|ens|ENSMUST00000101078|ref|XM_003085834|ref|XM_003085835		A_55_P1966774	NM_001199940	ref|Mus musculus serine (or cysteine) peptidase inhibitor, clade A, member 3I (Serpina3i), mRNA [NM_001199940]	Serpina3i	0.166237	17.6221	1	0.166858	20.7	1.00374	0.725845	51.9576	4.36633	1.0708	71.9591	6.44142
mm|chr6:148162622-148162563			A_30_P01028880	chr6:148161888-148163095_R	lincRNA:chr6:148161888-148163095 reverse strand	chr6:148161888-148163095_R	0.0500336	5.30385	1	0.0433018	5.37191	0.865455	0.0634051	4.53868	1.26725	0.321831	21.6274	6.4323
mm|chr14:106071717-106071658			A_30_P01033390	chr14:106068373-106146613_R	lincRNA:chr14:106068373-106146613 reverse strand	chr14:106068373-106146613_R	0.0510901	5.41585	1	0.0448064	5.55856	0.877007	0.0641603	4.59274	1.25583	0.327855	22.0322	6.41718
mm|chr4:88563472-88563413			A_30_P01019348	chr4:88563206-88563835_R	lincRNA:chr4:88563206-88563835 reverse strand	chr4:88563206-88563835_R	0.0469565	4.97766	1	0.040264	4.99504	0.857473	0.0775665	5.55239	1.65188	0.301223	20.2425	6.41493
mm|chr4:45096619-45096678			A_30_P01021454	chr4:45079022-45096897_F	lincRNA:chr4:45079022-45096897 forward strand	chr4:45079022-45096897_F	0.0438595	4.64935	1	0.0377672	4.68529	0.861096	0.0520267	3.72419	1.18621	0.28131	18.9044	6.4139
mm|chr2:151770254-151770313	ref|NM_009641|ens|ENSMUST00000168220|ens|ENSMUST00000028955|gb|AF113707		A_51_P372393	NM_009641	ref|Mus musculus angiopoietin 4 (Angpt4), mRNA [NM_009641]	Angpt4	0.0802536	8.50734	1	0.387356	48.0544	4.82665	0.406085	29.0685	5.06002	0.51301	34.4748	6.39235
mm|chr8:112635601-112635660			A_55_P2071824	A_55_P2071824	Unknown	A_55_P2071824	0.0469003	4.9717	1	0.107623	13.3514	2.29471	0.0567701	4.06373	1.21044	0.299703	20.1404	6.39022
mm|chr6:90549091-90549150	ref|NM_027406|ens|ENSMUST00000032175|ens|ENSMUST00000130418|ref|XM_001479188		A_55_P1983733	NM_027406	ref|Mus musculus aldehyde dehydrogenase 1 family, member L1 (Aldh1l1), mRNA [NM_027406]	Aldh1l1	2.6908	285.241	1	3.5931	445.751	1.33533	21.009	1503.87	7.80769	17.1856	1154.89	6.38679
mm|chr8:24368134-24368193	gb|AK077946|gb|AK015825|tc|TC1589743|riken|4930518F22		A_52_P619851	AK077946	gb|Mus musculus 13 days embryo male testis cDNA, RIKEN full-length enriched library, clone:6030456O14 product:hypothetical protein, full insert sequence. [AK077946]	4930518F22Rik	0.0428309	4.54032	1	0.16475	20.4384	3.84653	0.25486	18.2434	5.95037	0.273401	18.3729	6.38327
mm|chr13:94193642-94193701			A_30_P01029264	chr13:94193230-94193710_F	lincRNA:chr13:94193230-94193710 forward strand	chr13:94193230-94193710_F	0.0574899	6.09426	1	0.0452522	5.61386	0.787133	0.254381	18.2091	4.42479	0.36648	24.6278	6.37468
mm|chr7:111530671-111530612			A_30_P01024661	chr7:111526943-111545093_R	lincRNA:chr7:111526943-111545093 reverse strand	chr7:111526943-111545093_R	0.1223	12.9645	1	0.386813	47.987	3.16281	0.868052	62.1371	7.09771	0.778871	52.341	6.36851
mm|chr4:98945389-98945330			A_30_P01025695	chr4:98943050-98959998_R	lincRNA:chr4:98943050-98959998 reverse strand	chr4:98943050-98959998_R	0.0510903	5.41587	1	0.0448269	5.56111	0.877406	0.0640188	4.58261	1.25305	0.325106	21.8475	6.36335
mm|chr6:5118225-5118166	ref|NM_011134|ens|ENSMUST00000002663|gb|U72636|gb|U32684		A_51_P108659	NM_011134	ref|Mus musculus paraoxonase 1 (Pon1), mRNA [NM_011134]	Pon1	0.0409924	4.34543	1	0.113777	14.1149	2.77557	0.306754	21.9581	7.48319	0.260796	17.5258	6.36206
mm|chr17:26912943-26913002			A_30_P01028130	chr17:26911397-26917047_F	lincRNA:chr17:26911397-26917047 forward strand	chr17:26911397-26917047_F	0.0925738	9.81335	1	0.283465	35.1659	3.06204	0.392548	28.0995	4.24038	0.588289	39.5336	6.35481
mm|chr16:8783912-8783971			A_30_P01028232	chr16:8738782-8830148_F	lincRNA:chr16:8738782-8830148 forward strand	chr16:8738782-8830148_F	0.0536473	5.68692	1	0.0465905	5.7799	0.868461	0.0639689	4.57904	1.1924	0.340874	22.9071	6.35399
mm|chr4:88920464-88920405	ref|NM_009877|ref|NM_001040654|ens|ENSMUST00000030237|ens|ENSMUST00000060501		A_55_P2008437	NM_009877	ref|Mus musculus cyclin-dependent kinase inhibitor 2A (Cdkn2a), transcript variant 1, mRNA [NM_009877]	Cdkn2a	37.1258	3935.55	1	118.048	14644.7	3.17967	221.257	15838	5.95965	235.736	15841.7	6.34966
mm|chr13:36822486-36822427	ens|ENSMUST00000122286		A_55_P1954378	ENSMUST00000122286	ens|neuritin 1 [Source:MGI Symbol;Acc:MGI:1915654] [ENSMUST00000122286]	Nrn1	0.0868163	9.20303	1	0.0376238	4.6675	0.433372	0.051813	3.70889	0.596811	0.550805	37.0147	6.34449
mm|chr3:107741939-107741880	ref|NM_008184|ens|ENSMUST00000106683|ens|ENSMUST00000106684|ens|ENSMUST00000106685		A_55_P2031671	NM_008184	ref|Mus musculus glutathione S-transferase, mu 6 (Gstm6), mRNA [NM_008184]	Gstm6	0.0451534	4.78652	1	0.0869306	10.7844	1.92523	0.19214	13.7538	4.25528	0.286181	19.2316	6.33796
mm|chr10:23769916-23769975	ref|NM_001010839|ens|ENSMUST00000071691|gb|BC139175|gb|BC139176		A_66_P127620	NM_001010839	ref|Mus musculus trace amine-associated receptor 7F (Taar7f), mRNA [NM_001010839]	Taar7f	0.0465151	4.93087	1	0.063028	7.81909	1.355	0.0861225	6.16484	1.85149	0.294479	19.7893	6.33082
mm|chr6:129158630-129158571			A_30_P01018888	chr6:129151512-129208737_R	lincRNA:chr6:129151512-129208737 reverse strand	chr6:129151512-129208737_R	0.0680798	7.21684	1	0.111789	13.8683	1.64204	0.438454	31.3855	6.4403	0.430899	28.9569	6.32933
mm|chr5:115823521-115823580			A_30_P01029832	chr5:115806200-115834425_F	lincRNA:chr5:115806200-115834425 forward strand	chr5:115806200-115834425_F	0.0473965	5.0243	1	0.0979906	12.1564	2.06746	0.115379	8.25912	2.43435	0.299836	20.1493	6.32612
mm|chr2:67836138-67836197			A_30_P01030934	chr2:67836003-67836461_F	lincRNA:chr2:67836003-67836461 forward strand	chr2:67836003-67836461_F	0.0515459	5.46416	1	0.0449065	5.57097	0.871194	0.0605066	4.3312	1.17384	0.32578	21.8927	6.32019
mm|chr15:61368621-61368562	gb|AK050837|gb|BB440890|tc|TC1624533|riken|D030024E09		A_66_P129712	AK050837	gb|Mus musculus 9 days embryo whole body cDNA, RIKEN full-length enriched library, clone:D030024E09 product:unclassifiable, full insert sequence. [AK050837]	D030024E09Rik	0.0460304	4.87949	1	0.0574729	7.12993	1.24858	0.149865	10.7277	3.25579	0.290915	19.5498	6.32005
mm|chr2:62170121-62170062	ref|NM_010074|ens|ENSMUST00000047812|gb|BC022183|gb|AK153939		A_51_P467110	NM_010074	ref|Mus musculus dipeptidylpeptidase 4 (Dpp4), transcript variant 1, mRNA [NM_010074]	Dpp4	0.0481081	5.09974	1	0.0592968	7.35619	1.23257	0.0596058	4.26672	1.239	0.303809	20.4163	6.31512
mm|chr14:115445649-115445708			A_30_P01033133	chr14:115443612-115445950_F	lincRNA:chr14:115443612-115445950 forward strand	chr14:115443612-115445950_F	0.0486667	5.15895	1	0.0539867	6.69745	1.10932	0.0683181	4.89037	1.4038	0.307125	20.6391	6.31078
mm|chr7:117144713-117144654			A_30_P01018383	chr7:117144653-117150145_R	lincRNA:chr7:117144653-117150145 reverse strand	chr7:117144653-117150145_R	0.136706	14.4916	1	0.114534	14.2087	0.837812	0.299199	21.4174	2.18864	0.861705	57.9075	6.30337
mm|chr2:135895179-135895238	ref|NM_029530|ens|ENSMUST00000123436|ens|ENSMUST00000057503|gb|AK014127		A_51_P123262	NM_029530	ref|Mus musculus RIKEN cDNA 6330527O06 gene (6330527O06Rik), mRNA [NM_029530]	6330527O06Rik	0.0504054	5.34327	1	0.0434392	5.38895	0.861796	0.0647707	4.63643	1.28499	0.317723	21.3513	6.30334
mm|chr3:86885828-86885887			A_30_P01021621	chr3:86827945-86886695_F	lincRNA:chr3:86827945-86886695 forward strand	chr3:86827945-86886695_F	0.0468787	4.96941	1	0.0421156	5.22474	0.898394	0.0967712	6.9271	2.06429	0.295142	19.8339	6.29586
mm|chr3:115829012-115828953	ref|NM_011693|ens|ENSMUST00000106493|ens|ENSMUST00000029574|gb|AK016465		A_52_P520495	NM_011693	ref|Mus musculus vascular cell adhesion molecule 1 (Vcam1), mRNA [NM_011693]	Vcam1	0.413271	43.809	1	0.419812	52.0808	1.01583	2.78245	199.174	6.73275	2.60049	174.756	6.29247
mm|chr2:87551188-87551129	ref|NM_001011833|ens|ENSMUST00000099850|tc|NP1398927		A_55_P2011635	NM_001011833	ref|Mus musculus olfactory receptor 1137 (Olfr1137), mRNA [NM_001011833]	Olfr1137	0.056936	6.03554	1	0.0481346	5.97145	0.845416	0.178055	12.7456	3.12729	0.357563	24.0286	6.28009
mm|chr15:78728976-78728917	ref|XM_003085086|gb|AK142477|riken|D530027E22		A_55_P2157537	XM_003085086	ref|PREDICTED: Mus musculus predicted gene 10866 (Gm10866), mRNA [XM_003085086]	Gm10866	0.0822	8.71367	1	0.123305	15.2968	1.50006	0.121137	8.67125	1.47368	0.515967	34.6735	6.27697
mm|chr3:108771219-108771160			A_30_P01028038	chr3:108763862-108772151_R	lincRNA:chr3:108763862-108772151 reverse strand	chr3:108763862-108772151_R	0.0528093	5.59808	1	0.0459452	5.69983	0.870021	0.181395	12.9847	3.43491	0.331189	22.2563	6.27141
mm|chr7:106928603-106928544	ens|ENSMUST00000065741|ref|XR_105137|ref|XR_107928|gb|AK089468		A_66_P114726	ENSMUST00000065741	ens|RIKEN cDNA F730035P03 gene [Source:MGI Symbol;Acc:MGI:3045385] [ENSMUST00000065741]	ENSMUST00000065741	0.0537229	5.69494	1	0.046639	5.78591	0.86814	0.0641068	4.58891	1.19329	0.33622	22.5943	6.25841
mm|chr15:75066159-75066100	ens|ENSMUST00000089689|nap|NAP068773-1		A_55_P2129316	ENSMUST00000089689	ens|predicted pseudogene 10238 [Source:MGI Symbol;Acc:MGI:3641620] [ENSMUST00000089689]	ENSMUST00000089689	4.262	451.796	1	13.8946	1723.72	3.26011	25.8463	1850.14	6.06437	26.661	1791.65	6.25551
mm|chr7:109952413-109952472	ref|NM_146359|ens|ENSMUST00000061096|tc|NP646956|nap|NAP057836-1		A_52_P345237	NM_146359	ref|Mus musculus olfactory receptor 564 (Olfr564), mRNA [NM_146359]	Olfr564	0.0436922	4.63162	1	0.0409806	5.08394	0.937938	0.0542386	3.88252	1.24138	0.273296	18.3658	6.25503
mm|chr11:95657615-95657556			A_30_P01025713	chr11:95644899-95658549_R	lincRNA:chr11:95644899-95658549 reverse strand	chr11:95644899-95658549_R	0.039755	4.21426	1	0.0344659	4.27574	0.866956	0.130183	9.31883	3.27464	0.24848	16.6981	6.25027
mm|chr7:52900705-52900764	ref|NM_172418|ens|ENSMUST00000153706|ens|ENSMUST00000098455|ens|ENSMUST00000150045		A_51_P122141	NM_172418	ref|Mus musculus MEF2 activating motif and SAP domain containing transcriptional regulator (Mamstr), mRNA [NM_172418]	Mamstr	0.0808538	8.57097	1	0.147516	18.3004	1.82448	0.562628	40.2742	6.95858	0.504187	33.8819	6.23578
unmapped	gb|BQ950205		A_55_P2386742	BQ950205	gb|AGENCOURT_8864115 NIH_MGC_129 Mus musculus cDNA clone IMAGE:6311775 5', mRNA sequence [BQ950205]	Gm9958	0.0727929	7.71647	1	0.0666608	8.26976	0.915759	0.472849	33.8476	6.49581	0.452904	30.4356	6.22181
mm|chr12:3414414-3414355			A_30_P01018628	chr12:3406750-3425850_R	lincRNA:chr12:3406750-3425850 reverse strand	chr12:3406750-3425850_R	0.0493685	5.23334	1	0.0573336	7.11265	1.16134	0.183816	13.1579	3.72334	0.306931	20.6261	6.21716
mm|chr12:92921077-92921018	ref|XR_106489|ref|XR_106744|gb|AK158157|riken|F930036F13		A_55_P2032440	XR_106489	ref|PREDICTED: Mus musculus predicted gene 8378 (Gm8378), partial miscRNA [XR_106489]	Gm8378	0.0427091	4.52741	1	0.146874	18.2208	3.43894	0.0526706	3.77028	1.23324	0.2653	17.8285	6.2118
mm|chr11:6789402-6789461			A_30_P01021157	chr11:6748267-6818192_F	lincRNA:chr11:6748267-6818192 forward strand	chr11:6748267-6818192_F	0.0460724	4.88394	1	0.218295	27.0811	4.73808	0.0543606	3.89126	1.1799	0.285931	19.2149	6.20612
mm|chr7:20281791-20281732	ref|NM_009696|ens|ENSMUST00000173739|ens|ENSMUST00000003066|ens|ENSMUST00000174355		A_51_P171999	NM_009696	ref|Mus musculus apolipoprotein E (Apoe), mRNA [NM_009696]	Apoe	1.48368	157.278	1	5.98008	741.872	4.03058	7.22302	517.04	4.86832	9.20579	618.639	6.20472
mm|chr1:166139728-166141916	ref|NM_007976|ens|ENSMUST00000086040|gb|BC156130|gb|BC172650		A_51_P407323	NM_007976	ref|Mus musculus coagulation factor V (F5), mRNA [NM_007976]	F5	0.0694043	7.35725	1	0.0475119	5.8942	0.684568	0.285245	20.4185	4.1099	0.430334	28.9189	6.20039
mm|chr15:59847037-59846978	ref|NM_027668|ens|ENSMUST00000096421|gb|AK016789|tc|TC1593406		A_51_P477604	NM_027668	ref|Mus musculus RIKEN cDNA 4933412E24 gene (4933412E24Rik), mRNA [NM_027668]	4933412E24Rik	0.0484072	5.13144	1	0.0417626	5.18095	0.862735	0.0566717	4.05669	1.17073	0.300022	20.1618	6.19789
mm|chr3:96468377-96468436	ref|NM_001081053|ens|ENSMUST00000119365|ens|ENSMUST00000029744|gb|AK037222		A_55_P2111533	NM_001081053	ref|Mus musculus integrin, alpha 10 (Itga10), mRNA [NM_001081053]	Itga10	0.393402	41.7029	1	0.821353	101.895	2.08782	1.68722	120.775	4.28881	2.43546	163.665	6.19076
mm|chr5:82256741-82256800	gb|AK013749|gb|CJ261689|riken|2900064F13|nap|NAP020445-001		A_55_P2415930	AK013749	gb|Mus musculus adult male hippocampus cDNA, RIKEN full-length enriched library, clone:2900064F13 product:unclassifiable, full insert sequence. [AK013749]	2900064F13Rik	0.0465186	4.93124	1	0.0530085	6.57609	1.13951	0.0556222	3.98156	1.1957	0.28779	19.3398	6.18656
mm|chr7:114058578-114058637	ref|NM_001011542|ens|ENSMUST00000072368|ens|ENSMUST00000098140|gb|BC148580		A_55_P2079812	NM_001011542	ref|Mus musculus olfactory receptor 1532, pseudogene 1 (Olfr1532-ps1), mRNA [NM_001011542]	Olfr1532-ps1	0.0459442	4.87035	1	0.039652	4.91912	0.863047	0.105059	7.52036	2.28667	0.284214	19.0995	6.18608
mm|chr3:138167023-138166964			A_55_P2111776	A_55_P2111776	Unknown	A_55_P2111776	0.0497956	5.27861	1	0.0431131	5.34849	0.865802	0.0629224	4.50413	1.26361	0.307909	20.6919	6.18347
mm|chr16:46389701-46389760			A_30_P01022771	chr16:46384974-46391331_F	lincRNA:chr16:46384974-46391331 forward strand	chr16:46384974-46391331_F	0.0902939	9.57167	1	0.0782433	9.70665	0.86654	0.140653	10.0682	1.55772	0.557472	37.4627	6.17397
mm|chr10:81623086-81623145	gb|AK037654|tc|TC1610934|riken|A130033P14|nap|NAP079660-1		A_55_P2335120	AK037654	gb|Mus musculus 16 days neonate thymus cDNA, RIKEN full-length enriched library, clone:A130033P14 product:unclassifiable, full insert sequence. [AK037654]	A130033P14	0.0515772	5.46748	1	0.0443836	5.5061	0.860527	0.0665609	4.76458	1.29051	0.31814	21.3793	6.16823
mm|chr8:97814552-97814493	ref|NM_145601|ens|ENSMUST00000133716|ens|ENSMUST00000134207|ens|ENSMUST00000093268		A_55_P2100739	NM_145601	ref|Mus musculus cyclic nucleotide gated channel beta 1 (Cngb1), transcript variant 2, mRNA [NM_145601]	Cngb1	0.0686383	7.27606	1	0.276887	34.3499	4.034	0.258725	18.5201	3.76939	0.423215	28.4405	6.16587
mm|chrUn_random:000032277-000032218			A_55_P2143081	A_55_P2143081	Unknown	A_55_P2143081	0.0990947	10.5046	1	0.0959121	11.8986	0.967883	0.416804	29.8358	4.20612	0.607075	40.7961	6.12622
mm|chr6:23108337-23108396			A_30_P01030859	chr6:23105525-23118900_F	lincRNA:chr6:23105525-23118900 forward strand	chr6:23105525-23118900_F	0.0434196	4.60273	1	0.167519	20.782	3.85815	0.0993796	7.11382	2.28882	0.265934	17.8711	6.12475
mm|chr2:84836104-84836045	gb|AK053021|gb|BB524055|tc|TC1594214|riken|D930017N16		A_55_P2050069	AK053021	gb|Mus musculus 15 days embryo head cDNA, RIKEN full-length enriched library, clone:D930017N16 product:hypothetical protein, full insert sequence. [AK053021]	P2rx3	0.0722633	7.66032	1	0.176522	21.8988	2.44276	0.271173	19.4112	3.75257	0.442554	29.7401	6.12419
mm|chr17:24341812-24341753	ref|NM_010947|ens|ENSMUST00000024931|gb|AK031199|gb|AK083904		A_52_P505192	NM_010947	ref|Mus musculus netrin 3 (Ntn3), mRNA [NM_010947]	Ntn3	0.125652	13.3199	1	0.191291	23.731	1.52238	1.22319	87.5588	9.73473	0.76938	51.7032	6.12308
mm|chr1:173393848-173393907	ref|NM_172647|ens|ENSMUST00000043839|gb|BC021876|gb|U89915		A_51_P458866	NM_172647	ref|Mus musculus F11 receptor (F11r), mRNA [NM_172647]	F11r	0.500205	53.0246	1	0.697679	86.5521	1.39478	3.26573	233.768	6.52878	3.06217	205.781	6.12183
mm|chr1:077057972-077058031			A_55_P2086084	A_55_P2086084	Unknown	A_55_P2086084	0.052803	5.59742	1	0.0459252	5.69736	0.869746	0.0657301	4.70511	1.24482	0.323168	21.7173	6.12026
mm|chr2:12028521-12028462	ref|NM_001001309|ens|ENSMUST00000028106|gb|AK031326|gb|AK033007		A_51_P309920	NM_001001309	ref|Mus musculus integrin alpha 8 (Itga8), mRNA [NM_001001309]	Itga8	0.112252	11.8994	1	0.560696	69.5584	4.99496	1.5638	111.941	13.9311	0.686998	46.167	6.12012
mm|chr10:80858017-80858076	gb|AK030337|gb|BC036160|gb|BC036156|gb|AK008832		A_55_P2031403	AK030337	gb|Mus musculus 11 days pregnant adult female ovary and uterus cDNA, RIKEN full-length enriched library, clone:5033427P15 product:weakly similar to HSPC323 (FRAGMENT) [Homo sapiens], full insert sequence. [AK030337]	2210404O07Rik	0.24493	25.964	1	0.360572	44.7315	1.47214	1.4331	102.584	5.85103	1.49708	100.606	6.11229
mm|chr8:49866359-49866300			A_30_P01027172	chr8:49866197-49866841_R	lincRNA:chr8:49866197-49866841 reverse strand	chr8:49866197-49866841_R	0.0400712	4.24777	1	0.111898	13.8817	2.79247	0.0492591	3.52608	1.22929	0.244921	16.459	6.11215
mm|chrX:47918120-47918179			A_30_P01018568	chrX:47893703-47996700_F	lincRNA:chrX:47893703-47996700 forward strand	chrX:47893703-47996700_F	0.110898	11.7558	1	0.0667688	8.28315	0.602074	0.198479	14.2076	1.78975	0.677314	45.5163	6.10755
mm|chr8:9461161-9461220	gb|AK015328|gb|AV263342|riken|4930435N07|nap|NAP074177-1		A_55_P2404479	AK015328	gb|Mus musculus adult male testis cDNA, RIKEN full-length enriched library, clone:4930435N07 product:unclassifiable, full insert sequence. [AK015328]	4930435N07Rik	0.0466986	4.95032	1	0.0400519	4.96873	0.857668	0.0900005	6.44244	1.92726	0.285191	19.1651	6.10706
mm|chr7:116638566-116638625	gb|AK016962|gb|AV282107|riken|4933428C20|nap|NAP013451-001		A_55_P2334177	AK016962	gb|Mus musculus adult male testis cDNA, RIKEN full-length enriched library, clone:4933428C20 product:unclassifiable, full insert sequence. [AK016962]	4933428C20Rik	0.0521388	5.52701	1	0.0452827	5.61765	0.868502	0.21451	15.3551	4.11421	0.318113	21.3775	6.10126
mm|chr3:75451765-75451706	ref|NR_040539|gb|AK010436|tc|TC1668733|riken|2410007B07		A_55_P2228515	NR_040539	ref|Mus musculus RIKEN cDNA 2410007B07 gene (2410007B07Rik), non-coding RNA [NR_040539]	2410007B07Rik	0.0441492	4.68006	1	0.038158	4.73377	0.864296	0.0517042	3.7011	1.17112	0.26927	18.0953	6.0991
mm|chr12:58838729-58838785	ens|ENSMUST00000061000|ref|XM_003084900|ref|XM_003085811|ens|ENSMUST00000172939		A_52_P1016836	ENSMUST00000061000	ens|tetratricopeptide repeat domain 6 [Source:MGI Symbol;Acc:MGI:2684915] [ENSMUST00000061000]	ENSMUST00000061000	0.0802017	8.50184	1	0.0494292	6.13205	0.616311	0.0676074	4.83949	0.842968	0.489116	32.8692	6.09858
mm|chr7:150685176-150685235	ref|NM_001042760|ref|NM_008767|ens|ENSMUST00000168752|ens|ENSMUST00000052348		A_55_P2037717	NM_001042760	ref|Mus musculus solute carrier family 22 (organic cation transporter), member 18 (Slc22a18), transcript variant 2, mRNA [NM_001042760]	Slc22a18	0.697925	73.9841	1	2.2402	277.913	3.20979	4.18991	299.923	6.00338	4.25624	286.024	6.09841
mm|chr17:29192811-29192752			A_30_P01021480	chr17:29192453-29216073_R	lincRNA:chr17:29192453-29216073 reverse strand	chr17:29192453-29216073_R	0.262005	27.774	1	0.23924	29.6795	0.913114	0.361436	25.8724	1.3795	1.59733	107.342	6.09656
mm|chr13:70815654-70815595			A_30_P01023412	chr13:70815593-70820844_R	lincRNA:chr13:70815593-70820844 reverse strand	chr13:70815593-70820844_R	0.0629327	6.67123	1	0.107086	13.2847	1.70159	0.188567	13.498	2.99632	0.383623	25.7799	6.09576
mm|chr7:20281791-20281732	ref|NM_009696|ens|ENSMUST00000173739|ens|ENSMUST00000003066|ens|ENSMUST00000174355		A_51_P171999	NM_009696	ref|Mus musculus apolipoprotein E (Apoe), mRNA [NM_009696]	Apoe	1.53185	162.385	1	5.80529	720.189	3.78972	7.53695	539.512	4.92015	9.33586	627.38	6.09449
mm|chr2:93256176-93256235	ref|NR_040529|ens|ENSMUST00000137073|gb|AK029608|tc|TC1615664		A_55_P2060764	NR_040529	ref|Mus musculus predicted gene 13807 (Gm13807), non-coding RNA [NR_040529]	Gm13807	0.0761906	8.07664	1	0.0467313	5.79736	0.613348	0.0881098	6.3071	1.15644	0.464094	31.1876	6.09122
mm|chr6:115226390-115226449	ref|NM_013681|ens|ENSMUST00000168650|ens|ENSMUST00000169345|gb|AK029181		A_52_P62444	NM_013681	ref|Mus musculus synapsin II (Syn2), transcript variant IIb, mRNA [NM_013681]	Syn2	0.0516658	5.47687	1	0.347174	43.0695	6.71961	0.348591	24.9529	6.74704	0.31448	21.1334	6.08681
mm|chr3:151394094-151394035	ref|NM_133871|ens|ENSMUST00000029671|gb|BC111882|gb|BC112402		A_51_P487690	NM_133871	ref|Mus musculus interferon-induced protein 44 (Ifi44), mRNA [NM_133871]	Ifi44	0.0535117	5.67254	1	0.0745238	9.24522	1.39267	0.486075	34.7943	9.08354	0.325306	21.8609	6.07916
mm|chr2:164665081-164665022	ref|NM_011125|ens|ENSMUST00000109316|ens|ENSMUST00000059954|gb|U37226		A_55_P1993955	NM_011125	ref|Mus musculus phospholipid transfer protein (Pltp), mRNA [NM_011125]	Pltp	0.939143	99.5545	1	1.58217	196.279	1.68469	4.67711	334.798	4.98019	5.70857	383.622	6.07849
mm|chr17:35399347-35399288	gb|AK017289|riken|5430410E06|nap|NAP000023-012		A_55_P1981464	AK017289	gb|Mus musculus 6 days neonate head cDNA, RIKEN full-length enriched library, clone:5430410E06 product:unclassifiable, full insert sequence. [AK017289]	5430410E06Rik	0.0523377	5.5481	1	0.045418	5.63444	0.867788	0.0621795	4.45095	1.18804	0.318097	21.3765	6.07778
mm|chrX:70420933-70420874	ref|NM_001243002|ref|NR_040388|ref|XM_001476854|ref|XM_001476944		A_55_P2036018	NM_001243002	ref|Mus musculus RIKEN cDNA 4930408F14 gene (4930408F14Rik), mRNA [NM_001243002]	4930408F14Rik	0.0518959	5.50126	1	0.0453195	5.62221	0.873277	0.0626691	4.48599	1.20759	0.315186	21.1808	6.07342
mm|chr7:20281791-20281732	ref|NM_009696|ens|ENSMUST00000173739|ens|ENSMUST00000003066|ens|ENSMUST00000174355		A_51_P171999	NM_009696	ref|Mus musculus apolipoprotein E (Apoe), mRNA [NM_009696]	Apoe	1.31999	139.926	1	6.46037	801.456	4.89428	6.9304	496.093	5.25036	7.98074	536.315	6.04609
mm|chr7:147686814-147686755	ref|NM_146520|ens|ENSMUST00000064392|ens|ENSMUST00000106056|gb|BC051116		A_55_P1980771	NM_146520	ref|Mus musculus olfactory receptor 536 (Olfr536), mRNA [NM_146520]	Olfr536	0.0593482	6.29124	1	0.0463799	5.75377	0.781489	0.0630803	4.51543	1.06289	0.358632	24.1005	6.04285
mm|chr7:147388089-147388030	ref|NM_001011814|ens|ENSMUST00000051943|gb|BC147558|gb|BC147561		A_52_P438919	NM_001011814	ref|Mus musculus olfactory receptor 524 (Olfr524), mRNA [NM_001011814]	Olfr524	0.0695943	7.37739	1	0.0648994	8.05124	0.932539	0.436655	31.2568	6.2743	0.420442	28.2541	6.04132
mm|chr11:94658559-94658500	gb|CO425015|tc|TC1623563		A_55_P2165695	CO425015	gb|UI-M-HU0-cre-p-23-0-UI.r1 NIH_BMAP_HU0 Mus musculus cDNA clone IMAGE:30681118 5', mRNA sequence [CO425015]	Gm11546	0.0473923	5.02385	1	0.0406626	5.04449	0.858	0.0659044	4.71758	1.39061	0.286303	19.2399	6.04112
mm|chr10:81746383-81746324	ens|ENSMUST00000171401|ref|XM_003084854|ref|XM_003085726|gb|AK030006		A_55_P2155694	ENSMUST00000171401	ens|RIKEN cDNA 4932415D10 gene [Source:MGI Symbol;Acc:MGI:3045298] [ENSMUST00000171401]	LOC100503696	0.0499408	5.29401	1	0.0869166	10.7826	1.74039	0.068674	4.91584	1.37511	0.301267	20.2455	6.03249
mm|chr13:46273459-46273400	ens|ENSMUST00000072437|ref|XM_001473359|ref|XM_001474564|gb|AK028988		A_55_P2010887	ENSMUST00000072437	ens|predicted gene 10113 [Source:MGI Symbol;Acc:MGI:3642714] [ENSMUST00000072437]	Gm10113	0.0539968	5.72397	1	0.0470646	5.83871	0.871618	0.0637065	4.56026	1.17982	0.325597	21.8805	6.02992
mm|chrX:75827922-75827863			A_30_P01032726	chrX:75813213-75829323_R	lincRNA:chrX:75813213-75829323 reverse strand	chrX:75813213-75829323_R	0.0511315	5.42023	1	0.0447654	5.55347	0.875496	0.0605086	4.33134	1.18339	0.308	20.698	6.0237
mm|chr18:38543700-38543641			A_30_P01022903	chr18:38542830-38544720_R	lincRNA:chr18:38542830-38544720 reverse strand	chr18:38542830-38544720_R	0.0513942	5.44808	1	0.107053	13.2807	2.08298	0.293886	21.037	5.71827	0.309579	20.8041	6.02363
mm|chr10:97187629-97187570	ens|ENSMUST00000166373|ref|XM_003084839|ref|XM_003085722|gb|AK047662		A_55_P2427085	ENSMUST00000166373	ens|RIKEN cDNA C030005K15 gene [Source:MGI Symbol;Acc:MGI:3641867] [ENSMUST00000166373]	C030005K15Rik	0.0410948	4.35628	1	0.0358062	4.44202	0.871307	0.0508596	3.64064	1.23762	0.247436	16.628	6.02111
mm|chr11:95657553-95657612			A_30_P01032019	chr11:95644899-95658549_F	lincRNA:chr11:95644899-95658549 forward strand	chr11:95644899-95658549_F	0.0407805	4.32297	1	0.0417599	5.18062	1.02402	0.145763	10.4341	3.57434	0.245531	16.5	6.0208
mm|chr14:65436022-65436081			A_30_P01023655	chr14:65431652-65437902_F	lincRNA:chr14:65431652-65437902 forward strand	chr14:65431652-65437902_F	0.0513435	5.44271	1	0.0441904	5.48214	0.860681	0.0664201	4.7545	1.29364	0.30886	20.7557	6.01556
mm|chr9:40630697-40630756	ref|XM_003084785|ref|XM_003086721|gb|AK038159|riken|A130083C16		A_55_P1986781	XM_003084785	ref|PREDICTED: Mus musculus predicted gene 10694 (Gm10694), mRNA [XM_003084785]	XM_003084785	0.0499766	5.29781	1	0.0443271	5.4991	0.886957	0.0614635	4.3997	1.22984	0.300576	20.1991	6.01434
mm|chr12:120401337-120401278	ref|NM_177290|gb|BC144785|gb|BC120691|gb|BC125343		A_55_P1998244	NM_177290	ref|Mus musculus integrin beta 8 (Itgb8), mRNA [NM_177290]	Itgb8	0.0419909	4.45128	1	0.0372711	4.62375	0.887598	0.0521553	3.73339	1.24206	0.252548	16.9715	6.01433
mm|chr4:52923764-52923705	ref|NM_146839|ens|ENSMUST00000107667|ens|ENSMUST00000051600|gb|BC128006		A_55_P2108461	NM_146839	ref|Mus musculus olfactory receptor 272 (Olfr272), mRNA [NM_146839]	Olfr272	0.044718	4.74036	1	0.0396377	4.91734	0.886393	0.0548777	3.92827	1.2272	0.268933	18.0726	6.01399
mm|chr4:114632062-114632003			A_30_P01026300	chr4:114631940-114632618_R	lincRNA:chr4:114631940-114632618 reverse strand	chr4:114631940-114632618_R	0.0465979	4.93964	1	0.0407128	5.05072	0.873704	0.0550962	3.94391	1.18237	0.279895	18.8092	6.0066
mm|chr10:75400525-75400466	ens|ENSMUST00000059658|ref|XR_105408|ref|XR_106529|gb|AK144847		A_55_P2040873	ENSMUST00000059658	ens|predicted gene 867 [Source:MGI Symbol;Acc:MGI:2685713] [ENSMUST00000059658]	ENSMUST00000059658	0.040225	4.26408	1	0.11523	14.2951	2.86463	0.184529	13.209	4.58741	0.241605	16.2361	6.00634
mm|chr7:50019989-50019930	ref|NM_001105059|ref|NM_001105061|ens|ENSMUST00000169351|ens|ENSMUST00000169130		A_55_P2019569	NM_001105059	ref|Mus musculus vomeronasal 2, receptor 62 (Vmn2r62), mRNA [NM_001105059]	Vmn2r62	0.0432056	4.58003	1	0.0377522	4.68343	0.87378	0.180423	12.9151	4.17593	0.259311	17.426	6.00179
mm|chr10:87502176-87502117	gb|AK135819|riken|7420422B15		A_55_P1973531	AK135819	gb|Mus musculus in vitro fertilized eggs cDNA, RIKEN full-length enriched library, clone:7420422B15 product:hypothetical protein, full insert sequence. [AK135819]	Gm10763	0.0474744	5.03255	1	0.0665491	8.25589	1.40179	0.250797	17.9526	5.2828	0.284906	19.146	6.00125
mm|chr8:18918754-18918813			A_30_P01030948	chr8:18895366-18925423_F	lincRNA:chr8:18895366-18925423 forward strand	chr8:18895366-18925423_F	0.0471876	5.00216	1	0.0987249	12.2475	2.09218	0.146581	10.4926	3.10635	0.282593	18.9905	5.9887
mm|chr2:28151552-28151611			A_30_P01032639	chr2:28151215-28151611_F	lincRNA:chr2:28151215-28151611 forward strand	chr2:28151215-28151611_F	0.0440206	4.66643	1	0.0380539	4.72086	0.864457	0.680117	48.6843	15.45	0.263478	17.706	5.98534
mm|chr2:150119606-150119665			A_30_P01028109	chr2:150091945-150119782_F	lincRNA:chr2:150091945-150119782 forward strand	chr2:150091945-150119782_F	0.0456135	4.83529	1	0.0713149	8.84713	1.56346	0.174213	12.4705	3.81932	0.272941	18.3419	5.98378
mm|chr14:53455536-53455785	ens|ENSMUST00000103586|gb|EF154513|tc|TC1700059		A_55_P1980836	ENSMUST00000103586	ens|T cell receptor alpha variable 7D-5 [Source:MGI Symbol;Acc:MGI:3649422] [ENSMUST00000103586]	ENSMUST00000103586	0.0560507	5.9417	1	0.04652	5.77114	0.829962	0.587022	42.0203	10.473	0.335234	22.5281	5.98091
mm|chr7:119822439-119822498			A_30_P01027274	chr7:119735208-119822808_F	lincRNA:chr7:119735208-119822808 forward strand	chr7:119735208-119822808_F	0.042733	4.52994	1	0.0377534	4.68359	0.883472	0.0880267	6.30115	2.05992	0.255571	17.1747	5.98065
mm|chr7:31684261-31684202	ref|NM_010758|ens|ENSMUST00000073818|ens|ENSMUST00000040548|ens|ENSMUST00000165625		A_55_P2062757	NM_010758	ref|Mus musculus myelin-associated glycoprotein (Mag), mRNA [NM_010758]	Mag	0.0501098	5.31193	1	0.179075	22.2155	3.57365	0.365308	26.1495	7.29014	0.299564	20.131	5.97814
mm|chr11:3242107-3242166	ref|NM_178149|ens|ENSMUST00000045153|gb|AK005141|gb|AK161428		A_51_P463428	NM_178149	ref|Mus musculus phosphoinositide-3-kinase interacting protein 1 (Pik3ip1), mRNA [NM_178149]	Pik3ip1	0.915628	97.0618	1	2.51186	311.614	2.74332	6.86584	491.472	7.4985	5.463	367.119	5.96639
mm|chr5:92775840-92775781	ref|NM_021274|ens|ENSMUST00000038816|gb|AF227743|gb|AK151534		A_55_P2016462	NM_021274	ref|Mus musculus chemokine (C-X-C motif) ligand 10 (Cxcl10), mRNA [NM_021274]	Cxcl10	0.0944792	10.0153	1	0.0687013	8.5229	0.727158	0.314739	22.5297	3.3313	0.563408	37.8616	5.96331
mm|chr14:49182892-49182951	gb|AK016278|riken|4930572G02|nap|NAP012903-001		A_55_P2180964	AK016278	gb|Mus musculus adult male testis cDNA, RIKEN full-length enriched library, clone:4930572G02 product:unclassifiable, full insert sequence. [AK016278]	4930572G02Rik	0.0493319	5.22946	1	0.0424603	5.26751	0.860707	0.108162	7.74246	2.19253	0.293606	19.7306	5.95164
mm|chr15:089596416-089596357	tc|TC1724141		A_55_P1969742	TC1724141	tc|Q6QI81_RAT (Q6QI81) LRRGT00127, partial (9%) [TC1724141]	TC1724141	0.0436205	4.62402	1	0.0572663	7.10431	1.31283	0.054517	3.90245	1.2498	0.259473	17.4369	5.94842
mm|chr1:175854265-175854206	ref|NM_001045481|ref|NM_008328|ens|ENSMUST00000128430|ens|ENSMUST00000042228		A_55_P1966731	NM_001045481	ref|Mus musculus interferon activated gene 203 (Ifi203), transcript variant 1, mRNA [NM_001045481]	Ifi203	0.0996607	10.5646	1	0.0624036	7.74162	0.626161	0.533618	38.1976	5.35435	0.592502	39.8168	5.94519
mm|chr5:122990922-122990863			A_30_P01019002	chr5:122982442-123000053_R	lincRNA:chr5:122982442-123000053 reverse strand	chr5:122982442-123000053_R	0.0438142	4.64456	1	0.038203	4.73936	0.871932	0.0547916	3.92211	1.25054	0.260255	17.4894	5.93997
mm|chr3:142236032-142236091	ref|NM_018734|ens|ENSMUST00000106222|ens|ENSMUST00000106221|ens|ENSMUST00000029935		A_55_P2472435	NM_018734	ref|Mus musculus guanylate binding protein 3 (Gbp3), mRNA [NM_018734]	Gbp3	0.162361	17.2112	1	0.138141	17.1374	0.850826	1.8324	131.167	11.286	0.963851	64.7719	5.93647
mm|chr8:94850560-94850501			A_30_P01021623	chr8:94841965-94881130_R	lincRNA:chr8:94841965-94881130 reverse strand	chr8:94841965-94881130_R	0.136905	14.5127	1	0.274772	34.0875	2.00702	0.355812	25.4698	2.59896	0.811614	54.5414	5.92829
mm|chr11:98107958-98108017	ref|NM_026952|ens|ENSMUST00000003203|gb|AY072295|tc|TC1580366		A_55_P1999187	NM_026952	ref|Mus musculus cyclin-dependent kinase 12 (Cdk12), transcript variant 3, mRNA [NM_026952]	Cdk12	0.0418101	4.43211	1	0.0371937	4.61415	0.889587	0.0518561	3.71198	1.24028	0.247791	16.6518	5.92658
mm|chr12:56701785-56701844	ref|NM_020287|ens|ENSMUST00000051857|gb|BC169243|tc|TC1628453		A_55_P2058335	NM_020287	ref|Mus musculus insulinoma-associated 2 (Insm2), mRNA [NM_020287]	Insm2	0.0581103	6.16003	1	0.173425	21.5146	2.98441	0.229061	16.3967	3.94182	0.344391	23.1434	5.9265
mm|chr1:82440796-82440855	ref|NM_029777|ref|NM_001122685|ens|ENSMUST00000165975|ens|ENSMUST00000140020		A_51_P229002	NM_029777	ref|Mus musculus rhomboid domain containing 1 (Rhbdd1), transcript variant 1, mRNA [NM_029777]	Rhbdd1	0.0475042	5.03572	1	0.175284	21.7452	3.68985	0.124163	8.88786	2.61372	0.281427	18.9122	5.92426
mm|chr9:72044530-72044471	ref|XM_003086743|ref|XM_980604		A_55_P2069915	XM_003086743	ref|PREDICTED: Mus musculus predicted gene 7866 (Gm7866), mRNA [XM_003086743]	Gm7866	0.0504139	5.34416	1	0.0442135	5.48501	0.87701	0.387375	27.7292	7.68389	0.296958	19.9559	5.8904
mm|chr3:93159438-93159497			A_30_P01028264	chr3:93159107-93159613_F	lincRNA:chr3:93159107-93159613 forward strand	chr3:93159107-93159613_F	0.0511026	5.41717	1	0.0441002	5.47095	0.862972	0.0658496	4.71366	1.28858	0.300768	20.2119	5.88556
mm|chr11:58268717-58268658	ref|NM_146878|ens|ENSMUST00000055204|gb|X89680|gb|AY043304		A_51_P497379	NM_146878	ref|Mus musculus olfactory receptor 30 (Olfr30), mRNA [NM_146878]	Olfr30	0.0459178	4.86755	1	0.0897699	11.1366	1.95501	0.166213	11.8979	3.6198	0.269594	18.117	5.87122
mm|chr4:124592897-124592956	ref|XM_003086373|ref|XM_003085430|tc|TC1690516|nap|NAP013397-001		A_55_P2176035	XM_003086373	ref|PREDICTED: Mus musculus ephrin type-A receptor 10-like (LOC100504449), mRNA [XM_003086373]	LOC100504449	0.0489887	5.19308	1	0.103472	12.8365	2.11216	0.196181	14.0431	4.00462	0.287467	19.3181	5.86804
mm|chr9:21719407-21719348	ref|NM_031874|ens|ENSMUST00000128442|ens|ENSMUST00000122211|ens|ENSMUST00000115351		A_51_P477738	NM_031874	ref|Mus musculus RAB3D, member RAS oncogene family (Rab3d), mRNA [NM_031874]	Rab3d	0.0557894	5.914	1	0.232074	28.7905	4.15982	0.26346	18.8591	4.72241	0.326947	21.9712	5.86038
mm|chr5:14933810-14933751	ref|NM_001122661|ens|ENSMUST00000159973		A_55_P2133191	NM_001122661	ref|Mus musculus spermatogenesis associated glutamate (E)-rich protein 4e (Speer4e), mRNA [NM_001122661]	Speer4e	0.0465113	4.93046	1	0.0398728	4.94651	0.857271	0.055622	3.98155	1.19588	0.272526	18.314	5.85935
mm|chr7:138469646-138469587	ref|NM_027037|gb|BC048596|gb|AK005730|gb|BU945694		A_51_P300395	NM_027037	ref|Mus musculus RIKEN cDNA 1700007K09 gene (1700007K09Rik), mRNA [NM_027037]	1700007K09Rik	0.0447465	4.74338	1	0.065635	8.14249	1.46682	0.158004	11.3103	3.5311	0.261789	17.5925	5.8505
mm|chr7:96781607-96781548	ens|ENSMUST00000172178|gb|AK038819|tc|TC1702423|tc|TC1595553		A_55_P2416934	ENSMUST00000172178	ens|RIKEN cDNA A230065N10 gene [Source:MGI Symbol;Acc:MGI:3642744] [ENSMUST00000172178]	ENSMUST00000172178	0.0485894	5.15075	1	0.043803	5.43408	0.901494	0.261646	18.7292	5.38484	0.284195	19.0982	5.84892
mm|chr8:85610643-85610584			A_30_P01020688	chr8:85609155-85615170_R	lincRNA:chr8:85609155-85615170 reverse strand	chr8:85609155-85615170_R	0.0498772	5.28727	1	0.044244	5.4888	0.887059	0.061344	4.39114	1.2299	0.290874	19.5471	5.83181
mm|chr10:39664691-39664632			A_30_P01019938	chr10:39659425-39674200_R	lincRNA:chr10:39659425-39674200 reverse strand	chr10:39659425-39674200_R	0.0435932	4.62113	1	0.0698442	8.66469	1.60218	0.0595133	4.2601	1.3652	0.254002	17.0692	5.82664
mm|chr5:138312162-138312103	ref|NM_001024932|ens|ENSMUST00000110977|ens|ENSMUST00000085889|ens|ENSMUST00000164886		A_55_P1970763	NM_001024932	ref|Mus musculus paired immunoglobin-like type 2 receptor beta 2 (Pilrb2), mRNA [NM_001024932]	Pilrb2	0.0442141	4.68695	1	0.0385795	4.78607	0.872563	0.055375	3.96386	1.25243	0.257212	17.2849	5.81741
mm|chr5:122057221-122055701	ref|NM_178799|gb|AK080793|gb|AK033963|ens|ENSMUST00000111776		A_52_P671700	NM_178799	ref|Mus musculus acyl-Coenzyme A dehydrogenase family, member 12 (Acad12), mRNA [NM_178799]	Acad12	0.0529221	5.61004	1	0.117106	14.5278	2.2128	0.0623291	4.46166	1.17775	0.307685	20.6768	5.81392
mm|chr4:41644466-41644407	ens|ENSMUST00000105155|ens|ENSMUST00000068970|ens|ENSMUST00000165573|ref|XM_001487791		A_55_P1987296	ENSMUST00000105155	ens|predicted gene 2500 [Source:MGI Symbol;Acc:MGI:3780667] [ENSMUST00000105155]	1700045I11Rik	0.0460417	4.88068	1	0.12649	15.692	2.74729	0.0943097	6.7509	2.04835	0.267399	17.9695	5.80777
mm|chr2:85664006-85664065	ref|NM_146586|ens|ENSMUST00000054201|tc|TC1600125|nap|NAP025054-001		A_55_P1954226	NM_146586	ref|Mus musculus olfactory receptor 1018 (Olfr1018), mRNA [NM_146586]	Olfr1018	0.0410255	4.34894	1	0.0362118	4.49233	0.882664	0.0570041	4.08048	1.38948	0.238168	16.0051	5.80536
mm|chr17:8093322-8093381			A_30_P01021041	chr17:8088950-8106700_F	lincRNA:chr17:8088950-8106700 forward strand	chr17:8088950-8106700_F	0.0414295	4.39177	1	0.099304	12.3194	2.39694	0.680807	48.7337	16.4329	0.240441	16.1579	5.80362
mm|chr3:19907511-19907570	ref|NM_001042611|ens|ENSMUST00000108329|gb|AK086999|ens|ENSMUST00000108328		A_55_P2087607	NM_001042611	ref|Mus musculus ceruloplasmin (Cp), transcript variant 1, mRNA [NM_001042611]	Cp	0.0523473	5.54912	1	0.0500009	6.20298	0.955175	0.288506	20.6519	5.51139	0.30348	20.3942	5.79742
mm|chr4:128731800-128731859			A_30_P01020118	chr4:128727332-128735227_F	lincRNA:chr4:128727332-128735227 forward strand	chr4:128727332-128735227_F	0.702042	74.4205	1	1.23251	152.901	1.7556	3.37271	241.426	4.80414	4.06527	273.191	5.79064
mm|chr16:21761973-21761914	ref|NM_023737|ens|ENSMUST00000023559|gb|AJ011864|gb|BC016899		A_51_P462918	NM_023737	ref|Mus musculus enoyl-Coenzyme A, hydratase/3-hydroxyacyl Coenzyme A dehydrogenase (Ehhadh), mRNA [NM_023737]	Ehhadh	0.0436177	4.62373	1	0.155116	19.2432	3.55626	0.290713	20.8099	6.66502	0.252529	16.9702	5.78959
mm|chr2:85448491-85448432	ref|NM_001011695|ens|ENSMUST00000099921|nap|NAP103651-1|nap|NAP108558-1		A_66_P100420	NM_001011695	ref|Mus musculus olfactory receptor 1000 (Olfr1000), mRNA [NM_001011695]	Olfr1000	0.0496664	5.26492	1	0.0429188	5.32439	0.864142	0.567121	40.5958	11.4186	0.287486	19.3194	5.78833
mm|chr13:49687847-49687906	ref|NM_012050|ens|ENSMUST00000065494|gb|AB007848|gb|BC095997		A_51_P342926	NM_012050	ref|Mus musculus osteomodulin (Omd), mRNA [NM_012050]	Omd	0.0498416	5.28349	1	0.094735	11.7526	1.90072	0.0649945	4.65245	1.30402	0.288289	19.3733	5.7841
mm|chr17:37333896-37333837	ref|NM_001011518|ens|ENSMUST00000055324|gb|BC139173|gb|BC139177		A_55_P2014406	NM_001011518	ref|Mus musculus olfactory receptor 94 (Olfr94), mRNA [NM_001011518]	Olfr94	0.0428534	4.5427	1	0.183217	22.7294	4.27544	0.295458	21.1496	6.89462	0.247819	16.6537	5.78295
mm|chr11:105850398-105850457	ref|NM_009598|ref|NM_207624|ens|ENSMUST00000001964|ens|ENSMUST00000132280		A_52_P68028	NM_009598	ref|Mus musculus angiotensin I converting enzyme (peptidyl-dipeptidase A) 1 (Ace), transcript variant 2, mRNA [NM_009598]	Ace	0.431272	45.7173	1	0.976921	121.194	2.26521	2.124	152.041	4.92497	2.49208	167.471	5.77845
mm|chr12:72107815-72107756			A_30_P01021915	chr12:72103832-72116875_R	lincRNA:chr12:72103832-72116875 reverse strand	chr12:72103832-72116875_R	0.0507261	5.37726	1	0.0485775	6.0264	0.957643	0.17789	12.7338	3.50687	0.293012	19.6907	5.77634
mm|chr7:16820160-16820101	ref|NM_176912|ref|NM_001146005|ens|ENSMUST00000098792|ens|ENSMUST00000171425		A_55_P2106106	NM_176912	ref|Mus musculus G protein-coupled receptor 77 (Gpr77), transcript variant 1, mRNA [NM_176912]	Gpr77	0.0434522	4.60618	1	0.17534	21.7521	4.03523	0.338791	24.2515	7.79687	0.250806	16.8544	5.77199
mm|chr14:35183556-35183497	ref|NM_011430|ens|ENSMUST00000023826|gb|AK141509|gb|BC028508		A_55_P2187076	NM_011430	ref|Mus musculus synuclein, gamma (Sncg), mRNA [NM_011430]	Sncg	3.66006	387.987	1	9.28973	1152.46	2.53814	15.8212	1132.52	4.32266	21.1085	1418.52	5.76726
mm|chr19:11171519-11171460	ref|NM_027058|ens|ENSMUST00000025635|gb|AK006056|tc|TC1587873		A_51_P195567	NM_027058	ref|Mus musculus RIKEN cDNA 1700017D01 gene (1700017D01Rik), mRNA [NM_027058]	1700017D01Rik	0.0625394	6.62954	1	0.0399997	4.96226	0.639592	0.0561226	4.01738	0.897395	0.360541	24.2287	5.76501
mm|chr13:48581220-48581279			A_30_P01032217	chr13:48576557-48581632_F	lincRNA:chr13:48576557-48581632 forward strand	chr13:48576557-48581632_F	0.0574467	6.08968	1	0.0427787	5.30702	0.744669	0.145895	10.4435	2.53966	0.330863	22.2343	5.75948
mm|chr12:112223496-112223555			A_30_P01027126	chr12:112223388-112223755_F	lincRNA:chr12:112223388-112223755 forward strand	chr12:112223388-112223755_F	0.0442899	4.69499	1	0.0368638	4.57322	0.832329	0.169633	12.1427	3.83007	0.254588	17.1086	5.74821
mm|chr10:16641748-16641807			A_30_P01033001	chr10:16603950-16794075_F	lincRNA:chr10:16603950-16794075 forward strand	chr10:16603950-16794075_F	0.0446271	4.73073	1	0.039597	4.9123	0.887286	0.0698791	5.00211	1.56585	0.256193	17.2164	5.74074
mm|chr12:101173351-101173410	ens|ENSMUST00000095477|ens|ENSMUST00000151019|gb|AK033868|tc|TC1594143		A_55_P2017441	ENSMUST00000095477	ens|tyrosyl-DNA phosphodiesterase 1 [Source:MGI Symbol;Acc:MGI:1920036] [ENSMUST00000095477]	Tdp1	0.0640008	6.78445	1	0.129344	16.046	2.02097	0.286152	20.4834	4.47107	0.366896	24.6558	5.73268
mm|chr13:55514826-55514885	ref|NM_011392|ens|ENSMUST00000116411|ens|ENSMUST00000057167|gb|BC020529		A_55_P1991891	NM_011392	ref|Mus musculus solute carrier family 34 (sodium phosphate), member 1 (Slc34a1), mRNA [NM_011392]	Slc34a1	0.0575391	6.09947	1	0.219531	27.2344	3.81533	0.234797	16.8073	4.08065	0.329825	22.1646	5.73219
mm|chr14:49289011-49289070			A_30_P01018492	chr14:49288962-49413023_F	lincRNA:chr14:49288962-49413023 forward strand	chr14:49288962-49413023_F	0.0501534	5.31655	1	0.0439788	5.45589	0.876885	0.0631936	4.52354	1.26001	0.287431	19.3157	5.73103
mm|chr15:103329100-103329159	ref|NM_153505|ens|ENSMUST00000047405|ens|ENSMUST00000170900|gb|AK037534		A_51_P119429	NM_153505	ref|Mus musculus NCK associated protein 1 like (Nckap1l), mRNA [NM_153505]	Nckap1l	0.0509099	5.39674	1	0.0931275	11.5531	1.82926	0.0653111	4.67512	1.28288	0.291702	19.6027	5.72977
mm|chr6:121058345-121058286			A_30_P01030210	chr6:121035524-121061074_R	lincRNA:chr6:121035524-121061074 reverse strand	chr6:121035524-121061074_R	0.0477221	5.05882	1	0.140429	17.4213	2.94265	0.0588181	4.21033	1.23251	0.273428	18.3747	5.72958
mm|chr16:38396346-38396287	ref|NM_134102|ens|ENSMUST00000002926|gb|BC003470|gb|AF063498		A_51_P381618	NM_134102	ref|Mus musculus phospholipase A1 member A (Pla1a), mRNA [NM_134102]	Pla1a	2.64876	280.784	1	7.15737	887.923	2.70215	10.4053	744.836	3.92836	15.1741	1019.72	5.72875
mm|chr5:113339722-113339663	ref|NM_177078|ens|ENSMUST00000065167|gb|AK134672|gb|CJ260913		A_51_P108581	NM_177078	ref|Mus musculus adrenergic receptor kinase, beta 2 (Adrbk2), transcript variant 1, mRNA [NM_177078]	Adrbk2	0.0562183	5.95946	1	0.0681516	8.45471	1.21227	0.0629843	4.50856	1.12035	0.322056	21.6425	5.72867
mm|chr17:33442141-33442200			A_30_P01023374	chr17:33425193-33449090_F	lincRNA:chr17:33425193-33449090 forward strand	chr17:33425193-33449090_F	0.177657	18.8327	1	0.0357686	4.43735	0.201335	0.0494588	3.54037	0.278394	1.01725	68.3604	5.72592
mm|chr17:22685027-22684968	ref|NM_001104573|ens|ENSMUST00000092491|gb|AB540944|nap|NAP102349-1		A_55_P1952182	NM_001104573	ref|Mus musculus vomeronasal 2, receptor 111 (Vmn2r111), mRNA [NM_001104573]	Vmn2r111	0.275063	29.1582	1	0.365381	45.3282	1.32836	1.11844	80.0607	4.06614	1.57123	105.588	5.71226
mm|chr8:27199700-27199759	ens|ENSMUST00000144750|gb|AK019763|tc|TC1666336|riken|4930554C15		A_55_P2149826	ENSMUST00000144750	ens|RIKEN cDNA 1700047A11 gene [Source:MGI Symbol;Acc:MGI:1923854] [ENSMUST00000144750]	ENSMUST00000144750	0.169035	17.9187	1	0.318381	39.4974	1.88352	0.845641	60.5329	5.00276	0.964962	64.8465	5.70866
mm|chr4:146348119-146348060			A_30_P01027026	chr4:146345650-146356650_R	lincRNA:chr4:146345650-146356650 reverse strand	chr4:146345650-146356650_R	0.0441153	4.67647	1	0.0870301	10.7967	1.97279	0.0552494	3.95488	1.25239	0.251702	16.9147	5.70556
mm|chr1:164894129-164894070	ref|NM_008030|ens|ENSMUST00000067861|ens|ENSMUST00000142759|ens|ENSMUST00000028010		A_55_P2059586	NM_008030	ref|Mus musculus flavin containing monooxygenase 3 (Fmo3), mRNA [NM_008030]	Fmo3	0.044984	4.76856	1	0.115105	14.2796	2.5588	0.525613	37.6246	11.6844	0.256628	17.2457	5.70487
mm|chr15:92196395-92196336			A_30_P01026489	chr15:92174226-92201201_R	lincRNA:chr15:92174226-92201201 reverse strand	chr15:92174226-92201201_R	0.0557364	5.90837	1	0.0481142	5.96892	0.863246	0.0670582	4.80018	1.20313	0.317781	21.3553	5.70151
mm|chr14:105991942-105991883			A_30_P01029141	chr14:105987405-106063477_R	lincRNA:chr14:105987405-106063477 reverse strand	chr14:105987405-106063477_R	0.0419249	4.44428	1	0.0365567	4.53512	0.871957	0.080735	5.77919	1.92571	0.238722	16.0424	5.69403
mm|chr15:36878868-36878927	gb|BY718677|tc|TC1715189		A_55_P1954555	BY718677	gb|BY718677 RIKEN full-length enriched, adult male medulla oblongata Mus musculus cDNA clone 6330562O08 5'. [BY718677]	BY718677	0.240389	25.4826	1	0.434855	53.947	1.80897	1.05319	75.3899	4.3812	1.36843	91.9598	5.69256
mm|chr7:111078364-111078423	ref|NM_146959|ens|ENSMUST00000167269|ens|ENSMUST00000059011|nap|NAP057865-1		A_55_P1964245	NM_146959	ref|Mus musculus olfactory receptor 631 (Olfr631), mRNA [NM_146959]	Olfr631	0.0424438	4.49928	1	0.0374733	4.64884	0.882894	0.0525267	3.75998	1.23756	0.241393	16.2219	5.68736
mm|chr15:76498567-76498626	ref|NM_010630|ens|ENSMUST00000004294|gb|D49545|tc|TC1580057		A_55_P2149500	NM_010630	ref|Mus musculus kinesin family member C2 (Kifc2), mRNA [NM_010630]	Kifc2	0.0513581	5.44425	1	0.441993	54.8324	8.6061	0.36623	26.2156	7.13092	0.291923	19.6175	5.68407
mm|chr9:38281146-38281205	ref|NM_146804|ens|ENSMUST00000051111|gb|BC150476|tc|NP646788		A_55_P2186778	NM_146804	ref|Mus musculus olfactory receptor 905 (Olfr905), mRNA [NM_146804]	Olfr905	0.0422424	4.47793	1	0.0362394	4.49577	0.857893	0.0498502	3.56839	1.1801	0.239331	16.0833	5.66565
mm|chr19:9158256-9158197	ref|NM_011681|ens|ENSMUST00000025554|gb|X67702|gb|AK145844		A_51_P128575	NM_011681	ref|Mus musculus secretoglobin, family 1A, member 1 (uteroglobin) (Scgb1a1), mRNA [NM_011681]	Scgb1a1	0.0542784	5.75382	1	0.123114	15.2732	2.2682	0.104255	7.46278	1.92074	0.306936	20.6265	5.65485
mm|chr14:70554747-70554688	ref|NM_001004155|ref|NM_001112735|ens|ENSMUST00000140314|ens|ENSMUST00000058240		A_52_P421713	NM_001004155	ref|Mus musculus RIKEN cDNA 9930012K11 gene (9930012K11Rik), transcript variant 1, mRNA [NM_001004155]	9930012K11Rik	0.052729	5.58958	1	0.184318	22.866	3.49557	0.336391	24.0796	6.37962	0.29773	20.0078	5.64641
mm|chr10:86955161-86955102	ref|NM_008553|ens|ENSMUST00000020243|gb|AK141866|gb|M95603		A_51_P437327	NM_008553	ref|Mus musculus achaete-scute complex homolog 1 (Drosophila) (Ascl1), mRNA [NM_008553]	Ascl1	0.154962	16.4268	1	0.224083	27.7992	1.44606	0.369927	26.4802	2.38722	0.87488	58.7929	5.64578
mm|chr1:135806914-135806855	gb|AK037150|riken|A030001H09|nap|NAP004180-001		A_55_P2144736	AK037150	gb|Mus musculus 6 days neonate skin cDNA, RIKEN full-length enriched library, clone:A030001H09 product:proline arginine-rich end leucine-rich repeat, full insert sequence. [AK037150]	Prelp	0.0500701	5.30771	1	0.125477	15.5664	2.50604	0.129456	9.26677	2.5855	0.282219	18.9655	5.63649
mm|chr15:9300203-9300262	ref|NM_144845|ens|ENSMUST00000072403|gb|AK050128|gb|BC024453		A_51_P267063	NM_144845	ref|Mus musculus UDP glycosyltransferases 3 family, polypeptide A2 (Ugt3a2), mRNA [NM_144845]	Ugt3a2	0.0520867	5.52148	1	0.0826039	10.2476	1.58589	0.184394	13.1993	3.54013	0.293511	19.7243	5.63506
mm|chr9:50365486-50365427	ref|NM_025687|ens|ENSMUST00000034568|gb|BC048458|gb|AF285582		A_51_P116609	NM_025687	ref|Mus musculus testis expressed gene 12 (Tex12), mRNA [NM_025687]	Tex12	0.0435826	4.62001	1	0.0381651	4.73466	0.875696	0.0541163	3.87376	1.24169	0.245138	16.4736	5.62468
mm|chr3:127201640-127201581	ens|ENSMUST00000104965|tc|TC1698674		A_55_P2096355	ENSMUST00000104965	ens|predicted gene 4392 [Source:MGI Symbol;Acc:MGI:3782577] [ENSMUST00000104965]	Gm4392	0.0661743	7.01486	1	0.351839	43.6482	5.31685	0.334716	23.9597	5.05809	0.37198	24.9975	5.62121
mm|chr15:10367612-10367553			A_30_P01028716	chr15:10367307-10370076_R	lincRNA:chr15:10367307-10370076 reverse strand	chr15:10367307-10370076_R	0.0486118	5.15313	1	0.0426579	5.29202	0.877522	0.0579084	4.14521	1.19124	0.273221	18.3607	5.62046
mm|chr5:089928177-089928118			A_55_P2131433	A_55_P2131433	Unknown	A_55_P2131433	0.949591	100.662	1	1.26249	156.621	1.32951	3.95926	283.413	4.16944	5.33436	358.475	5.61754
mm|chr16:22961425-22961484	ref|NM_053176|ens|ENSMUST00000023590|gb|AF194028|gb|AY135662		A_51_P506309	NM_053176	ref|Mus musculus histidine-rich glycoprotein (Hrg), mRNA [NM_053176]	Hrg	0.083312	8.83155	1	0.165131	20.4857	1.98208	0.32626	23.3544	3.91612	0.467881	31.4421	5.61601
mm|chr19:14477637-14477578	gb|AK083177|tc|TC1693273|riken|C630023P03|nap|NAP077212-1		A_55_P2027288	AK083177	gb|Mus musculus adult male hippocampus cDNA, RIKEN full-length enriched library, clone:C630023P03 product:hypothetical protein, full insert sequence. [AK083177]	Gm8630	0.11944	12.6613	1	0.136787	16.9695	1.14524	0.492979	35.2885	4.12742	0.670355	45.0486	5.61249
mm|chr8:73674563-73674622	gb|AK133183|riken|4931433I17		A_55_P2030116	AK133183	gb|Mus musculus adult male testis cDNA, RIKEN full-length enriched library, clone:4931433I17 product:unclassifiable, full insert sequence. [AK133183]	AK133183	0.0494219	5.239	1	0.0498516	6.18446	1.0087	0.0625903	4.48036	1.26645	0.27726	18.6322	5.61006
mm|chrX:69217291-69217350	ref|NM_001081135|ens|ENSMUST00000048790|gb|BC060135|gb|AK079502		A_52_P293120	NM_001081135	ref|Mus musculus proline rich Gla (G-carboxyglutamic acid) 3 (transmembrane) (Prrg3), mRNA [NM_001081135]	Prrg3	0.172646	18.3015	1	0.430526	53.4099	2.49369	0.621742	44.5057	3.60125	0.96719	64.9962	5.60215
mm|chr6:86224838-86224897	ref|NM_031199|ens|ENSMUST00000032066|gb|U65016|gb|AK162680		A_51_P415126	NM_031199	ref|Mus musculus transforming growth factor alpha (Tgfa), mRNA [NM_031199]	Tgfa	0.0497372	5.27243	1	0.19668	24.3996	3.95438	0.0914741	6.54792	1.83915	0.278451	18.7122	5.59845
mm|chr9:106177470-106177529			A_30_P01020533	chr9:106170918-106177894_F	lincRNA:chr9:106170918-106177894 forward strand	chr9:106170918-106177894_F	0.0422535	4.47911	1	0.129429	16.0567	3.06316	0.123744	8.8579	2.92862	0.236535	15.8954	5.59799
mm|chr7:109164159-109164100	ref|NM_010531|ens|ENSMUST00000094134|gb|AF110802|gb|AK009721		A_52_P577384	NM_010531	ref|Mus musculus interleukin 18 binding protein (Il18bp), mRNA [NM_010531]	Il18bp	0.0651193	6.90302	1	0.156922	19.4673	2.40976	0.352555	25.2367	5.41398	0.363953	24.4581	5.58902
mm|chr9:119517644-119517585	ref|NM_001205321|ref|NM_009134|ens|ENSMUST00000084787|gb|Y09108		A_55_P2109397	NM_001205321	ref|Mus musculus sodium channel, voltage-gated, type X, alpha (Scn10a), transcript variant 1, mRNA [NM_001205321]	Scn10a	0.0572954	6.07364	1	0.0493624	6.12376	0.861542	0.0679664	4.86519	1.18625	0.320074	21.5093	5.58638
mm|chr16:3876339-3876398			A_30_P01026556	chr16:3872469-3877048_F	lincRNA:chr16:3872469-3877048 forward strand	chr16:3872469-3877048_F	0.10307	10.926	1	0.208298	25.8409	2.02094	0.433094	31.0019	4.20196	0.575752	38.6912	5.58605
mm|chr3:133899791-133899850	ref|NM_001004367|ens|ENSMUST00000166288|ref|XM_001472437|gb|BC067052		A_55_P2070603	NM_001004367	ref|Mus musculus CXXC finger 4 (Cxxc4), mRNA [NM_001004367]	Cxxc4	0.0456663	4.84089	1	0.0903498	11.2086	1.97848	0.0669335	4.79125	1.46571	0.254987	17.1354	5.58371
mm|chr1:94655909-94655850			A_30_P01030847	chr1:94655789-94657057_R	lincRNA:chr1:94655789-94657057 reverse strand	chr1:94655789-94657057_R	0.0400967	4.25047	1	0.0351423	4.35965	0.876438	0.0493492	3.53253	1.23076	0.22317	14.9973	5.56579
mm|chr16:38085272-38085213	ref|NR_033221|gb|AK169533|gb|AK145079|tc|TC1701608		A_55_P2417961	NR_033221	ref|Mus musculus cDNA sequence BC031361 (BC031361), non-coding RNA [NR_033221]	BC031361	0.0465327	4.93273	1	0.0399868	4.96066	0.859328	0.312197	22.3478	6.7092	0.25856	17.3755	5.55651
mm|chr2:164215236-164215177	ref|NM_013592|ref|NM_001252563|ens|ENSMUST00000103103|ens|ENSMUST00000103104		A_55_P2171206	NM_013592	ref|Mus musculus matrilin 4 (Matn4), transcript variant 1, mRNA [NM_013592]	Matn4	0.0508344	5.38873	1	0.155597	19.3029	3.06086	0.184375	13.198	3.62699	0.282389	18.9768	5.55508
mm|chr13:83880591-83880650	gb|AK029460|gb|AK048540|gb|BG247185|tc|TC1581727		A_52_P209944	AK029460	gb|Mus musculus 0 day neonate head cDNA, RIKEN full-length enriched library, clone:4833441G08 product:hypothetical protein, full insert sequence. [AK029460]	C130071C03Rik	0.0525311	5.5686	1	0.0455487	5.65065	0.86708	0.0628548	4.49929	1.19652	0.291742	19.6054	5.55369
mm|chr17:26913057-26913116			A_30_P01021398	chr17:26911397-26917047_F	lincRNA:chr17:26911397-26917047 forward strand	chr17:26911397-26917047_F	0.136246	14.4428	1	0.341213	42.33	2.50439	0.373606	26.7436	2.74215	0.756342	50.827	5.5513
mm|chr6:41069137-41069196	ens|ENSMUST00000103269|gb|AY056584|gb|M13673|gb|M27349		A_55_P2087292	ENSMUST00000103269	ens|T-cell receptor beta, variable 12-2 [Source:MGI Symbol;Acc:MGI:98601] [ENSMUST00000103269]	ENSMUST00000103269	0.0690699	7.3218	1	0.15019	18.6322	2.17447	0.157076	11.2439	2.27417	0.383109	25.7454	5.54669
mm|chr14:93413487-93413428	ref|NM_001081377|gb|AK147451|gb|BC172098|gb|BC157952		A_51_P475704	NM_001081377	ref|Mus musculus protocadherin 9 (Pcdh9), mRNA [NM_001081377]	Pcdh9	0.197802	20.9682	1	0.536278	66.5291	2.71118	1.20927	86.562	6.11352	1.09319	73.4634	5.52667
mm|chr14:56168027-56168086	ref|NM_028994|ens|ENSMUST00000048781|gb|AK147972|gb|AK165094		A_51_P110888	NM_028994	ref|Mus musculus phosphoenolpyruvate carboxykinase 2 (mitochondrial) (Pck2), nuclear gene encoding mitochondrial protein, mRNA [NM_028994]	Pck2	0.101305	10.7389	1	0.305485	37.8976	3.01551	0.277667	19.876	2.74091	0.559344	37.5885	5.52141
mm|chr2:87649979-87650038	ref|NM_146320|ens|ENSMUST00000090707|tc|TC1600137|nap|NAP021698-001		A_52_P372090	NM_146320	ref|Mus musculus olfactory receptor 1145 (Olfr1145), mRNA [NM_146320]	Olfr1145	0.0453057	4.80266	1	0.0825982	10.2469	1.82313	0.0563394	4.0329	1.24354	0.250006	16.8007	5.51821
mm|chr4:128242752-128242693			A_30_P01033018	chr4:128207615-128242898_R	lincRNA:chr4:128207615-128242898 reverse strand	chr4:128207615-128242898_R	0.0495722	5.25493	1	0.0428343	5.3139	0.864079	0.669799	47.9457	13.5116	0.273174	18.3576	5.51063
mm|chr1:87404544-87404603			A_30_P01017909	chr1:87374975-87412500_F	lincRNA:chr1:87374975-87412500 forward strand	chr1:87374975-87412500_F	0.0535169	5.6731	1	0.270539	33.5624	5.05521	0.269843	19.316	5.0422	0.294661	19.8015	5.50594
mm|chr12:55885008-55885067			A_30_P01023798	chr12:55844075-55898175_F	lincRNA:chr12:55844075-55898175 forward strand	chr12:55844075-55898175_F	0.0454844	4.82161	1	0.272167	33.7643	5.98374	0.119177	8.53097	2.62018	0.249882	16.7923	5.49379
mm|chr8:109032939-109032998	ref|XR_035325|ref|XR_035344|gb|AK031558|tc|TC1594710		A_52_P120132	XR_035325	ref|PREDICTED: Mus musculus RIKEN cDNA 6030452D12 gene (6030452D12Rik), miscRNA [XR_035325]	6030452D12Rik	0.0649721	6.88742	1	0.0551207	6.83812	0.848374	0.111384	7.97309	1.71433	0.356863	23.9816	5.49255
mm|chr2:45553885-45553944	ref|NR_040497|ens|ENSMUST00000153567|gb|AK006114|tc|TC1638222		A_55_P2285216	NR_040497	ref|Mus musculus RIKEN cDNA 1700019E08 gene (1700019E08Rik), non-coding RNA [NR_040497]	1700019E08Rik	0.0574381	6.08877	1	0.0494992	6.14074	0.861784	0.067613	4.83989	1.17714	0.315336	21.1909	5.49002
mm|chr1_random:001038585-001038526			A_55_P2058092	A_55_P2058092	Unknown	A_55_P2058092	0.0592743	6.28342	1	0.0532029	6.6002	0.89757	0.223392	15.9909	3.76878	0.325227	21.8556	5.48681
mm|chr5:123583657-123583598			A_30_P01022738	chr5:123582742-123588117_R	lincRNA:chr5:123582742-123588117 reverse strand	chr5:123582742-123588117_R	0.0432502	4.58477	1	0.083669	10.3798	1.93453	0.236245	16.911	5.46229	0.237052	15.9302	5.48095
mm|chr13:42403101-42403160	ref|NM_010104|ens|ENSMUST00000021796|gb|AK040778|gb|AK153437		A_51_P115005	NM_010104	ref|Mus musculus endothelin 1 (Edn1), mRNA [NM_010104]	Edn1	0.22592	23.9489	1	0.257726	31.9728	1.14078	1.49553	107.054	6.61973	1.23783	83.1836	5.47906
mm|chr3:19889071-19889130	ref|NM_007752|ens|ENSMUST00000129135|ens|ENSMUST00000091309|gb|AK014835		A_55_P2111302	NM_007752	ref|Mus musculus ceruloplasmin (Cp), transcript variant 2, mRNA [NM_007752]	Cp	2.84077	301.138	1	0.699421	86.7682	0.246208	13.8782	993.432	4.88535	15.547	1044.77	5.47279
mm|chr18:44243200-44243259	ref|NM_001013797|ens|ENSMUST00000068473|gb|AK028032|gb|AV022346		A_51_P432607	NM_001013797	ref|Mus musculus serine peptidase inhibitor, Kazal type 6 (Spink6), mRNA [NM_001013797]	Spink6	0.0427316	4.52979	1	0.0377891	4.68802	0.884337	0.0529099	3.78741	1.23819	0.233831	15.7137	5.4721
mm|chr8:63895308-63895249	gb|AK017489|riken|5730405A17|nap|NAP073019-1		A_55_P2280316	AK017489	gb|Mus musculus 8 days embryo whole body cDNA, RIKEN full-length enriched library, clone:5730405A17 product:unclassifiable, full insert sequence. [AK017489]	5730405A17Rik	0.0551952	5.851	1	0.0480338	5.95894	0.870253	0.0652257	4.669	1.18173	0.30168	20.2732	5.4657
mm|chr7:100195518-100195459			A_30_P01021983	chr7:100195448-100195894_R	lincRNA:chr7:100195448-100195894 reverse strand	chr7:100195448-100195894_R	0.04482	4.75117	1	0.0397391	4.92993	0.886639	0.0550308	3.93923	1.22782	0.24464	16.4401	5.45829
mm|chr11:98913334-98913393	ref|NM_010517|ens|ENSMUST00000017637|gb|S80566|gb|AK150229		A_52_P257502	NM_010517	ref|Mus musculus insulin-like growth factor binding protein 4 (Igfbp4), mRNA [NM_010517]	Igfbp4	0.812896	86.1716	1	2.47771	307.378	3.048	2.99361	214.289	3.68265	4.43582	298.092	5.45681
mm|chr9:40030812-40030753			A_30_P01024715	chr9:40029344-40050160_R	lincRNA:chr9:40029344-40050160 reverse strand	chr9:40029344-40050160_R	0.0689396	7.30799	1	0.117233	14.5436	1.70051	0.0713705	5.10886	1.03526	0.375968	25.2654	5.45358
mm|chr5:66391659-66391600	ref|NR_027961|ens|ENSMUST00000147882|gb|BC096478|gb|AK033717		A_51_P206165	NR_027961	ref|Mus musculus RIKEN cDNA 9130230L23 gene (9130230L23Rik), non-coding RNA [NR_027961]	9130230L23Rik	0.0440817	4.67292	1	0.0384258	4.767	0.871694	0.055128	3.94618	1.25058	0.240223	16.1433	5.44949
mm|chr7:52900705-52900764	ref|NM_172418|ens|ENSMUST00000153706|ens|ENSMUST00000098455|ens|ENSMUST00000150045		A_51_P122141	NM_172418	ref|Mus musculus MEF2 activating motif and SAP domain containing transcriptional regulator (Mamstr), mRNA [NM_172418]	Mamstr	0.0882749	9.35764	1	0.195107	24.2045	2.21023	0.586804	42.0047	6.64746	0.480942	32.3198	5.44823
mm|chr4:43783449-43783390	ref|NM_019476|ens|ENSMUST00000053931|gb|AY043305|gb|BC113135		A_51_P112682	NM_019476	ref|Mus musculus olfactory receptor 159 (Olfr159), mRNA [NM_019476]	Olfr159	0.0452056	4.79205	1	0.113916	14.132	2.51994	0.198233	14.1899	4.38513	0.246236	16.5474	5.44703
mm|chr19:53535011-53534952			A_30_P01030387	chr19:53517903-53540753_R	lincRNA:chr19:53517903-53540753 reverse strand	chr19:53517903-53540753_R	0.103982	11.0227	1	0.0497633	6.1735	0.478577	0.0673076	4.81803	0.647302	0.566353	38.0595	5.44666
mm|chr16:97782327-97782386	ref|NM_013606|ref|NR_003508|ens|ENSMUST00000024112|gb|BC007127		A_51_P514085	NM_013606	ref|Mus musculus myxovirus (influenza virus) resistance 2 (Mx2), mRNA [NM_013606]	Mx2	0.0491556	5.21077	1	0.0441925	5.4824	0.899033	0.494069	35.3666	10.0511	0.26748	17.9749	5.4415
mm|chr2:10177988-10178047	ref|NM_172471|ens|ENSMUST00000026886|gb|AK018605|tc|TC1599567		A_55_P2077048	NM_172471	ref|Mus musculus inter-alpha (globulin) inhibitor H5 (Itih5), mRNA [NM_172471]	Itih5	0.0545364	5.78117	1	0.108049	13.4042	1.98122	0.245928	17.6041	4.50943	0.296513	19.926	5.43697
mm|chrX:50094826-50094885			A_30_P01032316	chrX:50087925-50101700_F	lincRNA:chrX:50087925-50101700 forward strand	chrX:50087925-50101700_F	0.0548145	5.81065	1	0.0467406	5.79851	0.852705	0.0639447	4.57731	1.16657	0.297917	20.0204	5.43501
mm|chr17:024569120-024569179	tc|TC1769533		A_55_P2077836	TC1769533	tc|BC031479 Als2 protein {Mus musculus} (exp=-1; wgp=0; cg=0), partial (5%) [TC1769533]	TC1769533	0.0508497	5.39035	1	0.0632098	7.84163	1.24307	0.357533	25.593	7.03118	0.276283	18.5665	5.43333
mm|chr4:146968049-146967990			A_30_P01029444	chr4:146965675-146979325_R	lincRNA:chr4:146965675-146979325 reverse strand	chr4:146965675-146979325_R	0.0485323	5.1447	1	0.0425462	5.27817	0.876659	0.0611463	4.37699	1.25991	0.262865	17.6648	5.41628
mm|chr11:54923856-54923915	ref|NM_010299|ens|ENSMUST00000000608|gb|AK152256|gb|U09816		A_52_P353417	NM_010299	ref|Mus musculus GM2 ganglioside activator protein (Gm2a), mRNA [NM_010299]	Gm2a	0.0583557	6.18604	1	0.240582	29.846	4.12269	0.32061	22.95	5.49406	0.316068	21.2401	5.41624
mm|chr7:52666474-52666533	ref|NM_010596|ens|ENSMUST00000107774|tc|TC1589973|nap|NAP122732-1		A_66_P114700	NM_010596	ref|Mus musculus potassium voltage-gated channel, shaker-related subfamily, member 7 (Kcna7), mRNA [NM_010596]	Kcna7	0.0516504	5.47524	1	0.189323	23.4869	3.66547	0.172753	12.3661	3.34466	0.279749	18.7995	5.4162
mm|chr15:74989023-74989082	ens|ENSMUST00000023246|ref|XM_001475753|ref|XM_909927|tc|NP063235		A_55_P2095311	ENSMUST00000023246	ens|lymphocyte antigen 6 complex, locus G [Source:MGI Symbol;Acc:MGI:109440] [ENSMUST00000023246]	Ly6g	4.21559	446.877	1	14.8092	1837.18	3.51295	21.6869	1552.39	5.14444	22.818	1533.4	5.41278
mm|chr6:133054046-133054105			A_30_P01025362	chr6:133054045-133058002_F	lincRNA:chr6:133054045-133058002 forward strand	chr6:133054045-133058002_F	0.0487871	5.17171	1	0.042383	5.25792	0.868733	0.0610715	4.37164	1.2518	0.263838	17.7302	5.40794
mm|chr1:175398876-175398817	ref|XM_136331|ens|ENSMUST00000037976|tc|TC1691508		A_55_P2004007	XM_136331	ref|PREDICTED: Mus musculus predicted gene 4955 (Gm4955), mRNA [XM_136331]	Gm4955	0.0446947	4.73789	1	0.0391045	4.8512	0.874926	0.133856	9.58174	2.99491	0.241555	16.2327	5.40455
mm|chr16:69857314-69857255	ref|NM_173069|ref|NM_001037919|ref|NM_027650|ens|ENSMUST00000076500		A_55_P2070199	NM_173069	ref|Mus musculus spermatogenesis associated glutamate (E)-rich protein 2 (Speer2), mRNA [NM_173069]	Speer2	0.0527157	5.58816	1	0.202627	25.1373	3.84377	0.346107	24.7751	6.56555	0.284882	19.1444	5.40413
mm|chr9:41420788-41420847	ref|XR_108069|ref|XR_105251|gb|AK084170|riken|D230004N17		A_55_P2044433	XR_108069	ref|PREDICTED: Mus musculus hypothetical LOC100504017 (LOC100504017), partial miscRNA [XR_108069]	LOC100504017	0.0670493	7.10761	1	0.0486239	6.03215	0.725196	0.193002	13.8155	2.87851	0.362083	24.3324	5.40025
mm|chr5:110741964-110742023	ref|NM_011132|ens|ENSMUST00000007296|gb|AK141674|gb|AK143509		A_55_P2455460	NM_011132	ref|Mus musculus polymerase (DNA directed), epsilon (Pole), mRNA [NM_011132]	Pole	0.0495959	5.25745	1	0.0434853	5.39466	0.876791	0.0624462	4.47004	1.2591	0.267789	17.9957	5.39941
mm|chr6:124574801-124574742	ref|NM_173864|ref|NM_144938|ref|NM_001097617|ens|ENSMUST00000068797		A_55_P2150179	NM_173864	ref|Mus musculus predicted gene 5077 (Gm5077), mRNA [NM_173864]	Gm5077	2.13504	226.327	1	2.07439	257.343	0.971591	8.00654	573.126	3.75006	11.5265	774.593	5.39872
mm|chr6:52056814-52056755			A_30_P01031494	chr6:52046805-52072744_R	lincRNA:chr6:52046805-52072744 reverse strand	chr6:52046805-52072744_R	0.043462	4.60722	1	0.0612711	7.60113	1.40976	0.0536803	3.84256	1.23511	0.234561	15.7628	5.39693
mm|chr19:42118566-42118625	ref|NM_020033|ens|ENSMUST00000026172|gb|BC138760|gb|BC138761		A_51_P295315	NM_020033	ref|Mus musculus ankyrin repeat domain 2 (stretch responsive muscle) (Ankrd2), mRNA [NM_020033]	Ankrd2	0.0512408	5.43182	1	0.0478916	5.9413	0.934637	0.0663002	4.74592	1.29389	0.276358	18.5715	5.39331
mm|chr5:148040233-148040174	ref|NR_038157|ens|ENSMUST00000174285|gb|AK008755|tc|TC1599578		A_55_P2295731	NR_038157	ref|Mus musculus RIKEN cDNA 2210019I11 gene (2210019I11Rik), non-coding RNA [NR_038157]	2210019I11Rik	0.0414842	4.39757	1	0.0527613	6.54542	1.27184	0.0890537	6.37467	2.14669	0.223318	15.0072	5.38319
mm|chr6:31078862-31078803			A_30_P01029853	chr6:31078802-31079644_R	lincRNA:chr6:31078802-31079644 reverse strand	chr6:31078802-31079644_R	0.0700993	7.43093	1	0.280027	34.7394	3.99471	0.664408	47.5598	9.47809	0.376915	25.3291	5.37686
mm|chr13:56639037-56639096	ref|NM_178674|ens|ENSMUST00000045428|ens|ENSMUST00000128668|gb|AK085598		A_51_P456838	NM_178674	ref|Mus musculus F-box and leucine-rich repeat protein 21 (Fbxl21), mRNA [NM_178674]	Fbxl21	0.0441129	4.67622	1	0.0860614	10.6765	1.95093	0.245957	17.6062	5.57562	0.237081	15.9321	5.37441
mm|chr19:6275987-6275928			A_30_P01019235	chr19:6268793-6276607_R	lincRNA:chr19:6268793-6276607 reverse strand	chr19:6268793-6276607_R	0.0444562	4.71261	1	0.200074	24.8206	4.50048	0.171561	12.2807	3.85909	0.238844	16.0506	5.37256
mm|chr15:102438184-102438125	gb|AK017951|tc|TC1774198|riken|5830427D02		A_55_P2295951	AK017951	gb|Mus musculus adult male thymus cDNA, RIKEN full-length enriched library, clone:5830427D02 product:unclassifiable, full insert sequence. [AK017951]	5830427D02Rik	0.0563895	5.97761	1	0.111795	13.869	1.98255	0.242732	17.3753	4.30456	0.302807	20.349	5.36993
mm|chr7:3959734-3959675	ref|NM_001113474|ref|NM_178611|ens|ENSMUST00000086401|ens|ENSMUST00000086400		A_55_P1991214	NM_001113474	ref|Mus musculus leukocyte-associated Ig-like receptor 1 (Lair1), transcript variant a, mRNA [NM_001113474]	Lair1	0.443279	46.9901	1	0.547191	67.8831	1.23442	1.97166	141.136	4.4479	2.37943	159.9	5.3678
mm|chrX:91602561-91602502	ens|ENSMUST00000113902		A_55_P1989718	ENSMUST00000113902	ens|RIKEN cDNA 4932442L08 gene [Source:MGI Symbol;Acc:MGI:1921682] [ENSMUST00000113902]	ENSMUST00000113902	0.0529372	5.61165	1	0.0463081	5.74486	0.874775	0.0629894	4.50892	1.18989	0.283834	19.0739	5.36171
mm|chr13:114110294-114110353			A_30_P01028764	chr13:114106455-114118105_F	lincRNA:chr13:114106455-114118105 forward strand	chr13:114106455-114118105_F	0.0750752	7.9584	1	0.116172	14.412	1.54741	0.0782792	5.6034	1.04268	0.402265	27.0326	5.35816
mm|chr8:13837735-13837676	ref|NM_153093|ens|ENSMUST00000071308|gb|BC152822|gb|AF366264		A_66_P109371	NM_153093	ref|Mus musculus cDNA sequence AF366264 (AF366264), mRNA [NM_153093]	AF366264	0.057501	6.09543	1	0.049352	6.12247	0.858281	0.159208	11.3965	2.76879	0.307945	20.6943	5.35548
mm|chr3:64307850-64307791	ref|NM_001104618|ref|NR_003962|ens|ENSMUST00000049571|ens|ENSMUST00000170270		A_55_P2173350	NM_001104618	ref|Mus musculus vomeronasal 2, receptor 5 (Vmn2r5), mRNA [NM_001104618]	Vmn2r5	0.0422583	4.47962	1	0.0368924	4.57676	0.873021	0.0525132	3.75901	1.24267	0.226306	15.208	5.35531
mm|chr2:27119268-27119209	ref|NM_009500|gb|U37017|tc|TC1587139|nap|NAP008729-001		A_55_P2034979	NM_009500	ref|Mus musculus vav 2 oncogene (Vav2), mRNA [NM_009500]	Vav2	0.0454957	4.8228	1	0.111487	13.8308	2.45051	0.11174	7.99863	2.45607	0.243519	16.3648	5.35259
mm|chr17:10522113-10522172			A_30_P01024696	chr17:10517466-10522172_F	lincRNA:chr17:10517466-10522172 forward strand	chr17:10517466-10522172_F	0.0444493	4.71188	1	0.0385455	4.78185	0.867179	0.0546748	3.91375	1.23005	0.23771	15.9744	5.3479
mm|chr15:78985577-78985518	ref|NM_011437|ens|ENSMUST00000089349|ens|ENSMUST00000040019|gb|AK043220		A_55_P2094729	NM_011437	ref|Mus musculus SRY-box containing gene 10 (Sox10), mRNA [NM_011437]	Sox10	0.137197	14.5437	1	0.268393	33.2962	1.95626	0.445527	31.8918	3.24736	0.733714	49.3064	5.34789
mm|chr16:13514885-13514826			A_30_P01032220	chr16:13514223-13516070_R	lincRNA:chr16:13514223-13516070 reverse strand	chr16:13514223-13516070_R	0.042279	4.48181	1	0.0797624	9.89511	1.88657	0.142939	10.2319	3.38086	0.225995	15.1871	5.34532
mm|chr3:092770730-092770789			A_55_P2166326	A_55_P2166326	Unknown	A_55_P2166326	0.0461696	4.89425	1	0.088494	10.9783	1.91671	0.0580845	4.15782	1.25807	0.246316	16.5527	5.33503
mm|chr4:115242872-115242931	ref|NM_001252539|ref|NM_201640|ref|NM_010011|ens|ENSMUST00000126645		A_55_P2024033	NM_001252539	ref|Mus musculus cytochrome P450, family 4, subfamily a, polypeptide 31 (Cyp4a31), transcript variant 2, mRNA [NM_001252539]	Cyp4a31	0.0471283	4.99587	1	0.0403973	5.01157	0.857176	0.057359	4.10589	1.21708	0.251279	16.8862	5.33182
mm|chr17:40980680-40980621	gb|AI661323		A_55_P2261188	AI661323	gb|va16a12.x1 Soares mouse lymph node NbMLN Mus musculus cDNA clone IMAGE:723070 3'. [AI661323]	AI661323	0.0683081	7.24105	1	0.0415697	5.15703	0.608562	0.0596878	4.27259	0.873803	0.364027	24.463	5.32919
mm|chr1:175814438-175814379			A_55_P2177073	A_55_P2177073	Unknown	A_55_P2177073	0.0692851	7.34462	1	0.313197	38.8543	4.5204	0.480172	34.3718	6.93037	0.369199	24.8106	5.32869
mm|chr9:110426274-110426333	ref|NM_001163569|gb|AK006864|gb|AK029506|gb|AK077169		A_55_P2035524	NM_001163569	ref|Mus musculus kinesin family member 9 (Kif9), transcript variant 1, mRNA [NM_001163569]	Kif9	0.0466739	4.9477	1	0.10215	12.6725	2.18859	0.133584	9.56228	2.86208	0.248646	16.7093	5.32731
mm|chr5:125192025-125191806			A_30_P01029949	chr5:125190100-125209625_R	lincRNA:chr5:125190100-125209625 reverse strand	chr5:125190100-125209625_R	0.050839	5.38923	1	0.0459315	5.69814	0.90347	0.135124	9.67251	2.65789	0.270733	18.1936	5.3253
mm|chr16:23613668-23613727	ref|NM_023386|ens|ENSMUST00000038423|gb|AK007477|gb|AJ251364		A_51_P304170	NM_023386	ref|Mus musculus receptor transporter protein 4 (Rtp4), mRNA [NM_023386]	Rtp4	0.717926	76.1043	1	0.831941	103.208	1.15881	6.7051	479.966	9.33954	3.8214	256.803	5.32283
mm|chr11:69712750-69712585	ref|NM_027419|ens|ENSMUST00000142121|ens|ENSMUST00000170595|ens|ENSMUST00000168077		A_66_P130612	NM_027419	ref|Mus musculus RIKEN cDNA 2810408A11 gene (2810408A11Rik), mRNA [NM_027419]	2810408A11Rik	0.0486906	5.16148	1	0.0462003	5.73149	0.948856	0.0611234	4.37535	1.25534	0.259145	17.4149	5.32229
mm|chr19:59508925-59508866			A_30_P01022747	chr19:59498190-59531390_R	lincRNA:chr19:59498190-59531390 reverse strand	chr19:59498190-59531390_R	0.0686264	7.2748	1	0.100595	12.4795	1.46583	0.294456	21.0778	4.29071	0.365178	24.5404	5.32125
mm|chr11:99970705-99970646			A_30_P01026591	chr11:99970341-99973420_R	lincRNA:chr11:99970341-99973420 reverse strand	chr11:99970341-99973420_R	0.0552683	5.85876	1	0.0556979	6.90973	1.00777	0.190717	13.652	3.45075	0.294086	19.7629	5.32105
mm|chr2:84363441-84363382			A_30_P01027996	chr2:84344350-84370075_R	lincRNA:chr2:84344350-84370075 reverse strand	chr2:84344350-84370075_R	0.0678477	7.19225	1	0.124459	15.44	1.83438	0.250755	17.9496	3.69585	0.361008	24.2602	5.32086
mm|chr19:9158256-9158197	ref|NM_011681|ens|ENSMUST00000025554|gb|X67702|gb|AK145844		A_51_P128575	NM_011681	ref|Mus musculus secretoglobin, family 1A, member 1 (uteroglobin) (Scgb1a1), mRNA [NM_011681]	Scgb1a1	0.125154	13.2671	1	0.159978	19.8464	1.27824	0.246683	17.6581	1.97103	0.665787	44.7416	5.31972
mm|chr19:4751867-4751926	ref|NM_021287|ens|ENSMUST00000008991|gb|AK172931|gb|AK147671		A_51_P403799	NM_021287	ref|Mus musculus spectrin beta 3 (Spnb3), mRNA [NM_021287]	Spnb3	0.0458344	4.85871	1	0.0399082	4.9509	0.870704	0.0570691	4.08513	1.24511	0.243563	16.3677	5.31398
mm|chr7:99889824-99889883			A_30_P01025448	chr7:99879368-99889978_F	lincRNA:chr7:99879368-99889978 forward strand	chr7:99879368-99889978_F	0.0499726	5.29738	1	0.152989	18.9795	3.06147	0.228445	16.3526	4.57141	0.264607	17.7819	5.29504
mm|chr15:58494324-58494383	ens|ENSMUST00000159177|ref|XM_905719|ref|XM_977315|ens|ENSMUST00000161028		A_55_P1960659	ENSMUST00000159177	ens|fer-1-like 6 (C. elegans) [Source:MGI Symbol;Acc:MGI:3645398] [ENSMUST00000159177]	Fer1l6	0.0587275	6.22545	1	0.0752906	9.34035	1.28203	0.0691427	4.94939	1.17735	0.310955	20.8966	5.29489
mm|chr2:85848808-85848867	ref|NM_146579|ens|ENSMUST00000062166|gb|BC113200|nap|NAP100466-001		A_55_P2071117	NM_146579	ref|Mus musculus olfactory receptor 1032 (Olfr1032), mRNA [NM_146579]	Olfr1032	0.0499916	5.29939	1	0.044546	5.52626	0.89107	0.0619779	4.43652	1.23977	0.26469	17.7875	5.29469
mm|chr13:97700393-97700452			A_30_P01018467	chr13:97700327-97700876_F	lincRNA:chr13:97700327-97700876 forward strand	chr13:97700327-97700876_F	0.047784	5.06537	1	0.0411044	5.0993	0.860213	0.224538	16.0729	4.69903	0.252374	16.9598	5.28156
mm|chr5:135815416-135815357	ref|NM_033571|ens|ENSMUST00000111181|ens|ENSMUST00000111182|ens|ENSMUST00000044972		A_55_P1952385	NM_033571	ref|Mus musculus FK506 binding protein 6 (Fkbp6), mRNA [NM_033571]	Fkbp6	0.0416198	4.41194	1	0.036159	4.48579	0.868793	0.0514923	3.68594	1.23721	0.219613	14.7582	5.27664
mm|chr2:5150942-5151001	ref|NM_028804|ens|ENSMUST00000027988|gb|AK172247|gb|AK009833		A_51_P277431	NM_028804	ref|Mus musculus coiled-coil domain containing 3 (Ccdc3), mRNA [NM_028804]	Ccdc3	0.0545328	5.78079	1	0.222605	27.6158	4.08205	0.327692	23.457	6.00909	0.287355	19.3106	5.26939
mm|chr14:66980426-66980485	ref|NM_019675|ens|ENSMUST00000074523|gb|AF105222|gb|BC014707		A_55_P2045642	NM_019675	ref|Mus musculus stathmin-like 4 (Stmn4), mRNA [NM_019675]	Stmn4	0.0457481	4.84956	1	0.157265	19.5099	3.43763	0.102514	7.33816	2.24083	0.241039	16.1981	5.26883
mm|chr15:59976661-59976602	gb|AK041614|tc|TC1641652|tc|TC1610638|riken|A630024N11		A_66_P103231	AK041614	gb|Mus musculus 3 days neonate thymus cDNA, RIKEN full-length enriched library, clone:A630024N11 product:unclassifiable, full insert sequence. [AK041614]	AK041614	0.0486682	5.15911	1	0.12923	16.032	2.65533	0.0514472	3.68271	1.0571	0.256313	17.2245	5.26654
mm|chr12:110750217-110750276			A_30_P01023556	chr12:110738120-110769295_F	lincRNA:chr12:110738120-110769295 forward strand	chr12:110738120-110769295_F	0.0415298	4.40239	1	0.0361759	4.48788	0.871083	0.05151	3.6872	1.24032	0.218615	14.6912	5.26406
mm|chr2:119074872-119074931	ref|NM_016907|ens|ENSMUST00000028783|ens|ENSMUST00000110816|ens|ENSMUST00000110817		A_55_P2055324	NM_016907	ref|Mus musculus serine protease inhibitor, Kunitz type 1 (Spint1), mRNA [NM_016907]	Spint1	0.0473495	5.01932	1	0.112568	13.9649	2.37739	0.0751635	5.38037	1.58742	0.249057	16.7369	5.25997
mm|chr12:015588488-015588547			A_55_P2149641	A_55_P2149641	Unknown	A_55_P2149641	0.0431479	4.57393	1	0.0406409	5.0418	0.941898	0.0534125	3.82339	1.23789	0.22686	15.2452	5.25772
mm|chr7:96657714-96657655	ref|NM_029614|ens|ENSMUST00000041761|gb|AK033671|gb|AK078518		A_52_P679105	NM_029614	ref|Mus musculus protease, serine, 23 (Prss23), mRNA [NM_029614]	Prss23	14.046	1488.96	1	64.3657	7985.04	4.58249	73.2679	5244.68	5.21628	73.7544	4956.38	5.25092
mm|chr16:85456636-85456577	ref|NM_144853|gb|BC099957|tc|TC1587556		A_55_P2129000	NM_144853	ref|Mus musculus cysteine and tyrosine-rich protein 1 (Cyyr1), mRNA [NM_144853]	Cyyr1	0.0472238	5.006	1	0.0413766	5.13306	0.87618	0.207483	14.8521	4.39362	0.247823	16.654	5.24783
mm|chr2:154245582-154245523			A_30_P01029034	chr2:154244616-154245900_R	lincRNA:chr2:154244616-154245900 reverse strand	chr2:154244616-154245900_R	0.0507077	5.3753	1	0.0454423	5.63745	0.896162	0.0632884	4.53033	1.2481	0.265933	17.871	5.24443
mm|chr1:190038192-190038251	ref|NM_001243792|ref|NM_011935|ens|ENSMUST00000110939|ens|ENSMUST00000027906		A_55_P2006499	NM_001243792	ref|Mus musculus estrogen-related receptor gamma (Esrrg), transcript variant 2, mRNA [NM_001243792]	Esrrg	0.0412838	4.37632	1	0.0356464	4.42219	0.863447	1.73078	123.893	41.9239	0.216494	14.5486	5.24403
mm|chr1:190788806-190788865	ref|NM_021408|ens|ENSMUST00000027905|ens|ENSMUST00000060479|tc|TC1698426		A_55_P2026567	NM_021408	ref|Mus musculus Usher syndrome 2A (autosomal recessive, mild) homolog (human) (Ush2a), mRNA [NM_021408]	Ush2a	0.0506213	5.36615	1	0.0440511	5.46486	0.870209	0.0787363	5.63612	1.5554	0.265424	17.8368	5.24333
mm|chr2:153155905-153155964	ref|NM_008444|ens|ENSMUST00000099189|ens|ENSMUST00000028977|gb|BC139388		A_55_P1990450	NM_008444	ref|Mus musculus kinesin family member 3B (Kif3b), mRNA [NM_008444]	Kif3b	0.0468358	4.96486	1	0.0913882	11.3374	1.95125	0.759008	54.3315	16.2057	0.245519	16.4991	5.24212
mm|chr12:3235525-3235584	gb|AK171768|gb|BC099424|riken|F830009N17		A_55_P2095354	AK171768	gb|Mus musculus activated spleen cDNA, RIKEN full-length enriched library, clone:F830009N17 product:hypothetical protein, full insert sequence. [AK171768]	1700012B15Rik	0.0686885	7.28137	1	0.137492	17.0568	2.00167	0.243808	17.4523	3.54948	0.359536	24.1612	5.2343
mm|chr12:74141325-74141384			A_30_P01033519	chr12:74135916-74142780_F	lincRNA:chr12:74135916-74142780 forward strand	chr12:74135916-74142780_F	0.0554212	5.87496	1	0.110361	13.6911	1.99132	0.196536	14.0685	3.54622	0.289976	19.4867	5.23223
mm|chr6:124480834-124480775	ref|NM_144938|ref|NM_001097617|ens|ENSMUST00000077416|ens|ENSMUST00000100963		A_55_P2042612	NM_144938	ref|Mus musculus complement component 1, s subcomponent (C1s), transcript variant 1, mRNA [NM_144938]	C1s	1.56421	165.815	1	1.69136	209.825	1.08129	5.30209	379.536	3.38964	8.16384	548.619	5.21916
mm|chr4:11053672-11053613			A_30_P01032559	chr4:11049325-11072075_R	lincRNA:chr4:11049325-11072075 reverse strand	chr4:11049325-11072075_R	0.0551872	5.85016	1	0.0536842	6.65991	0.972764	0.0688896	4.93127	1.24829	0.287976	19.3523	5.21817
mm|chr6:121053458-121053399			A_30_P01031721	chr6:121053274-121053553_R	lincRNA:chr6:121053274-121053553 reverse strand	chr6:121053274-121053553_R	0.0513299	5.44127	1	0.0393009	4.87556	0.765652	0.207981	14.8877	4.05184	0.267808	17.997	5.21738
mm|chr3:52580500-52580559	ref|NR_038079|gb|AK040707|riken|A530017F20|nap|NAP081102-1		A_55_P2353743	NR_038079	ref|Mus musculus predicted gene 2447 (Gm2447), non-coding RNA [NR_038079]	Gm2447	0.0596539	6.32366	1	0.0410704	5.09509	0.688478	0.105075	7.52153	1.76142	0.310938	20.8953	5.21236
mm|chr6:131558370-131558311	ens|ENSMUST00000082150|tc|NP589866|nap|NAP000004-006		A_66_P136582	ENSMUST00000082150	ens|high mobility group box 1-like [Source:MGI Symbol;Acc:MGI:3054046] [ENSMUST00000082150]	ENSMUST00000082150	0.0559274	5.92862	1	0.0565784	7.01896	1.01164	0.0653433	4.67742	1.16836	0.291076	19.5606	5.20454
mm|chrX:113794794-113794853	ref|XM_888672|ref|XM_910275		A_55_P2101562	XM_888672	ref|PREDICTED: Mus musculus H2A histone family, member B2, pseudogene (H2afb2-ps), mRNA [XM_888672]	H2afb2-ps	0.0653859	6.93127	1	0.0962743	11.9435	1.4724	0.266635	19.0863	4.07787	0.339689	22.8275	5.19515
mm|chr5:137735513-137735572	ref|NM_009599|ens|ENSMUST00000024099|ens|ENSMUST00000085934|gb|AK046080		A_55_P2109327	NM_009599	ref|Mus musculus acetylcholinesterase (Ache), mRNA [NM_009599]	Ache	0.042293	4.4833	1	0.0371435	4.60792	0.878243	0.0523307	3.74595	1.23734	0.219619	14.7586	5.19279
mm|chr8:106622404-106622345			A_30_P01022949	chr8:106619342-106624851_R	lincRNA:chr8:106619342-106624851 reverse strand	chr8:106619342-106624851_R	0.122712	13.0081	1	0.0409163	5.07597	0.333434	0.133467	9.55387	1.08765	0.636251	42.7568	5.18492
mm|chr9:37727106-37727165	ref|NM_146798|ens|ENSMUST00000086061|gb|BC119221|gb|BC119219		A_51_P314991	NM_146798	ref|Mus musculus olfactory receptor 878 (Olfr878), mRNA [NM_146798]	Olfr878	0.0645026	6.83765	1	0.0492248	6.10669	0.763144	0.0686949	4.91733	1.06499	0.334407	22.4725	5.1844
mm|chr6:91133182-91133123			A_30_P01020021	chr6:91133122-91133347_R	lincRNA:chr6:91133122-91133347 reverse strand	chr6:91133122-91133347_R	0.0513738	5.44591	1	0.0534726	6.63366	1.04085	0.0684094	4.8969	1.3316	0.266325	17.8973	5.18406
mm|chr9:13411232-13411291			A_30_P01019942	chr9:13224147-13424397_F	lincRNA:chr9:13224147-13424397 forward strand	chr9:13224147-13424397_F	0.0569796	6.04016	1	0.0443152	5.49763	0.777739	0.0664173	4.7543	1.16563	0.295227	19.8396	5.18128
mm|chr9:107886328-107886387	ref|NM_023738|ens|ENSMUST00000035216|gb|AK170644|gb|AK172467		A_55_P2026233	NM_023738	ref|Mus musculus ubiquitin-like modifier activating enzyme 7 (Uba7), mRNA [NM_023738]	Uba7	0.181152	19.2031	1	0.98179	121.798	5.41971	1.06361	76.1356	5.87138	0.938104	63.0416	5.17856
mm|chr17:15171687-15171628	gb|U49252|tc|NP1217618		A_55_P2048483	U49252	gb|Mus musculus D17Mia10e clone c7 mRNA, partial sequence. [U49252]	D17Zt10e	0.0396498	4.2031	1	0.0690683	8.56842	1.74196	0.0481524	3.44686	1.21444	0.204549	13.7459	5.15891
mm|chr15:64530998-64530939	ref|NM_009623|ens|ENSMUST00000023007|ens|ENSMUST00000170178|gb|BC156810		A_51_P303061	NM_009623	ref|Mus musculus adenylate cyclase 8 (Adcy8), mRNA [NM_009623]	Adcy8	0.0459797	4.87411	1	0.0412215	5.11383	0.896516	0.0538471	3.8545	1.17111	0.236907	15.9204	5.15244
mm|chr9:62719231-62723312	ref|NM_138304|ref|NM_001102468|ens|ENSMUST00000034777|ens|ENSMUST00000163820		A_52_P367760	NM_138304	ref|Mus musculus calmodulin-like 4 (Calml4), transcript variant 1, mRNA [NM_138304]	Calml4	0.282589	29.956	1	0.284149	35.2507	1.00552	1.04479	74.7887	3.69722	1.45508	97.7833	5.14913
unmapped			A_30_P01020522	chr14:65720392-65769859_R	lincRNA:chr14:65720392-65769859 reverse strand	chr14:65720392-65769859_R	0.0466049	4.94039	1	0.118438	14.693	2.54131	0.0575942	4.12272	1.2358	0.239951	16.125	5.14863
mm|chr7:148451014-148450664	ref|NM_016850|ref|NM_001252601|ref|NM_001252600|ens|ENSMUST00000127223		A_51_P421876	NM_016850	ref|Mus musculus interferon regulatory factor 7 (Irf7), transcript variant 1, mRNA [NM_016850]	Irf7	0.0828472	8.78228	1	0.0768786	9.53735	0.927956	0.544984	39.0112	6.57818	0.426322	28.6493	5.14588
mm|chr5:31883801-31883742			A_30_P01017553	chr5:31856417-31916414_R	lincRNA:chr5:31856417-31916414 reverse strand	chr5:31856417-31916414_R	0.194478	20.6157	1	0.1032	12.8027	0.530653	1.31171	93.8949	6.74476	0.999211	67.1481	5.13792
mm|chr12:86817900-86817959	ref|NM_010234|ens|ENSMUST00000021674|gb|AK159667|gb|AK159688		A_52_P262219	NM_010234	ref|Mus musculus FBJ osteosarcoma oncogene (Fos), mRNA [NM_010234]	Fos	0.666548	70.6579	1	2.63651	327.078	3.95546	4.45925	319.203	6.69006	3.42394	230.092	5.13682
unmapped	gb|BU938417		A_55_P2267240	BU938417	gb|AGENCOURT_10518739 NIH_MGC_169 Mus musculus cDNA clone IMAGE:6706548 5', mRNA sequence [BU938417]	4930471G03Rik	0.0489315	5.18701	1	0.0532295	6.60351	1.08784	0.0608626	4.35668	1.24383	0.251145	16.8772	5.13259
mm|chr12:86817900-86817959	ref|NM_010234|ens|ENSMUST00000021674|gb|AK159667|gb|AK159688		A_52_P262219	NM_010234	ref|Mus musculus FBJ osteosarcoma oncogene (Fos), mRNA [NM_010234]	Fos	0.727338	77.102	1	2.56634	318.373	3.5284	4.62038	330.737	6.35246	3.73073	250.709	5.1293
mm|chr4:129297779-129297720	ens|ENSMUST00000126777|gb|AK003287|ens|ENSMUST00000106035|tc|TC1595660		A_55_P2160081	ENSMUST00000126777	ens|coiled coil domain containing 28B [Source:MGI Symbol;Acc:MGI:1913514] [ENSMUST00000126777]	Ccdc28b	0.110083	11.6695	1	0.256746	31.8512	2.33228	0.476489	34.1082	4.32844	0.564306	37.922	5.12617
mm|chr15:88613359-88613418	ref|NM_181412|ref|NR_033593|ens|ENSMUST00000041297|ref|XM_001480180		A_66_P127464	NM_181412	ref|Mus musculus zinc finger, BED domain containing 4 (Zbed4), mRNA [NM_181412]	Zbed4	0.0460448	4.88101	1	0.0531101	6.5887	1.15344	0.0567949	4.06551	1.23347	0.235914	15.8537	5.12357
unmapped	gb|BG295362		A_55_P2374618	BG295362	gb|602392661F1 NIH_MGC_94 Mus musculus cDNA clone IMAGE:4504431 5', mRNA sequence [BG295362]	D9Ertd788e	0.071133	7.5405	1	0.0382039	4.73947	0.537077	0.0747827	5.35311	1.05131	0.364088	24.4671	5.11841
mm|chr9:105676655-105676597	ref|NM_172927|ens|ENSMUST00000060896|gb|AM748260|gb|AK087828		A_51_P105847	NM_172927	ref|Mus musculus collagen, type VI, alpha 6 (Col6a6), transcript variant 2, mRNA [NM_172927]	Col6a6	0.0497464	5.2734	1	0.0436271	5.41226	0.87699	0.0634637	4.54287	1.27574	0.254507	17.1032	5.1161
mm|chr7:104059544-104059603	ens|ENSMUST00000107162|ens|ENSMUST00000107165|ens|ENSMUST00000107166|nap|NAP039851-1		A_55_P2141088	ENSMUST00000107162	ens|odd Oz/ten-m homolog 4 (Drosophila) [Source:MGI Symbol;Acc:MGI:2447063] [ENSMUST00000107162]	Odz4	0.0486603	5.15827	1	0.0423369	5.2522	0.870049	0.0860008	6.15613	1.76737	0.248933	16.7286	5.11574
mm|chr12:113920572-113920631	ref|NM_001100460|ens|ENSMUST00000169593|gb|BC051084|gb|AK079245		A_52_P100381	NM_001100460	ref|Mus musculus zinc finger and BTB domain containing 42 (Zbtb42), mRNA [NM_001100460]	Zbtb42	0.0460581	4.88242	1	0.0414496	5.14213	0.899943	0.135064	9.66816	2.93247	0.23539	15.8184	5.11071
mm|chr8:19228090-19228149	ref|NM_054074|ens|ENSMUST00000063112|gb|BC119422|gb|BC141871		A_51_P415546	NM_054074	ref|Mus musculus defensin beta 6 (Defb6), mRNA [NM_054074]	Defb6	0.0533849	5.6591	1	0.037909	4.70289	0.710108	0.0618625	4.42826	1.1588	0.272012	18.2795	5.0953
mm|chr15:74875554-74875495	ref|NM_001252055|ref|NM_010741|ens|ENSMUST00000065408|gb|AK088782		A_55_P2064771	NM_001252055	ref|Mus musculus lymphocyte antigen 6 complex, locus C1 (Ly6c1), transcript variant 2, mRNA [NM_001252055]	Ly6c1	207.904	22039	1	533.213	66149	2.56471	1053.45	75408.4	5.06702	1058.95	71162.3	5.09344
mm|chr1:75363404-75363629	ref|NM_010043|gb|L22550|gb|AK131922|gb|BC031760		A_51_P335969	NM_010043	ref|Mus musculus desmin (Des), mRNA [NM_010043]	Des	0.0471823	5.00159	1	0.0406621	5.04443	0.861808	0.0750818	5.37453	1.59131	0.240169	16.1396	5.09023
mm|chr7:104453474-104453533	ref|NM_010248|ref|NM_001162477|ens|ENSMUST00000004622|gb|AF104244		A_55_P2071078	NM_010248	ref|Mus musculus growth factor receptor bound protein 2-associated protein 2 (Gab2), transcript variant 1, mRNA [NM_010248]	Gab2	0.123022	13.041	1	0.0646019	8.01434	0.525125	0.660153	47.2552	5.36614	0.626182	42.0801	5.09
mm|chr4:91296771-91296830	ens|ENSMUST00000134966|gb|BG080251|nap|NAP047975-1		A_55_P2404867	ENSMUST00000134966	ens|predicted gene 12668 [Source:MGI Symbol;Acc:MGI:3651936] [ENSMUST00000134966]	ENSMUST00000134966	0.0499798	5.29815	1	0.0435615	5.40412	0.871582	0.0602836	4.31523	1.20616	0.25437	17.0939	5.08945
mm|chr6:40718909-40718968			A_30_P01018926	chr6:40693617-40720167_F	lincRNA:chr6:40693617-40720167 forward strand	chr6:40693617-40720167_F	0.136211	14.4391	1	0.265807	32.9753	1.95143	0.447766	32.0521	3.2873	0.693132	46.5792	5.08866
mm|chr7:147232915-147232855	gb|U62523|tc|TC1590990|nap|NAP109267-1		A_55_P2002291	U62523	gb|Mus musculus Msx3 mRNA, complete cds. [U62523]	Msx3	0.0722215	7.65589	1	0.102553	12.7225	1.41998	0.378941	27.1255	5.24693	0.367349	24.6862	5.08642
mm|chr17:26911743-26911802			A_30_P01030991	chr17:26911032-26912366_F	lincRNA:chr17:26911032-26912366 forward strand	chr17:26911032-26912366_F	0.319751	33.8955	1	0.765682	94.9885	2.39462	1.24812	89.3431	3.9034	1.62593	109.264	5.08498
mm|chr6:69218041-69217982	ens|ENSMUST00000103348|ens|ENSMUST00000103354|gb|M83037|gb|X75400		A_66_P140474	ENSMUST00000103348	ens|immunoglobulin kappa chain variable 4-70 [Source:MGI Symbol;Acc:MGI:2686348] [ENSMUST00000103348]	ENSMUST00000103348	0.150391	15.9423	1	0.139739	17.3356	0.929167	1.79712	128.642	11.9496	0.764121	51.3498	5.08088
mm|chr17:34330854-34330913	ref|NM_013683|ref|NM_001161730|ens|ENSMUST00000166582|ens|ENSMUST00000041633		A_51_P100327	NM_013683	ref|Mus musculus transporter 1, ATP-binding cassette, sub-family B (MDR/TAP) (Tap1), transcript variant 1, mRNA [NM_013683]	Tap1	0.0559455	5.93055	1	0.29124	36.1304	5.20578	0.178139	12.7516	3.18415	0.284084	19.0907	5.07786
mm|chr6:90759878-90759937			A_30_P01031354	chr6:90745692-90777977_F	lincRNA:chr6:90745692-90777977 forward strand	chr6:90745692-90777977_F	0.0491737	5.2127	1	0.0431337	5.35104	0.877169	0.0619505	4.43455	1.25983	0.249683	16.779	5.07757
mm|chr15:75931995-75931936	ref|NM_144848|gb|AK041683|gb|AY312170|gb|BC026387		A_55_P2110351	NM_144848	ref|Mus musculus epiplakin 1 (Eppk1), mRNA [NM_144848]	Eppk1	0.0395551	4.19307	1	0.178751	22.1753	4.51903	0.183939	13.1668	4.65021	0.2008	13.494	5.07647
mm|chr2:10019537-10018826	ref|NM_010582|ens|ENSMUST00000042290|ens|ENSMUST00000159437|gb|AK133782		A_51_P196726	NM_010582	ref|Mus musculus inter-alpha trypsin inhibitor, heavy chain 2 (Itih2), mRNA [NM_010582]	Itih2	1.40726	149.178	1	4.84318	600.832	3.44157	6.88127	492.577	4.88984	7.14342	480.046	5.07612
mm|chr9:75330934-75330993			A_30_P01022063	chr9:75330657-75332641_F	lincRNA:chr9:75330657-75332641 forward strand	chr9:75330657-75332641_F	0.0401892	4.26029	1	0.0349168	4.33168	0.868811	0.0494005	3.5362	1.2292	0.203924	13.7039	5.07411
mm|chr18:009593135-009593076			A_55_P2172693	A_55_P2172693	Unknown	A_55_P2172693	0.0451325	4.7843	1	0.0450638	5.59049	0.998479	0.05551	3.97353	1.22993	0.228887	15.3815	5.07145
mm|chr10:105992383-105992324	gb|AK015944|tc|NP742032|riken|4930532I03|nap|NAP074543-1		A_55_P2343929	AK015944	gb|Mus musculus adult male testis cDNA, RIKEN full-length enriched library, clone:4930532I03 product:unclassifiable, full insert sequence. [AK015944]	4930532I03Rik	0.0476273	5.04877	1	0.0413544	5.13032	0.868292	0.381513	27.3095	8.01038	0.241458	16.2262	5.06973
mm|chr7:52900705-52900764	ref|NM_172418|ens|ENSMUST00000153706|ens|ENSMUST00000098455|ens|ENSMUST00000150045		A_51_P122141	NM_172418	ref|Mus musculus MEF2 activating motif and SAP domain containing transcriptional regulator (Mamstr), mRNA [NM_172418]	Mamstr	0.0887355	9.40647	1	0.157019	19.4793	1.76951	0.482082	34.5085	5.43279	0.449847	30.2302	5.06952
mm|chr2:179911138-179911079	ref|NM_001081171|ens|ENSMUST00000087542|ens|ENSMUST00000015791|gb|AK129157		A_55_P2064321	NM_001081171	ref|Mus musculus laminin, alpha 5 (Lama5), mRNA [NM_001081171]	Lama5	1.29033	136.782	1	1.76513	218.978	1.36797	5.97725	427.865	4.63236	6.53669	439.273	5.06592
mm|chr10:85392047-85392106	ref|NM_001163614|ens|ENSMUST00000170396		A_55_P1993148	NM_001163614	ref|Mus musculus achaete-scute complex homolog 4 (Drosophila) (Ascl4), mRNA [NM_001163614]	Ascl4	0.0448381	4.7531	1	0.0398105	4.93877	0.887871	0.0552083	3.95194	1.23128	0.226958	15.2518	5.06172
mm|chr3:51890916-51890857			A_30_P01029060	chr3:51890691-51891781_R	lincRNA:chr3:51890691-51891781 reverse strand	chr3:51890691-51891781_R	0.042703	4.52676	1	0.150831	18.7116	3.53209	0.139798	10.0071	3.27374	0.215896	14.5085	5.05576
mm|chr19:44222665-44222606	ref|NM_181422|ens|ENSMUST00000161357|ens|ENSMUST00000042026|gb|AK046772		A_52_P193611	NM_181422	ref|Mus musculus polycystic kidney disease 2-like 1 (Pkd2l1), mRNA [NM_181422]	Pkd2l1	0.0485942	5.15127	1	0.0424522	5.26651	0.873606	0.0774029	5.54067	1.59284	0.245591	16.504	5.05392
mm|chr7:26056748-26056689			A_30_P01018985	chr7:26054813-26063725_R	lincRNA:chr7:26054813-26063725 reverse strand	chr7:26054813-26063725_R	0.0406152	4.30544	1	0.0405613	5.03193	0.998674	0.0528284	3.78158	1.30071	0.205233	13.7919	5.0531
mm|chr9:107897146-107897205	gb|AK043882|tc|TC1592452|riken|A830045J20|nap|NAP082662-1		A_52_P120122	AK043882	gb|Mus musculus 10 days neonate cortex cDNA, RIKEN full-length enriched library, clone:A830045J20 product:hypothetical protein, full insert sequence. [AK043882]	AK043882	0.0452643	4.79828	1	0.0396583	4.91991	0.87615	0.055013	3.93795	1.21537	0.228602	15.3623	5.05039
mm|chr17:46994432-46994491			A_30_P01018545	chr17:46972160-46997919_F	lincRNA:chr17:46972160-46997919 forward strand	chr17:46972160-46997919_F	0.0639274	6.77667	1	0.0653921	8.11236	1.02291	0.199346	14.2696	3.11832	0.322702	21.6859	5.04794
mm|chr13:52071833-52071892			A_30_P01027449	chr13:52068582-52071952_F	lincRNA:chr13:52068582-52071952 forward strand	chr13:52068582-52071952_F	0.0509699	5.40311	1	0.117859	14.6213	2.31232	0.178948	12.8095	3.51086	0.257175	17.2825	5.04562
mm|chr6:146495324-146495265			A_30_P01023473	chr6:146495264-146495602_R	lincRNA:chr6:146495264-146495602 reverse strand	chr6:146495264-146495602_R	0.0420405	4.45653	1	0.0775583	9.62167	1.84485	0.0597929	4.28011	1.42227	0.212092	14.2529	5.04496
mm|chr17:26913509-26913568			A_30_P01027115	chr17:26911397-26917047_F	lincRNA:chr17:26911397-26917047 forward strand	chr17:26911397-26917047_F	0.527476	55.9155	1	1.37624	170.732	2.6091	1.93907	138.803	3.67612	2.66101	178.823	5.0448
mm|chr5:28181550-28181609	ref|NM_008314|ens|ENSMUST00000036227|gb|AK137323|riken|9630009M09		A_55_P2087345	NM_008314	ref|Mus musculus 5-hydroxytryptamine (serotonin) receptor 5A (Htr5a), mRNA [NM_008314]	Htr5a	0.0498319	5.28246	1	0.0431058	5.3476	0.865026	0.0630395	4.51251	1.26504	0.251264	16.8852	5.04223
mm|chr7:149112875-149112816			A_30_P01029830	chr7:149108190-149123890_R	lincRNA:chr7:149108190-149123890 reverse strand	chr7:149108190-149123890_R	0.0859429	9.11044	1	0.18241	22.6293	2.12246	0.305521	21.8699	3.55493	0.432819	29.0859	5.03612
mm|chr13:74712865-74712806			A_30_P01024708	chr13:74712805-74729233_R	lincRNA:chr13:74712805-74729233 reverse strand	chr13:74712805-74729233_R	0.0470125	4.9836	1	0.0403283	5.00303	0.857822	0.0553949	3.96529	1.1783	0.236741	15.9092	5.03569
mm|chr19:17296156-17296215	ref|NM_181348|ens|ENSMUST00000044176|ens|ENSMUST00000099594|ens|ENSMUST00000087689		A_51_P506054	NM_181348	ref|Mus musculus prune homolog 2 (Drosophila) (Prune2), mRNA [NM_181348]	Prune2	0.164521	17.4401	1	0.418781	51.9528	2.54546	0.558481	39.9773	3.39459	0.828223	55.6575	5.03415
mm|chr13:51781521-51781462	ens|ENSMUST00000110042|tc|TC1645272		A_55_P2049532	ENSMUST00000110042	ens|predicted gene 15440 [Source:MGI Symbol;Acc:MGI:3642353] [ENSMUST00000110042]	ENSMUST00000110042	0.0444013	4.70679	1	0.0383266	4.75469	0.863187	0.0908082	6.50026	2.04517	0.223282	15.0048	5.02873
mm|chr12:17076183-17076242	gb|DV657805|tc|TC1620346		A_55_P2176968	DV657805	gb|DS158B_D12 Eppig [DV657805]	DV657805	0.0499528	5.29529	1	0.0436159	5.41087	0.873142	0.0630473	4.51307	1.26214	0.250979	16.8661	5.02432
mm|chr4:44184057-44183998			A_30_P01028479	chr4:44181997-44249172_R	lincRNA:chr4:44181997-44249172 reverse strand	chr4:44181997-44249172_R	0.0486395	5.15606	1	0.0909297	11.2805	1.86946	0.089118	6.37927	1.83222	0.244257	16.4143	5.02178
mm|chr10:79343869-79344685	ref|NM_011178|ens|ENSMUST00000163188|ens|ENSMUST00000164134|ens|ENSMUST00000006679		A_51_P209818	NM_011178	ref|Mus musculus proteinase 3 (Prtn3), mRNA [NM_011178]	Prtn3	0.0463552	4.91392	1	0.0954402	11.84	2.05889	0.169161	12.1089	3.64923	0.232418	15.6187	5.01384
mm|chr7:147604845-147604786	ref|NM_147026|ens|ENSMUST00000073226|gb|BC140398|gb|BC148690		A_66_P132621	NM_147026	ref|Mus musculus olfactory receptor 532 (Olfr532), mRNA [NM_147026]	Olfr532	0.0468131	4.96246	1	0.0612822	7.60251	1.30908	0.0565127	4.04531	1.2072	0.234474	15.7569	5.00873
mm|chr2:122350869-122350928	ref|NM_001085518|ref|NM_172980|ens|ENSMUST00000110521|ens|ENSMUST00000153848		A_55_P2098971	NM_001085518	ref|Mus musculus predicted gene 14085 (Gm14085), mRNA [NM_001085518]	Gm14085	0.0441193	4.6769	1	0.0382691	4.74756	0.8674	0.0543007	3.88696	1.23077	0.220758	14.8352	5.00365
mm|chr16:10790881-10790822	ref|NM_013638|ens|ENSMUST00000050864|gb|AK132894|gb|BC090986		A_55_P2115435	NM_013638	ref|Mus musculus protamine 3 (Prm3), mRNA [NM_013638]	Prm3	0.0513525	5.44365	1	0.039774	4.93426	0.774531	0.0553448	3.9617	1.07774	0.256873	17.2622	5.00217
mm|chr7:51655255-51655314	ref|NM_016663|ref|NM_001114116|ens|ENSMUST00000118962|ens|ENSMUST00000118831		A_55_P1975973	NM_016663	ref|Mus musculus synaptotagmin III (Syt3), transcript variant 1, mRNA [NM_016663]	Syt3	0.0434884	4.61002	1	0.0375354	4.65653	0.863113	0.172525	12.3497	3.96714	0.217506	14.6167	5.00148
mm|chr1:115832703-115832762			A_30_P01027185	chr1:115829055-115854155_F	lincRNA:chr1:115829055-115854155 forward strand	chr1:115829055-115854155_F	0.0480585	5.09448	1	0.0418388	5.19041	0.870581	0.23746	16.9979	4.94105	0.240247	16.1449	4.99905
mm|chr19:21465882-21465823	ref|NM_010266|ens|ENSMUST00000087600|gb|BC076583|tc|TC1577122		A_55_P2097478	NM_010266	ref|Mus musculus guanine deaminase (Gda), mRNA [NM_010266]	Gda	9.91646	1051.2	1	11.0178	1366.83	1.11106	50.0225	3580.72	5.04439	49.547	3329.61	4.99644
mm|chr7:99985127-99985186	ref|NM_029494|ens|ENSMUST00000032879|gb|AK142206|gb|BC017550		A_51_P229990	NM_029494	ref|Mus musculus RAB30, member RAS oncogene family (Rab30), mRNA [NM_029494]	Rab30	0.0499436	5.29431	1	0.117207	14.5404	2.34679	0.154104	11.0311	3.08556	0.249414	16.7609	4.99392
mm|chr6:47414494-47414553	gb|AK020413|riken|9430013L14		A_55_P2255628	AK020413	gb|Mus musculus 12 days embryo embryonic body between diaphragm region and neck cDNA, RIKEN full-length enriched library, clone:9430013L14 product:unclassifiable, full insert sequence. [AK020413]	9430013L14Rik	0.0515631	5.46599	1	0.101137	12.5468	1.96142	0.184203	13.1856	3.57237	0.257388	17.2967	4.9917
mm|chrX:72456709-72455821	ref|NM_007977|ref|NM_001161374|ref|NM_001161373|ens|ENSMUST00000114085		A_51_P289239	NM_007977	ref|Mus musculus coagulation factor VIII (F8), transcript variant 1, mRNA [NM_007977]	F8	0.0451796	4.7893	1	0.13048	16.187	2.88803	0.141618	10.1373	3.13455	0.225323	15.142	4.98727
mm|chr11:118310045-118310104	ref|NM_001204129|ref|NM_019959|ref|NM_001204130|ens|ENSMUST00000106284		A_55_P2022678	NM_001204129	ref|Mus musculus C1q and tumor necrosis factor related protein 1 (C1qtnf1), transcript variant 1, mRNA [NM_001204129]	C1qtnf1	0.58724	62.2508	1	0.880666	109.253	1.49967	2.08493	149.244	3.55039	2.92734	196.72	4.98491
mm|chr1:148749342-148749401	ref|NM_153539|ref|NM_001145807|ens|ENSMUST00000074622|ens|ENSMUST00000128345		A_51_P453158	NM_153539	ref|Mus musculus family with sequence similarity 5, member C (Fam5c), transcript variant 1, mRNA [NM_153539]	Fam5c	0.766669	81.2712	1	1.37881	171.052	1.79845	3.48529	249.485	4.54602	3.81274	256.221	4.97313
mm|chr9:121579630-121579689	ref|NM_011703|ens|ENSMUST00000035115|gb|AK052465|tc|TC1587764		A_52_P227279	NM_011703	ref|Mus musculus vasoactive intestinal peptide receptor 1 (Vipr1), mRNA [NM_011703]	Vipr1	0.0471839	5.00177	1	0.135131	16.764	2.86392	0.353089	25.2749	7.48325	0.234612	15.7662	4.97229
mm|chr1:183158554-183158613	ens|ENSMUST00000066988|ref|XM_003084469|ref|XM_003086192|gb|AK040631		A_66_P134539	ENSMUST00000066988	ens|RIKEN cDNA A430110L20 gene [Source:MGI Symbol;Acc:MGI:3036249] [ENSMUST00000066988]	A430110L20Rik	0.0458382	4.85911	1	0.125859	15.6137	2.74572	0.145284	10.3998	3.16951	0.227802	15.3085	4.96969
mm|chr1:65325211-65325270	ref|NM_011086|gb|AK135573|tc|TC1665660|riken|7030407L03		A_55_P1990435	NM_011086	ref|Mus musculus phosphoinositide kinase, FYVE finger containing (Pikfyve), mRNA [NM_011086]	Pikfyve	0.0407481	4.31953	1	0.112105	13.9075	2.75117	0.0502275	3.5954	1.23263	0.20249	13.6076	4.96932
mm|chr5:33186707-33186766			A_30_P01029251	chr5:33174092-33200792_F	lincRNA:chr5:33174092-33200792 forward strand	chr5:33174092-33200792_F	0.113661	12.0487	1	0.151569	18.8032	1.33351	0.425853	30.4835	3.74669	0.564786	37.9542	4.96903
mm|chr4:138374987-138374928			A_55_P2026964	A_55_P2026964	Unknown	A_55_P2026964	0.0428253	4.53972	1	0.0709161	8.79766	1.65594	0.0527127	3.77329	1.23088	0.212709	14.2943	4.9669
mm|chr12:84370573-84370514	ref|NM_058212|gb|FJ151218|gb|AK012970|gb|BC048572		A_52_P684138	NM_058212	ref|Mus musculus D4, zinc and double PHD fingers, family 3 (Dpf3), mRNA [NM_058212]	Dpf3	0.0426845	4.5248	1	0.0376948	4.67631	0.883102	0.0579581	4.14877	1.35783	0.211998	14.2465	4.96664
mm|chr12:74142509-74142568			A_30_P01019178	chr12:74140325-74142695_F	lincRNA:chr12:74140325-74142695 forward strand	chr12:74140325-74142695_F	0.0472579	5.00961	1	0.0911948	11.3134	1.92973	0.0577296	4.13241	1.22159	0.234655	15.7691	4.96542
mm|chr7:30740757-30740816	ens|ENSMUST00000077142|gb|AK082547|gb|BB389380|tc|NP571435		A_55_P2013416	ENSMUST00000077142	ens|RIKEN cDNA C230062I16 gene [Source:MGI Symbol;Acc:MGI:2442417] [ENSMUST00000077142]	ENSMUST00000077142	0.0415586	4.40545	1	0.0358732	4.45033	0.863196	0.0495056	3.54372	1.19123	0.206271	13.8616	4.96337
mm|chr12:58687068-58687009	ens|ENSMUST00000143949|gb|AK019540|riken|4921518K17|nap|NAP073257-1		A_55_P2397854	ENSMUST00000143949	ens|RIKEN cDNA 4921518K17 gene [Source:MGI Symbol;Acc:MGI:1926008] [ENSMUST00000143949]	ENSMUST00000143949	0.0597672	6.33566	1	0.04869	6.04035	0.814662	0.0641319	4.59071	1.07303	0.296567	19.9296	4.96204
mm|chr5:73148662-73148603	ref|NM_001113460|ref|NM_001113461|ref|NM_001113464|ens|ENSMUST00000113594		A_55_P2047753	NM_001113460	ref|Mus musculus tec protein tyrosine kinase (Tec), transcript variant 1, mRNA [NM_001113460]	Tec	0.0644714	6.83434	1	0.144084	17.8747	2.23486	0.266222	19.0568	4.1293	0.319659	21.4814	4.95815
mm|chr17:26913379-26913438			A_30_P01023033	chr17:26911397-26917047_F	lincRNA:chr17:26911397-26917047 forward strand	chr17:26911397-26917047_F	0.442823	46.9417	1	0.906169	112.417	2.04635	1.68153	120.368	3.7973	2.1945	147.473	4.9557
mm|chr9:118314102-118314161			A_30_P01021929	chr9:118291593-118324230_F	lincRNA:chr9:118291593-118324230 forward strand	chr9:118291593-118324230_F	7.43503	788.156	1	10.7433	1332.78	1.44496	29.4345	2106.99	3.9589	36.8155	2474.05	4.95163
mm|chr8:125667010-125666951	ref|NM_020564|ens|ENSMUST00000122819|ens|ENSMUST00000000755|gb|AK142243		A_51_P471458	NM_020564	ref|Mus musculus sulfotransferase family 5A, member 1 (Sult5a1), mRNA [NM_020564]	Sult5a1	0.0890986	9.44497	1	0.243669	30.2289	2.73482	0.380465	27.2345	4.27015	0.440976	29.6341	4.9493
mm|chr2:48974310-48974369			A_30_P01024553	chr2:48805604-48974396_F	lincRNA:chr2:48805604-48974396 forward strand	chr2:48805604-48974396_F	0.0521704	5.53036	1	0.045513	5.64623	0.872392	0.0613406	4.3909	1.17577	0.25815	17.348	4.9482
mm|chr7:148545228-148545169	ref|NR_033532|gb|AK038776|gb|AK080797|tc|NP719858		A_55_P1954680	NR_033532	ref|Mus musculus RIKEN cDNA B230206H07 gene (B230206H07Rik), non-coding RNA [NR_033532]	B230206H07Rik	0.0450051	4.77079	1	0.0395575	4.9074	0.878956	0.0527375	3.77507	1.17181	0.22266	14.963	4.94744
mm|chr15:74962264-74962205	ref|XM_001477102|ref|XM_909906|gb|AK152247|gb|AK153212		A_55_P2045136	XM_001477102	ref|PREDICTED: Mus musculus RIKEN cDNA I830127L07 gene (I830127L07Rik), mRNA [XM_001477102]	I830127L07Rik	0.236715	25.0932	1	0.797312	98.9123	3.36823	0.952413	68.1759	4.02345	1.17062	78.6672	4.94528
mm|chr1:138529399-138529458			A_30_P01019369	chr1:138528250-138538250_F	lincRNA:chr1:138528250-138538250 forward strand	chr1:138528250-138538250_F	0.0810216	8.58875	1	0.0717906	8.90614	0.886067	0.0664761	4.75851	0.820473	0.400406	26.9077	4.94196
mm|chr16:63545214-63545155	ref|NM_010140|gb|AK045219|gb|AK132335|gb|AK044936		A_52_P276955	NM_010140	ref|Mus musculus Eph receptor A3 (Epha3), mRNA [NM_010140]	Epha3	0.0420974	4.46257	1	0.0520705	6.45972	1.2369	0.232754	16.6611	5.52894	0.207854	13.968	4.93745
mm|chr3:108743202-108743143	ens|ENSMUST00000050914|gb|AK005845|tc|TC1633277|riken|1700010M06		A_55_P2161490	ENSMUST00000050914	ens|predicted gene 9857 [Source:MGI Symbol;Acc:MGI:3704224] [ENSMUST00000050914]	ENSMUST00000050914	0.0768241	8.1438	1	0.204766	25.4027	2.66539	0.34002	24.3394	4.42595	0.378959	25.4665	4.93281
mm|chr6:5325865-5325806			A_30_P01025859	chr6:5311375-5328075_R	lincRNA:chr6:5311375-5328075 reverse strand	chr6:5311375-5328075_R	0.0538894	5.71258	1	0.0471072	5.84399	0.874147	0.0665104	4.76096	1.2342	0.265573	17.8468	4.92812
mm|chr2:128126804-128126863			A_30_P01031610	chr2:127988295-128194920_F	lincRNA:chr2:127988295-128194920 forward strand	chr2:127988295-128194920_F	0.0468729	4.96879	1	0.0394891	4.89891	0.842473	0.055008	3.9376	1.17356	0.230985	15.5224	4.9279
mm|chr13:014155940-014155999			A_55_P2157963	A_55_P2157963	Unknown	A_55_P2157963	0.0446638	4.73461	1	0.0396863	4.92337	0.888557	0.505436	36.1802	11.3165	0.219987	14.7833	4.9254
mm|chr17:84477810-84477869			A_30_P01032282	chr17:84470764-84486339_F	lincRNA:chr17:84470764-84486339 forward strand	chr17:84470764-84486339_F	0.0433999	4.60064	1	0.0790857	9.81116	1.82225	0.165653	11.8578	3.81689	0.213626	14.3559	4.92227
mm|chr8:131653716-131653657	ens|ENSMUST00000108743|gb|AK050942|tc|TC1595450|riken|D030041I21		A_55_P1988232	ENSMUST00000108743	ens|predicted gene 10999 [Source:MGI Symbol;Acc:MGI:3779215] [ENSMUST00000108743]	ENSMUST00000108743	0.0751405	7.96532	1	0.0446341	5.53718	0.594008	0.177958	12.7387	2.36834	0.36956	24.8349	4.91826
mm|chr7:54309883-54309942	ref|NM_026436|ens|ENSMUST00000010451|gb|AK075589|gb|AK007864		A_51_P314285	NM_026436	ref|Mus musculus transmembrane protein 86A (Tmem86a), mRNA [NM_026436]	Tmem86a	1.12988	119.774	1	1.59681	198.096	1.41325	5.95959	426.601	5.27452	5.55612	373.377	4.91743
mm|chr12:86817900-86817959	ref|NM_010234|ens|ENSMUST00000021674|gb|AK159667|gb|AK159688		A_52_P262219	NM_010234	ref|Mus musculus FBJ osteosarcoma oncogene (Fos), mRNA [NM_010234]	Fos	0.698892	74.0865	1	2.65802	329.747	3.80319	4.52719	324.067	6.47767	3.43581	230.891	4.91609
mm|chrX:53635137-53635196	gb|AK018320|tc|TC1596400|riken|6530403M18|nap|NAP015698-001		A_55_P1971264	AK018320	gb|Mus musculus 10 days neonate cerebellum cDNA, RIKEN full-length enriched library, clone:6530403M18 product:unclassifiable, full insert sequence. [AK018320]	6530403M18Rik	0.0538216	5.7054	1	0.0469111	5.81967	0.871604	0.0997659	7.14147	1.85364	0.26457	17.7794	4.91568
mm|chr14:62230643-62230702	ref|NM_001039105|ref|NM_206974|ens|ENSMUST00000051184|gb|AY491737		A_55_P1980821	NM_001039105	ref|Mus musculus potassium channel regulator (Kcnrg), transcript variant 1, mRNA [NM_001039105]	Kcnrg	0.0755912	8.0131	1	0.0387193	4.80342	0.51222	0.0548854	3.92882	0.726082	0.371575	24.9703	4.91559
mm|chr9:123945225-123945284	ref|NM_009914|ens|ENSMUST00000039171|ens|ENSMUST00000165925|gb|AK089875		A_52_P661044	NM_009914	ref|Mus musculus chemokine (C-C motif) receptor 3 (Ccr3), mRNA [NM_009914]	Ccr3	0.0573774	6.08233	1	0.0941947	11.6855	1.64167	0.193889	13.879	3.3792	0.281999	18.9507	4.91482
mm|chr14:33157957-33158113	ref|NM_001081130|ens|ENSMUST00000022480|gb|BC157971|gb|BC157970		A_51_P163354	NM_001081130	ref|Mus musculus oxoglutarate dehydrogenase-like (Ogdhl), nuclear gene encoding mitochondrial protein, mRNA [NM_001081130]	Ogdhl	0.0645942	6.84735	1	0.143014	17.7419	2.21404	0.421727	30.1882	6.52888	0.317465	21.334	4.91476
mm|chr6:71243825-71250126	ens|ENSMUST00000114185		A_66_P116873	ENSMUST00000114185	ens|predicted gene 1070 [Source:MGI Symbol;Acc:MGI:2685916] [ENSMUST00000114185]	ENSMUST00000114185	0.0508162	5.38681	1	0.127817	15.8567	2.51529	0.299669	21.451	5.89712	0.249593	16.7729	4.91167
mm|chr3:34800365-34800424			A_30_P01024681	chr3:34793853-34800591_F	lincRNA:chr3:34793853-34800591 forward strand	chr3:34793853-34800591_F	0.0423681	4.49126	1	0.074492	9.24127	1.75821	0.103708	7.42366	2.44779	0.208097	13.9843	4.91164
mm|chr17:64212206-64212147	ref|XR_107096|gb|AK044233|gb|AK039032|tc|TC1598412		A_52_P21951	XR_107096	ref|PREDICTED: Mus musculus RIKEN cDNA A930002H24 gene (A930002H24Rik), miscRNA [XR_107096]	A930002H24Rik	0.0567889	6.01995	1	0.0428267	5.31297	0.754139	0.10529	7.53691	1.85406	0.27873	18.731	4.90818
mm|chr3:17972345-17972286	ref|NM_007825|ens|ENSMUST00000035625|gb|AK013034|gb|BC038810		A_51_P461429	NM_007825	ref|Mus musculus cytochrome P450, family 7, subfamily b, polypeptide 1 (Cyp7b1), mRNA [NM_007825]	Cyp7b1	0.3623	38.4059	1	0.0393584	4.8827	0.108635	0.96885	69.3525	2.67417	1.77729	119.436	4.90557
mm|chr14:78223664-78223605			A_30_P01028384	chr14:78223544-78224961_R	lincRNA:chr14:78223544-78224961 reverse strand	chr14:78223544-78224961_R	0.052832	5.6005	1	0.0458576	5.68897	0.867989	0.175261	12.5456	3.31732	0.259074	17.4101	4.90374
mm|chr12:86817900-86817959	ref|NM_010234|ens|ENSMUST00000021674|gb|AK159667|gb|AK159688		A_52_P262219	NM_010234	ref|Mus musculus FBJ osteosarcoma oncogene (Fos), mRNA [NM_010234]	Fos	0.672388	71.277	1	2.69096	333.834	4.0021	4.45557	318.94	6.62649	3.29463	221.403	4.89989
mm|chr11:31647668-31647609			A_30_P01031444	chr11:31647436-31647791_R	lincRNA:chr11:31647436-31647791 reverse strand	chr11:31647436-31647791_R	0.0451329	4.78434	1	0.0531789	6.59722	1.17827	0.0547678	3.9204	1.21348	0.221035	14.8538	4.89744
mm|chr19:57434103-57434044			A_30_P01033150	chr19:57426515-57435165_R	lincRNA:chr19:57426515-57435165 reverse strand	chr19:57426515-57435165_R	0.0478781	5.07536	1	0.0670809	8.32187	1.40108	0.181327	12.9798	3.78727	0.234382	15.7507	4.89538
mm|chr7:56748591-56748650	gb|AK129480		A_55_P2041240	AK129480	gb|Mus musculus mRNA for mKIAA3015 protein. [AK129480]	Nav2	0.0507055	5.37507	1	0.0957427	11.8776	1.88821	0.13114	9.38726	2.5863	0.248218	16.6805	4.8953
mm|chr4:42972193-42972252	ens|ENSMUST00000084662|ens|ENSMUST00000037872|ens|ENSMUST00000098112|gb|AK158972		A_55_P2058557	ENSMUST00000084662	ens|DnaJ (Hsp40) homolog, subfamily B, member 5 [Source:MGI Symbol;Acc:MGI:1930018] [ENSMUST00000084662]	Dnajb5	0.0451587	4.78708	1	0.0788337	9.77989	1.7457	0.0551677	3.94903	1.22164	0.220998	14.8513	4.8938
mm|chr9:22006274-22006333	ref|NM_001033813|gb|AK137156|tc|TC1591246|riken|9530015I07		A_55_P2164524	NM_001033813	ref|Mus musculus zinc finger protein 872 (Zfp872), mRNA [NM_001033813]	Zfp872	0.0921728	9.77084	1	0.108147	13.4165	1.17331	0.388746	27.8273	4.21758	0.450807	30.2948	4.8909
mm|chr7:142073757-142073698	ref|NM_001143802|ens|ENSMUST00000171394|gb|AK046846|riken|B830028B13		A_55_P1987430	NM_001143802	ref|Mus musculus family with sequence similarity 196, member A (Fam196a), mRNA [NM_001143802]	Fam196a	0.0545689	5.78462	1	0.101612	12.6058	1.86209	0.0675502	4.83539	1.23789	0.266574	17.9141	4.88508
mm|chr6:70336930-70336871	ens|ENSMUST00000103392|gb|BC082779|tc|TC1691598|nap|NAP027639-1		A_52_P400905	ENSMUST00000103392	ens|immunoglobulin kappa variable 8-16 [Source:MGI Symbol;Acc:MGI:1330843] [ENSMUST00000103392]	ENSMUST00000103392	0.0436858	4.63095	1	0.0382785	4.74873	0.876222	0.0541599	3.87689	1.23976	0.213356	14.3378	4.88388
mm|chr4:96183298-96183239	ref|NM_010008|ens|ENSMUST00000030303|gb|AK078893|tc|TC1623536		A_52_P231292	NM_010008	ref|Mus musculus cytochrome P450, family 2, subfamily j, polypeptide 6 (Cyp2j6), mRNA [NM_010008]	Cyp2j6	0.0528193	5.59915	1	0.0691032	8.57275	1.30829	0.344096	24.6312	6.51459	0.257871	17.3292	4.88213
mm|chr5:33556676-33556617	ref|NM_133903|ens|ENSMUST00000046186|gb|AK042840|gb|AK131131		A_52_P381484	NM_133903	ref|Mus musculus spondin 2, extracellular matrix protein (Spon2), mRNA [NM_133903]	Spon2	0.310434	32.9077	1	0.711942	88.3216	2.29338	1.42457	101.974	4.58897	1.5153	101.83	4.88125
mm|chr1:134181181-134181122			A_30_P01022651	chr1:134167181-134181457_R	lincRNA:chr1:134167181-134181457 reverse strand	chr1:134167181-134181457_R	0.0612103	6.48864	1	0.0912515	11.3204	1.49079	0.112328	8.04071	1.83512	0.298502	20.0597	4.87666
mm|chr5:119411200-119411259	ref|NR_040694|gb|AK015127|tc|TC1622025|riken|4930413E15		A_55_P2371301	NR_040694	ref|Mus musculus RIKEN cDNA 4930413E15 gene (4930413E15Rik), non-coding RNA [NR_040694]	4930413E15Rik	0.0444038	4.70706	1	0.130808	16.2276	2.94587	0.259694	18.5895	5.84846	0.216535	14.5514	4.8765
mm|chr7:115225189-115225248	ref|NM_146925|ens|ENSMUST00000067143|gb|BC160284|tc|NP592241		A_55_P2146837	NM_146925	ref|Mus musculus olfactory receptor 481 (Olfr481), mRNA [NM_146925]	Olfr481	0.0438264	4.64586	1	0.0385643	4.78419	0.879933	0.147936	10.5896	3.37549	0.213549	14.3507	4.8726
mm|chr15:6602484-6602543	ref|NM_011815|ens|ENSMUST00000110659|ens|ENSMUST00000090461|gb|BC141352		A_55_P2006869	NM_011815	ref|Mus musculus FYN binding protein (Fyb), mRNA [NM_011815]	Fyb	0.0642169	6.80736	1	0.0474925	5.89178	0.739563	0.0587268	4.2038	0.914507	0.312694	21.0134	4.86934
mm|chr12:106414705-106414764	ref|NM_013776|ref|NM_013773|ens|ENSMUST00000105217|ens|ENSMUST00000000717		A_55_P1961628	NM_013776	ref|Mus musculus T-cell leukemia/lymphoma 1B, 5 (Tcl1b5), mRNA [NM_013776]	Tcl1b5	0.0477755	5.06448	1	0.0410113	5.08775	0.858416	0.0589526	4.21996	1.23395	0.232512	15.625	4.86675
mm|chr8:36881021-36881080	ref|XM_987122|ref|XM_003084762		A_55_P2090645	XM_987122	ref|PREDICTED: Mus musculus predicted gene 501 (Gm501), mRNA [XM_987122]	Gm501	0.057182	6.06162	1	0.0492471	6.10947	0.861236	0.0671378	4.80587	1.17411	0.278236	18.6978	4.86581
mm|chr9:38402686-38402745	ref|NM_001011523|ens|ENSMUST00000081095|nap|NAP115350-1		A_55_P2050528	NM_001011523	ref|Mus musculus olfactory receptor 913 (Olfr913), mRNA [NM_001011523]	Olfr913	0.0507312	5.3778	1	0.0444614	5.51576	0.876411	0.0638121	4.56782	1.25785	0.246615	16.5728	4.86121
mm|chr12:17012498-17012439	ref|NM_001201332|ref|NM_001201333|ens|ENSMUST00000095823|gb|AK010406		A_55_P2040054	NM_001201332	ref|Mus musculus RIKEN cDNA 2410004P03 gene (2410004P03Rik), transcript variant 1, mRNA [NM_001201332]	2410004P03Rik	0.0528713	5.60466	1	0.0457408	5.67448	0.865135	0.0654112	4.68228	1.23718	0.2569	17.264	4.85896
mm|chr6:124817765-124817706	ref|NM_013488|ens|ENSMUST00000145977|ens|ENSMUST00000095454|ens|ENSMUST00000145818		A_52_P383089	NM_013488	ref|Mus musculus CD4 antigen (Cd4), mRNA [NM_013488]	Cd4	0.121446	12.874	1	0.0449891	5.58123	0.370444	0.0497314	3.55988	0.409492	0.590086	39.6544	4.85882
mm|chr9:99286449-99286390	ref|NM_008624|ens|ENSMUST00000035045|gb|AK013800|gb|BC023079		A_52_P203798	NM_008624	ref|Mus musculus muscle and microspikes RAS (Mras), mRNA [NM_008624]	Mras	0.166437	17.6433	1	0.413242	51.2657	2.48287	0.327505	23.4435	1.96774	0.808319	54.3199	4.85659
mm|chr14:56270566-56270625	ref|NM_001253888|ref|NM_027673|ref|NM_001253889|ens|ENSMUST00000007735		A_66_P101013	NM_001253888	ref|Mus musculus testis-specific serine kinase 4 (Tssk4), transcript variant 3, mRNA [NM_001253888]	Tssk4	0.0674984	7.15522	1	0.245264	30.4268	3.63363	0.7012	50.1934	10.3884	0.327807	22.029	4.85652
mm|chr16:84706005-84706064			A_30_P01024571	chr16:84702353-84710928_F	lincRNA:chr16:84702353-84710928 forward strand	chr16:84702353-84710928_F	0.0493455	5.2309	1	0.134033	16.6277	2.71621	0.09935	7.1117	2.01336	0.239537	16.0972	4.85429
mm|chr16:4868013-4868072			A_30_P01021453	chr16:4867322-4874772_F	lincRNA:chr16:4867322-4874772 forward strand	chr16:4867322-4874772_F	1.04555	110.834	1	1.19002	147.63	1.13818	4.15574	297.477	3.9747	5.07538	341.071	4.85428
mm|chr11:59186230-59186171	ref|NM_001045521|ens|ENSMUST00000061481|gb|AK145810|tc|TC1616113		A_55_P2157160	NM_001045521	ref|Mus musculus protease, serine, 38 (Prss38), mRNA [NM_001045521]	Prss38	0.0486412	5.15625	1	0.0426339	5.28905	0.876498	0.0613436	4.39111	1.26114	0.236007	15.8599	4.85199
mm|chr5:143197360-143197301			A_30_P01024858	chr5:143196275-143207575_R	lincRNA:chr5:143196275-143207575 reverse strand	chr5:143196275-143207575_R	0.0502486	5.32664	1	0.092879	11.5223	1.84839	0.126925	9.08554	2.52593	0.243605	16.3705	4.84799
mm|chr4:43833424-43833365	ref|NM_019474|ens|ENSMUST00000079465|gb|BC101957|gb|BC101961		A_66_P106572	NM_019474	ref|Mus musculus olfactory receptor 156 (Olfr156), mRNA [NM_019474]	Olfr156	0.053816	5.7048	1	0.0946126	11.7374	1.75808	0.10457	7.48538	1.94311	0.260606	17.513	4.84254
mm|chrX:69254862-69254921	ref|NM_007724|ens|ENSMUST00000006020|gb|AK132574|gb|BC048775		A_51_P423948	NM_007724	ref|Mus musculus cyclic nucleotide gated channel alpha 2 (Cnga2), mRNA [NM_007724]	Cnga2	0.051223	5.42993	1	0.126495	15.6926	2.46949	0.0853047	6.1063	1.66536	0.247828	16.6543	4.83823
mm|chr8:41018159-41018100	gb|AK133033|riken|4930557G05		A_55_P2101618	AK133033	gb|Mus musculus adult male testis cDNA, RIKEN full-length enriched library, clone:4930557G05 product:hypothetical protein, full insert sequence. [AK133033]	Gm10682	0.0407731	4.32218	1	0.0354697	4.40028	0.869931	0.0489293	3.50247	1.20004	0.197147	13.2485	4.83524
mm|chr5:104035678-104035619	ref|NM_029415|ens|ENSMUST00000031263|gb|AJ583504|gb|BC139343		A_55_P2015074	NM_029415	ref|Mus musculus solute carrier family 10 (sodium/bile acid cotransporter family), member 6 (Slc10a6), mRNA [NM_029415]	Slc10a6	0.129731	13.7522	1	0.128931	15.9948	0.993831	0.931045	66.6463	7.17674	0.626841	42.1244	4.83186
mm|chr3:100737869-100737928	ref|NM_001165953|ref|NM_194343|ens|ENSMUST00000037409|ens|ENSMUST00000163914		A_55_P2116315	NM_001165953	ref|Mus musculus tripartite motif-containing 45 (Trim45), transcript variant 1, mRNA [NM_001165953]	Trim45	0.043815	4.64464	1	0.0853386	10.5869	1.9477	0.138105	9.88589	3.15201	0.211651	14.2232	4.83056
mm|chr10:069072752-069072693			A_55_P2132536	A_55_P2132536	Unknown	A_55_P2132536	0.0518713	5.49866	1	0.0501	6.21527	0.965852	0.158524	11.3475	3.0561	0.250493	16.8334	4.82913
mm|chr7:135025776-135025835	ref|NM_172749|ens|ENSMUST00000098017|ens|ENSMUST00000170187|ens|ENSMUST00000050383		A_55_P2022789	NM_172749	ref|Mus musculus zinc finger protein 646 (Zfp646), mRNA [NM_172749]	Zfp646	0.0549117	5.82095	1	0.103766	12.8729	1.88969	0.163297	11.6892	2.97381	0.265156	17.8188	4.82877
mm|chr6:112280072-112280131	ref|NM_144799|ens|ENSMUST00000089151|ens|ENSMUST00000032376|gb|AK159946		A_51_P405912	NM_144799	ref|Mus musculus LIM and cysteine-rich domains 1 (Lmcd1), mRNA [NM_144799]	Lmcd1	0.696591	73.8426	1	0.965424	119.768	1.38593	3.21676	230.263	4.61786	3.36157	225.901	4.82575
mm|chr11:53362951-53363010	ens|ENSMUST00000121334|gb|AW049736|tc|TC1644482		A_51_P367298	ENSMUST00000121334	ens|septin 8 [Source:MGI Symbol;Acc:MGI:894310] [ENSMUST00000121334]	2012-09-08	0.54148	57.4	1	1.38678	172.041	2.5611	2.49507	178.602	4.60786	2.61283	175.585	4.82535
mm|chr1:37892400-37892341	ref|NM_207228|ens|ENSMUST00000114901|ens|ENSMUST00000151735|ens|ENSMUST00000155852		A_55_P2013751	NM_207228	ref|Mus musculus testis specific 10 (Tsga10), mRNA [NM_207228]	Tsga10	0.0518241	5.49365	1	0.0451691	5.60355	0.871584	0.0653859	4.68047	1.26169	0.250024	16.8019	4.82447
mm|chr18:35974854-35974913			A_30_P01021658	chr18:35974770-35975091_F	lincRNA:chr18:35974770-35975091 forward strand	chr18:35974770-35975091_F	0.0489081	5.18454	1	0.0457927	5.68091	0.936299	0.0943631	6.75473	1.9294	0.235931	15.8548	4.82396
mm|chr11:66848203-66848262	ref|NM_177392|ens|ENSMUST00000079077|ens|ENSMUST00000061786|gb|AK043094		A_55_P1960688	NM_177392	ref|Mus musculus transmembrane protein 220 (Tmem220), mRNA [NM_177392]	Tmem220	0.0420275	4.45515	1	0.103551	12.8463	2.46389	0.19277	13.7989	4.58677	0.202727	13.6235	4.82369
mm|chr3:40976448-40976389			A_30_P01029275	chr3:40966969-40976585_R	lincRNA:chr3:40966969-40976585 reverse strand	chr3:40966969-40976585_R	0.0407488	4.31961	1	0.0354917	4.403	0.870987	0.157705	11.2889	3.87018	0.196335	13.1939	4.81818
mm|chr6:31288141-31288200			A_30_P01022914	chr6:31267612-31293337_F	lincRNA:chr6:31267612-31293337 forward strand	chr6:31267612-31293337_F	0.0476571	5.05193	1	0.0983916	12.2062	2.06457	0.058466	4.18513	1.2268	0.229581	15.4281	4.81736
mm|chr11:49933697-49933756			A_30_P01031706	chr11:49933305-49934805_F	lincRNA:chr11:49933305-49934805 forward strand	chr11:49933305-49934805_F	0.0479613	5.08417	1	0.0403808	5.00953	0.841945	0.0561008	4.01582	1.16971	0.230819	15.5113	4.81262
mm|chr8:91574577-91574636			A_30_P01026309	chr8:91569369-91594119_F	lincRNA:chr8:91569369-91594119 forward strand	chr8:91569369-91594119_F	0.139696	14.8086	1	1.11306	138.083	7.96769	0.985984	70.579	7.05805	0.672018	45.1603	4.81056
mm|chr5:88361449-88361508	ens|ENSMUST00000001667|gb|AK085710|gb|M10114|gb|AK164788		A_51_P227275	ENSMUST00000001667	ens|casein kappa [Source:MGI Symbol;Acc:MGI:107461] [ENSMUST00000001667]	Csn3	0.173893	18.4337	1	0.0893592	11.0857	0.513874	0.602121	43.1012	3.46259	0.836346	56.2034	4.80954
mm|chr19:21469334-21469275	ref|NM_010266|ens|ENSMUST00000087600|gb|AK079459|gb|AK139617		A_52_P116006	NM_010266	ref|Mus musculus guanine deaminase (Gda), mRNA [NM_010266]	Gda	1.32825	140.802	1	1.35689	168.331	1.02156	6.38902	457.34	4.8101	6.38818	429.293	4.80947
mm|chr11:75722473-75722414	ref|NM_029548|ens|ENSMUST00000152035|ens|ENSMUST00000108421|ens|ENSMUST00000066504		A_55_P2037386	NM_029548	ref|Mus musculus rabphilin 3A-like (without C2 domains) (Rph3al), mRNA [NM_029548]	Rph3al	0.0455669	4.83035	1	0.164634	20.4241	3.61302	0.0536952	3.84362	1.17838	0.21906	14.7211	4.80744
mm|chrX:91000578-91000519			A_30_P01022594	chrX:90997595-91009570_R	lincRNA:chrX:90997595-91009570 reverse strand	chrX:90997595-91009570_R	3.22665	342.043	1	4.51571	560.206	1.3995	12.2657	878.006	3.80137	15.5021	1041.76	4.80438
mm|chr16:8757157-8757098			A_30_P01020526	chr16:8738782-8830148_R	lincRNA:chr16:8738782-8830148 reverse strand	chr16:8738782-8830148_R	0.0439392	4.65781	1	0.0387987	4.81326	0.883007	0.0542114	3.88057	1.23378	0.210861	14.1701	4.79892
mm|chr13:53113556-53113615			A_30_P01019060	chr13:53100475-53113850_F	lincRNA:chr13:53100475-53113850 forward strand	chr13:53100475-53113850_F	0.052889	5.60653	1	0.0459359	5.69868	0.868534	0.0656309	4.69801	1.24092	0.253672	17.047	4.79631
mm|chr5:73037864-73037923	gb|CA463412		A_55_P2306690	CA463412	gb|AGENCOURT_10722575 NIH_MGC_169 Mus musculus cDNA clone IMAGE:6770805 5', mRNA sequence [CA463412]	4933408A14Rik	0.0417446	4.42516	1	0.0526124	6.52695	1.26034	0.0498163	3.56596	1.19336	0.200196	13.4534	4.79573
mm|chr1:75363404-75363629	ref|NM_010043|gb|L22550|gb|AK131922|gb|BC031760		A_51_P335969	NM_010043	ref|Mus musculus desmin (Des), mRNA [NM_010043]	Des	0.087201	9.24381	1	0.0388695	4.82204	0.445746	0.0776214	5.55631	0.890143	0.418189	28.1028	4.79569
mm|chr10:33846270-33846211	ref|NM_175449|ens|ENSMUST00000062784|gb|AK153519|gb|AK080048		A_51_P100852	NM_175449	ref|Mus musculus family with sequence similarity 26, member F (Fam26f), mRNA [NM_175449]	Fam26f	0.0434144	4.60218	1	0.0374058	4.64046	0.861598	0.0512748	3.67037	1.18106	0.208185	13.9902	4.79529
mm|chr4:106227360-106227301	ens|ENSMUST00000137882|gb|AK012503|tc|TC1748971|riken|2700068H02		A_55_P2248330	ENSMUST00000137882	ens|RIKEN cDNA 2700068H02 gene [Source:MGI Symbol;Acc:MGI:1919813] [ENSMUST00000137882]	ENSMUST00000137882	0.0971534	10.2988	1	0.4743	58.8403	4.88196	0.642015	45.9569	6.60826	0.465193	31.2615	4.78823
mm|chr19:13308928-13308987	ref|NM_001011840|ens|ENSMUST00000064102|gb|BC148479|gb|BC153075		A_51_P222115	NM_001011840	ref|Mus musculus olfactory receptor 1463 (Olfr1463), mRNA [NM_001011840]	Olfr1463	0.0467668	4.95754	1	0.0400905	4.97352	0.857244	0.0552087	3.95196	1.18051	0.223672	15.031	4.78272
mm|chr4:128623373-128623314	ref|NM_172875|ens|ENSMUST00000030581|ens|ENSMUST00000128820|ens|ENSMUST00000106068		A_55_P2084248	NM_172875	ref|Mus musculus arginine decarboxylase (Adc), mRNA [NM_172875]	Adc	0.363808	38.5657	1	0.598847	74.2913	1.64605	1.85	132.427	5.08509	1.73877	116.847	4.77935
mm|chr14:55673729-55673788			A_30_P01017498	chr14:55672705-55675212_F	lincRNA:chr14:55672705-55675212 forward strand	chr14:55672705-55675212_F	0.0488909	5.18271	1	0.04234	5.25258	0.866009	0.0611468	4.37702	1.25068	0.233661	15.7023	4.77924
mm|chr6:86224838-86224897	ref|NM_031199|ens|ENSMUST00000032066|gb|U65016|gb|AK162680		A_51_P415126	NM_031199	ref|Mus musculus transforming growth factor alpha (Tgfa), mRNA [NM_031199]	Tgfa	0.0515767	5.46742	1	0.229516	28.4731	4.44999	0.141896	10.1572	2.75117	0.246473	16.5632	4.77876
mm|chr6:121220874-121220933	ref|NM_011909|ens|ENSMUST00000032198|gb|AF069502|gb|AK149772		A_55_P2114953	NM_011909	ref|Mus musculus ubiquitin specific peptidase 18 (Usp18), mRNA [NM_011909]	Usp18	0.3455	36.625	1	0.350928	43.5352	1.01571	2.90479	207.931	8.40749	1.65079	110.935	4.77796
mm|chr8:87428881-87428940	ref|NM_010635|ens|ENSMUST00000067060|gb|BC114978|gb|AK158037		A_51_P168630	NM_010635	ref|Mus musculus Kruppel-like factor 1 (erythroid) (Klf1), mRNA [NM_010635]	Klf1	0.0539443	5.7184	1	0.0555196	6.88762	1.0292	0.0637875	4.56605	1.18247	0.257574	17.3093	4.77482
mm|chr13:38243361-38243302	ens|ENSMUST00000078232|gb|AK037084|tc|TC1649893|riken|9930111A01		A_55_P2003678	ENSMUST00000078232	ens|predicted gene 10129 [Source:MGI Symbol;Acc:MGI:3641890] [ENSMUST00000078232]	ENSMUST00000078232	0.0459639	4.87244	1	0.0401778	4.98435	0.874115	0.0578085	4.13806	1.25769	0.219441	14.7467	4.77419
mm|chr2:27396062-27396003			A_30_P01027311	chr2:27394711-27402186_R	lincRNA:chr2:27394711-27402186 reverse strand	chr2:27394711-27402186_R	0.076517	8.11124	1	0.0405887	5.03533	0.530454	0.0544254	3.89589	0.711285	0.365285	24.5476	4.77391
mm|chr9:112815440-112815499			A_55_P1994167	A_55_P1994167	Unknown	A_55_P1994167	0.0499397	5.2939	1	0.0615414	7.63465	1.23231	0.210128	15.0414	4.20763	0.238349	16.0174	4.77274
mm|chr7:51209619-51209678	ref|NM_008457|ens|ENSMUST00000072204|gb|X03994|gb|BC031798		A_51_P155503	NM_008457	ref|Mus musculus kallikrein 1-related peptidase b8 (Klk1b8), mRNA [NM_008457]	Klk1b8	0.0572579	6.06966	1	0.111461	13.8276	1.94666	0.0632892	4.53038	1.10534	0.27315	18.356	4.77052
mm|chr14:27210653-27210712			A_30_P01032083	chr14:27176652-27227602_F	lincRNA:chr14:27176652-27227602 forward strand	chr14:27176652-27227602_F	0.0473513	5.01951	1	0.0409065	5.07475	0.863894	0.0845099	6.04941	1.78474	0.225808	15.1745	4.76877
mm|chr10:75412326-75412385	ref|NM_009514|ens|ENSMUST00000000926|gb|BC062250|gb|AK008794		A_55_P2136906	NM_009514	ref|Mus musculus pre-B lymphocyte gene 3 (Vpreb3), mRNA [NM_009514]	Vpreb3	0.0498278	5.28203	1	0.0688427	8.54044	1.38161	0.163685	11.7169	3.28501	0.237443	15.9564	4.76526
mm|chr4:140508441-140508500	ref|NM_008812|ens|ENSMUST00000030765|gb|D16580|gb|BC040350		A_55_P2091359	NM_008812	ref|Mus musculus peptidyl arginine deiminase, type II (Padi2), mRNA [NM_008812]	Padi2	0.0403506	4.27739	1	0.0353968	4.39123	0.877231	0.0497566	3.56169	1.23311	0.192235	12.9184	4.76412
mm|chr5:100849833-100849774			A_30_P01033331	chr5:100845342-100869667_R	lincRNA:chr5:100845342-100869667 reverse strand	chr5:100845342-100869667_R	0.236394	25.0591	1	0.399163	49.5191	1.68855	1.07649	77.0578	4.5538	1.1252	75.6146	4.75984
mm|chr3:40967699-40967640			A_30_P01018792	chr3:40966969-40976585_R	lincRNA:chr3:40966969-40976585 reverse strand	chr3:40966969-40976585_R	0.0490429	5.19883	1	0.0424738	5.26919	0.866054	0.150745	10.7907	3.07374	0.233429	15.6867	4.75968
mm|chr13:108657197-108657256			A_30_P01032264	chr13:108548345-108679004_F	lincRNA:chr13:108548345-108679004 forward strand	chr13:108548345-108679004_F	0.0427266	4.52926	1	0.0699311	8.67546	1.63671	0.0532059	3.8086	1.24526	0.203314	13.6629	4.75849
mm|chr4:129379636-129379577			A_30_P01026565	chr4:129376440-129391690_R	lincRNA:chr4:129376440-129391690 reverse strand	chr4:129376440-129391690_R	0.04124	4.37168	1	0.0356119	4.41791	0.863528	0.693746	49.6599	16.8222	0.196234	13.1871	4.75834
mm|chr15:103329100-103329159	ref|NM_153505|ens|ENSMUST00000047405|ens|ENSMUST00000170900|gb|AK037534		A_51_P119429	NM_153505	ref|Mus musculus NCK associated protein 1 like (Nckap1l), mRNA [NM_153505]	Nckap1l	0.04839	5.12961	1	0.0835039	10.3593	1.72565	0.0601561	4.30611	1.24315	0.230176	15.4681	4.75669
mm|chr17:25971835-25971776	ref|NM_144816|ens|ENSMUST00000026831|gb|AK140428|gb|BC023948		A_52_P256757	NM_144816	ref|Mus musculus rhomboid, veinlet-like 1 (Drosophila) (Rhbdl1), mRNA [NM_144816]	Rhbdl1	0.0556916	5.90362	1	0.206191	25.5795	3.70238	0.483926	34.6405	8.6894	0.264907	17.802	4.75667
mm|chr15:12286944-12286885	ref|NM_001081064|ens|ENSMUST00000075317		A_55_P1966254	NM_001081064	ref|Mus musculus PDZ domain containing 2 (Pdzd2), mRNA [NM_001081064]	Pdzd2	0.0452293	4.79457	1	0.0392936	4.87466	0.868764	0.0559832	4.00741	1.23776	0.215079	14.4535	4.7553
mm|chr15:75868266-75868325	gb|AK016717|tc|TC1601120|riken|4933407E14|nap|NAP073406-1		A_55_P2253284	AK016717	gb|Mus musculus adult male testis cDNA, RIKEN full-length enriched library, clone:4933407E14 product:unclassifiable, full insert sequence. [AK016717]	4933407E14Rik	0.0568081	6.02198	1	0.171327	21.2544	3.01589	0.138712	9.92934	2.44177	0.269891	18.137	4.75092
mm|chr5:77079006-77079065	gb|AK032119|tc|TC1621536|riken|6330597M22|nap|NAP075032-1		A_55_P2106941	AK032119	gb|Mus musculus adult male medulla oblongata cDNA, RIKEN full-length enriched library, clone:6330597M22 product:unclassifiable, full insert sequence. [AK032119]	AK032119	0.0469426	4.97618	1	0.04113	5.10248	0.876177	0.0580126	4.15267	1.23582	0.223005	14.9862	4.75058
mm|chr4:45959077-45959136	ref|NM_198660|ens|ENSMUST00000149903|tc|TC1647409|nap|NAP018455-001		A_55_P2032184	NM_198660	ref|Mus musculus RIKEN cDNA E230008N13 gene (E230008N13Rik), mRNA [NM_198660]	E230008N13Rik	0.0511539	5.42261	1	0.0448507	5.56405	0.876779	0.064234	4.59802	1.2557	0.24299	16.3292	4.75016
mm|chr3:95503169-95503110			A_30_P01032218	chr3:95502970-95503399_R	lincRNA:chr3:95502970-95503399 reverse strand	chr3:95502970-95503399_R	0.065174	6.90882	1	0.111613	13.8464	1.71253	0.139154	9.96096	2.13512	0.309557	20.8026	4.7497
mm|chr11:8916135-8916076	ref|NM_177576|ens|ENSMUST00000102909|ens|ENSMUST00000043377|gb|AK052771		A_55_P2040860	NM_177576	ref|Mus musculus Sad1 and UNC84 domain containing 3 (Sun3), mRNA [NM_177576]	Sun3	0.0468695	4.96843	1	0.0409548	5.08074	0.873806	0.0589117	4.21703	1.25693	0.222569	14.9569	4.7487
mm|chr13:14160621-14160680	gb|AK039302|gb|AK163456|riken|A330019B12|riken|B230113G15		A_55_P2321125	AK039302	gb|Mus musculus adult male spinal cord cDNA, RIKEN full-length enriched library, clone:A330019B12 product:hypothetical protein, full insert sequence. [AK039302]	D230040A04Rik	0.0486213	5.15414	1	0.0657108	8.1519	1.35148	0.490279	35.0953	10.0836	0.230547	15.493	4.74168
mm|chr12:4134867-4134808			A_30_P01030920	chr12:4133875-4243375_R	lincRNA:chr12:4133875-4243375 reverse strand	chr12:4133875-4243375_R	0.0451077	4.78168	1	0.0820175	10.1749	1.81826	0.0587408	4.2048	1.30223	0.213772	14.3657	4.73914
mm|chr5:113611443-113611384			A_30_P01017731	chr5:113609906-113622032_R	lincRNA:chr5:113609906-113622032 reverse strand	chr5:113609906-113622032_R	0.072811	7.71838	1	0.0698997	8.67157	0.960016	0.253589	18.1525	3.48284	0.344882	23.1765	4.73668
mm|chr1:135271556-135271615			A_55_P2067563	A_55_P2067563	Unknown	A_55_P2067563	1.21488	128.785	1	1.50817	187.099	1.24141	4.72053	337.906	3.88559	5.75388	386.667	4.73616
mm|chr9:61076237-61076178			A_30_P01026596	chr9:61076051-61076314_R	lincRNA:chr9:61076051-61076314 reverse strand	chr9:61076051-61076314_R	0.0645316	6.84071	1	0.135005	16.7484	2.09208	0.260167	18.6233	4.03162	0.30489	20.4889	4.72466
mm|chr16:31324318-31324377			A_30_P01024228	chr16:31321192-31333486_F	lincRNA:chr16:31321192-31333486 forward strand	chr16:31321192-31333486_F	0.180978	19.1847	1	0.112341	13.9367	0.620743	0.450297	32.2333	2.48813	0.854441	57.4194	4.72125
mm|chr6:71339667-71339608	ref|NM_024288|ens|ENSMUST00000149415|ens|ENSMUST00000002292|gb|BC034085		A_52_P200207	NM_024288	ref|Mus musculus required for meiotic nuclear division 5 homolog A (S. cerevisiae) (Rmnd5a), mRNA [NM_024288]	Rmnd5a	0.0489593	5.18996	1	0.13524	16.7775	2.7623	0.232698	16.657	4.75289	0.231126	15.5319	4.72079
mm|chr5:115072774-115072715	ref|NM_022017|ens|ENSMUST00000071968|ens|ENSMUST00000133019|ens|ENSMUST00000112225		A_55_P2137421	NM_022017	ref|Mus musculus transient receptor potential cation channel, subfamily V, member 4 (Trpv4), mRNA [NM_022017]	Trpv4	0.0619419	6.56619	1	0.25489	31.6209	4.11498	0.334261	23.9272	5.39637	0.292244	19.6391	4.71803
mm|chr11:72893544-72893603	ref|NM_025818|ens|ENSMUST00000021135|gb|AK166563|gb|AK004766		A_51_P101660	NM_025818	ref|Mus musculus RIKEN cDNA 1200014J11 gene (1200014J11Rik), mRNA [NM_025818]	1200014J11Rik	0.206525	21.8928	1	0.20621	25.5819	0.998474	0.290441	20.7905	1.40632	0.973991	65.4533	4.71609
mm|chr19:39683488-39683429	ref|NM_001024719|ens|ENSMUST00000067328|gb|AK149389|gb|BC092260		A_55_P1962661	NM_001024719	ref|Mus musculus cytochrome P450, family 2, subfamily c, polypeptide 67 (Cyp2c67), mRNA [NM_001024719]	Cyp2c67	0.0503736	5.3399	1	0.11582	14.3683	2.29922	0.0640623	4.58572	1.27174	0.237203	15.9403	4.70887
mm|chr6:34823772-34823831	ref|NM_197986|ens|ENSMUST00000074949|gb|AK003535|gb|BC023802		A_52_P463977	NM_197986	ref|Mus musculus transmembrane protein 140 (Tmem140), mRNA [NM_197986]	Tmem140	3.11819	330.546	1	5.65698	701.789	1.81418	14.9522	1070.31	4.79514	14.6829	986.707	4.70878
mm|chr3:95503091-95503032			A_30_P01018721	chr3:95502970-95503399_R	lincRNA:chr3:95502970-95503399 reverse strand	chr3:95502970-95503399_R	3.19787	338.993	1	5.04975	626.458	1.5791	11.8939	851.39	3.71931	15.0531	1011.58	4.70722
mm|chrX:159952697-159952638	ref|NM_008177|ens|ENSMUST00000033730|gb|BC113145|gb|AK033473		A_52_P646957	NM_008177	ref|Mus musculus gastrin releasing peptide receptor (Grpr), mRNA [NM_008177]	Grpr	0.100097	10.6109	1	0.141202	17.5171	1.41065	0.647098	46.3207	6.46471	0.47113	31.6605	4.70674
mm|chr8:72853479-72853538	ref|NM_001163282|ref|NM_138647|ens|ENSMUST00000165819|ens|ENSMUST00000140239		A_55_P2099947	NM_001163282	ref|Mus musculus growth differentiation factor 1 (Gdf1), transcript variant 1, mRNA [NM_001163282]	Gdf1	0.057637	6.10985	1	0.050004	6.20336	0.867567	0.0692086	4.95411	1.20077	0.271133	18.2204	4.70414
mm|chr11:72893544-72893603	ref|NM_025818|ens|ENSMUST00000021135|gb|AK166563|gb|AK004766		A_51_P101660	NM_025818	ref|Mus musculus RIKEN cDNA 1200014J11 gene (1200014J11Rik), mRNA [NM_025818]	1200014J11Rik	0.268845	28.4992	1	0.225735	28.0041	0.839647	0.28847	20.6493	1.073	1.26424	84.9587	4.7025
mm|chr15:74825612-74825553	ref|NM_010738|ens|ENSMUST00000023248|gb|J03636|gb|X04653		A_51_P265495	NM_010738	ref|Mus musculus lymphocyte antigen 6 complex, locus A (Ly6a), mRNA [NM_010738]	Ly6a	83.6611	8868.55	1	243.774	30241.9	2.91383	381.631	27318	4.56163	393.391	26436.3	4.7022
mm|chr13:3188510-3188569	ref|NR_001581|gb|AK006638|tc|TC1594941|riken|1700039A02		A_51_P115462	NR_001581	ref|Mus musculus spermatogenesis associated glutamate (E)-rich protein 6, pseudogene 1 (Speer6-ps1), non-coding RNA [NR_001581]	Speer6-ps1	0.0469939	4.98163	1	0.127672	15.8386	2.71678	0.0573968	4.10859	1.22137	0.220957	14.8485	4.70181
mm|chr5:31856583-31856524			A_30_P01026486	chr5:31856417-31916414_R	lincRNA:chr5:31856417-31916414 reverse strand	chr5:31856417-31916414_R	0.0449034	4.76002	1	0.0396303	4.91643	0.882568	0.0551395	3.94701	1.22796	0.211075	14.1845	4.70066
mm|chr1:107885542-107885483			A_30_P01027423	chr1:107885386-107886798_R	lincRNA:chr1:107885386-107886798 reverse strand	chr1:107885386-107886798_R	0.0469799	4.98014	1	0.0753002	9.34153	1.60282	0.0779891	5.58264	1.66005	0.220653	14.8281	4.69676
mm|chr9:58312406-58312465			A_30_P01018608	chr9:58301467-58323783_F	lincRNA:chr9:58301467-58323783 forward strand	chr9:58301467-58323783_F	0.0511748	5.42483	1	0.0450927	5.59408	0.88115	0.0622783	4.45802	1.21697	0.240169	16.1396	4.69312
mm|chr9:4417955-4417896	ref|NM_001113180|ref|NM_019691|ens|ENSMUST00000027020|ens|ENSMUST00000063508		A_55_P1987725	NM_001113180	ref|Mus musculus glutamate receptor, ionotropic, AMPA4 (alpha 4) (Gria4), transcript variant 2, mRNA [NM_001113180]	Gria4	0.0456794	4.84228	1	0.0526602	6.53288	1.15282	0.221346	15.8445	4.84564	0.214265	14.3989	4.69063
mm|chr13:50570661-50570720	ref|NM_001033400|ens|ENSMUST00000096633|gb|AK133253|tc|TC1596146		A_55_P1993965	NM_001033400	ref|Mus musculus predicted gene 806 (Gm806), mRNA [NM_001033400]	Gm806	0.0437673	4.63958	1	0.0376988	4.67681	0.861346	0.0518441	3.71112	1.18454	0.205273	13.7946	4.6901
mm|chr13:74741685-74741626			A_30_P01031562	chr13:74738675-74756950_R	lincRNA:chr13:74738675-74756950 reverse strand	chr13:74738675-74756950_R	0.0512801	5.43599	1	0.0454527	5.63874	0.886361	0.122879	8.79597	2.39623	0.24048	16.1605	4.68954
mm|chr3:94295991-94296049	ref|NM_172434|ens|ENSMUST00000029784|gb|AK044506|gb|BC031740		A_51_P106591	NM_172434	ref|Mus musculus CUGBP, Elav-like family member 3 (Celf3), mRNA [NM_172434]	Celf3	0.0621803	6.59147	1	0.0360344	4.47034	0.579516	0.0931333	6.66669	1.49779	0.29157	19.5938	4.6891
unmapped	gb|DV065341		A_55_P2395732	DV065341	gb|NEONATAL_25_H23.x1 FH NEONATAL Mus musculus cDNA clone NEONATAL_25_H23 similar to Protein phosphatase 1 regulatory subunit 10, mRNA sequence [DV065341]	2810427A07Rik	0.110066	11.6676	1	0.158274	19.6351	1.438	0.353983	25.3389	3.2161	0.516045	34.6788	4.6885
mm|chr1:74607121-74607180	gb|AK039149|ens|ENSMUST00000113745|riken|A230102I21|nap|NAP116661-1		A_55_P2140696	AK039149	gb|Mus musculus adult male hypothalamus cDNA, RIKEN full-length enriched library, clone:A230102I21 product:phospholipase C, delta 4, full insert sequence. [AK039149]	Plcd4	0.0428801	4.54553	1	0.0502628	6.23547	1.17217	0.0642633	4.60011	1.49867	0.20096	13.5047	4.68655
mm|chr4:109329073-109329014	ref|XR_104877|ref|XR_107609|gb|AK052880|gb|AK035877		A_52_P118706	XR_104877	ref|PREDICTED: Mus musculus RIKEN cDNA 9630013D21 gene (9630013D21Rik), miscRNA [XR_104877]	9630013D21Rik	0.0429764	4.55575	1	0.0942192	11.6886	2.19235	0.0491584	3.51887	1.14385	0.201273	13.5258	4.68335
mm|chr12:113720198-113720257			A_30_P01031170	chr12:113719791-113720260_F	lincRNA:chr12:113719791-113720260 forward strand	chr12:113719791-113720260_F	0.0451259	4.7836	1	0.0800753	9.93392	1.77449	0.0702811	5.03088	1.55744	0.211254	14.1965	4.68143
mm|chr11:118311218-118311277	ref|NM_001204129|ref|NM_019959|ref|NM_001204130|ens|ENSMUST00000017590		A_55_P1998539	NM_001204129	ref|Mus musculus C1q and tumor necrosis factor related protein 1 (C1qtnf1), transcript variant 1, mRNA [NM_001204129]	C1qtnf1	1.07426	113.878	1	2.21954	275.351	2.06612	4.55675	326.183	4.24176	5.02859	337.927	4.68098
mm|chr2:87814777-87814718	ref|NM_054091|ens|ENSMUST00000099840|gb|AB061229|gb|BC140281		A_51_P123314	NM_054091	ref|Mus musculus olfactory receptor 74 (Olfr74), mRNA [NM_054091]	Olfr74	0.0637387	6.75667	1	0.14601	18.1136	2.29075	0.323286	23.1415	5.07205	0.298107	20.0331	4.67701
mm|chr18:36481441-36481500			A_30_P01032423	chr18:36481237-36481819_F	lincRNA:chr18:36481237-36481819 forward strand	chr18:36481237-36481819_F	0.131793	13.9708	1	0.302162	37.4854	2.2927	0.414778	29.6908	3.1472	0.616383	41.4216	4.6769
mm|chr9:86595175-86595234	gb|AK039418|gb|XR_105312|tc|TC1588732|riken|A330041J22		A_55_P2337159	AK039418	gb|Mus musculus adult male spinal cord cDNA, RIKEN full-length enriched library, clone:A330041J22 product:hypothetical protein, full insert sequence. [AK039418]	A330041J22Rik	0.0467423	4.95495	1	0.0400878	4.97319	0.857635	0.0681316	4.87702	1.4576	0.218448	14.68	4.67347
mm|chr19:9158256-9158197	ref|NM_011681|ens|ENSMUST00000025554|gb|X67702|gb|AK145844		A_51_P128575	NM_011681	ref|Mus musculus secretoglobin, family 1A, member 1 (uteroglobin) (Scgb1a1), mRNA [NM_011681]	Scgb1a1	0.106517	11.2914	1	0.116485	14.4509	1.09358	0.286168	20.4845	2.68659	0.497768	33.4505	4.67312
mm|chr12:86613408-86613349	ref|NM_025421|ens|ENSMUST00000008966|gb|BC096417		A_55_P2062015	NM_025421	ref|Mus musculus acylphosphatase 1, erythrocyte (common) type (Acyp1), mRNA [NM_025421]	Acyp1	0.102396	10.8546	1	0.195654	24.2723	1.91076	0.253556	18.1501	2.47623	0.478073	32.127	4.66886
mm|chr2:170032744-170032803			A_30_P01026953	chr2:170029045-170034220_F	lincRNA:chr2:170029045-170034220 forward strand	chr2:170029045-170034220_F	0.100512	10.6549	1	0.149732	18.5754	1.48969	0.230944	16.5315	2.29767	0.469203	31.531	4.66812
mm|chr1:166079660-166079719	ref|NM_011347|ens|ENSMUST00000086043|ens|ENSMUST00000161020|ens|ENSMUST00000162746		A_51_P211854	NM_011347	ref|Mus musculus selectin, platelet (Selp), mRNA [NM_011347]	Selp	0.38611	40.9299	1	1.08785	134.955	2.81745	1.26682	90.682	3.28099	1.80181	121.083	4.66656
mm|chr12:102252936-102252995	gb|AK079713|gb|BB200459|tc|TC1638974|riken|A430024J22		A_66_P107760	AK079713	gb|Mus musculus 0 day neonate thymus cDNA, RIKEN full-length enriched library, clone:A430024J22 product:unclassifiable, full insert sequence. [AK079713]	AK079713	0.0707439	7.49926	1	0.0811381	10.0658	1.14693	0.13967	9.9979	1.97431	0.329968	22.1742	4.66427
mm|chr14:78220938-78220997			A_30_P01020237	chr14:78214602-78225827_F	lincRNA:chr14:78214602-78225827 forward strand	chr14:78214602-78225827_F	0.0577671	6.12365	1	0.110826	13.7488	1.9185	0.0778552	5.57305	1.34774	0.269354	18.1009	4.66275
mm|chr15:57793758-57793817	ens|ENSMUST00000110178|ens|ENSMUST00000161329|nap|NAP101432-1		A_55_P2105819	ENSMUST00000110178	ens|WD repeat domain 67 [Source:MGI Symbol;Acc:MGI:2684931] [ENSMUST00000110178]	Wdr67	0.155541	16.4883	1	0.163572	20.2923	1.05163	0.516891	37.0002	3.32317	0.725164	48.7318	4.6622
mm|chr5:77204144-77204085			A_30_P01030027	chr5:77188300-77205150_R	lincRNA:chr5:77188300-77205150 reverse strand	chr5:77188300-77205150_R	0.050833	5.38859	1	0.0689559	8.55448	1.35652	0.194732	13.9394	3.83082	0.236786	15.9123	4.65812
mm|chr12:16543754-16543695	ref|NM_001130412|ref|NM_015763|ref|NM_172950|ens|ENSMUST00000067124		A_55_P2083481	NM_001130412	ref|Mus musculus lipin 1 (Lpin1), transcript variant 3, mRNA [NM_001130412]	Lpin1	0.142141	15.0678	1	0.400927	49.738	2.82062	0.795357	56.9334	5.59553	0.661924	44.482	4.6568
mm|chr6:40718815-40718874			A_30_P01029478	chr6:40693617-40720167_F	lincRNA:chr6:40693617-40720167 forward strand	chr6:40693617-40720167_F	0.103817	11.0052	1	0.235416	29.205	2.26761	0.283718	20.3092	2.73288	0.483194	32.4711	4.6543
mm|chr18:25877572-25877631	gb|AK002931|tc|TC1706550|riken|0710001A04|nap|NAP090126-1		A_55_P2202357	AK002931	gb|Mus musculus adult male brain cDNA, RIKEN full-length enriched library, clone:0710001A04 product:unclassifiable, full insert sequence. [AK002931]	0710001A04Rik	0.042786	4.53556	1	0.0860149	10.6708	2.01035	0.261448	18.7151	6.11061	0.199094	13.3794	4.65326
mm|chr8:128185494-128185435	gb|BB618401		A_55_P2298158	BB618401	gb|BB618401 RIKEN full-length enriched, 8 days embryo Mus musculus cDNA clone 5730403G06 5', mRNA sequence [BB618401]	D8Ertd620e	0.0492265	5.21829	1	0.0426663	5.29307	0.866735	0.0574809	4.11462	1.16768	0.22903	15.3911	4.65258
mm|chr19:10739508-10739567	ref|NM_027913|ens|ENSMUST00000055115|gb|AK153937|gb|AK005010		A_51_P125648	NM_027913	ref|Mus musculus von Willebrand factor C and EGF domains (Vwce), mRNA [NM_027913]	Vwce	0.0415629	4.4059	1	0.0548953	6.81016	1.32078	0.0488905	3.49969	1.1763	0.193323	12.9915	4.65135
mm|chr13:74741745-74741686			A_30_P01021255	chr13:74738675-74756950_R	lincRNA:chr13:74738675-74756950 reverse strand	chr13:74738675-74756950_R	0.0921239	9.76566	1	0.205633	25.5103	2.23214	0.344133	24.6338	3.73555	0.428261	28.7796	4.64875
mm|chr2:84837766-84837707	ref|NM_145526|gb|AK141847|riken|D130018N16		A_55_P1992430	NM_145526	ref|Mus musculus purinergic receptor P2X, ligand-gated ion channel, 3 (P2rx3), mRNA [NM_145526]	P2rx3	0.484643	51.3749	1	0.422106	52.3653	0.870962	0.773766	55.3879	1.59657	2.25287	151.395	4.64852
mm|chrX:66056806-66056865	ref|NM_174993|ref|NM_001166619|ref|NM_001166620|ens|ENSMUST00000071848		A_55_P2115318	NM_174993	ref|Mus musculus fragile X mental retardation 1 neighbor (Fmr1nb), transcript variant 1, mRNA [NM_174993]	Fmr1nb	0.0438833	4.65188	1	0.038324	4.75438	0.873318	0.134668	9.63983	3.06877	0.203821	13.697	4.64462
mm|chr10:51305336-51305277	ref|NM_029894|ens|ENSMUST00000020064|gb|AK020485|gb|BC147085		A_51_P103594	NM_029894	ref|Mus musculus family with sequence similarity 162, member B (Fam162b), mRNA [NM_029894]	Fam162b	0.0512253	5.43017	1	0.0550119	6.82463	1.07392	0.0663277	4.74788	1.29482	0.237894	15.9867	4.64407
mm|chr17:9898345-9898286			A_30_P01032837	chr17:9898206-9919226_R	lincRNA:chr17:9898206-9919226 reverse strand	chr17:9898206-9919226_R	0.0440566	4.67026	1	0.0391814	4.86074	0.889342	0.0580613	4.15616	1.31788	0.20446	13.7399	4.64083
unmapped			A_55_P2140745	A_55_P2140745	Unknown	A_55_P2140745	0.0921889	9.77255	1	0.062546	7.75929	0.678455	0.545094	39.019	5.91279	0.427747	28.7451	4.6399
mm|chr3:109946407-109946348	gb|AK053689|gb|AK020842|tc|TC1627196|riken|E130203P04		A_51_P213099	AK053689	gb|Mus musculus 0 day neonate eyeball cDNA, RIKEN full-length enriched library, clone:E130203P04 product:hypothetical protein, full insert sequence. [AK053689]	Ntng1	0.0519346	5.50536	1	0.106856	13.2562	2.05751	0.184982	13.2414	3.56183	0.240857	16.1859	4.6377
mm|chr15:85688962-85689021	ref|NM_001033337|ens|ENSMUST00000109414|ens|ENSMUST00000146088|tc|TC1615364		A_55_P1970583	NM_001033337	ref|Mus musculus tetratricopeptide repeat domain 38 (Ttc38), mRNA [NM_001033337]	Ttc38	0.317081	33.6124	1	0.497362	61.7014	1.56857	1.17816	84.3356	3.71566	1.46929	98.7377	4.6338
mm|chr6:41066375-41066434	ens|ENSMUST00000103268|gb|X02785|gb|M34195|gb|U21479		A_66_P107484	ENSMUST00000103268	ens|T-cell receptor beta, variable 13-1 [Source:MGI Symbol;Acc:MGI:98609] [ENSMUST00000103268]	ENSMUST00000103268	0.0658034	6.97554	1	0.21331	26.4626	3.24162	0.236659	16.9406	3.59645	0.304866	20.4873	4.63298
mm|chr10:3428887-3428946	ref|NM_001170801|ref|NM_001170802|ens|ENSMUST00000144622|ens|ENSMUST00000154998		A_66_P124677	NM_001170801	ref|Mus musculus interaction protein for cytohesin exchange factors 1 (Ipcef1), transcript variant 2, mRNA [NM_001170801]	Ipcef1	0.0491904	5.21447	1	0.0393589	4.88276	0.800133	0.0690262	4.94105	1.40324	0.227871	15.3132	4.63243
mm|chr15:78681374-78681315	ref|NM_025622|ens|ENSMUST00000044584|gb|AK007364|gb|AK008607		A_52_P563375	NM_025622	ref|Mus musculus lectin, galactose-binding, soluble 2 (Lgals2), mRNA [NM_025622]	Lgals2	0.0537767	5.70064	1	0.0466965	5.79304	0.86834	0.108394	7.75908	2.01563	0.248978	16.7316	4.62985
mm|chr6:40711041-40711100			A_30_P01032177	chr6:40693617-40720167_F	lincRNA:chr6:40693617-40720167 forward strand	chr6:40693617-40720167_F	0.0437655	4.63939	1	0.0471214	5.84575	1.07668	0.0524369	3.75355	1.19813	0.202619	13.6162	4.62965
mm|chr14:55589640-55589581	ref|NM_080728|ens|ENSMUST00000102803|gb|AJ223362|gb|AK147031		A_55_P2093232	NM_080728	ref|Mus musculus myosin, heavy polypeptide 7, cardiac muscle, beta (Myh7), mRNA [NM_080728]	Myh7	0.047482	5.03336	1	0.0670695	8.32046	1.41252	0.233178	16.6914	4.91087	0.219705	14.7644	4.62713
mm|chr14:20899068-20899127			A_30_P01024663	chr14:20893694-20903726_F	lincRNA:chr14:20893694-20903726 forward strand	chr14:20893694-20903726_F	0.0446521	4.73338	1	0.0602469	7.47407	1.34925	0.054928	3.93187	1.23013	0.206557	13.8808	4.62591
mm|chr1:95197441-95197500	ens|ENSMUST00000062202|gb|AJ584850|riken|D430044C15|nap|NAP122592-001		A_52_P550147	ENSMUST00000062202	ens|sushi, nidogen and EGF-like domains 1 [Source:MGI Symbol;Acc:MGI:3045960] [ENSMUST00000062202]	Sned1	5.78678	613.432	1	14.3482	1780	2.47948	18.0187	1289.82	3.11376	26.7443	1797.24	4.62161
mm|chr4:131737855-131737796			A_30_P01030692	chr4:131737612-131738100_R	lincRNA:chr4:131737612-131738100 reverse strand	chr4:131737612-131738100_R	0.0443304	4.69927	1	0.122659	15.2168	2.76694	0.226719	16.229	5.1143	0.204807	13.7632	4.62001
mm|chr11:48679128-48679069	ref|NM_008326|ens|ENSMUST00000169066|ens|ENSMUST00000049519|gb|BC145957		A_51_P262171	NM_008326	ref|Mus musculus immunity-related GTPase family M member 1 (Irgm1), mRNA [NM_008326]	Irgm1	2.67863	283.95	1	4.06139	503.845	1.51622	17.1323	1226.37	6.39591	12.3713	831.366	4.61852
mm|chr2:50917398-50917457			A_30_P01022025	chr2:50917152-50917519_F	lincRNA:chr2:50917152-50917519 forward strand	chr2:50917152-50917519_F	0.0517481	5.48559	1	0.131116	16.2659	2.53374	0.140586	10.0635	2.71674	0.238955	16.058	4.61766
mm|chr8:106815119-106815060	ens|ENSMUST00000109450|gb|AK006874|tc|TC1623948|riken|1700063K20		A_55_P2056792	ENSMUST00000109450	ens|CKLF-like MARVEL transmembrane domain containing 2A [Source:MGI Symbol;Acc:MGI:2447160] [ENSMUST00000109450]	Cmtm2a	0.0608891	6.45459	1	0.066933	8.30352	1.09926	0.0812139	5.81348	1.3338	0.281161	18.8943	4.61759
mm|chr6:122752095-122752154			A_30_P01025772	chr6:122725638-122752828_F	lincRNA:chr6:122725638-122752828 forward strand	chr6:122725638-122752828_F	0.0540586	5.73052	1	0.128872	15.9876	2.38394	0.33089	23.6859	6.12095	0.249548	16.7699	4.61625
mm|chr9:91255484-91255425	ref|NM_009573|ens|ENSMUST00000065360|gb|BC063247|gb|BC060247		A_51_P194230	NM_009573	ref|Mus musculus zinc finger protein of the cerebellum 1 (Zic1), mRNA [NM_009573]	Zic1	0.0456542	4.8396	1	0.0587849	7.2927	1.28761	0.390727	27.9691	8.55841	0.210712	14.1601	4.61539
mm|chr7:20539169-20539228	ens|ENSMUST00000094754		A_66_P100419	ENSMUST00000094754	ens|ribosomal protein L7A, pseudogene 8 [Source:MGI Symbol;Acc:MGI:3644288] [ENSMUST00000094754]	ENSMUST00000094754	0.0486652	5.15879	1	0.158551	19.6695	3.258	0.117171	8.38735	2.40769	0.224469	15.0846	4.61252
mm|chrY_random:026828387-026828328			A_55_P1978920	A_55_P1978920	Unknown	A_55_P1978920	0.109577	11.6158	1	0.048612	6.03067	0.443632	0.0689228	4.93365	0.628989	0.505167	33.9478	4.61015
mm|chr7:28749862-28749803	ref|NM_001081021|ens|ENSMUST00000081618|gb|AK045524|tc|TC1601208		A_55_P2025572	NM_001081021	ref|Mus musculus zinc finger protein 780B (Zfp780b), mRNA [NM_001081021]	Zfp780b	0.0513649	5.44498	1	0.174435	21.6399	3.39598	0.251433	17.9982	4.89504	0.236736	15.9089	4.6089
mm|chr7:99240856-99240797	gb|AK016242|riken|4930567K12|nap|NAP074676-1		A_55_P2328647	AK016242	gb|Mus musculus adult male testis cDNA, RIKEN full-length enriched library, clone:4930567K12 product:unclassifiable, full insert sequence. [AK016242]	4930567K12Rik	0.0565251	5.99198	1	0.118201	14.6637	2.09112	0.124527	8.91391	2.20304	0.26051	17.5066	4.60875
mm|chr1:091292966-091293025			A_55_P2017169	A_55_P2017169	Unknown	A_55_P2017169	0.0405132	4.29463	1	0.049688	6.16416	1.22647	0.0497571	3.56172	1.22817	0.186562	12.5372	4.60497
mm|chr5:112231326-112231385			A_30_P01030895	chr5:112205091-112240992_F	lincRNA:chr5:112205091-112240992 forward strand	chr5:112205091-112240992_F	0.378884	40.1639	1	0.52394	64.9985	1.38285	1.0812	77.3944	2.85363	1.74356	117.169	4.60182
mm|chr7:111557637-111557578	ref|NM_009099|ens|ENSMUST00000166432|ens|ENSMUST00000076922|gb|AF220014		A_51_P275454	NM_009099	ref|Mus musculus tripartite motif-containing 30A (Trim30a), mRNA [NM_009099]	Trim30a	0.124767	13.226	1	0.248933	30.882	1.99519	0.844585	60.4573	6.76932	0.574005	38.5738	4.60063
mm|chr1:175850595-175850536	ref|NM_001045481|ref|NM_008328|ens|ENSMUST00000042228|ens|ENSMUST00000081216		A_55_P1988202	NM_001045481	ref|Mus musculus interferon activated gene 203 (Ifi203), transcript variant 1, mRNA [NM_001045481]	Ifi203	0.172409	18.2763	1	0.0689912	8.55887	0.400161	1.40432	100.524	8.14528	0.793109	53.2978	4.60017
mm|chrX:8890144-8890203	ref|NM_023500|ens|ENSMUST00000015486|gb|BC054851|tc|TC1622655		A_52_P6828	NM_023500	ref|Mus musculus Kell blood group precursor (McLeod phenotype) homolog (Xk), mRNA [NM_023500]	Xk	0.0504784	5.351	1	0.0631228	7.83084	1.25049	0.0635271	4.54741	1.2585	0.232108	15.5979	4.59817
mm|chr11:78315393-78315665	ref|NM_011707|ens|ENSMUST00000153628|ens|ENSMUST00000017488|gb|AF440693		A_51_P109840	NM_011707	ref|Mus musculus vitronectin (Vtn), mRNA [NM_011707]	Vtn	0.0498666	5.28614	1	0.0429278	5.3255	0.860853	0.136192	9.74895	2.73113	0.229291	15.4086	4.59809
mm|chr17:24358462-24358521	gb|BC028777		A_55_P2247096	BC028777	gb|Mus musculus, clone IMAGE:1067795, mRNA. [BC028777]	BC028777	0.0673468	7.13915	1	0.108265	13.4311	1.60758	0.31535	22.5735	4.68248	0.309369	20.79	4.59367
mm|chr8:72405007-72404948	ref|NM_026818|ens|ENSMUST00000057831|tc|TC1645176|nap|NAP099644-001		A_55_P1996826	NM_026818	ref|Mus musculus cartilage intermediate layer protein 2 (Cilp2), mRNA [NM_026818]	Cilp2	0.0550201	5.83244	1	0.20323	25.2121	3.69374	0.240884	17.243	4.37811	0.252689	16.981	4.59267
mm|chr15:75261818-75260421	ref|NM_001039720|ens|ENSMUST00000096397|gb|BC147461|gb|BC147464		A_66_P122086	NM_001039720	ref|Mus musculus RIKEN cDNA 9030619P08 gene (9030619P08Rik), mRNA [NM_001039720]	9030619P08Rik	9.29739	985.577	1	28.7437	3565.87	3.09159	40.5369	2901.72	4.36003	42.6754	2867.83	4.59004
mm|chr16:16527402-16527343	ens|ENSMUST00000162542|tc|TC1705276		A_55_P2099267	ENSMUST00000162542	ens|FYVE, RhoGEF and PH domain containing 4 [Source:MGI Symbol;Acc:MGI:2183747] [ENSMUST00000162542]	Fgd4	0.0493552	5.23194	1	0.0424929	5.27155	0.860961	0.0937369	6.7099	1.89923	0.226475	15.2194	4.58868
mm|chr14:70937619-70937678	ref|NM_145219|ens|ENSMUST00000047331|gb|AF515590|gb|AK087125		A_51_P356967	NM_145219	ref|Mus musculus leucine-rich repeat LGI family, member 3 (Lgi3), mRNA [NM_145219]	Lgi3	0.0850193	9.01253	1	0.209266	25.961	2.4614	0.200608	14.36	2.35956	0.390107	26.2156	4.58845
mm|chr11:70279625-70279684	ref|NM_001029929|ens|ENSMUST00000136029|ens|ENSMUST00000108564|ens|ENSMUST00000039093		A_51_P108020	NM_001029929	ref|Mus musculus zinc finger, MYND-type containing 15 (Zmynd15), mRNA [NM_001029929]	Zmynd15	0.0512859	5.4366	1	0.0699171	8.67373	1.36328	0.0680846	4.87365	1.32755	0.235112	15.7998	4.58434
mm|chr14:77080068-77080127			A_30_P01024334	chr14:77077374-77086910_F	lincRNA:chr14:77077374-77086910 forward strand	chr14:77077374-77086910_F	0.0498591	5.28535	1	0.043436	5.38855	0.871174	0.097657	6.99051	1.95866	0.228439	15.3514	4.5817
mm|chr2:25354235-25354176	ref|NM_027062|ens|ENSMUST00000015227|ens|ENSMUST00000149062|ens|ENSMUST00000150580		A_55_P2151556	NM_027062	ref|Mus musculus complement component 8, gamma polypeptide (C8g), mRNA [NM_027062]	C8g	0.0648549	6.87499	1	0.143836	17.8439	2.21782	0.334451	23.9407	5.15691	0.297025	19.9604	4.57985
mm|chr10:3231740-3231799			A_30_P01023521	chr10:3231337-3231802_F	lincRNA:chr10:3231337-3231802 forward strand	chr10:3231337-3231802_F	0.0484631	5.13736	1	0.0545381	6.76585	1.12535	0.106565	7.62813	2.19888	0.22191	14.9126	4.57895
mm|chr2:130196035-130196094	ref|NM_001110513|ens|ENSMUST00000134728|ens|ENSMUST00000126740|ens|ENSMUST00000110286		A_55_P2011981	NM_001110513	ref|Mus musculus early B-cell factor 4 (Ebf4), mRNA [NM_001110513]	Ebf4	0.150904	15.9967	1	0.153822	19.0828	1.01934	0.41691	29.8433	2.76274	0.690358	46.3928	4.5748
mm|chr13:34208531-34208590			A_30_P01022634	chr13:34186976-34210579_F	lincRNA:chr13:34186976-34210579 forward strand	chr13:34186976-34210579_F	0.0423063	4.48471	1	0.0373926	4.63883	0.883854	0.0657082	4.70354	1.55315	0.193453	13.0002	4.57267
mm|chr6:65655964-65656023	ref|NM_172399|ens|ENSMUST00000054351|gb|AK017759|gb|AK020942		A_52_P442710	NM_172399	ref|Mus musculus RIKEN cDNA A930038C07 gene (A930038C07Rik), mRNA [NM_172399]	A930038C07Rik	0.0577914	6.12622	1	0.049842	6.18327	0.862447	0.0823233	5.89289	1.42449	0.264071	17.7458	4.56937
mm|chr17:29375052-29374993			A_30_P01026175	chr17:29374758-29387733_R	lincRNA:chr17:29374758-29387733 reverse strand	chr17:29374758-29387733_R	0.10511	11.1422	1	0.237416	29.4532	2.25875	0.391631	28.0338	3.72592	0.480196	32.2697	4.56852
mm|chr16:43623849-43623790			A_30_P01029747	chr16:43623581-43642715_R	lincRNA:chr16:43623581-43642715 reverse strand	chr16:43623581-43642715_R	0.0457934	4.85437	1	0.108193	13.4221	2.36262	0.0611549	4.37761	1.33545	0.209159	14.0557	4.56744
mm|chr1:71738585-71738526			A_30_P01032208	chr1:71730016-71740391_R	lincRNA:chr1:71730016-71740391 reverse strand	chr1:71730016-71740391_R	0.616687	65.3724	1	0.800183	99.2685	1.29755	2.07041	148.205	3.35731	2.81587	189.23	4.56613
mm|chr11:87403834-87403893	ref|NM_011129|ens|ENSMUST00000084575|ens|ENSMUST00000134923|ens|ENSMUST00000132723		A_51_P383991	NM_011129	ref|Mus musculus septin 4 (Sept4), nuclear gene encoding mitochondrial protein, mRNA [NM_011129]	2012-09-04	0.0427287	4.52949	1	0.0827235	10.2625	1.93602	0.236764	16.9481	5.54109	0.195017	13.1053	4.56406
mm|chr11:95629845-95629786			A_30_P01032827	chr11:95627874-95640824_R	lincRNA:chr11:95627874-95640824 reverse strand	chr11:95627874-95640824_R	0.127087	13.472	1	0.162482	20.1571	1.2785	0.287178	20.5568	2.25969	0.579897	38.9697	4.56298
mm|chr11:35821596-35821537	ref|NM_011856|ens|ENSMUST00000057207|ens|ENSMUST00000109310|ens|ENSMUST00000163524		A_55_P2011290	NM_011856	ref|Mus musculus odd Oz/ten-m homolog 2 (Drosophila) (Odz2), mRNA [NM_011856]	Odz2	0.0445185	4.71921	1	0.0384702	4.7725	0.864139	0.0520747	3.72762	1.16973	0.203117	13.6497	4.56253
mm|chr8:23469896-23469955	ref|NM_199257|ens|ENSMUST00000068928|ens|ENSMUST00000033870|ens|ENSMUST00000077194		A_55_P1971154	NM_199257	ref|Mus musculus transmembrane phosphatase with tensin homology (Tpte), mRNA [NM_199257]	Tpte	0.0510041	5.40672	1	0.0441068	5.47176	0.86477	0.0653739	4.67961	1.28174	0.232701	15.6378	4.56241
mm|chrX:34363809-34363750			A_30_P01028797	chrX:34360500-34388500_R	lincRNA:chrX:34360500-34388500 reverse strand	chrX:34360500-34388500_R	0.0796507	8.44342	1	0.12053	14.9526	1.51323	0.399271	28.5807	5.01277	0.363313	24.415	4.56133
mm|chr7:112184531-112184590	ref|NM_147095|ens|ENSMUST00000098162|gb|BC146397|gb|BC148829		A_55_P2005621	NM_147095	ref|Mus musculus olfactory receptor 676 (Olfr676), mRNA [NM_147095]	Olfr676	0.0501742	5.31875	1	0.0438346	5.438	0.873647	0.0606699	4.34289	1.20918	0.228756	15.3726	4.55923
mm|chr18:61144458-61144517	ref|NM_009792|ref|NM_177407|ens|ENSMUST00000115295|ens|ENSMUST00000102888		A_55_P2149209	NM_009792	ref|Mus musculus calcium/calmodulin-dependent protein kinase II alpha (Camk2a), transcript variant 1, mRNA [NM_009792]	Camk2a	0.0742821	7.87433	1	0.158845	19.7058	2.1384	0.207469	14.8511	2.79299	0.338538	22.7501	4.55746
mm|chr13:4089325-4089383	ref|NM_134072|ens|ENSMUST00000118717|ens|ENSMUST00000041768|gb|AK033537		A_55_P2007155	NM_134072	ref|Mus musculus aldo-keto reductase family 1, member C14 (Akr1c14), mRNA [NM_134072]	Akr1c14	0.0571925	6.06274	1	0.351996	43.6677	6.15458	0.24043	17.2105	4.20387	0.260645	17.5157	4.55733
mm|chr6:52053367-52053426			A_30_P01028792	chr6:052032838-052033444	lincRNA:chr6:52032838-52033444 forward strand	chr6:052032838-052033444	0.0434311	4.60394	1	0.0649247	8.05438	1.49489	0.0660478	4.72785	1.52075	0.197859	13.2963	4.55569
mm|chr15:84744043-84744102			A_30_P01022665	chr15:84737071-84744158_F	lincRNA:chr15:84737071-84744158 forward strand	chr15:84737071-84744158_F	0.0507222	5.37684	1	0.0444678	5.51656	0.876693	0.0669071	4.78936	1.31909	0.231074	15.5284	4.55568
mm|chr15:76498826-76498767	ref|NM_007989|ens|ENSMUST00000037824|gb|AF177770|gb|AF069303		A_55_P1973578	NM_007989	ref|Mus musculus forkhead box H1 (Foxh1), mRNA [NM_007989]	Foxh1	0.0525111	5.56647	1	0.19064	23.6503	3.63048	0.188021	13.459	3.5806	0.239013	16.0619	4.55167
mm|chr16:16753465-16753406	ref|NM_015773|ens|ENSMUST00000023468|gb|BC090660|gb|BC100455		A_51_P505967	NM_015773	ref|Mus musculus sperm associated antigen 6 (Spag6), mRNA [NM_015773]	Spag6	0.0405408	4.29756	1	0.035226	4.37004	0.868901	0.0499423	3.57498	1.2319	0.184379	12.3905	4.54799
mm|chr9:88614556-88614497			A_30_P01022523	chr9:88598702-88614632_R	lincRNA:chr9:88598702-88614632 reverse strand	chr9:88598702-88614632_R	1.31206	139.086	1	1.30357	161.717	0.993526	5.31413	380.398	4.05022	5.96304	400.723	4.54479
mm|chr1:88540136-88540077			A_30_P01029371	chr1:88524037-88540731_R	lincRNA:chr1:88524037-88540731 reverse strand	chr1:88524037-88540731_R	0.0517831	5.48931	1	0.0961692	11.9305	1.85715	0.0864612	6.18909	1.66968	0.235326	15.8141	4.54445
mm|chr7:138129081-138129140	ref|NM_019564|ens|ENSMUST00000006367|ens|ENSMUST00000153290|gb|AF172994		A_51_P225224	NM_019564	ref|Mus musculus HtrA serine peptidase 1 (Htra1), mRNA [NM_019564]	Htra1	14.1839	1503.58	1	24.954	3095.73	1.75932	82.0513	5873.42	5.78481	64.3667	4325.51	4.538
mm|chr11:96167130-96167189	ref|NM_008268|ens|ENSMUST00000049272|gb|M26283|gb|AK133512		A_51_P436342	NM_008268	ref|Mus musculus homeobox B5 (Hoxb5), mRNA [NM_008268]	Hoxb5	0.0407697	4.32183	1	0.0448046	5.55833	1.09897	0.0503936	3.60728	1.23605	0.184934	12.4277	4.53605
mm|chr9:27153573-27153632			A_30_P01028115	chr9:27153416-27153677_F	lincRNA:chr9:27153416-27153677 forward strand	chr9:27153416-27153677_F	0.053955	5.71954	1	0.0471965	5.85507	0.874739	0.0667099	4.77525	1.2364	0.244644	16.4404	4.53423
mm|chr12:33615353-33615412			A_30_P01027244	chr12:33606225-33638225_F	lincRNA:chr12:33606225-33638225 forward strand	chr12:33606225-33638225_F	0.0660256	6.99909	1	0.0708351	8.78761	1.07284	0.19701	14.1024	2.98385	0.29913	20.1019	4.53052
mm|chr11:99970420-99970361			A_30_P01033618	chr11:99970341-99973420_R	lincRNA:chr11:99970341-99973420 reverse strand	chr11:99970341-99973420_R	0.117093	12.4125	1	0.220023	27.2954	1.87904	0.661772	47.3711	5.65167	0.530462	35.6476	4.53026
mm|chr12:86817900-86817959	ref|NM_010234|ens|ENSMUST00000021674|gb|AK159667|gb|AK159688		A_52_P262219	NM_010234	ref|Mus musculus FBJ osteosarcoma oncogene (Fos), mRNA [NM_010234]	Fos	0.683173	72.4203	1	2.40847	298.788	3.52541	4.70568	336.843	6.88797	3.09388	207.912	4.52869
mm|chr5:144527095-144527154			A_30_P01023470	chr5:144519149-144527843_F	lincRNA:chr5:144519149-144527843 forward strand	chr5:144519149-144527843_F	0.0474481	5.02977	1	0.0653837	8.11133	1.378	0.0590684	4.22825	1.2449	0.214651	14.4248	4.52391
mm|chr8:63024408-63024467	ref|NM_011834|ens|ENSMUST00000079472|gb|AF072376|tc|TC1578461		A_55_P2059820	NM_011834	ref|Mus musculus aminoadipate aminotransferase (Aadat), mRNA [NM_011834]	Aadat	0.0437887	4.64185	1	0.0381798	4.73648	0.871911	0.054732	3.91784	1.24991	0.197942	13.3019	4.52039
mm|chr8:56199038-56199097	ref|XM_001474423|ref|XM_001474438|ref|XM_620863|nap|NAP112596-1		A_52_P737521	XM_001474423	ref|PREDICTED: Mus musculus predicted gene 2745 (Gm2745), mRNA [XM_001474423]	Gm2745	0.0782351	8.29336	1	0.102002	12.6541	1.30379	0.189886	13.5924	2.42712	0.353503	23.7558	4.51847
mm|chr11:58020927-58020986	ref|NM_018738|ens|ENSMUST00000035266|gb|AK152337|gb|AK151779		A_51_P112355	NM_018738	ref|Mus musculus interferon gamma induced GTPase (Igtp), mRNA [NM_018738]	Igtp	0.324292	34.3768	1	1.68653	209.226	5.20064	1.78273	127.612	5.49728	1.46452	98.417	4.51603
mm|chr6:99472591-99472532	gb|AK047332|riken|B930049P21|nap|NAP083634-1		A_66_P132890	AK047332	gb|Mus musculus 10 days neonate cerebellum cDNA, RIKEN full-length enriched library, clone:B930049P21 product:unclassifiable, full insert sequence. [AK047332]	B930049P21Rik	0.0528758	5.60513	1	0.117241	14.5446	2.2173	0.0883063	6.32116	1.67007	0.238708	16.0414	4.5145
mm|chr12:86817900-86817959	ref|NM_010234|ens|ENSMUST00000021674|gb|AK159667|gb|AK159688		A_52_P262219	NM_010234	ref|Mus musculus FBJ osteosarcoma oncogene (Fos), mRNA [NM_010234]	Fos	0.770301	81.6564	1	2.49934	310.061	3.24462	3.96297	283.679	5.1447	3.47478	233.509	4.51094
mm|chr15:92197024-92197083			A_30_P01020587	chr15:92174226-92201201_F	lincRNA:chr15:92174226-92201201 forward strand	chr15:92174226-92201201_F	0.0655055	6.94396	1	0.117455	14.5711	1.79305	0.233998	16.7501	3.57219	0.29547	19.8559	4.51062
mm|chr7:31200651-31202378	ref|NM_011662|ens|ENSMUST00000032800|gb|AF024637|gb|AF077829		A_51_P261517	NM_011662	ref|Mus musculus TYRO protein tyrosine kinase binding protein (Tyrobp), mRNA [NM_011662]	Tyrobp	0.153898	16.3141	1	0.68484	84.9594	4.44995	0.557665	39.9189	3.62359	0.693806	46.6245	4.50821
mm|chr16:11037191-11037250			A_30_P01031577	chr16:11024315-11055740_F	lincRNA:chr16:11024315-11055740 forward strand	chr16:11024315-11055740_F	0.107045	11.3474	1	0.0530942	6.58672	0.495998	0.0587135	4.20284	0.548493	0.48248	32.4232	4.50726
mm|chr1:85119128-85119069			A_30_P01032997	chr1:85117750-85129200_R	lincRNA:chr1:85117750-85129200 reverse strand	chr1:85117750-85129200_R	0.0415609	4.4057	1	0.0367805	4.56289	0.884978	0.108682	7.7797	2.615	0.1873	12.5868	4.50663
mm|chr9:58303812-58303871			A_30_P01020555	chr9:58301467-58323783_F	lincRNA:chr9:58301467-58323783 forward strand	chr9:58301467-58323783_F	0.0559032	5.92606	1	0.0386677	4.79701	0.691691	0.0555013	3.97291	0.992811	0.251883	16.9268	4.5057
mm|chr14:64569419-64569478	ref|NM_011446|ens|ENSMUST00000079652|gb|AK156497|gb|AB023419		A_51_P476018	NM_011446	ref|Mus musculus SRY-box containing gene 7 (Sox7), mRNA [NM_011446]	Sox7	0.0431103	4.56994	1	0.0630993	7.82792	1.46367	0.0781142	5.59159	1.81196	0.194108	13.0443	4.50259
mm|chr12:85772860-85772801	ref|NM_134042|ens|ENSMUST00000085192|ens|ENSMUST00000166796|gb|AK171581		A_55_P2101246	NM_134042	ref|Mus musculus aldehyde dehydrogenase family 6, subfamily A1 (Aldh6a1), nuclear gene encoding mitochondrial protein, mRNA [NM_134042]	Aldh6a1	0.0514304	5.45192	1	0.0801345	9.94126	1.55811	0.308591	22.0897	6.00017	0.231552	15.5605	4.50223
mm|chr11:48760808-48760749	ref|NM_001114679|ref|NM_001024230|ens|ENSMUST00000109209|ens|ENSMUST00000097494		A_55_P2015405	NM_001114679	ref|Mus musculus RIKEN cDNA 9930111J21 gene 1 (9930111J21Rik1), mRNA [NM_001114679]	9930111J21Rik1	0.133595	14.1618	1	0.114738	14.2341	0.858855	0.165843	11.8714	1.24139	0.601284	40.407	4.50081
mm|chr4:90877657-90877598			A_30_P01029101	chr4:90877414-90917198_R	lincRNA:chr4:90877414-90917198 reverse strand	chr4:90877414-90917198_R	0.0452574	4.79754	1	0.0406886	5.04771	0.899048	0.0568246	4.06763	1.25559	0.20345	13.6721	4.49541
mm|chr8:74232644-74232585	ref|NM_028715|ref|NR_028267|ens|ENSMUST00000098632|ens|ENSMUST00000136640		A_55_P2047461	NM_028715	ref|Mus musculus FCH domain only 1 (Fcho1), transcript variant 1, mRNA [NM_028715]	Fcho1	0.0609688	6.46305	1	0.143035	17.7446	2.34604	0.2584	18.4968	4.23822	0.273965	18.4108	4.49353
mm|chrX:49972043-49972102	ref|NR_045367|ens|ENSMUST00000114854|ens|ENSMUST00000068507|gb|AK041383		A_66_P117204	NR_045367	ref|Mus musculus RIKEN cDNA A630012P03 gene (A630012P03Rik), non-coding RNA [NR_045367]	A630012P03Rik	0.0579467	6.14268	1	0.0862437	10.6992	1.48833	0.272652	19.5171	4.70522	0.260296	17.4922	4.49199
mm|chr3:40457679-40457620			A_30_P01024884	chr3:40439525-40509975_R	lincRNA:chr3:40439525-40509975 reverse strand	chr3:40439525-40509975_R	0.101556	10.7655	1	0.0756981	9.3909	0.745385	0.0967583	6.92618	0.952761	0.456111	30.6512	4.49124
mm|chr18:60550839-60550898	ref|NM_001146275|ref|NM_021792|ens|ENSMUST00000032473|ens|ENSMUST00000066912		A_55_P1990633	NM_001146275	ref|Mus musculus interferon inducible GTPase 1 (Iigp1), transcript variant 2, mRNA [NM_001146275]	Iigp1	0.0482298	5.11263	1	0.0539527	6.69322	1.11866	0.151328	10.8324	3.13765	0.216542	14.5519	4.4898
mm|chr8:125063208-125063267			A_30_P01033175	chr8:125031410-125075960_F	lincRNA:chr8:125031410-125075960 forward strand	chr8:125031410-125075960_F	0.0788325	8.3567	1	0.04667	5.78975	0.592014	0.092107	6.59323	1.16839	0.353411	23.7496	4.48306
mm|chr3:62756051-62755992			A_30_P01021922	chr3:62727150-62758225_R	lincRNA:chr3:62727150-62758225 reverse strand	chr3:62727150-62758225_R	0.0507494	5.37973	1	0.136482	16.9316	2.68933	0.0649102	4.64642	1.27903	0.227508	15.2888	4.48297
mm|chr6:90759938-90759997			A_30_P01023982	chr6:90745692-90777977_F	lincRNA:chr6:90745692-90777977 forward strand	chr6:90745692-90777977_F	0.0632612	6.70605	1	0.0481803	5.97712	0.761609	0.0657177	4.70422	1.03883	0.283486	19.0506	4.4812
mm|chr4:32893154-32893095	ref|NM_001012450|ref|NM_080471|ref|NM_001012451|ens|ENSMUST00000108166		A_55_P2097533	NM_001012450	ref|Mus musculus ankyrin repeat domain 6 (Ankrd6), transcript variant 1, mRNA [NM_001012450]	Ankrd6	0.0478324	5.0705	1	0.182226	22.6064	3.80968	0.118021	8.44819	2.46738	0.214336	14.4036	4.48098
mm|chr15:101253718-101253777	ref|NM_033073|ens|ENSMUST00000131069|gb|AK146914|gb|AK002434		A_52_P410685	NM_033073	ref|Mus musculus keratin 7 (Krt7), mRNA [NM_033073]	Krt7	2.06218	218.603	1	3.74816	464.986	1.81757	11.2556	805.701	5.45811	9.23899	620.871	4.4802
mm|chr8:124365260-124365319			A_30_P01021047	chr8:124364048-124365705_F	lincRNA:chr8:124364048-124365705 forward strand	chr8:124364048-124365705_F	0.0561569	5.95296	1	0.0758752	9.41288	1.35113	0.0529614	3.7911	0.943097	0.25153	16.9031	4.47905
mm|chr16:64829379-64829438			A_30_P01022136	chr16:64796849-64843249_F	lincRNA:chr16:64796849-64843249 forward strand	chr16:64796849-64843249_F	0.0489232	5.18614	1	0.0440999	5.47091	0.901409	0.220277	15.7679	4.5025	0.219043	14.7199	4.47727
mm|chr19:21661679-21661738			A_30_P01017965	chr19:21653968-21671718_F	lincRNA:chr19:21653968-21671718 forward strand	chr19:21653968-21671718_F	0.0509181	5.39761	1	0.0565821	7.01942	1.11124	0.234837	16.8101	4.61205	0.227947	15.3183	4.47674
mm|chr9:104936317-104936376	ref|NM_028719|ens|ENSMUST00000057742|gb|AK014396|gb|BC043087		A_51_P105161	NM_028719	ref|Mus musculus copine IV (Cpne4), mRNA [NM_028719]	Cpne4	0.0569176	6.03359	1	0.0492531	6.1102	0.865339	0.115528	8.26978	2.02975	0.254774	17.1211	4.47619
mm|chr8:87513594-87513535			A_30_P01024362	chr8:87513394-87514107_R	lincRNA:chr8:87513394-87514107 reverse strand	chr8:87513394-87514107_R	0.0508757	5.39311	1	0.0439377	5.45079	0.863629	0.0653249	4.6761	1.28401	0.227718	15.3029	4.47597
mm|chr3:58125168-58125109			A_30_P01020818	chr3:58118325-58136550_R	lincRNA:chr3:58118325-58136550 reverse strand	chr3:58118325-58136550_R	0.0717557	7.60651	1	0.048606	6.02993	0.677382	0.0660623	4.72889	0.920656	0.321141	21.581	4.47548
mm|chr11:121478728-121478669	ref|NM_178664|ens|ENSMUST00000067399|gb|AK031361|gb|AK156318		A_51_P510106	NM_178664	ref|Mus musculus UDP-GlcNAc:betaGal beta-1,3-N-acetylglucosaminyltransferase-like 1 (B3gntl1), mRNA [NM_178664]	B3gntl1	0.276913	29.3543	1	0.518108	64.275	1.87101	1.20988	86.6057	4.36916	1.23905	83.2657	4.47452
mm|chr7:135069907-135069848	ref|NM_133351|ens|ENSMUST00000084541|ens|ENSMUST00000098016|ens|ENSMUST00000032988		A_55_P2071191	NM_133351	ref|Mus musculus protease, serine, 8 (prostasin) (Prss8), mRNA [NM_133351]	Prss8	0.0447952	4.74855	1	0.161493	20.0343	3.60513	0.326186	23.3491	7.28171	0.200334	13.4627	4.47222
mm|chr18:84303765-84303824			A_30_P01022654	chr18:84303291-84303890_F	lincRNA:chr18:84303291-84303890 forward strand	chr18:84303291-84303890_F	0.0571783	6.06123	1	0.0496433	6.15861	0.868218	0.110113	7.88211	1.92577	0.255689	17.1826	4.47178
mm|chr13:113831408-113831349	ens|ENSMUST00000099162|ref|XM_003084946|gb|AK140654|riken|B930072A22		A_55_P2002109	ENSMUST00000099162	ens|predicted gene 10735 [Source:MGI Symbol;Acc:MGI:3642476] [ENSMUST00000099162]	Gm10735	0.058116	6.16062	1	0.0958356	11.8891	1.64904	0.195424	13.9889	3.36266	0.259851	17.4623	4.47126
mm|chr12:115850516-115850457	gb|AY171990|gb|FN652769|gb|FN652766|gb|FN652768		A_55_P2129334	AY171990	gb|Mus musculus clone L2MZB-13.3 immunoglobulin heavy chain variable region mRNA, partial cds. [AY171990]	AY171990	0.0502554	5.32736	1	0.059435	7.37335	1.18266	0.19461	13.9306	3.87242	0.22469	15.0994	4.47096
mm|chr6:82637218-82637277			A_30_P01019176	chr6:82608223-82669023_F	lincRNA:chr6:82608223-82669023 forward strand	chr6:82608223-82669023_F	0.0403102	4.27311	1	0.128713	15.9678	3.19307	0.0495051	3.54368	1.2281	0.18019	12.109	4.47009
mm|chr6:48794048-48794107	ref|NM_025326|ref|NM_001098271|ens|ENSMUST00000101426|ens|ENSMUST00000168406		A_52_P515094	NM_025326	ref|Mus musculus transmembrane protein 176A (Tmem176a), transcript variant 1, mRNA [NM_025326]	Tmem176a	0.99989	105.994	1	0.345881	42.9091	0.345919	3.50244	250.712	3.50282	4.46632	300.142	4.46681
mm|chr7:111496655-111496596	ref|NM_001146007|ref|NM_175677|ens|ENSMUST00000098178|ens|ENSMUST00000130139		A_55_P2064652	NM_001146007	ref|Mus musculus tripartite motif-containing 12C (Trim12c), transcript variant 1, mRNA [NM_001146007]	Trim12c	0.0671915	7.12268	1	0.125998	15.631	1.87521	0.344658	24.6714	5.12949	0.300005	20.1607	4.46493
mm|chr17:29194652-29194593			A_30_P01021484	lincP21	lincRNA:chr17:29194418-29215906 reverse strand	lincP21	0.056247	5.96251	1	0.0486512	6.03553	0.864956	0.0662357	4.7413	1.17759	0.251139	16.8768	4.46493
mm|chr7:30510343-30510284	ref|NM_029714|ref|NM_001164658|ens|ENSMUST00000048659|ens|ENSMUST00000167064		A_52_P375809	NM_029714	ref|Mus musculus cation channel, sperm-associated, gamma 2 (Catsperg2), mRNA [NM_029714]	Catsperg2	0.131693	13.9603	1	0.178998	22.206	1.3592	0.473618	33.9027	3.59637	0.587469	39.4786	4.46089
mm|chr3:108766872-108766813			A_30_P01018624	chr3:108763862-108772151_R	lincRNA:chr3:108763862-108772151 reverse strand	chr3:108763862-108772151_R	0.203626	21.5855	1	0.322335	39.988	1.58298	0.779987	55.8333	3.83049	0.90774	61.0011	4.45788
mm|chr6:90258839-90258780	ref|NM_027928|ens|ENSMUST00000070890|gb|AK004401|tc|TC1622946		A_51_P211786	NM_027928	ref|Mus musculus carbohydrate (chondroitin 4) sulfotransferase 13 (Chst13), mRNA [NM_027928]	Chst13	0.0450003	4.77028	1	0.0963589	11.954	2.1413	0.209615	15.0047	4.65808	0.200045	13.4432	4.44541
mm|chr17:014131318-014131259	nap|NAP068989-1		A_55_P2114736	NAP068989-1	Unknown	NAP068989-1	0.0568016	6.02129	1	0.0431621	5.35457	0.759875	0.0605835	4.3367	1.06658	0.252445	16.9646	4.44433
mm|chr19:4207945-4208004			A_30_P01032421	chr19:4207767-4208004_F	lincRNA:chr19:4207767-4208004 forward strand	chr19:4207767-4208004_F	0.0400405	4.24452	1	0.0346717	4.30128	0.865917	0.0516876	3.69991	1.29088	0.177947	11.9582	4.44417
mm|chr4:122893248-122893307	ref|NM_001085502|ens|ENSMUST00000068262|gb|BC147309|gb|BC147308		A_55_P2029583	NM_001085502	ref|Mus musculus 5'-nucleotidase, cytosolic IA (Nt5c1a), mRNA [NM_001085502]	Nt5c1a	0.0592152	6.27715	1	0.0971523	12.0525	1.64067	0.313812	22.4634	5.29953	0.263046	17.677	4.44221
mm|chr3:35789143-35789084			A_30_P01023205	chr3:35782698-35789748_R	lincRNA:chr3:35782698-35789748 reverse strand	chr3:35782698-35789748_R	0.0474193	5.02671	1	0.0415768	5.15791	0.876792	0.0735473	5.26468	1.551	0.210528	14.1477	4.43972
mm|chr2:104511849-104511790	gb|AK081811|tc|TC1603986|riken|C130078N14|nap|NAP084316-1		A_55_P2256646	AK081811	gb|Mus musculus 16 days embryo head cDNA, RIKEN full-length enriched library, clone:C130078N14 product:unclassifiable, full insert sequence. [AK081811]	C130078N14	0.127247	13.4889	1	0.233999	29.0293	1.83894	0.559133	40.024	4.39409	0.564887	37.961	4.4393
mm|chr11:68785799-68785858	ref|NM_028048|ens|ENSMUST00000102606|gb|AK007453|gb|BC004569		A_52_P436447	NM_028048	ref|Mus musculus solute carrier family 25, member 35 (Slc25a35), mRNA [NM_028048]	Slc25a35	0.0713429	7.56275	1	0.251286	31.1738	3.52223	0.276562	19.7969	3.87652	0.316451	21.2659	4.43564
mm|chr1:158974266-158974325	gb|AK132966|riken|4930535E06		A_55_P1958981	AK132966	gb|Mus musculus adult male testis cDNA, RIKEN full-length enriched library, clone:4930535E06 product:hypothetical protein, full insert sequence. [AK132966]	Gm10531	0.0400844	4.24917	1	0.0351253	4.35755	0.876286	0.0490876	3.5138	1.22461	0.177724	11.9433	4.43376
mm|chr15:82160595-82160536	ref|NM_008669|ens|ENSMUST00000023088|gb|AK198447|gb|AF079458		A_51_P117130	NM_008669	ref|Mus musculus N-acetyl galactosaminidase, alpha (Naga), mRNA [NM_008669]	Naga	0.083276	8.82774	1	0.377566	46.8398	4.53391	0.405927	29.0572	4.87448	0.368906	24.7909	4.42991
mm|chr3:89151692-89151751	gb|AK132440|riken|4731419I09		A_55_P2388040	AK132440	gb|Mus musculus 10 days neonate skin cDNA, RIKEN full-length enriched library, clone:4731419I09 product:hypothetical protein, full insert sequence. [AK132440]	4731419I09Rik	0.0492636	5.22223	1	0.0424956	5.27188	0.862615	0.0587053	4.20226	1.19166	0.218228	14.6652	4.4298
mm|chr5:147542274-147542215			A_30_P01026187	chr5:147538052-147546377_R	lincRNA:chr5:147538052-147546377 reverse strand	chr5:147538052-147546377_R	0.0526692	5.58324	1	0.068966	8.55573	1.30942	0.0620753	4.44349	1.17859	0.23323	15.6733	4.42821
mm|chr10:6093414-6093473			A_30_P01017477	chr10:6081900-6105500_F	lincRNA:chr10:6081900-6105500 forward strand	chr10:6081900-6105500_F	0.0536868	5.6911	1	0.135008	16.7487	2.51474	0.220036	15.7507	4.09852	0.23773	15.9757	4.42809
mm|chr3:9430272-9430213	ref|NM_133218|ens|ENSMUST00000041124|gb|AF292939|tc|TC1630216		A_55_P2051139	NM_133218	ref|Mus musculus zinc finger protein 704 (Zfp704), mRNA [NM_133218]	Zfp704	0.046824	4.96361	1	0.0401523	4.98119	0.857515	0.0565573	4.0485	1.20787	0.207159	13.9213	4.4242
mm|chr10:86955161-86955102	ref|NM_008553|ens|ENSMUST00000020243|gb|AK141866|gb|M95603		A_51_P437327	NM_008553	ref|Mus musculus achaete-scute complex homolog 1 (Drosophila) (Ascl1), mRNA [NM_008553]	Ascl1	0.11408	12.0931	1	0.187362	23.2436	1.64238	0.437705	31.3319	3.83684	0.504544	33.9059	4.42273
mm|chr7:5147379-5147320	ref|NM_030740|ens|ENSMUST00000169556|gb|BC160280|gb|AF324868		A_66_P123209	NM_030740	ref|Mus musculus vomeronasal 1 receptor 56 (Vmn1r56), mRNA [NM_030740]	Vmn1r56	0.0520798	5.52076	1	0.0958779	11.8943	1.84098	0.146289	10.4717	2.80893	0.23015	15.4663	4.41917
mm|chr6:130039041-130038982			A_55_P2022332	A_55_P2022332	Unknown	A_55_P2022332	0.0395902	4.19679	1	0.0344322	4.27157	0.869715	0.0627218	4.48977	1.58427	0.174886	11.7525	4.4174
mm|chr6:28165232-28165291			A_30_P01017791	chr6:28164118-28165468_F	lincRNA:chr6:28164118-28165468 forward strand	chr6:28164118-28165468_F	0.0521115	5.52411	1	0.045704	5.66992	0.877044	0.0651185	4.66133	1.2496	0.230186	15.4687	4.41718
mm|chr3:95500700-95500759			A_30_P01023209	chr3:95500407-95500904_F	lincRNA:chr3:95500407-95500904 forward strand	chr3:95500407-95500904_F	0.119616	12.68	1	0.230275	28.5673	1.92512	0.353862	25.3302	2.95832	0.528356	35.5061	4.4171
mm|chr8:82837142-82837083			A_30_P01022866	chr8:82836971-82849309_R	lincRNA:chr8:82836971-82849309 reverse strand	chr8:82836971-82849309_R	0.0599781	6.35801	1	0.0381473	4.73246	0.636022	0.15359	10.9943	2.56078	0.264591	17.7808	4.41146
mm|chr2:25256752-25256811	ref|NM_009849|ens|ENSMUST00000114287|ens|ENSMUST00000148859|ens|ENSMUST00000028328		A_55_P1974645	NM_009849	ref|Mus musculus ectonucleoside triphosphate diphosphohydrolase 2 (Entpd2), mRNA [NM_009849]	Entpd2	0.25421	26.9477	1	0.18151	22.5176	0.714017	0.733045	52.473	2.88362	1.12109	75.3386	4.41011
mm|chr3:36341621-36341680			A_30_P01030998	chr3:36280098-36347798_F	lincRNA:chr3:36280098-36347798 forward strand	chr3:36280098-36347798_F	0.0549206	5.8219	1	0.0514095	6.37772	0.936068	0.108275	7.75058	1.97149	0.242146	16.2725	4.40902
mm|chr11:120095674-120095615			A_30_P01025993	chr11:120094176-120097622_R	lincRNA:chr11:120094176-120097622 reverse strand	chr11:120094176-120097622_R	0.0436156	4.6235	1	0.0375714	4.661	0.861421	0.051406	3.67976	1.17861	0.192209	12.9167	4.40688
mm|chr19:9158256-9158197	ref|NM_011681|ens|ENSMUST00000025554|gb|X67702|gb|AK145844		A_51_P128575	NM_011681	ref|Mus musculus secretoglobin, family 1A, member 1 (uteroglobin) (Scgb1a1), mRNA [NM_011681]	Scgb1a1	0.118503	12.562	1	0.118717	14.7277	1.0018	0.0745042	5.33317	0.628709	0.52199	35.0783	4.40486
mm|chr9:56352693-56352634	gb|AK047684|riken|C030010J02|nap|NAP076872-1		A_55_P2048975	AK047684	gb|Mus musculus adult male corpus striatum cDNA, RIKEN full-length enriched library, clone:C030010J02 product:unclassifiable, full insert sequence. [AK047684]	AK047684	0.0787685	8.34991	1	0.11579	14.3646	1.47	0.222019	15.8926	2.81863	0.346864	23.3096	4.40359
mm|chr6:40845394-40845335	ref|NM_175020|ens|ENSMUST00000063523|gb|AK075754|gb|BC048599		A_51_P100537	NM_175020	ref|Mus musculus protease, serine 58 (Prss58), mRNA [NM_175020]	Prss58	0.0529462	5.6126	1	0.0459969	5.70625	0.868748	0.0654877	4.68775	1.23687	0.233122	15.666	4.40299
mm|chr12:85771894-85771835	ref|NM_134042|ens|ENSMUST00000166796|ens|ENSMUST00000085192|gb|AK033587		A_51_P338485	NM_134042	ref|Mus musculus aldehyde dehydrogenase family 6, subfamily A1 (Aldh6a1), nuclear gene encoding mitochondrial protein, mRNA [NM_134042]	Aldh6a1	1.26121	133.696	1	2.21827	275.193	1.75884	5.06426	362.511	4.01539	5.55212	373.108	4.4022
mm|chr2:173039366-173039307	ref|NM_001139519|gb|AK008179|ens|ENSMUST00000109116|tc|TC1588136		A_55_P1994042	NM_001139519	ref|Mus musculus Z-DNA binding protein 1 (Zbp1), transcript variant 2, mRNA [NM_001139519]	Zbp1	1.16922	123.944	1	0.646083	80.1514	0.552576	6.59833	472.323	5.64336	5.14685	345.874	4.40195
mm|chr17:86568035-86568094	ref|NM_011104|ens|ENSMUST00000142003|ens|ENSMUST00000097274|ens|ENSMUST00000097275		A_55_P2007944	NM_011104	ref|Mus musculus protein kinase C, epsilon (Prkce), mRNA [NM_011104]	Prkce	0.178563	18.9287	1	0.0955525	11.854	0.535119	0.256624	18.3698	1.43716	0.78513	52.7616	4.39693
mm|chr11:60579948-60579889	gb|AK137725|riken|9930117E08		A_55_P2168256	AK137725	gb|Mus musculus adult female vagina cDNA, RIKEN full-length enriched library, clone:9930117E08 product:unclassifiable, full insert sequence. [AK137725]	Gm3881	0.0507524	5.38004	1	0.0447352	5.54972	0.881439	0.0969386	6.93908	1.91003	0.223133	14.9948	4.39651
mm|chr15:82388259-82388501	ref|NM_201360|ens|ENSMUST00000014525|ens|ENSMUST00000068861|gb|BC139169		A_51_P386270	NM_201360	ref|Mus musculus cytochrome P450, family 2, subfamily d, polypeptide 12 (Cyp2d12), mRNA [NM_201360]	Cyp2d12	0.062241	6.5979	1	0.0464189	5.7586	0.745793	0.204957	14.6713	3.29296	0.273636	18.3886	4.3964
mm|chr1:135611735-135611676	ref|NM_213616|ref|NM_001167949|ens|ENSMUST00000048953|ens|ENSMUST00000165602		A_55_P1985268	NM_213616	ref|Mus musculus ATPase, Ca++ transporting, plasma membrane 4 (Atp2b4), transcript variant b, mRNA [NM_213616]	Atp2b4	0.0561744	5.95481	1	0.0482373	5.98418	0.858705	0.0658119	4.71096	1.17156	0.246909	16.5925	4.3954
mm|chr7:39227915-39227974	gb|AK076675|gb|AK005849|riken|4930412B11|riken|1700010N08		A_52_P355064	AK076675	gb|Mus musculus adult male testis cDNA, RIKEN full-length enriched library, clone:4930412B11 product:unclassifiable, full insert sequence. [AK076675]	1700010N08Rik	0.0415774	4.40744	1	0.0361333	4.4826	0.869062	0.0514671	3.68413	1.23786	0.182695	12.2773	4.39409
mm|chr15:75102462-75102522	ref|NM_008530|ens|ENSMUST00000023247|tc|TC1594232|tc|TC1780872		A_51_P517695	NM_008530	ref|Mus musculus lymphocyte antigen 6 complex, locus F (Ly6f), mRNA [NM_008530]	Ly6f	0.4287	45.4446	1	1.2613	156.474	2.94216	2.10669	150.802	4.91414	1.88353	126.575	4.39359
mm|chr2:180750502-180750561	ref|NM_028518|ens|ENSMUST00000108856|gb|AK006759|gb|BC030415		A_55_P2107731	NM_028518	ref|Mus musculus collagen, type XX, alpha 1 (Col20a1), mRNA [NM_028518]	Col20a1	0.0700074	7.42118	1	0.0522544	6.48253	0.746412	0.231252	16.5535	3.30325	0.307568	20.6689	4.39336
mm|chr1:92180307-92180366			A_30_P01022788	chr1:92177032-92180487_F	lincRNA:chr1:92177032-92180487 forward strand	chr1:92177032-92180487_F	0.0722276	7.65654	1	0.099841	12.386	1.38231	0.219581	15.7181	3.04013	0.317256	21.32	4.39245
mm|chr4:25127116-25127057	ref|NM_021318|ens|ENSMUST00000108204|ens|ENSMUST00000029922|gb|AF083394		A_55_P2036605	NM_021318	ref|Mus musculus four and a half LIM domains 5 (Fhl5), mRNA [NM_021318]	Fhl5	0.0792723	8.40332	1	0.109617	13.5988	1.3828	0.29062	20.8032	3.6661	0.347884	23.3782	4.38847
mm|chr7:30700559-30700618	ref|NM_001243908|ens|ENSMUST00000085789|gb|BC064456|gb|AK155472		A_55_P2059936	NM_001243908	ref|Mus musculus zinc finger protein 383 (Zfp383), mRNA [NM_001243908]	Zfp383	0.0674401	7.14903	1	0.105527	13.0913	1.56475	0.233306	16.7005	3.45945	0.295953	19.8883	4.38838
mm|chr8:112099104-112099045	ref|NM_017370|ens|ENSMUST00000074898|gb|AK150430|gb|AK150830		A_55_P2048607	NM_017370	ref|Mus musculus haptoglobin (Hp), mRNA [NM_017370]	Hp	6.87644	728.942	1	0.785629	97.463	0.114249	19.1938	1373.93	2.79124	30.1727	2027.64	4.38783
mm|chrX:100005206-100005265	ref|NM_001142690|ref|NM_001142691|gb|AK016891|ens|ENSMUST00000118218		A_55_P2006375	NM_001142690	ref|Mus musculus DMRT-like family C1c2 (Dmrtc1c2), mRNA [NM_001142690]	Dmrtc1c2	0.0511197	5.41898	1	0.044538	5.52527	0.87125	0.0599494	4.29131	1.17273	0.224286	15.0723	4.38747
mm|chr4:128609463-128609404	ref|NM_172875|ens|ENSMUST00000030581|ens|ENSMUST00000106068|gb|AK077201		A_66_P140742	NM_172875	ref|Mus musculus arginine decarboxylase (Adc), mRNA [NM_172875]	Adc	1.23955	131.4	1	2.30415	285.846	1.85885	6.02629	431.375	4.86165	5.43647	365.337	4.38583
mm|chr12:113365695-113365754	ref|NM_001081169|ens|ENSMUST00000079400|gb|AK080031|gb|BC089617		A_52_P338956	NM_001081169	ref|Mus musculus asparaginase homolog (S. cerevisiae) (Aspg), mRNA [NM_001081169]	Aspg	0.0453464	4.80697	1	0.131767	16.3467	2.90579	0.211951	15.172	4.67406	0.19886	13.3636	4.38536
mm|chr9:27154073-27154014			A_30_P01032716	chr9:27148989-27155714_R	lincRNA:chr9:27148989-27155714 reverse strand	chr9:27148989-27155714_R	0.0516443	5.47459	1	0.044512	5.52204	0.861896	0.0665567	4.76428	1.28875	0.226444	15.2173	4.38469
mm|chr4:8610320-8610261			A_30_P01019596	chr4:8606650-8614031_R	lincRNA:chr4:8606650-8614031 reverse strand	chr4:8606650-8614031_R	0.0506046	5.36438	1	0.0442965	5.4953	0.875344	0.207752	14.8714	4.1054	0.22186	14.9093	4.38419
mm|chr6:29240613-29240672	ref|NM_001101486|ens|ENSMUST00000167608|ens|ENSMUST00000115286|gb|BC089565		A_55_P2125613	NM_001101486	ref|Mus musculus family with sequence similarity 71, member F2 (Fam71f2), mRNA [NM_001101486]	Fam71f2	0.0493845	5.23504	1	0.144892	17.9749	2.93396	0.150811	10.7954	3.0538	0.216491	14.5484	4.38378
mm|chr7:18267342-18267401	ref|NR_002857|ens|ENSMUST00000165490|gb|AK132281|riken|3830422G10		A_55_P2009360	NR_002857	ref|Mus musculus pregnancy specific glycoprotein pseudogene 1 (Psg-ps1), non-coding RNA [NR_002857]	Psg-ps1	0.0550266	5.83313	1	0.0382616	4.74664	0.69533	0.169754	12.1514	3.08495	0.24118	16.2076	4.38298
mm|chr14:21040435-21040494			A_30_P01028586	chr14:21029450-21049451_F	lincRNA:chr14:21029450-21049451 forward strand	chr14:21029450-21049451_F	0.0519538	5.5074	1	0.0455689	5.65315	0.877104	0.0648613	4.64292	1.24844	0.227682	15.3004	4.38238
mm|chr1:36622399-36622458	gb|AK052542|tc|TC1629400|riken|D430047J20|nap|NAP086593-1		A_55_P2222437	AK052542	gb|Mus musculus 13 days embryo lung cDNA, RIKEN full-length enriched library, clone:D430047J20 product:unclassifiable, full insert sequence. [AK052542]	D430040D24Rik	0.0537621	5.69909	1	0.132184	16.3984	2.45869	0.128249	9.18033	2.38549	0.23542	15.8205	4.37892
mm|chr4:106807163-106807104	ref|NM_025617|ens|ENSMUST00000057043|gb|AK018110|tc|TC1587514		A_51_P114456	NM_025617	ref|Mus musculus RIKEN cDNA 2210012G02 gene (2210012G02Rik), mRNA [NM_025617]	2210012G02Rik	0.0397335	4.21198	1	0.086709	10.7569	2.18226	0.0701226	5.01954	1.76482	0.173761	11.6769	4.37316
mm|chr2:115900741-115900800			A_30_P01031970	chr2:115900355-115900904_F	lincRNA:chr2:115900355-115900904 forward strand	chr2:115900355-115900904_F	0.0483772	5.12826	1	0.117404	14.5648	2.42684	0.0603697	4.3214	1.2479	0.211327	14.2014	4.36832
mm|chr16:29809542-29809483	gb|AK031769|tc|TC1604022|riken|6230416H20|nap|NAP120569-001		A_55_P2249095	AK031769	gb|Mus musculus 11 days embryo head cDNA, RIKEN full-length enriched library, clone:6230416H20 product:weakly similar to 2810428J06RIK PROTEIN [Mus musculus], full insert sequence. [AK031769]	9530020O07Rik	0.0510493	5.41152	1	0.0444785	5.51789	0.871286	0.0598619	4.28505	1.17263	0.222963	14.9834	4.36761
mm|chr11:99144053-99143994	ref|NM_029393|ens|ENSMUST00000017255|gb|AK053678|gb|GU046702		A_66_P104945	NM_029393	ref|Mus musculus keratin 24 (Krt24), mRNA [NM_029393]	Krt24	0.0399476	4.23468	1	0.0346745	4.30162	0.867998	0.0481682	3.44799	1.20578	0.174444	11.7228	4.36682
mm|chr14:77053214-77053155			A_30_P01029315	chr14:77006215-77063293_R	lincRNA:chr14:77006215-77063293 reverse strand	chr14:77006215-77063293_R	0.0851312	9.02439	1	0.132334	16.417	1.55447	0.109549	7.84177	1.28683	0.371724	24.9803	4.36649
mm|chr4:119040391-119040332	ens|ENSMUST00000170059|ens|ENSMUST00000152879|ens|ENSMUST00000127149|ref|XM_003084594		A_51_P321600	ENSMUST00000170059	ens|coiled-coil domain containing 30 [Source:MGI Symbol;Acc:MGI:1920582] [ENSMUST00000170059]	ENSMUST00000170059	0.0395716	4.19482	1	0.0769693	9.5486	1.94506	0.048134	3.44554	1.21638	0.172675	11.6039	4.3636
mm|chr13:16949757-16949698	ref|NM_138654|ens|ENSMUST00000068545|gb|AK160265|gb|BC055852		A_52_P29743	NM_138654	ref|Mus musculus RIKEN cDNA 5033411D12 gene (5033411D12Rik), mRNA [NM_138654]	5033411D12Rik	0.055761	5.91099	1	0.0478698	5.9386	0.858482	0.189569	13.5698	3.39967	0.243211	16.3441	4.36167
mm|chr1:93258755-93258814	ref|NM_027551|ens|ENSMUST00000027533|gb|AK086025|gb|AK014532		A_51_P205215	NM_027551	ref|Mus musculus kelch-like 30 (Drosophila) (Klhl30), mRNA [NM_027551]	Klhl30	0.307701	32.6181	1	0.696761	86.4383	2.26441	1.0243	73.3214	3.32887	1.34045	90.0795	4.35633
mm|chr5:44175890-44175949			A_30_P01028177	chr5:44173484-44176009_F	lincRNA:chr5:44173484-44176009 forward strand	chr5:44173484-44176009_F	0.0435257	4.61397	1	0.045658	5.66421	1.04899	0.0543337	3.88933	1.24831	0.189603	12.7415	4.35612
mm|chr13:97698282-97698341			A_30_P01032389	chr13:97697927-97698400_F	lincRNA:chr13:97697927-97698400 forward strand	chr13:97697927-97698400_F	0.0539323	5.71714	1	0.0608193	7.54507	1.1277	0.0668123	4.78258	1.23882	0.234913	15.7864	4.35569
mm|chr7:132326092-132326151			A_30_P01019581	chr7:132218864-132329172_F	lincRNA:chr7:132218864-132329172 forward strand	chr7:132218864-132329172_F	0.0427463	4.53136	1	0.0380171	4.71629	0.889364	0.0531632	3.80554	1.24369	0.186155	12.5098	4.35487
mm|chr17:26614119-26614178			A_30_P01030854	chr17:26613904-26614277_F	lincRNA:chr17:26613904-26614277 forward strand	chr17:26613904-26614277_F	0.0459259	4.86841	1	0.0403399	5.00446	0.87837	0.055024	3.93874	1.1981	0.199975	13.4385	4.35429
mm|chr8:73121065-73121124	ref|NM_023627|ens|ENSMUST00000019283|gb|AK005029|gb|AK079323		A_51_P228658	NM_023627	ref|Mus musculus myo-inositol 1-phosphate synthase A1 (Isyna1), mRNA [NM_023627]	Isyna1	5.70682	604.955	1	6.86157	851.227	1.20235	24.4079	1747.17	4.27697	24.8408	1669.33	4.35283
unmapped			A_55_P2011275	A_55_P2011275	Unknown	A_55_P2011275	0.0518962	5.5013	1	0.0451437	5.60041	0.869884	0.0623383	4.46232	1.20121	0.225847	15.1772	4.3519
mm|chr7:10859819-10859760	ref|NM_134230|ens|ENSMUST00000060374|gb|BC109341|gb|BC109342		A_51_P203277	NM_134230	ref|Mus musculus vomeronasal 1 receptor 66 (Vmn1r66), mRNA [NM_134230]	Vmn1r66	0.0425457	4.51009	1	0.0368193	4.5677	0.865405	0.11117	7.95783	2.61296	0.185148	12.4422	4.35175
mm|chr15:028555236-028555177			A_55_P2184385	A_55_P2184385	Unknown	A_55_P2184385	0.0450632	4.77696	1	0.0703752	8.73055	1.5617	0.0564204	4.0387	1.25203	0.196103	13.1783	4.35173
mm|chrX:141122765-141122824			A_55_P2101402	A_55_P2101402	Unknown	A_55_P2101402	0.0464002	4.91868	1	0.0504999	6.26488	1.08836	0.0572685	4.09941	1.23423	0.201873	13.5661	4.35069
mm|chr6:129182930-129182989			A_30_P01020339	chr6:129151512-129208737_F	lincRNA:chr6:129151512-129208737 forward strand	chr6:129151512-129208737_F	0.0429457	4.55249	1	0.291964	36.2203	6.79844	0.0535341	3.83209	1.24655	0.186733	12.5486	4.3481
mm|chr13:62771525-62771466			A_30_P01030253	chr13:62771112-62786278_R	lincRNA:chr13:62771112-62786278 reverse strand	chr13:62771112-62786278_R	0.0478597	5.0734	1	0.055028	6.82662	1.14978	0.0558035	3.99454	1.16598	0.207947	13.9743	4.34493
mm|chr14:33972148-33972207			A_30_P01027284	chr14:33923944-34003394_F	lincRNA:chr14:33923944-34003394 forward strand	chr14:33923944-34003394_F	0.0886712	9.39965	1	0.188359	23.3673	2.12424	0.187041	13.3888	2.10938	0.385198	25.8857	4.34411
mm|chr10:66881482-66881541			A_30_P01032604	chr10:66760153-66881675_F	lincRNA:chr10:66760153-66881675 forward strand	chr10:66760153-66881675_F	0.0508632	5.3918	1	0.0444369	5.51272	0.873654	0.123146	8.81508	2.42112	0.220929	14.8467	4.3436
mm|chrX:7994042-7994576	ref|NM_026492|ref|NM_001205108|ref|NM_001081565|ref|NM_001081564		A_51_P452890	NM_026492	ref|Mus musculus synovial sarcoma, X member B, breakpoint 1 (Ssxb1), mRNA [NM_026492]	Ssxb1	0.0502401	5.32573	1	0.0440742	5.46772	0.877271	0.0632021	4.52415	1.258	0.218209	14.6639	4.34333
mm|chr4:151536406-151536465	ref|NM_008236|ens|ENSMUST00000030782|gb|AK053792|tc|TC1590569		A_52_P263658	NM_008236	ref|Mus musculus hairy and enhancer of split 2 (Drosophila) (Hes2), mRNA [NM_008236]	Hes2	0.140347	14.8775	1	0.173954	21.5802	1.23946	0.199506	14.2811	1.42152	0.609282	40.9444	4.34127
mm|chr15:83188510-83188569			A_30_P01022912	chr15:83181291-83197750_F	lincRNA:chr15:83181291-83197750 forward strand	chr15:83181291-83197750_F	0.0680624	7.21501	1	0.0479168	5.94443	0.704012	0.146403	10.4799	2.15101	0.295427	19.853	4.34052
mm|chr17:26909228-26909287	ref|NM_029870|ens|ENSMUST00000062519|gb|AK030092|gb|AK164174		A_52_P573290	NM_029870	ref|Mus musculus RIKEN cDNA A930001N09 gene (A930001N09Rik), mRNA [NM_029870]	A930001N09Rik	0.0460354	4.88002	1	0.0395592	4.90761	0.859322	0.0550008	3.93708	1.19475	0.199795	13.4264	4.34002
mm|chr15:95965484-95965425			A_30_P01030245	chr15:95965249-96114921_R	lincRNA:chr15:95965249-96114921 reverse strand	chr15:95965249-96114921_R	0.0547338	5.80209	1	0.0468462	5.81161	0.855892	0.0641291	4.5905	1.17165	0.237534	15.9626	4.33981
mm|chr2:173115959-173115900			A_30_P01017521	chr2:173115795-173116608_R	lincRNA:chr2:173115795-173116608 reverse strand	chr2:173115795-173116608_R	0.0408712	4.33258	1	0.0622129	7.71797	1.52217	0.0505041	3.6152	1.23569	0.177368	11.9193	4.33968
mm|chr14:053340363-053340422			A_55_P2183318	A_55_P2183318	Unknown	A_55_P2183318	0.0511947	5.42693	1	0.0664678	8.24582	1.29834	0.0862273	6.17234	1.6843	0.222167	14.9299	4.33965
mm|chr16:9259516-9259457			A_30_P01025152	chr16:9249688-9275013_R	lincRNA:chr16:9249688-9275013 reverse strand	chr16:9249688-9275013_R	0.0514578	5.45482	1	0.0451372	5.59961	0.87717	0.0644806	4.61567	1.25308	0.223275	15.0043	4.33899
mm|chr16:64924642-64924583	ref|NM_008310|ens|ENSMUST00000063076|gb|AK045364|tc|TC1589072		A_55_P2019422	NM_008310	ref|Mus musculus 5-hydroxytryptamine (serotonin) receptor 1F (Htr1f), mRNA [NM_008310]	Htr1f	0.0438794	4.65146	1	0.037787	4.68775	0.861157	0.0519695	3.72009	1.18437	0.190204	12.7819	4.33471
mm|chr3:96468383-96468442	ref|NM_001081053|ens|ENSMUST00000029744|tc|TC1611587		A_55_P2097913	NM_001081053	ref|Mus musculus integrin, alpha 10 (Itga10), mRNA [NM_001081053]	Itga10	0.561734	59.547	1	0.726228	90.0938	1.29283	1.91906	137.371	3.41632	2.43464	163.61	4.33415
mm|chr2:92873506-92873565	gb|AK028444|gb|BC100298|tc|TC1590961|tc|TC1595475		A_66_P130759	AK028444	gb|Mus musculus 0 day neonate skin cDNA, RIKEN full-length enriched library, clone:4631405J19 product:hypothetical protein, full insert sequence. [AK028444]	4631405J19Rik	0.0424857	4.50373	1	0.0375249	4.65524	0.883236	0.0525929	3.76471	1.2379	0.183974	12.3633	4.33026
mm|chr12:114659689-114659630	ens|ENSMUST00000103426|gb|AK088666|gb|AF052834|gb|AF052835		A_51_P485421	ENSMUST00000103426	ens|immunoglobulin heavy constant mu [Source:MGI Symbol;Acc:MGI:96448] [ENSMUST00000103426]	ENSMUST00000103426	0.0496876	5.26717	1	0.0435825	5.40673	0.877131	0.0625595	4.47815	1.25906	0.21509	14.4543	4.32885
mm|chr17:7965338-7965279	ref|NM_001081416|ens|ENSMUST00000097425|ref|XM_001472246|gb|AK220427		A_55_P1989519	NM_001081416	ref|Mus musculus fibronectin type III domain containing 1 (Fndc1), mRNA [NM_001081416]	Fndc1	0.0464748	4.92659	1	0.0398307	4.94129	0.857039	0.0553218	3.96006	1.19036	0.201045	13.5104	4.32589
mm|chr1:173258818-173258877			A_30_P01030219	chr1:173250734-173259306_F	lincRNA:chr1:173250734-173259306 forward strand	chr1:173250734-173259306_F	0.04645	4.92397	1	0.0761505	9.44703	1.63941	0.121413	8.69099	2.61383	0.200924	13.5023	4.32559
mm|chr15:75931971-75931912	gb|BC026387|nap|NAP025393-001		A_66_P110161	BC026387	gb|Mus musculus epiplakin 1, mRNA (cDNA clone IMAGE:4188338), partial cds. [BC026387]	Eppk1	0.045735	4.84817	1	0.0613807	7.61472	1.34209	0.103675	7.42127	2.26686	0.197629	13.2809	4.32117
mm|chr3:107729256-107729218	ref|NM_026672|ens|ENSMUST00000004137|gb|AK002213|gb|AK162441		A_51_P114005	NM_026672	ref|Mus musculus glutathione S-transferase, mu 7 (Gstm7), mRNA [NM_026672]	Gstm7	0.0476112	5.04706	1	0.0535869	6.64784	1.12551	0.187773	13.4412	3.94388	0.205579	13.8152	4.31788
mm|chr13:28551962-28551903			A_30_P01018833	chr13:28551902-28975446_R	lincRNA:chr13:28551902-28975446 reverse strand	chr13:28551902-28975446_R	0.0476714	5.05344	1	0.0423587	5.25491	0.888556	0.0586771	4.20024	1.23087	0.205779	13.8286	4.31661
mm|chr1:72206107-72206048	ref|NM_001005423|ens|ENSMUST00000048860|gb|BC068125|gb|AY628210		A_55_P2096917	NM_001005423	ref|Mus musculus melanoregulin (Mreg), mRNA [NM_001005423]	Mreg	0.0858122	9.09659	1	0.0882001	10.9419	1.02783	0.17207	12.3172	2.00519	0.370398	24.8912	4.31638
mm|chr4:111702084-111702143	ref|NM_001102662|ens|ENSMUST00000162158|gb|EF494889|gb|EF494890		A_55_P2025785	NM_001102662	ref|Mus musculus selection and upkeep of intraepithelial T cells 1 (Skint1), mRNA [NM_001102662]	Skint1	0.0497261	5.27125	1	0.0435848	5.40701	0.876497	0.0619587	4.43514	1.246	0.214632	14.4235	4.31629
mm|chr1:159402423-159402482	ref|NM_001033284|ens|ENSMUST00000046743|gb|AK143913|gb|BC057972		A_52_P559557	NM_001033284	ref|Mus musculus cDNA sequence BC026585 (BC026585), mRNA [NM_001033284]	BC026585	0.133471	14.1487	1	0.236164	29.2979	1.76941	0.573312	41.039	4.29541	0.576053	38.7114	4.31595
mm|chr8:129106603-129106662			A_30_P01024476	chr8:129102060-129109035_F	lincRNA:chr8:129102060-129109035 forward strand	chr8:129102060-129109035_F	0.0658708	6.98268	1	0.0380523	4.72067	0.577682	0.138911	9.94354	2.10884	0.28422	19.0999	4.31481
mm|chr8:49862797-49862856			A_30_P01019939	chr8:49853937-49874087_F	lincRNA:chr8:49853937-49874087 forward strand	chr8:49853937-49874087_F	0.0535332	5.67482	1	0.0921116	11.4271	1.72065	0.0638472	4.57033	1.19267	0.230776	15.5084	4.31089
mm|chr1:15837960-15838019			A_30_P01020876	chr1:15837503-15838648_F	lincRNA:chr1:15837503-15838648 forward strand	chr1:15837503-15838648_F	0.0491019	5.20508	1	0.0424594	5.2674	0.86472	0.0587384	4.20462	1.19626	0.211654	14.2234	4.3105
mm|chr8:34675603-34675662			A_30_P01022320	chr8:34646787-34680312_F	lincRNA:chr8:34646787-34680312 forward strand	chr8:34646787-34680312_F	0.0970408	10.2869	1	0.0399874	4.96073	0.412068	0.0567487	4.0622	0.584792	0.418279	28.1088	4.31034
mm|chr17:26913319-26913378			A_30_P01024656	chr17:26911397-26917047_F	lincRNA:chr17:26911397-26917047 forward strand	chr17:26911397-26917047_F	0.33421	35.4281	1	0.89048	110.471	2.66444	1.36317	97.5786	4.07878	1.44055	96.8066	4.31032
mm|chr1:138622450-138622509			A_30_P01032405	chr1:138592780-138622719_F	lincRNA:chr1:138592780-138622719 forward strand	chr1:138592780-138622719_F	0.0427522	4.53198	1	0.0698219	8.66192	1.63318	0.145573	10.4205	3.40505	0.184087	12.3708	4.3059
mm|chr9:113651825-113651766			A_30_P01024062	chr9:113648970-113715170_R	lincRNA:chr9:113648970-113715170 reverse strand	chr9:113648970-113715170_R	0.0485621	5.14787	1	0.101751	12.623	2.09528	0.0803828	5.75398	1.65526	0.20909	14.0511	4.30562
mm|chr2:181027518-181027459			A_30_P01033497	chr2:181024098-181039073_R	lincRNA:chr2:181024098-181039073 reverse strand	chr2:181024098-181039073_R	0.0518213	5.49335	1	0.045451	5.63852	0.877072	0.0647973	4.63834	1.2504	0.223037	14.9883	4.30397
mm|chr5:151300133-151300192	ref|NM_172887|ens|ENSMUST00000052630|ens|ENSMUST00000087204|gb|AK041177		A_55_P2029682	NM_172887	ref|Mus musculus furry homolog (Drosophila) (Fry), mRNA [NM_172887]	Fry	0.0526848	5.58489	1	0.0981386	12.1748	1.86275	0.380248	27.219	7.21743	0.226624	15.2294	4.3015
mm|chr19:8928234-8928292	ref|NM_001013019|ens|ENSMUST00000096257|gb|AK004394|gb|AK158268		A_52_P453374	NM_001013019	ref|Mus musculus LRRN4 C-terminal like (Lrrn4cl), mRNA [NM_001013019]	Lrrn4cl	6.99116	741.103	1	18.0215	2235.7	2.57775	25.9106	1854.74	3.7062	30.0714	2020.83	4.30135
mm|chr14:63225391-63225450	ref|NM_001243857|ens|ENSMUST00000166454|ens|ENSMUST00000039064|nap|NAP017695-001		A_66_P101724	NM_001243857	ref|Mus musculus family with sequence similarity 124, member A (Fam124a), mRNA [NM_001243857]	Fam124a	0.169117	17.9273	1	0.752302	93.3286	4.44843	0.974935	69.7881	5.76487	0.72708	48.8606	4.29929
mm|chr10:117642873-117642932	ref|NM_016971|ref|NM_054079|ens|ENSMUST00000096691|ens|ENSMUST00000163808		A_55_P2199202	NM_016971	ref|Mus musculus interleukin 22 (Il22), mRNA [NM_016971]	Il22	0.0476413	5.05025	1	0.0417461	5.1789	0.876258	0.0638191	4.56832	1.33958	0.204788	13.762	4.29854
mm|chr5:148446931-148446872	ens|ENSMUST00000110529		A_55_P2166282	ENSMUST00000110529	ens|FMS-like tyrosine kinase 1 [Source:MGI Symbol;Acc:MGI:95558] [ENSMUST00000110529]	Flt1	0.0520263	5.51509	1	0.119108	14.7762	2.28938	0.116915	8.36906	2.24724	0.223628	15.0281	4.29837
mm|chr4:128234998-128234939			A_30_P01033535	chr4:128207615-128242898_R	lincRNA:chr4:128207615-128242898 reverse strand	chr4:128207615-128242898_R	0.0580482	6.15344	1	0.0846732	10.5043	1.45867	0.0674576	4.82876	1.1621	0.249383	16.7588	4.29613
mm|chr3:48907105-48907046			A_30_P01018754	chr3:48906985-48957532_R	lincRNA:chr3:48906985-48957532 reverse strand	chr3:48906985-48957532_R	0.0492652	5.22239	1	0.0431423	5.35211	0.875715	0.0610334	4.36891	1.23887	0.211646	14.2229	4.29606
mm|chr13:27948312-27948371	ref|NM_001045532|ens|ENSMUST00000099658|ens|ENSMUST00000054932|ens|ENSMUST00000079228		A_55_P2183208	NM_001045532	ref|Mus musculus Prolactin family 2, subfamily c, member 1 (Prl2c1), mRNA [NM_001045532]	Prl2c1	8.45434	896.208	1	74.8503	9285.73	8.85348	29.0245	2077.64	3.43308	36.3156	2440.45	4.2955
mm|chr1:90508741-90508682			A_30_P01024714	chr1:90508551-90508788_R	lincRNA:chr1:90508551-90508788 reverse strand	chr1:90508551-90508788_R	0.0990081	10.4954	1	0.157529	19.5427	1.59108	0.054533	3.9036	0.550794	0.425202	28.574	4.29461
mm|chr10:021482774-021482715			A_55_P1958092	A_55_P1958092	Unknown	A_55_P1958092	0.0485729	5.149	1	0.0984734	12.2163	2.02733	0.0573497	4.10522	1.18069	0.208572	14.0162	4.29399
mm|chr6:30460231-30460290	ref|NM_027073|gb|AK006038|gb|BC049755|ens|ENSMUST00000031797		A_55_P2126567	NM_027073	ref|Mus musculus RIKEN cDNA 1700025E21 gene (1700025E21Rik), transcript variant 1, mRNA [NM_027073]	1700025E21Rik	0.0459899	4.87519	1	0.121855	15.117	2.6496	0.185661	13.2901	4.037	0.197306	13.2592	4.2902
mm|chr17:56982586-56982527	ref|NM_001039114|ens|ENSMUST00000112954|ens|ENSMUST00000043062|gb|DQ250679		A_55_P1993723	NM_001039114	ref|Mus musculus acyl-CoA synthetase bubblegum family member 2 (Acsbg2), mRNA [NM_001039114]	Acsbg2	0.048136	5.1027	1	0.0413615	5.13119	0.859262	0.132682	9.4977	2.7564	0.206477	13.8755	4.28945
mm|chr11:96115040-96114981			A_30_P01019010	chr11:96111499-96126224_R	lincRNA:chr11:96111499-96126224 reverse strand	chr11:96111499-96126224_R	10.5952	1123.15	1	14.9084	1849.5	1.4071	36.1074	2584.65	3.40792	45.4412	3053.7	4.28886
mm|chr16:23157576-23157635	ref|NM_009605|ens|ENSMUST00000023593|gb|AY749429|gb|AY754346		A_51_P458451	NM_009605	ref|Mus musculus adiponectin, C1Q and collagen domain containing (Adipoq), mRNA [NM_009605]	Adipoq	0.0601508	6.37633	1	0.0704524	8.74013	1.17126	0.063037	4.51233	1.04798	0.257948	17.3344	4.28835
mm|chr1:166079660-166079719	ref|NM_011347|ens|ENSMUST00000086043|ens|ENSMUST00000161020|ens|ENSMUST00000162746		A_51_P211854	NM_011347	ref|Mus musculus selectin, platelet (Selp), mRNA [NM_011347]	Selp	0.340087	36.0512	1	1.11738	138.619	3.28557	1.30649	93.5212	3.84162	1.4584	98.0059	4.2883
mm|chr1:71632175-71632116	ref|NM_010233|ens|ENSMUST00000097700|ens|ENSMUST00000087254|ens|ENSMUST00000055226		A_55_P2130178	NM_010233	ref|Mus musculus fibronectin 1 (Fn1), mRNA [NM_010233]	Fn1	191.781	20329.8	1	296.164	36741.3	1.54429	748.388	53571.3	3.90231	822.346	55262.6	4.28795
mm|chr17:56240114-56240055	ref|NM_020568|ens|ENSMUST00000002908|gb|AK173286|gb|AK139012		A_51_P495780	NM_020568	ref|Mus musculus perilipin 4 (Plin4), mRNA [NM_020568]	Plin4	3.10084	328.707	1	16.2857	2020.36	5.25202	11.767	842.308	3.79477	13.2937	893.354	4.28713
mm|chr11:006131210-006131151			A_55_P2154119	A_55_P2154119	Unknown	A_55_P2154119	0.0396191	4.19985	1	0.0345282	4.28347	0.871503	0.0482827	3.45618	1.21867	0.169851	11.4141	4.28709
mm|chr1:87409439-87409498			A_30_P01024184	chr1:87348082-87409907_F	lincRNA:chr1:87348082-87409907 forward strand	chr1:87348082-87409907_F	0.0514041	5.44913	1	0.1247	15.4699	2.42587	0.156292	11.1877	3.04045	0.220362	14.8086	4.28686
mm|chr1:69943088-69943147	ref|NM_029160|ens|ENSMUST00000065425|gb|BC120668|gb|BC145006		A_55_P2098614	NM_029160	ref|Mus musculus sperm associated antigen 16 (Spag16), transcript variant 1, mRNA [NM_029160]	Spag16	0.056572	5.99696	1	0.0488129	6.05559	0.862845	0.0664936	4.75976	1.17538	0.242349	16.2861	4.2839
mm|chr14:65765015-65765074			A_30_P01021095	chr14:65720392-65769859_F	lincRNA:chr14:65720392-65769859 forward strand	chr14:65720392-65769859_F	0.0481604	5.10528	1	0.10376	12.8721	2.15446	0.092034	6.588	1.91099	0.206281	13.8623	4.2832
mm|chr11:83038072-83038131	ref|NR_015519|ens|ENSMUST00000145461|ens|ENSMUST00000143673|gb|AK079857		A_55_P2078735	NR_015519	ref|Mus musculus expressed sequence AI662270 (AI662270), non-coding RNA [NR_015519]	AI662270	0.0479001	5.07768	1	0.0411564	5.10575	0.859214	0.0592425	4.24071	1.23679	0.205122	13.7844	4.28229
mm|chr1:6379566-6381144	ref|NM_001195732|gb|AK087278|tc|TC1623461|riken|E030041H06		A_52_P151240	NM_001195732	ref|Mus musculus family with sequence similarity 150, member A (Fam150a), mRNA [NM_001195732]	Fam150a	0.0522525	5.53906	1	0.0718772	8.9169	1.37557	0.44596	31.9228	8.53471	0.223753	15.0364	4.28215
mm|chr2:22768222-22768163			A_30_P01017523	chr2:22753100-22780375_R	lincRNA:chr2:22753100-22780375 reverse strand	chr2:22753100-22780375_R	0.0435981	4.62165	1	0.0381986	4.73882	0.876154	0.0540746	3.87078	1.2403	0.186634	12.542	4.28079
mm|chr3:88033384-88033443			A_30_P01019181	chr3:88009045-88036270_F	lincRNA:chr3:88009045-88036270 forward strand	chr3:88009045-88036270_F	0.0546426	5.79242	1	0.0476406	5.91016	0.871859	0.0645285	4.61909	1.18092	0.233912	15.7192	4.28077
mm|chr7:034639184-034639125			A_55_P1984607	A_55_P1984607	Unknown	A_55_P1984607	0.0501493	5.31611	1	0.0438619	5.44139	0.874627	0.063296	4.53087	1.26215	0.214638	14.4239	4.27999
mm|chr17:023578097-023578038	nap|NAP113112-1		A_55_P1957245	NAP113112-1	Unknown	NAP113112-1	3.88615	411.954	1	6.04872	750.388	1.55648	14.2902	1022.93	3.67723	16.6223	1117.04	4.27733
mm|chr13:83872367-83872308			A_30_P01021596	chr13:83867711-83878140_R	lincRNA:chr13:83867711-83878140 reverse strand	chr13:83867711-83878140_R	0.0426661	4.52285	1	0.0374639	4.64767	0.878071	0.0527818	3.77824	1.23709	0.182379	12.2561	4.27456
mm|chr9:72209602-72209543	gb|AK020810|riken|A930005F02|nap|NAP116705-1		A_55_P2314321	AK020810	gb|Mus musculus adult retina cDNA, RIKEN full-length enriched library, clone:A930005F02 product:unclassifiable, full insert sequence. [AK020810]	BC065403	0.0709539	7.52152	1	0.31908	39.5842	4.49701	0.246539	17.6478	3.47464	0.303237	20.3779	4.27372
mm|chr11:70327302-70327243	ref|NM_001013607|ens|ENSMUST00000021179|gb|BC152836|gb|BY752958		A_52_P265578	NM_001013607	ref|Mus musculus vitelline membrane outer layer 1 homolog (chicken) (Vmo1), mRNA [NM_001013607]	Vmo1	0.06235	6.60945	1	0.0949269	11.7764	1.52248	0.177308	12.6921	2.84376	0.266263	17.8932	4.27046
mm|chr13:60944319-60944260	ref|NM_178098|ens|ENSMUST00000091569|gb|AK145933|gb|AK015635		A_51_P276479	NM_178098	ref|Mus musculus RIKEN cDNA 4930486L24 gene (4930486L24Rik), mRNA [NM_178098]	4930486L24Rik	0.541805	57.4344	1	1.36436	169.259	2.51817	1.98914	142.387	3.67133	2.31324	155.452	4.2695
mm|chr15:101089446-101089387			A_30_P01025449	chr15:101088974-101089576_R	lincRNA:chr15:101088974-101089576 reverse strand	chr15:101088974-101089576_R	0.0782247	8.29226	1	0.090173	11.1866	1.15274	0.0695601	4.97927	0.889235	0.333842	22.4346	4.26774
mm|chr12:088984780-088984721			A_55_P1987675	A_55_P1987675	Unknown	A_55_P1987675	0.0575279	6.09828	1	0.0497626	6.17341	0.865017	0.068875	4.93023	1.19725	0.245383	16.49	4.26547
mm|chr17:80144297-80144356			A_30_P01022454	chr17:80133213-80144417_F	lincRNA:chr17:80133213-80144417 forward strand	chr17:80133213-80144417_F	0.0552258	5.85425	1	0.0478097	5.93114	0.865713	0.0663202	4.74735	1.20089	0.235396	15.8189	4.26243
mm|chr12:86817900-86817959	ref|NM_010234|ens|ENSMUST00000021674|gb|AK159667|gb|AK159688		A_52_P262219	NM_010234	ref|Mus musculus FBJ osteosarcoma oncogene (Fos), mRNA [NM_010234]	Fos	0.808642	85.7206	1	2.19091	271.798	2.70937	3.83022	274.176	4.73661	3.44551	231.542	4.26086
mm|chr7:150856449-150856508	gb|AK155734|tc|TC1690970|riken|F730213H03		A_55_P2259660	AK155734	gb|Mus musculus B6-derived CD11 +ve dendritic cells cDNA, RIKEN full-length enriched library, clone:F730213H03 product:unclassifiable, full insert sequence. [AK155734]	E230032D23Rik	0.0549617	5.82625	1	0.146827	18.215	2.67144	0.203964	14.6002	3.71103	0.234121	15.7332	4.2597
mm|chr2:132086419-132086478			A_30_P01030899	chr2:132079092-132086642_F	lincRNA:chr2:132079092-132086642 forward strand	chr2:132079092-132086642_F	0.0478229	5.0695	1	0.0807535	10.0181	1.68859	0.11228	8.03723	2.34782	0.203693	13.6884	4.25932
mm|chr17:7520066-7520008	ref|NM_001013832|ens|ENSMUST00000091648|gb|BC160363|nap|NAP061373-1		A_55_P2016099	NM_001013832	ref|Mus musculus G protein-coupled receptor 31, D17Leh66c region (Gpr31c), mRNA [NM_001013832]	Gpr31c	0.0438541	4.64879	1	0.0439968	5.45812	1.00325	0.250187	17.9089	5.70498	0.186686	12.5455	4.25699
mm|chr1:75363404-75363629	ref|NM_010043|gb|L22550|gb|AK131922|gb|BC031760		A_51_P335969	NM_010043	ref|Mus musculus desmin (Des), mRNA [NM_010043]	Des	0.0567845	6.01948	1	0.0399257	4.95307	0.703109	0.0571845	4.0934	1.00704	0.24172	16.2438	4.25679
mm|chr4:98945329-98945270			A_30_P01024825	chr4:98943050-98959998_R	lincRNA:chr4:98943050-98959998 reverse strand	chr4:98943050-98959998_R	0.0404283	4.28563	1	0.0465862	5.77935	1.15232	0.049874	3.5701	1.23364	0.172069	11.5633	4.25617
mm|chr12:72484608-72484549	ref|XR_105493|gb|AK019662|gb|AK006983|gb|BY707040		A_52_P662998	XR_105493	ref|PREDICTED: Mus musculus RIKEN cDNA 1700083H02 gene (1700083H02Rik), partial miscRNA [XR_105493]	1700083H02Rik	0.0456324	4.83729	1	0.0398919	4.94888	0.874202	0.115219	8.24765	2.52494	0.194185	13.0495	4.25543
mm|chr4:41671797-41671738	ref|NM_001017362|ens|ENSMUST00000084698|ens|ENSMUST00000171251|gb|BC141237		A_55_P2077278	NM_001017362	ref|Mus musculus AT rich interactive domain 3C (BRIGHT-like) (Arid3c), transcript variant 1, mRNA [NM_001017362]	Arid3c	0.0451112	4.78205	1	0.0397551	4.9319	0.881268	0.0546094	3.90907	1.21055	0.191954	12.8996	4.25514
mm|chr6:87384427-87384486	ref|NM_009756|ens|ENSMUST00000032125|gb|AF101033|gb|BC145044		A_55_P2037827	NM_009756	ref|Mus musculus bone morphogenetic protein 10 (Bmp10), mRNA [NM_009756]	Bmp10	0.0454708	4.82017	1	0.0624517	7.74759	1.37345	0.104963	7.5135	2.30836	0.193461	13.0008	4.25463
mm|chr5:52767548-52767489	ref|NM_001256059|gb|XM_003084620|tc|TC1631245		A_55_P2162175	NM_001256059	ref|Mus musculus coiled-coil domain containing 149 (Ccdc149), mRNA [NM_001256059]	Ccdc149	0.0479845	5.08663	1	0.0361884	4.48944	0.754169	0.0531457	3.80429	1.10756	0.204054	13.7127	4.25251
mm|chr7:113565123-113565064	ref|NR_003967|ens|ENSMUST00000066023|gb|AK041093|tc|TC1592344		A_55_P2023037	NR_003967	ref|Mus musculus predicted gene 4759 (Gm4759), non-coding RNA [NR_003967]	Gm4759	0.0497744	5.27637	1	0.0539187	6.68901	1.08326	0.321961	23.0467	6.4684	0.211558	14.2169	4.25034
mm|chr1:73438019-73437960	ref|NR_003202|gb|DQ059755		A_55_P2179186	NR_003202	ref|Mus musculus pregnancy induced noncoding RNA (Pinc), non-coding RNA [NR_003202]	Pinc	0.0482191	5.1115	1	0.0426318	5.28879	0.884127	0.0586872	4.20096	1.21709	0.204829	13.7647	4.24788
mm|chr9:34712550-34712609	ref|NM_001190914|ens|ENSMUST00000045091|gb|AK079332|tc|TC1612424		A_55_P2133032	NM_001190914	ref|Mus musculus kin of IRRE like 3 (Drosophila) (Kirrel3), transcript variant E, mRNA [NM_001190914]	Kirrel3	0.046886	4.97018	1	0.119193	14.7868	2.54219	0.0982417	7.03236	2.09533	0.199109	13.3803	4.24666
mm|chr15:61919209-61919268			A_30_P01018312	chr15:61919018-61935580_F	lincRNA:chr15:61919018-61935580 forward strand	chr15:61919018-61935580_F	0.0469193	4.97371	1	0.085196	10.5692	1.8158	0.0547578	3.91969	1.16707	0.199122	13.3812	4.24393
mm|chr2:28668519-28668578	ref|NM_001033874|ens|ENSMUST00000074156|gb|AK004439|gb|BC109352		A_51_P101006	NM_001033874	ref|Mus musculus adenylate kinase 8 (Ak8), mRNA [NM_001033874]	Ak8	0.0403524	4.27759	1	0.0764092	9.47912	1.89355	0.082431	5.9006	2.04278	0.171148	11.5013	4.24133
mm|chr6:95422409-95422350			A_30_P01028552	chr6:95418306-95424131_R	lincRNA:chr6:95418306-95424131 reverse strand	chr6:95418306-95424131_R	0.0551313	5.84424	1	0.193877	24.0518	3.51664	0.0680039	4.86788	1.23349	0.233713	15.7058	4.2392
mm|chr16:21926261-21926320	ref|NM_172821|ens|ENSMUST00000042065|gb|DQ480427|gb|AK047986		A_55_P1962791	NM_172821	ref|Mus musculus mitogen-activated protein kinase kinase kinase 13 (Map3k13), mRNA [NM_172821]	Map3k13	0.0498807	5.28764	1	0.0968306	12.0125	1.94124	0.0893167	6.39349	1.79061	0.211362	14.2038	4.23735
mm|chr17:21178525-21178466			A_30_P01031518	chr17:21177225-21187525_R	lincRNA:chr17:21177225-21187525 reverse strand	chr17:21177225-21187525_R	0.0500883	5.30964	1	0.0433292	5.3753	0.865057	0.146173	10.4634	2.9183	0.212174	14.2583	4.23599
mm|chr5:24727791-24727732	gb|AK021392|tc|TC1620189|riken|E130116L18|nap|NAP124523-1		A_66_P114167	AK021392	gb|Mus musculus 0 day neonate eyeball cDNA, RIKEN full-length enriched library, clone:E130116L18 product:hypothetical Type I antifreeze protein containing protein, full insert sequence. [AK021392]	E130116L18Rik	0.0478856	5.07615	1	0.0482255	5.98273	1.0071	0.0591548	4.23443	1.23534	0.202787	13.6275	4.23483
mm|chr11:87727524-87727465	ref|NM_146412|gb|BC120701|ens|ENSMUST00000074874|tc|TC1599962		A_55_P2005520	NM_146412	ref|Mus musculus olfactory receptor 464 (Olfr464), mRNA [NM_146412]	Olfr464	0.100478	10.6512	1	0.0467971	5.80552	0.465745	0.0640361	4.58385	0.637316	0.425385	28.5864	4.23362
mm|chr4:140912898-140912957			A_30_P01032638	chr4:140904589-140915114_F	lincRNA:chr4:140904589-140915114 forward strand	chr4:140904589-140915114_F	3.27036	346.677	1	4.22683	524.368	1.29246	11.0771	792.922	3.38711	13.8401	930.068	4.23197
mm|chr18:35976397-35976456			A_30_P01025703	chr18:35976163-35976530_F	lincRNA:chr18:35976163-35976530 forward strand	chr18:35976163-35976530_F	0.0488141	5.17458	1	0.0420665	5.21866	0.86177	0.091124	6.52286	1.86676	0.206506	13.8774	4.23045
mm|chr13:108577940-108577881			A_30_P01018769	chr13:108577843-108679708_R	lincRNA:chr13:108577843-108679708 reverse strand	chr13:108577843-108679708_R	0.061472	6.51639	1	0.0742268	9.20837	1.20749	0.341674	24.4578	5.5582	0.259788	17.458	4.22612
mm|chr3:97456410-97456469	ref|NM_001161765|ref|NM_001161763|ref|NM_010232|ens|ENSMUST00000029729		A_55_P1959595	NM_001161765	ref|Mus musculus flavin containing monooxygenase 5 (Fmo5), transcript variant 1, mRNA [NM_001161765]	Fmo5	0.267151	28.3195	1	0.463332	57.4797	1.73434	1.36296	97.564	5.10185	1.12786	75.7934	4.2218
mm|chr13:107821985-107822044			A_30_P01026891	chr13:107812547-107823601_F	lincRNA:chr13:107812547-107823601 forward strand	chr13:107812547-107823601_F	0.0518292	5.4942	1	0.174447	21.6414	3.3658	0.177286	12.6905	3.42058	0.218793	14.7031	4.22141
mm|chr10:8662933-8662874			A_30_P01031341	chr10:8662761-8665101_R	lincRNA:chr10:8662761-8665101 reverse strand	chr10:8662761-8665101_R	0.0445926	4.72707	1	0.0390529	4.84479	0.875771	0.0995447	7.12563	2.23232	0.188105	12.6408	4.2183
mm|chr16:69859059-69859000	ref|NM_173069|ens|ENSMUST00000076500|gb|BC152877|gb|AY151401		A_52_P594584	NM_173069	ref|Mus musculus spermatogenesis associated glutamate (E)-rich protein 2 (Speer2), mRNA [NM_173069]	Speer2	0.0471415	4.99727	1	0.0410134	5.08801	0.870005	0.0551766	3.94966	1.17044	0.198823	13.3611	4.21757
mm|chr15:97674075-97674016			A_30_P01026754	chr15:97674015-97674423_R	lincRNA:chr15:97674015-97674423 reverse strand	chr15:97674015-97674423_R	0.0999042	10.5904	1	0.0353567	4.38626	0.353906	0.0487778	3.49162	0.488245	0.42097	28.2896	4.21373
mm|chr1:67047503-67047444	ref|NM_021295|ref|NM_001190985|ref|NM_001190984|ens|ENSMUST00000113979		A_51_P142175	NM_021295	ref|Mus musculus LanC (bacterial lantibiotic synthetase component C)-like 1 (Lancl1), transcript variant 2, mRNA [NM_021295]	Lancl1	0.0513668	5.44517	1	0.105062	13.0337	2.04534	0.106204	7.60236	2.06757	0.216425	14.544	4.21332
mm|chr5:92552032-92551973			A_30_P01030286	chr5:92548501-92566401_R	lincRNA:chr5:92548501-92566401 reverse strand	chr5:92548501-92566401_R	0.0416688	4.41713	1	0.036238	4.49558	0.869666	0.0516549	3.69758	1.23965	0.175514	11.7947	4.21211
mm|chr8:24332342-24332401			A_30_P01022119	chr8:24327427-24332452_F	lincRNA:chr8:24327427-24332452 forward strand	chr8:24327427-24332452_F	0.0420689	4.45954	1	0.037099	4.60241	0.881864	0.0520665	3.72704	1.23765	0.177164	11.9056	4.21128
mm|chr14:99656698-99656639			A_30_P01023414	chr14:99656262-99656858_R	lincRNA:chr14:99656262-99656858 reverse strand	chr14:99656262-99656858_R	0.152308	16.1455	1	0.163047	20.2272	1.07051	0.221783	15.8757	1.45615	0.64124	43.092	4.21016
mm|chr8:25843516-25843457	ref|NM_007401|ens|ENSMUST00000118419|ens|ENSMUST00000164090|gb|AK161262		A_55_P2025746	NM_007401	ref|Mus musculus a disintegrin and metallopeptidase domain 5 (Adam5), mRNA [NM_007401]	Adam5	0.445942	47.2724	1	0.609442	75.6058	1.36664	1.05618	75.6037	2.36842	1.87567	126.047	4.20609
mm|chrX:98670057-98670116			A_30_P01017795	chrX:98669962-98670424_F	lincRNA:chrX:98669962-98670424 forward strand	chrX:98669962-98670424_F	0.0553949	5.87217	1	0.118783	14.7359	2.1443	0.316903	22.6846	5.7208	0.232853	15.648	4.20352
mm|chr13:94183762-94183821			A_30_P01024208	chr13:94183152-94184073_F	lincRNA:chr13:94183152-94184073 forward strand	chr13:94183152-94184073_F	0.0493022	5.22632	1	0.0424617	5.26768	0.861253	0.319148	22.8453	6.4733	0.207242	13.9269	4.2035
mm|chr14:55674895-55674954			A_30_P01033063	chr14:55672705-55675212_F	lincRNA:chr14:55672705-55675212 forward strand	chr14:55672705-55675212_F	0.097394	10.3243	1	0.0828076	10.2729	0.850233	0.148776	10.6497	1.52757	0.409297	27.5052	4.20249
mm|chr14:62281001-62280942			A_30_P01019014	chr14:62280837-62283960_R	lincRNA:chr14:62280837-62283960 reverse strand	chr14:62280837-62283960_R	0.0445846	4.72622	1	0.0893717	11.0872	2.00454	0.0548964	3.92961	1.23129	0.187355	12.5905	4.20224
mm|chr17:15680915-15680856	ref|NM_144809|ens|ENSMUST00000172335|ens|ENSMUST00000167994|gb|GU216230		A_55_P2027052	NM_144809	ref|Mus musculus PR domain containing 9 (Prdm9), mRNA [NM_144809]	Prdm9	0.0483972	5.13038	1	0.0990934	12.2933	2.0475	0.0601818	4.30795	1.2435	0.203372	13.6668	4.20214
mm|chr4:102690779-102690720	ref|NM_011831|ens|ENSMUST00000106869|ens|ENSMUST00000084382|gb|AF054842		A_55_P2255325	NM_011831	ref|Mus musculus insulin-like 5 (Insl5), mRNA [NM_011831]	Insl5	0.102307	10.8452	1	0.103756	12.8717	1.01416	0.355845	25.4722	3.4782	0.429852	28.8865	4.20157
mm|chr7:149856156-149856215	ref|NR_002855|gb|AB030734|tc|TC1658157|nap|NAP115520-1		A_66_P116635	NR_002855	ref|Mus musculus insulin-like growth factor 2, antisense (Igf2as), antisense RNA [NR_002855]	Igf2as	0.0475488	5.04045	1	0.219025	27.1717	4.60633	0.0640286	4.58331	1.34659	0.199761	13.4241	4.20117
mm|chr1:163528326-163528385			A_30_P01025143	chr1:163528200-163528398_F	lincRNA:chr1:163528200-163528398 forward strand	chr1:163528200-163528398_F	0.122042	12.9371	1	0.211235	26.2052	1.73084	0.317392	22.7196	2.60068	0.512474	34.4388	4.19917
mm|chr16:84708147-84708088			A_30_P01024115	chr16:84708005-84708675_R	lincRNA:chr16:84708005-84708675 reverse strand	chr16:84708005-84708675_R	0.0774106	8.20597	1	0.291541	36.1677	3.76616	0.163085	11.674	2.10675	0.325038	21.8429	4.19888
mm|chr11:116529433-116529492	ref|NM_001163318|ens|ENSMUST00000116318|gb|DQ390337|gb|AK137302		A_55_P2164469	NM_001163318	ref|Mus musculus predicted gene 11744 (Gm11744), mRNA [NM_001163318]	Gm11744	0.0913789	9.68668	1	0.175855	21.816	1.92445	0.113578	8.13016	1.24293	0.383638	25.7809	4.19832
mm|chr10:32915796-32915855	ref|NM_029726|ens|ENSMUST00000075979|ens|ENSMUST00000095762|gb|AF223416		A_55_P2401646	NM_029726	ref|Mus musculus triadin (Trdn), mRNA [NM_029726]	Trdn	0.0397886	4.21782	1	0.0345881	4.2909	0.869295	0.048762	3.49049	1.22553	0.167019	11.2239	4.19766
mm|chr4:11921278-11921219			A_30_P01017801	chr4:11899775-11931875_R	lincRNA:chr4:11899775-11931875 reverse strand	chr4:11899775-11931875_R	0.0571175	6.05478	1	0.0493377	6.1207	0.863793	0.304755	21.8151	5.33559	0.239675	16.1065	4.19618
mm|chr10:6382932-6382873	ref|NM_001033253|ref|NM_001159942|ens|ENSMUST00000120274|ens|ENSMUST00000042438		A_52_P285975	NM_001033253	ref|Mus musculus pleckstrin homology domain containing, family G (with RhoGef domain) member 1 (Plekhg1), transcript variant 2, mRNA [NM_001033253]	Plekhg1	0.0420607	4.45868	1	0.0592574	7.35131	1.40885	0.0565011	4.04447	1.34332	0.176479	11.8596	4.19581
mm|chr11:102888558-102888617			A_30_P01019615	chr11:102878974-102888924_F	lincRNA:chr11:102878974-102888924 forward strand	chr11:102878974-102888924_F	0.0506392	5.36805	1	0.0453839	5.6302	0.89622	0.0631288	4.5189	1.24664	0.212468	14.2781	4.19573
mm|chr17:26913259-26913318			A_30_P01025742	chr17:26911397-26917047_F	lincRNA:chr17:26911397-26917047 forward strand	chr17:26911397-26917047_F	0.37884	40.1592	1	0.871248	108.085	2.29978	1.40698	100.715	3.71391	1.58788	106.707	4.19143
mm|chr4:124127204-124127145	ref|NR_040774|ens|ENSMUST00000143859|gb|AK132134|riken|3110093C09		A_66_P125161	NR_040774	ref|Mus musculus RIKEN cDNA 1700057H15 gene (1700057H15Rik), non-coding RNA [NR_040774]	1700057H15Rik	0.332274	35.223	1	0.477896	59.2864	1.43826	0.845568	60.5276	2.54479	1.39238	93.5694	4.19045
mm|chr1:162967716-162967775			A_30_P01023313	chr1:162965309-162970704_F	lincRNA:chr1:162965309-162970704 forward strand	chr1:162965309-162970704_F	0.265859	28.1826	1	0.289531	35.9184	1.08904	0.288295	20.6368	1.08439	1.11365	74.8384	4.18886
mm|chr1:132783934-132783875	ref|NM_053095|ens|ENSMUST00000121040|ens|ENSMUST00000164265|tc|TC1679204		A_55_P1981224	NM_053095	ref|Mus musculus interleukin 24 (Il24), mRNA [NM_053095]	Il24	0.0489755	5.19168	1	0.119273	14.7967	2.43536	0.191384	13.6997	3.90776	0.20513	13.7849	4.18842
mm|chr7:91725854-91725795			A_30_P01020755	chr7:91558475-91733625_R	lincRNA:chr7:91558475-91733625 reverse strand	chr7:91558475-91733625_R	0.0539956	5.72385	1	0.0462856	5.74207	0.85721	0.06349	4.54475	1.17584	0.226116	15.1952	4.18766
mm|chr8:44605341-44605282	ref|NM_001009547|ens|ENSMUST00000080135|gb|BC165951|nap|NAP000967-001		A_55_P2125937	NM_001009547	ref|Mus musculus a disintegrin and metallopeptidase domain 26B (Adam26b), mRNA [NM_001009547]	Adam26b	0.0595057	6.30794	1	0.122522	15.1998	2.059	0.128882	9.22567	2.16588	0.249107	16.7402	4.18626
mm|chr2:131371257-131371198	ref|NM_013460		A_55_P2019954	NM_013460	ref|Mus musculus adrenergic receptor, alpha 1d (Adra1d), mRNA [NM_013460]	Adra1d	0.188695	20.0028	1	0.431801	53.5681	2.28835	0.978962	70.0763	5.18806	0.789908	53.0827	4.18616
mm|chr11:48926389-48926330	ref|NM_146337|ens|ENSMUST00000109201|ens|ENSMUST00000060398|gb|BC110471		A_55_P1963234	NM_146337	ref|Mus musculus olfactory receptor 1396 (Olfr1396), mRNA [NM_146337]	Olfr1396	0.0548911	5.81877	1	0.0478351	5.93429	0.871454	0.395862	28.3367	7.21177	0.229762	15.4402	4.18577
mm|chr6:68071630-68071689	ens|ENSMUST00000103317|gb|U30243|gb|X66622|gb|X66632		A_55_P2187067	ENSMUST00000103317	ens|immunoglobulin kappa variable 1-117 [Source:MGI Symbol;Acc:MGI:4439721] [ENSMUST00000103317]	ENSMUST00000103317	0.0525281	5.56827	1	0.0457106	5.67073	0.870213	0.107238	7.67634	2.04154	0.219854	14.7745	4.18546
mm|chr11:98218965-98219024	ref|NM_144828|ens|ENSMUST00000132443|ens|ENSMUST00000078694|gb|AK141563		A_55_P2026275	NM_144828	ref|Mus musculus protein phosphatase 1, regulatory (inhibitor) subunit 1B (Ppp1r1b), mRNA [NM_144828]	Ppp1r1b	0.0740065	7.84511	1	0.182462	22.6357	2.46548	0.284352	20.3546	3.84226	0.309605	20.8058	4.18348
mm|chr14:21036493-21036552			A_30_P01021478	chr14:21029450-21049451_F	lincRNA:chr14:21029450-21049451 forward strand	chr14:21029450-21049451_F	0.0686387	7.27609	1	0.0885112	10.9805	1.28952	0.332722	23.817	4.84745	0.287113	19.2943	4.18297
mm|chr3:57971393-57971452	gb|AK019551|tc|TC1632291|riken|4921539H07|nap|NAP073283-1		A_55_P2168218	AK019551	gb|Mus musculus adult male testis cDNA, RIKEN full-length enriched library, clone:4921539H07 product:unclassifiable, full insert sequence. [AK019551]	4921539H07Rik	0.0564639	5.9855	1	0.0486921	6.04061	0.862358	0.0675799	4.83752	1.19687	0.236177	15.8714	4.1828
mm|chr7:63028608-63028667	ens|ENSMUST00000171077|ens|ENSMUST00000169250|gb|AK080658|ens|ENSMUST00000121492		A_55_P2141008	ENSMUST00000171077	ens|sialic acid binding Ig-like lectin H [Source:MGI Symbol;Acc:MGI:2443256] [ENSMUST00000171077]	Siglech	0.0504021	5.34291	1	0.061393	7.61625	1.21807	0.0627178	4.48948	1.24435	0.210801	14.1661	4.1824
[truncated: 57,894 more rows]
