# Supplementary material for: Growth differentiation factor 6 derived from mesenchymal stem/stromal cells reduces age-related functional deterioration in multiple tissues
Source: Aging (Albany NY). 2016 Jun 14;8(6):1259–69. doi: 10.18632/aging.100982 (PMC4931831; doi:10.18632/aging.100982)
Supplement: Supplementary file 3 [file aging-08-1259-s003.xlsx]

## Sheet: miRNA qPCR array
Supplementary Table 2. miRNA qPCR array data of MSCs.
Sample	Detector	Task	Ct	delta Rn	Ct Avg	Avg Delta Ct	Endo Ct Avg	Endo Ct SD	delta delta Ct	RQ
young MSCs	mmu-let-7b-000378	Target	23.5628	3.15696	23.5628	1.67867	21.8842	0.151542	-2.41179	5.32134
young MSCs	mmu-let-7c-000379	Target	22.7073	4.01327	22.7073	0.823076	21.8842	0.151542	-2.30756	4.95044
young MSCs	mmu-let-7d-002283	Target	24.8513	3.29086	24.8513	2.96715	21.8842	0.151542	-0.664782	1.58533
young MSCs	mmu-let-7e-002406	Target	23.2452	3.26662	23.2452	1.36098	21.8842	0.151542	-0.559681	1.47394
young MSCs	mmu-let-7g-002282	Target	24.6916	2.51917	24.6916	2.80738	21.8842	0.151542	-1.43884	2.71103
young MSCs	mmu-let-7i-002221	Target	24.2547	2.77723	24.2547	2.37052	21.8842	0.151542	-1.49987	2.82818
young MSCs	mmu-miR-1-002222	Target	Undetermined	0.0589217	40	18.1158	21.8842	0.151542	2.56375	0.169135
young MSCs	rno-miR-1-002064	Target	36.2309	0.359003	36.2309	14.3467	21.8842	0.151542	-5.8951	59.5117
young MSCs	mmu-miR-7a-000268	Target	30.6697	2.1763	30.6697	8.78547	21.8842	0.151542	-5.90692	60.0011
young MSCs	mmu-miR-7b-002555	Target	31.8072	2.13614	31.8072	9.92302	21.8842	0.151542	-3.81911	14.1145
young MSCs	U6 snRNA-001973	Endogenous Control	21.8324	2.53265	21.8842		21.8842	0.151542
young MSCs	U6 snRNA-001973	Endogenous Control	21.8487	2.58459	21.8842		21.8842	0.151542
young MSCs	mmu-miR-9-000583	Target	28.9656	1.95845	28.9656	7.08146	21.8842	0.151542	-5.33662	40.4093
young MSCs	mmu-miR-10a-000387	Target	28.5975	1.76925	28.5975	6.71335	21.8842	0.151542	1.81387	0.284427
young MSCs	mmu-miR-10b-002218	Target	29.1389	1.25758	29.1389	7.25471	21.8842	0.151542	-10.3529	1307.82
young MSCs	mmu-miR-15a-000389	Target	31.1562	0.629939	31.1562	9.27205	21.8842	0.151542	-0.580585	1.49546
young MSCs	mmu-miR-15b-000390	Target	24.8777	3.52775	24.8777	2.99352	21.8842	0.151542	-1.0784	2.11169
young MSCs	mmu-miR-16-000391	Target	22.7133	3.38921	22.7133	0.829073	21.8842	0.151542	-0.387754	1.30836
young MSCs	rno-miR-17-3p-002078	Target	Undetermined	0.0108514	40	18.1158	21.8842	0.151542
young MSCs	mmu-miR-18a-002422	Target	27.6284	3.11468	27.6284	5.74421	21.8842	0.151542	-2.78403	6.88773
young MSCs	mmu-miR-18b-002466	Target	Undetermined	0.0147575	40	18.1158	21.8842	0.151542
young MSCs	mmu-miR-19a-000395	Target	27.2141	2.61451	27.2141	5.32997	21.8842	0.151542	0.454731	0.729646
young MSCs	mmu-miR-19b-000396	Target	22.1653	2.84299	22.1653	0.281164	21.8842	0.151542	-0.576902	1.49164
young MSCs	mmu-miR-20a-000580	Target	22.9634	3.91439	22.9634	1.07926	21.8842	0.151542	0.285862	0.820251
young MSCs	mmu-miR-20b-001014	Target	24.8146	2.76862	24.8146	2.93043	21.8842	0.151542	-0.831505	1.77954
young MSCs	rno-miR-20b-3p-002052	Target	Undetermined	0.0155892	40	18.1158	21.8842	0.151542
young MSCs	mmu-miR-21-000397	Target	22.2011	3.26562	22.2011	0.316952	21.8842	0.151542	-3.86667	14.5876
young MSCs	mmu-miR-23b-000400	Target	30.4004	1.36071	30.4004	8.51619	21.8842	0.151542	-0.336063	1.26231
young MSCs	mmu-miR-24-000402	Target	20.4877	3.74523	20.4877	-1.39651	21.8842	0.151542	-3.1691	8.99487
young MSCs	mmu-miR-25-000403	Target	27.4058	5.42266	27.4058	5.52166	21.8842	0.151542	0.388132	0.764118
young MSCs	mmu-miR-26a-000405	Target	24.2974	3.51738	24.2974	2.41319	21.8842	0.151542	0.190708	0.876175
young MSCs	mmu-miR-26b-000407	Target	26.2791	3.36929	26.2791	4.39495	21.8842	0.151542	0.141584	0.906523
young MSCs	mmu-miR-27a-000408	Target	24.7885	6.17477	24.7885	2.90427	21.8842	0.151542	-5.49481	45.0923
young MSCs	mmu-miR-27b-000409	Target	26.3763	4.143	26.3763	4.4921	21.8842	0.151542	-3.96805	15.6496
young MSCs	U6 snRNA-001973	Endogenous Control	22.2938	2.1881	21.8842		21.8842	0.151542
young MSCs	U6 snRNA-001973	Endogenous Control	21.5619	2.51738	21.8842		21.8842	0.151542
young MSCs	mmu-miR-28-000411	Target	25.6165	3.76015	25.6165	3.73229	21.8842	0.151542	-4.2839	19.4798
young MSCs	mmu-miR-29b-000413	Target	28.1517	2.10204	28.1517	6.26757	21.8842	0.151542	-4.8497	28.8341
young MSCs	mmu-miR-29c-000587	Target	23.6702	4.75603	23.6702	1.78604	21.8842	0.151542	-2.83532	7.137
young MSCs	mmu-miR-30b-000602	Target	24.4877	4.44727	24.4877	2.6035	21.8842	0.151542	-0.0512085	1.03613
young MSCs	mmu-miR-30c-000419	Target	24.2422	3.28594	24.2422	2.35806	21.8842	0.151542	-0.152824	1.11174
young MSCs	mmu-miR-30d-000420	Target	28.7331	2.91052	28.7331	6.84888	21.8842	0.151542	-0.0378685	1.0266
young MSCs	mmu-miR-32-002109	Target	Undetermined	0.0156341	40	18.1158	21.8842	0.151542	4.80744	0.0357123
young MSCs	mmu-miR-34a-000426	Target	24.7536	2.7072	24.7536	2.86938	21.8842	0.151542	-7.60261	194.363
young MSCs	mmu-miR-34c-000428	Target	28.1477	2.23416	28.1477	6.26352	21.8842	0.151542	-13.9783	16139.2
young MSCs	mmu-miR-93-001090	Target	26.0189	3.36266	26.0189	4.13471	21.8842	0.151542	0.175426	0.885506
young MSCs	mmu-miR-96-000186	Target	Undetermined	0.00461829	40	18.1158	21.8842	0.151542
young MSCs	mmu-miR-98-000577	Target	Undetermined	0.0524784	40	18.1158	21.8842	0.151542
young MSCs	mmu-miR-99a-000435	Target	23.5714	2.30165	23.5714	1.68722	21.8842	0.151542	-4.66194	25.3154
young MSCs	mmu-miR-99b-000436	Target	23.516	1.94642	23.516	1.63179	21.8842	0.151542	-5.371	41.3839
young MSCs	mmu-miR-100-000437	Target	23.1407	3.12378	23.1407	1.25651	21.8842	0.151542	-5.27677	38.7673
young MSCs	mmu-miR-101a-002253	Target	28.8401	3.66637	28.8401	6.95591	21.8842	0.151542	-1.09928	2.14248
young MSCs	mmu-miR-103-000439	Target	31.0067	0.680979	31.0067	9.12251	21.8842	0.151542	-0.110004	1.07923
young MSCs	mmu-miR-105-002465	Target	Undetermined	0.00897795	40	18.1158	21.8842	0.151542
young MSCs	mmu-miR-107-000443	Target	31.6984	1.28376	31.6984	9.81422	21.8842	0.151542	-4.17157	18.0206
young MSCs	mmu-miR-122-002245	Target	Undetermined	-0.000329912	40	18.1158	21.8842	0.151542
young MSCs	mmu-miR-124-001182	Target	29.2585	1.13535	29.2585	7.37436	21.8842	0.151542	-7.40418	169.387
young MSCs	mmu-miR-125a-3p-002199	Target	29.8355	2.38122	29.8355	7.95127	21.8842	0.151542	-7.62725	197.712
young MSCs	mmu-miR-125a-5p-002198	Target	25.3399	3.14739	25.3399	3.45576	21.8842	0.151542	-5.27052	38.5997
young MSCs	mmu-miR-125b-5p-000449	Target	20.837	4.34365	20.837	-1.0472	21.8842	0.151542	-6.4769	89.0718
young MSCs	mmu-miR-126-3p-002228	Target	30.9474	1.90973	30.9474	9.06323	21.8842	0.151542	5.93028	0.0163986
young MSCs	mmu-miR-126-5p-000451	Target	34.7315	0.478362	34.7315	12.8474	21.8842	0.151542	8.42542	0.00290868
young MSCs	mmu-miR-127-000452	Target	23.9701	4.225	23.9701	2.08594	21.8842	0.151542	-7.91244	240.925
young MSCs	mmu-miR-128a-002216	Target	33.887	0.643911	33.887	12.0028	21.8842	0.151542	2.92286	0.131866
young MSCs	mmu-miR-129-3p-001184	Target	28.4714	2.30469	28.4714	6.5872	21.8842	0.151542	-13.6546	12895.7
young MSCs	mmu-miR-130a-000454	Target	27.5597	2.36863	27.5597	5.6755	21.8842	0.151542	-1.86796	3.65016
young MSCs	mmu-miR-130b-000456	Target	29.026	1.74275	29.026	7.14178	21.8842	0.151542	-0.111557	1.08039
young MSCs	mmu-miR-132-000457	Target	24.1369	2.9291	24.1369	2.25267	21.8842	0.151542	-17.9891	260177
young MSCs	mmu-miR-133a-002246	Target	Undetermined	0.0383917	40	18.1158	21.8842	0.151542	5.4626	0.0226774
young MSCs	mmu-miR-133b-002247	Target	Undetermined	0.00466889	40	18.1158	21.8842	0.151542
young MSCs	mmu-miR-134-001186	Target	28.1184	1.16784	28.1184	6.23421	21.8842	0.151542	-14.0076	16470.5
young MSCs	mmu-miR-135a-000460	Target	31.1794	2.80571	31.1794	9.29518	21.8842	0.151542	-4.49075	22.4828
young MSCs	mmu-miR-135b-002261	Target	33.7515	1.33145	33.7515	11.8673	21.8842	0.151542	-5.85111	57.7246
young MSCs	mmu-miR-136-002511	Target	31.953	2.09694	31.953	10.0688	21.8842	0.151542	-10.173	1154.48
young MSCs	mmu-miR-137-001129	Target	Undetermined	-0.00378597	40	18.1158	21.8842	0.151542
young MSCs	mmu-miR-138-002284	Target	27.772	3.08069	27.772	5.88779	21.8842	0.151542	-4.28398	19.4807
young MSCs	mmu-miR-139-3p-002546	Target	Undetermined	0.0133035	40	18.1158	21.8842	0.151542
young MSCs	mmu-miR-139-5p-002289	Target	29.5161	1.95203	29.5161	7.63189	21.8842	0.151542	2.07444	0.237428
young MSCs	mmu-miR-140-001187	Target	24.6854	3.78215	24.6854	2.8012	21.8842	0.151542	-2.15761	4.46176
young MSCs	mmu-miR-141-000463	Target	Undetermined	0.0388427	40	18.1158	21.8842	0.151542
young MSCs	mmu-miR-142-3p-000464	Target	Undetermined	0.0102128	40	18.1158	21.8842	0.151542	14.1368	5.5515e-05
young MSCs	mmu-miR-142-5p-002248	Target	Undetermined	0.00276309	40	18.1158	21.8842	0.151542	4.81133	0.035616
young MSCs	snoRNA135-001230	Target	24.9095	2.31474	24.9095	3.02532	21.8842	0.151542	0.17701	0.884535
young MSCs	mmu-miR-145-002278	Target	24.4989	2.47805	24.4989	2.61472	21.8842	0.151542	-12.2434	4848.63
young MSCs	mmu-miR-146a-000468	Target	30.2763	1.90375	30.2763	8.39208	21.8842	0.151542	3.35996	0.0973982
young MSCs	mmu-miR-146b-001097	Target	28.1034	2.59023	28.1034	6.21925	21.8842	0.151542	1.71385	0.304845
young MSCs	mmu-miR-147-002262	Target	Undetermined	0.0250207	40	18.1158	21.8842	0.151542
young MSCs	mmu-miR-148a-000470	Target	28.8918	2.42747	28.8918	7.0076	21.8842	0.151542	-1.04651	2.06553
young MSCs	mmu-miR-148b-000471	Target	33.3663	0.611155	33.3663	11.4821	21.8842	0.151542	-0.294319	1.22631
young MSCs	mmu-miR-150-000473	Target	32.1164	2.27285	32.1164	10.2323	21.8842	0.151542	7.48174	0.00559464
young MSCs	mmu-miR-151-3p-001190	Target	29.2239	1.07695	29.2239	7.33972	21.8842	0.151542	-5.1928	36.5754
young MSCs	mmu-miR-152-000475	Target	25.8434	4.37462	25.8434	3.95919	21.8842	0.151542	-4.79312	27.7251
young MSCs	mmu-miR-153-001191	Target	Undetermined	0.0104487	40	18.1158	21.8842	0.151542
young MSCs	mmu-miR-154-000477	Target	Undetermined	0.0104776	40	18.1158	21.8842	0.151542
young MSCs	mmu-miR-181a-000480	Target	29.8851	1.0658	29.8851	8.00095	21.8842	0.151542	1.45365	0.365097
young MSCs	mmu-miR-181c-000482	Target	35.2222	0.652387	35.2222	13.338	21.8842	0.151542	3.47349	0.0900278
young MSCs	mmu-miR-182-002599	Target	28.3732	2.83638	28.3732	6.48899	21.8842	0.151542	-13.7528	13804.1
young MSCs	mmu-miR-183-002269	Target	35.1467	0.502134	35.1467	13.2625	21.8842	0.151542	-6.97929	126.176
young MSCs	mmu-miR-184-000485	Target	28.9307	3.29924	28.9307	7.04653	21.8842	0.151542	-13.1953	9379.35
young MSCs	mmu-miR-185-002271	Target	33.5924	0.505433	33.5924	11.7082	21.8842	0.151542	-1.62486	3.08413
young MSCs	mmu-miR-186-002285	Target	27.6375	3.34452	27.6375	5.75334	21.8842	0.151542	-2.27964	4.85556
young MSCs	mmu-miR-190-000489	Target	36.6471	0.596166	36.6471	14.7629	21.8842	0.151542	-5.47888	44.5971
young MSCs	mmu-miR-191-002299	Target	23.4029	3.42629	23.4029	1.5187	21.8842	0.151542	0.226446	0.854738
young MSCs	mmu-miR-192-000491	Target	30.5706	2.59867	30.5706	8.68644	21.8842	0.151542	-2.20027	4.59564
young MSCs	mmu-miR-193-002250	Target	34.4022	1.07736	34.4022	12.518	21.8842	0.151542	-7.72378	211.393
young MSCs	mmu-miR-193b-002467	Target	23.741	3.40055	23.741	1.85684	21.8842	0.151542	-5.80593	55.9448
young MSCs	mmu-miR-194-000493	Target	24.789	0.579148	24.789	2.90484	21.8842	0.151542	-0.148653	1.10853
young MSCs	mmu-miR-195-000494	Target	27.2262	3.44005	27.2262	5.34203	21.8842	0.151542	-0.384169	1.30511
young MSCs	mmu-miR-196b-002215	Target	29.0519	1.89236	29.0519	7.16767	21.8842	0.151542	1.60127	0.329587
young MSCs	rno-miR-196c-002049	Target	26.3972	2.2664	26.3972	4.51299	21.8842	0.151542	1.14508	0.452166
young MSCs	mmu-miR-197-000497	Target	32.147	0.532596	32.147	10.2629	21.8842	0.151542	-3.12264	8.70978
young MSCs	mmu-miR-199a-3p-002304	Target	24.0977	2.87103	24.0977	2.2135	21.8842	0.151542	-12.3837	5344.12
young MSCs	mmu-miR-199a-5p-000498	Target	30.9358	0.950344	30.9358	9.0516	21.8842	0.151542	-11.1902	2336.62
young MSCs	mmu-miR-200a-000502	Target	Undetermined	0.0160383	40	18.1158	21.8842	0.151542
young MSCs	mmu-miR-200b-002251	Target	Undetermined	0.0144674	40	18.1158	21.8842	0.151542	3.48994	0.0890067
young MSCs	mmu-miR-200c-002300	Target	Undetermined	0.0483453	40	18.1158	21.8842	0.151542	6.07726	0.0148103
young MSCs	mmu-miR-201-002578	Target	Undetermined	0.0133854	40	18.1158	21.8842	0.151542
young MSCs	mmu-miR-202-3p-001195	Target	Undetermined	0.0254374	40	18.1158	21.8842	0.151542
young MSCs	mmu-miR-202-5p-002579	Target	Undetermined	0.00465173	40	18.1158	21.8842	0.151542
young MSCs	mmu-miR-203-000507	Target	36.244	0.443835	36.244	14.3598	21.8842	0.151542	9.31238	0.00157288
young MSCs	mmu-miR-204-000508	Target	30.8254	1.42492	30.8254	8.94125	21.8842	0.151542	-11.3006	2522.36
young MSCs	mmu-miR-205-000509	Target	34.0657	1.31268	34.0657	12.1815	21.8842	0.151542	-8.06026	266.919
young MSCs	mmu-miR-207-001198	Target	Undetermined	0.0183114	40	18.1158	21.8842	0.151542
young MSCs	rno-miR-207-001315	Target	Undetermined	0.0283933	40	18.1158	21.8842	0.151542
young MSCs	mmu-miR-208-000511	Target	Undetermined	0.0424038	40	18.1158	21.8842	0.151542
young MSCs	mmu-miR-208b-002290	Target	Undetermined	0.0200539	40	18.1158	21.8842	0.151542
young MSCs	mmu-miR-210-000512	Target	26.0722	1.3978	26.0722	4.18798	21.8842	0.151542	-16.0538	68027.2
young MSCs	mmu-miR-211-001199	Target	Undetermined	0.011384	40	18.1158	21.8842	0.151542
young MSCs	mmu-miR-214-002306	Target	23.0581	3.96779	23.0581	1.17393	21.8842	0.151542	-19.0679	549544
young MSCs	mmu-miR-215-001200	Target	Undetermined	0.0403544	40	18.1158	21.8842	0.151542
young MSCs	snoRNA202-001232	Target	20.6712	3.94645	20.6712	-1.21294	21.8842	0.151542	0.000478744	0.999668
young MSCs	mmu-miR-216a-002220	Target	Undetermined	0.0126587	40	18.1158	21.8842	0.151542
young MSCs	mmu-miR-216b-002326	Target	Undetermined	0.00234729	40	18.1158	21.8842	0.151542
young MSCs	mmu-miR-217-002556	Target	Undetermined	-0.00234306	40	18.1158	21.8842	0.151542
young MSCs	mmu-miR-218-000521	Target	25.5574	4.46508	25.5574	3.67318	21.8842	0.151542	-7.55075	187.501
young MSCs	mmu-miR-219-000522	Target	Undetermined	0.000977874	40	18.1158	21.8842	0.151542
young MSCs	mmu-miR-220-002468	Target	Undetermined	0.00367397	40	18.1158	21.8842	0.151542
young MSCs	mmu-miR-221-000524	Target	23.2876	3.84027	23.2876	1.40343	21.8842	0.151542	-4.35689	20.4906
young MSCs	mmu-miR-222-002276	Target	21.0998	3.75832	21.0998	-0.784348	21.8842	0.151542	-1.6845	3.21428
young MSCs	mmu-miR-223-002295	Target	31.232	2.61582	31.232	9.34782	21.8842	0.151542	6.5343	0.0107889
young MSCs	mmu-miR-224-002553	Target	28.6099	2.58199	28.6099	6.72569	21.8842	0.151542	-0.607348	1.52346
young MSCs	mmu-miR-290-3p-002591	Target	Undetermined	0.0105138	40	18.1158	21.8842	0.151542
young MSCs	mmu-miR-291a-3p-002592	Target	Undetermined	0.00168073	40	18.1158	21.8842	0.151542
young MSCs	mmu-miR-291b-5p-002537	Target	Undetermined	-0.0038628	40	18.1158	21.8842	0.151542
young MSCs	mmu-miR-292-3p-002593	Target	Undetermined	0.00657207	40	18.1158	21.8842	0.151542
young MSCs	mmu-miR-293-001794	Target	Undetermined	-0.00011003	40	18.1158	21.8842	0.151542
young MSCs	mmu-miR-294-001056	Target	Undetermined	0.014635	40	18.1158	21.8842	0.151542
young MSCs	mmu-miR-295-000189	Target	Undetermined	0.0459723	40	18.1158	21.8842	0.151542
young MSCs	mmu-miR-296-3p-002101	Target	Undetermined	0.0223747	40	18.1158	21.8842	0.151542
young MSCs	mmu-miR-296-5p-000527	Target	29.3954	1.3517	29.3954	7.51126	21.8842	0.151542	-1.95564	3.87889
young MSCs	mmu-miR-297c-002480	Target	Undetermined	0.0444088	40	18.1158	21.8842	0.151542
young MSCs	mmu-miR-297b-5p-001626	Target	Undetermined	0.00659972	40	18.1158	21.8842	0.151542
young MSCs	mmu-miR-298-002598	Target	Undetermined	0.0316765	40	18.1158	21.8842	0.151542
young MSCs	mmu-miR-301a-000528	Target	28.8171	2.52208	28.8171	6.93288	21.8842	0.151542	-2.29123	4.89474
young MSCs	mmu-miR-301b-002600	Target	29.6579	1.93964	29.6579	7.77367	21.8842	0.151542	-1.03428	2.04809
young MSCs	mmu-miR-302a-000529	Target	39.7398	0.227393	39.7398	17.8556	21.8842	0.151542	-2.38617	5.22767
young MSCs	mmu-miR-302c-002558	Target	Undetermined	0.0106605	40	18.1158	21.8842	0.151542
young MSCs	mmu-miR-302d-000535	Target	Undetermined	0.0151549	40	18.1158	21.8842	0.151542
young MSCs	mmu-miR-320-002277	Target	25.709	2.99194	25.709	3.82484	21.8842	0.151542	-1.80367	3.49108
young MSCs	mmu-miR-323-3p-002227	Target	32.8248	0.741895	32.8248	10.9406	21.8842	0.151542	-9.30117	630.855
young MSCs	mmu-miR-324-5p-000539	Target	27.4363	2.97093	27.4363	5.55207	21.8842	0.151542	-4.31044	19.8414
young MSCs	mmu-miR-325-002510	Target	Undetermined	0.00306445	40	18.1158	21.8842	0.151542
young MSCs	rno-miR-327-001328	Target	Undetermined	0.0713737	40	18.1158	21.8842	0.151542
young MSCs	mmu-miR-328-000543	Target	25.3566	3.1984	25.3566	3.47239	21.8842	0.151542	-1.67507	3.19334
young MSCs	mmu-miR-329-000192	Target	32.0261	1.40035	32.0261	10.1419	21.8842	0.151542	-10.0999	1097.43
young MSCs	mmu-miR-330-002230	Target	Undetermined	0.00247467	40	18.1158	21.8842	0.151542
young MSCs	mmu-miR-331-3p-000545	Target	26.8508	2.85923	26.8508	4.96662	21.8842	0.151542	-2.60799	6.09655
young MSCs	mmu-miR-331-5p-002233	Target	38.393	0.263764	38.393	16.5088	21.8842	0.151542	-3.73301	13.2969
young MSCs	rno-miR-333-001329	Target	Undetermined	0.0137566	40	18.1158	21.8842	0.151542
young MSCs	mmu-miR-335-3p-002185	Target	Undetermined	0.0269226	40	18.1158	21.8842	0.151542
young MSCs	mmu-miR-335-5p-000546	Target	34.2623	0.919005	34.2623	12.3781	21.8842	0.151542	-7.86373	232.927
young MSCs	rno-miR-336-001331	Target	Undetermined	-0.00198299	40	18.1158	21.8842	0.151542
young MSCs	mmu-miR-337-3p-002532	Target	31.6596	1.80743	31.6596	9.77538	21.8842	0.151542	-10.4664	1414.84
young MSCs	mmu-miR-337-5p-002515	Target	28.2714	3.31181	28.2714	6.38722	21.8842	0.151542	-8.57728	381.961
young MSCs	mmu-miR-338-3p-002252	Target	Undetermined	0.00927895	40	18.1158	21.8842	0.151542
young MSCs	mmu-miR-339-3p-002533	Target	Undetermined	0.0354692	40	18.1158	21.8842	0.151542	6.87208	0.00853688
young MSCs	rno-miR-339-3p-002059	Target	Undetermined	0.0206345	40	18.1158	21.8842	0.151542
young MSCs	mmu-miR-339-5p-002257	Target	37.1604	0.322044	37.1604	15.2762	21.8842	0.151542	1.63778	0.32135
young MSCs	U87-001712	Target	24.9448	2.99376	24.9448	3.06058	21.8842	0.151542	-0.871594	1.82968
young MSCs	mmu-miR-340-3p-002259	Target	31.0267	2.86829	31.0267	9.14256	21.8842	0.151542	1.11715	0.461003
young MSCs	mmu-miR-340-5p-002258	Target	Undetermined	0.0647821	40	18.1158	21.8842	0.151542	9.62189	0.00126918
young MSCs	mmu-miR-342-3p-002260	Target	28.9636	1.82362	28.9636	7.07941	21.8842	0.151542	-2.18808	4.55699
young MSCs	mmu-miR-342-5p-002527	Target	Undetermined	0.0279567	40	18.1158	21.8842	0.151542	0.015913	0.989031
young MSCs	rno-miR-343-001344	Target	Undetermined	0.0246027	40	18.1158	21.8842	0.151542
young MSCs	mmu-miR-344-001063	Target	Undetermined	0.0277606	40	18.1158	21.8842	0.151542
young MSCs	rno-miR-344-3p-001332	Target	Undetermined	0.00423187	40	18.1158	21.8842	0.151542
young MSCs	rno-miR-344-5p-002060	Target	Undetermined	0.0119145	40	18.1158	21.8842	0.151542
young MSCs	mmu-miR-345-3p-002529	Target	35.3413	0.502107	35.3413	13.4572	21.8842	0.151542	-6.78464	110.251
young MSCs	rno-miR-345-3p-002061	Target	30.5884	2.4992	30.5884	8.70426	21.8842	0.151542	-4.00717	16.0797
young MSCs	mmu-miR-345-5p-002528	Target	33.6281	0.499244	33.6281	11.7439	21.8842	0.151542	-0.603093	1.51897
young MSCs	mmu-miR-346-001064	Target	Undetermined	0.0028955	40	18.1158	21.8842	0.151542
young MSCs	rno-miR-346-001333	Target	Undetermined	0.00280577	40	18.1158	21.8842	0.151542
young MSCs	rno-miR-347-001334	Target	Undetermined	-0.00300223	40	18.1158	21.8842	0.151542
young MSCs	rno-miR-349-001335	Target	Undetermined	0.00273564	40	18.1158	21.8842	0.151542
young MSCs	mmu-miR-350-002530	Target	28.8629	2.72499	28.8629	6.97873	21.8842	0.151542	-5.58583	48.029
young MSCs	rno-miR-351-002063	Target	31.0322	1.8667	31.0322	9.148	21.8842	0.151542	-2.26373	4.80232
young MSCs	mmu-miR-361-000554	Target	32.367	1.1589	32.367	10.4829	21.8842	0.151542	-0.845648	1.79707
young MSCs	mmu-miR-362-3p-002616	Target	30.9288	2.95918	30.9288	9.04459	21.8842	0.151542	-5.33106	40.2541
young MSCs	mmu-miR-363-001271	Target	Undetermined	0.0346172	40	18.1158	21.8842	0.151542	0.454187	0.729921
young MSCs	mmu-miR-365-001020	Target	26.4534	2.20253	26.4534	4.56923	21.8842	0.151542	-6.56183	94.4728
young MSCs	mmu-miR-367-000555	Target	Undetermined	0.0521597	40	18.1158	21.8842	0.151542
young MSCs	mmu-miR-369-3p-000557	Target	31.8287	4.72649	31.8287	9.94452	21.8842	0.151542	-10.2973	1258.32
young MSCs	mmu-miR-369-5p-001021	Target	32.5283	2.72623	32.5283	10.6442	21.8842	0.151542	-9.59764	774.778
young MSCs	mmu-miR-370-002275	Target	33.4484	0.482632	33.4484	11.5643	21.8842	0.151542	-8.67755	409.451
young MSCs	mmu-miR-375-000564	Target	37.7602	0.302737	37.7602	15.8761	21.8842	0.151542	0.185779	0.879174
young MSCs	mmu-miR-376a-001069	Target	32.3357	1.02871	32.3357	10.4515	21.8842	0.151542	-9.7903	885.47
young MSCs	mmu-miR-376b-002452	Target	32.3048	0.813242	32.3048	10.4206	21.8842	0.151542	-9.82116	904.613
young MSCs	mmu-miR-376c-002450	Target	25.9617	6.3252	25.9617	4.07754	21.8842	0.151542	-9.70805	836.401
young MSCs	mmu-miR-377-000566	Target	Undetermined	0.0134134	40	18.1158	21.8842	0.151542
young MSCs	rno-miR-377-001320	Target	Undetermined	0.00155431	40	18.1158	21.8842	0.151542
young MSCs	mmu-miR-379-001138	Target	25.6439	2.90371	25.6439	3.75973	21.8842	0.151542	-16.4821	91537.3
young MSCs	mmu-miR-380-3p-001071	Target	Undetermined	0.000330806	40	18.1158	21.8842	0.151542
young MSCs	mmu-miR-380-5p-002601	Target	30.2357	2.79939	30.2357	8.3515	21.8842	0.151542	-11.8903	3796.1
young MSCs	mmu-miR-381-000571	Target	33.54	2.95722	33.54	11.6558	21.8842	0.151542	-8.58599	384.275
young MSCs	mmu-miR-382-000572	Target	27.5809	1.3018	27.5809	5.69676	21.8842	0.151542	-14.545	23905.3
young MSCs	mmu-miR-383-001767	Target	Undetermined	0.039732	40	18.1158	21.8842	0.151542
young MSCs	mmu-miR-384-3p-002603	Target	Undetermined	-0.00148976	40	18.1158	21.8842	0.151542
young MSCs	mmu-miR-384-5p-002602	Target	Undetermined	0.0140598	40	18.1158	21.8842	0.151542
young MSCs	mmu-miR-409-3p-002332	Target	24.2427	3.98345	24.2427	2.35847	21.8842	0.151542	-9.12552	558.542
young MSCs	mmu-miR-409-5p-002331	Target	Undetermined	0.01897	40	18.1158	21.8842	0.151542
young MSCs	mmu-miR-410-001274	Target	28.5396	2.8199	28.5396	6.65547	21.8842	0.151542	-9.84457	919.416
young MSCs	mmu-miR-411-001610	Target	25.4386	4.69462	25.4386	3.55442	21.8842	0.151542	-7.6196	196.666
young MSCs	rno-miR-421-001343	Target	Undetermined	0.0156616	40	18.1158	21.8842	0.151542
young MSCs	mmu-miR-423-5p-002340	Target	32.0802	0.559029	32.0802	10.196	21.8842	0.151542	0.193308	0.874598
young MSCs	mmu-miR-425-001516	Target	Undetermined	0.0359253	40	18.1158	21.8842	0.151542	8.3817	0.00299818
young MSCs	mmu-miR-429-001077	Target	Undetermined	0.0414384	40	18.1158	21.8842	0.151542
young MSCs	Y1-001727	Target	24.6594	2.5897	24.6594	2.77518	21.8842	0.151542	-5.73628	53.3079
young MSCs	mmu-miR-431-001979	Target	36.3217	0.340522	36.3217	14.4375	21.8842	0.151542	-5.80431	55.882
young MSCs	mmu-miR-433-001028	Target	33.9978	0.404373	33.9978	12.1136	21.8842	0.151542	-8.1282	279.79
young MSCs	mmu-miR-434-3p-002604	Target	25.708	3.63784	25.708	3.82379	21.8842	0.151542	-7.22597	149.704
young MSCs	mmu-miR-434-5p-002581	Target	30.105	2.00447	30.105	8.2208	21.8842	0.151542	-6.3904	83.8882
young MSCs	mmu-miR-448-001029	Target	Undetermined	0.00301355	40	18.1158	21.8842	0.151542
young MSCs	mmu-miR-449a-001030	Target	31.9183	2.83665	31.9183	10.0341	21.8842	0.151542	-4.49299	22.5177
young MSCs	mmu-miR-449b-002539	Target	Undetermined	0.0100125	40	18.1158	21.8842	0.151542
young MSCs	mmu-miR-450a-5p-002303	Target	36.5816	0.362476	36.5816	14.6974	21.8842	0.151542	2.77704	0.145891
young MSCs	mmu-miR-450b-5p-001962	Target	Undetermined	0.0405223	40	18.1158	21.8842	0.151542
young MSCs	mmu-miR-451-001141	Target	Undetermined	0.00952029	40	18.1158	21.8842	0.151542	7.96079	0.00401388
young MSCs	mmu-miR-453-002484	Target	Undetermined	0.0047397	40	18.1158	21.8842	0.151542
young MSCs	mmu-miR-455-002455	Target	Undetermined	0.0161495	40	18.1158	21.8842	0.151542
young MSCs	mmu-miR-465a-3p-002040	Target	Undetermined	0.0105057	40	18.1158	21.8842	0.151542
young MSCs	mmu-miR-465a-5p-001082	Target	Undetermined	-0.000334382	40	18.1158	21.8842	0.151542
young MSCs	mmu-miR-465b-5p-002485	Target	Undetermined	0.00856876	40	18.1158	21.8842	0.151542
young MSCs	rno-miR-466b-002066	Target	34.5212	0.42302	34.5212	12.6371	21.8842	0.151542	-7.60474	194.65
young MSCs	rno-miR-466c-002067	Target	Undetermined	-0.00571531	40	18.1158	21.8842	0.151542
young MSCs	mmu-miR-466h-002516	Target	Undetermined	0.0303251	40	18.1158	21.8842	0.151542
young MSCs	mmu-miR-467a-002587	Target	27.8822	3.76827	27.8822	5.99802	21.8842	0.151542	-3.44048	10.8564
young MSCs	mmu-miR-467c-002517	Target	31.2161	1.14348	31.2161	9.33192	21.8842	0.151542	-2.89948	7.46157
young MSCs	mmu-miR-467d-002518	Target	35.1658	0.550149	35.1658	13.2816	21.8842	0.151542	-6.63988	99.725
young MSCs	mmu-miR-467e-002568	Target	33.5547	0.548695	33.5547	11.6705	21.8842	0.151542	-4.49978	22.6239
young MSCs	mmu-miR-470-002588	Target	Undetermined	0.0103223	40	18.1158	21.8842	0.151542
young MSCs	mmu-miR-484-001821	Target	22.8155	3.65473	22.8155	0.931282	21.8842	0.151542	-2.6511	6.28147
young MSCs	mmu-miR-486-001278	Target	Undetermined	0.0141893	40	18.1158	21.8842	0.151542
young MSCs	mmu-miR-487b-001285	Target	Undetermined	0.00671482	40	18.1158	21.8842	0.151542
young MSCs	mmu-miR-489-001302	Target	Undetermined	0.0181286	40	18.1158	21.8842	0.151542
young MSCs	mmu-miR-491-001630	Target	32.8317	0.774454	32.8317	10.9475	21.8842	0.151542	-0.290209	1.22282
young MSCs	mmu-miR-493-002519	Target	Undetermined	0.0513579	40	18.1158	21.8842	0.151542
young MSCs	mmu-miR-494-002365	Target	26.0232	2.98036	26.0232	4.13902	21.8842	0.151542	-15.0593	34141.8
young MSCs	mmu-miR-495-001663	Target	27.6834	2.00594	27.6834	5.7992	21.8842	0.151542	-7.09592	136.8
young MSCs	mmu-miR-497-001346	Target	35.03	0.462336	35.03	13.1458	21.8842	0.151542	0.366126	0.775863
young MSCs	mmu-miR-499-001352	Target	Undetermined	0.0194352	40	18.1158	21.8842	0.151542
young MSCs	mmu-miR-500-002606	Target	37.2137	0.309271	37.2137	15.3295	21.8842	0.151542	-4.91233	30.1132
young MSCs	mmu-miR-501-3p-001651	Target	Undetermined	0.0184124	40	18.1158	21.8842	0.151542
young MSCs	mmu-miR-503-002456	Target	Undetermined	0.00879475	40	18.1158	21.8842	0.151542
young MSCs	mmu-miR-504-002084	Target	Undetermined	-0.00381193	40	18.1158	21.8842	0.151542
young MSCs	mmu-miR-505-001655	Target	Undetermined	-0.0013625	40	18.1158	21.8842	0.151542
young MSCs	mmu-miR-509-3p-002521	Target	Undetermined	0.0716507	40	18.1158	21.8842	0.151542
young MSCs	mmu-miR-509-5p-002520	Target	Undetermined	0.00642049	40	18.1158	21.8842	0.151542
young MSCs	mmu-miR-511-002549	Target	Undetermined	-0.00360632	40	18.1158	21.8842	0.151542
young MSCs	mmu-miR-532-3p-002355	Target	26.9277	3.22658	26.9277	5.04356	21.8842	0.151542	-1.26782	2.40798
young MSCs	mmu-miR-532-5p-001518	Target	26.2539	3.91959	26.2539	4.36972	21.8842	0.151542	-1.71292	3.27823
young MSCs	rno-miR-532-5p-002051	Target	32.5024	0.539627	32.5024	10.6182	21.8842	0.151542	-0.0269527	1.01886
young MSCs	mmu-miR-539-001286	Target	Undetermined	0.0222852	40	18.1158	21.8842	0.151542
young MSCs	mmu-miR-540-3p-001310	Target	Undetermined	0.00168508	40	18.1158	21.8842	0.151542
young MSCs	mmu-miR-540-5p-002561	Target	Undetermined	-0.00472534	40	18.1158	21.8842	0.151542
young MSCs	ath-miR159a-000338	Target	Undetermined	0.024861	40	18.1158	21.8842	0.151542
young MSCs	mmu-miR-542-3p-001284	Target	34.1481	1.50573	34.1481	12.264	21.8842	0.151542	-0.769956	1.70522
young MSCs	mmu-miR-542-5p-002563	Target	Undetermined	0.0337294	40	18.1158	21.8842	0.151542	1.20127	0.434891
young MSCs	mmu-miR-543-002376	Target	28.9128	1.8067	28.9128	7.0286	21.8842	0.151542	-9.73719	853.467
young MSCs	rno-miR-543-002065	Target	Undetermined	-0.0010128	40	18.1158	21.8842	0.151542
young MSCs	mmu-miR-544-002550	Target	34.2473	1.19309	34.2473	12.3632	21.8842	0.151542	-7.87865	235.348
young MSCs	mmu-miR-551b-001535	Target	Undetermined	0.0167753	40	18.1158	21.8842	0.151542
young MSCs	mmu-miR-574-3p-002349	Target	27.8071	2.30216	27.8071	5.92294	21.8842	0.151542	-3.82205	14.1434
young MSCs	mmu-miR-582-3p-002567	Target	34.9273	0.906222	34.9273	13.0432	21.8842	0.151542	-7.19864	146.894
young MSCs	mmu-miR-582-5p-002566	Target	Undetermined	0.000783205	40	18.1158	21.8842	0.151542
young MSCs	mmu-miR-590-5p-001984	Target	Undetermined	0.0621343	40	18.1158	21.8842	0.151542
young MSCs	mmu-miR-598-002476	Target	Undetermined	-0.00106698	40	18.1158	21.8842	0.151542
young MSCs	rno-miR-598-5p-002053	Target	Undetermined	-0.00137022	40	18.1158	21.8842	0.151542
young MSCs	mmu-miR-615-3p-001960	Target	Undetermined	0.00497925	40	18.1158	21.8842	0.151542
young MSCs	mmu-miR-615-5p-002353	Target	Undetermined	0.0284248	40	18.1158	21.8842	0.151542
young MSCs	mmu-miR-654-3p-002239	Target	Undetermined	-0.00834352	40	18.1158	21.8842	0.151542
young MSCs	mmu-miR-654-5p-002522	Target	Undetermined	0.0408011	40	18.1158	21.8842	0.151542
young MSCs	mmu-miR-665-002607	Target	37.8379	0.301537	37.8379	15.9537	21.8842	0.151542	-4.2881	19.5364
young MSCs	mmu-miR-666-5p-001952	Target	38.041	0.27173	38.041	16.1568	21.8842	0.151542	-4.08503	16.9714
young MSCs	mmu-miR-669a-001683	Target	31.9297	0.86996	31.9297	10.0456	21.8842	0.151542	-2.80875	7.00676
young MSCs	mmu-miR-671-3p-002322	Target	28.8352	3.47158	28.8352	6.95104	21.8842	0.151542	-2.20261	4.6031
young MSCs	mmu-miR-672-002327	Target	Undetermined	0.0314618	40	18.1158	21.8842	0.151542
young MSCs	rno-miR-673-002054	Target	Undetermined	0.000518024	40	18.1158	21.8842	0.151542
young MSCs	mmu-miR-674-002021	Target	31.6853	0.652011	31.6853	9.80114	21.8842	0.151542	-1.32429	2.50409
young MSCs	mmu-miR-708-002341	Target	31.7105	2.69296	31.7105	9.82631	21.8842	0.151542	-9.2835	623.18
young MSCs	mmu-miR-741-002457	Target	39.7445	0.207672	39.7445	17.8603	21.8842	0.151542	-2.38148	5.21072
young MSCs	mmu-miR-742-002038	Target	Undetermined	0.00637502	40	18.1158	21.8842	0.151542
young MSCs	rno-miR-742-002055	Target	Undetermined	-0.000991225	40	18.1158	21.8842	0.151542
young MSCs	mmu-miR-743b-3p-002471	Target	Undetermined	-0.0029282	40	18.1158	21.8842	0.151542
young MSCs	mmu-miR-743b-5p-002470	Target	Undetermined	0.0470397	40	18.1158	21.8842	0.151542
young MSCs	mmu-miR-743a-002469	Target	Undetermined	0.027761	40	18.1158	21.8842	0.151542
young MSCs	rno-miR-743b-002068	Target	Undetermined	0.0123704	40	18.1158	21.8842	0.151542
young MSCs	mmu-miR-744-002324	Target	27.4824	3.05469	27.4824	5.59817	21.8842	0.151542	-1.31569	2.48922
young MSCs	rno-miR-758-001990	Target	35.8951	0.37219	35.8951	14.0109	21.8842	0.151542	-6.23092	75.1091
young MSCs	rno-miR-760-5p-002057	Target	Undetermined	-3.43025e-05	40	18.1158	21.8842	0.151542
young MSCs	mmu-miR-770-3p-002027	Target	Undetermined	0.0165883	40	18.1158	21.8842	0.151542
young MSCs	mmu-miR-802-002029	Target	Undetermined	0.0121248	40	18.1158	21.8842	0.151542
young MSCs	mmu-miR-871-002354	Target	Undetermined	0.00611842	40	18.1158	21.8842	0.151542
young MSCs	rno-miR-871-002069	Target	Undetermined	0.0151581	40	18.1158	21.8842	0.151542
young MSCs	mmu-miR-872-002264	Target	28.8412	3.59487	28.8412	6.95705	21.8842	0.151542	-1.86527	3.64336
young MSCs	mmu-miR-873-002356	Target	Undetermined	0.00348061	40	18.1158	21.8842	0.151542
young MSCs	mmu-miR-874-002268	Target	Undetermined	-0.00425291	40	18.1158	21.8842	0.151542
young MSCs	mmu-miR-875-3p-002547	Target	Undetermined	0.00104392	40	18.1158	21.8842	0.151542
young MSCs	mmu-miR-876-3p-002464	Target	Undetermined	0.0133606	40	18.1158	21.8842	0.151542
young MSCs	mmu-miR-876-5p-002463	Target	Undetermined	0.00807053	40	18.1158	21.8842	0.151542
young MSCs	rno-miR-878-002070	Target	Undetermined	0.0211937	40	18.1158	21.8842	0.151542
young MSCs	mmu-miR-878-5p-002540	Target	Undetermined	0.0082804	40	18.1158	21.8842	0.151542
young MSCs	mmu-miR-879-002472	Target	Undetermined	-0.00763154	40	18.1158	21.8842	0.151542
young MSCs	mmu-miR-881-002609	Target	Undetermined	-0.00397778	40	18.1158	21.8842	0.151542
young MSCs	rno-miR-881-002072	Target	Undetermined	0.00592411	40	18.1158	21.8842	0.151542
young MSCs	mmu-miR-883a-3p-002461	Target	Undetermined	-0.0089677	40	18.1158	21.8842	0.151542
young MSCs	mmu-miR-883b-3p-002565	Target	Undetermined	-0.00610667	40	18.1158	21.8842	0.151542
young MSCs	mmu-miR-883a-5p-002611	Target	Undetermined	-0.00453389	40	18.1158	21.8842	0.151542
young MSCs	mmu-miR-125b-3p-002378	Target	28.6993	2.05036	28.6993	6.81511	21.8842	0.151542	-13.4267	11011.3
young MSCs	mmu-miR-143-002249	Target	26.1699	2.80673	26.1699	4.28573	21.8842	0.151542	-15.9561	63570.9
young MSCs	rno-miR-219-1-3p-002077	Target	Undetermined	0.00603324	40	18.1158	21.8842	0.151542
young MSCs	rno-miR-219-2-3p-002390	Target	Undetermined	0.00197351	40	18.1158	21.8842	0.151542
young MSCs	rno-miR-224-000599	Target	28.6561	1.99508	28.6561	6.77191	21.8842	0.151542	-3.23497	9.41506
young MSCs	mmu-miR-324-3p-002509	Target	29.6442	1.02268	29.6442	7.75998	21.8842	0.151542	-1.39917	2.63749
young MSCs	mmu-miR-351-001067	Target	Undetermined	0.0427723	40	18.1158	21.8842	0.151542	3.59605	0.0826952
young MSCs	rno-miR-381-001322	Target	28.9974	1.96245	28.9974	7.11317	21.8842	0.151542	-2.73207	6.6441
young MSCs	rno-miR-409-5p-001317	Target	Undetermined	0.00239408	40	18.1158	21.8842	0.151542
young MSCs	rno-miR-450a-001345	Target	Undetermined	0.0462047	40	18.1158	21.8842	0.151542	2.37882	0.192266
young MSCs	mmu-miR-452-001032	Target	Undetermined	-0.00793174	40	18.1158	21.8842	0.151542
young MSCs	mmu-miR-464-001081	Target	Undetermined	6.24657e-05	40	18.1158	21.8842	0.151542
young MSCs	mmu-miR-467b-001671	Target	32.2842	0.592111	32.2842	10.4001	21.8842	0.151542	1.48032	0.358409
young MSCs	mmu-miR-468-001085	Target	Undetermined	0.00627786	40	18.1158	21.8842	0.151542
young MSCs	mmu-miR-469-001086	Target	Undetermined	0.00506681	40	18.1158	21.8842	0.151542
young MSCs	mmu-miR-488-001659	Target	Undetermined	0.0166191	40	18.1158	21.8842	0.151542
young MSCs	mmu-miR-490-001037	Target	Undetermined	0.0159526	40	18.1158	21.8842	0.151542
young MSCs	mmu-miR-496-001953	Target	32.4186	1.36437	32.4186	10.5344	21.8842	0.151542	-9.70739	836.017
young MSCs	rno-miR-505-001316	Target	Undetermined	-0.000374019	40	18.1158	21.8842	0.151542
young MSCs	mmu-miR-546-001312	Target	Undetermined	0.0595539	40	18.1158	21.8842	0.151542
young MSCs	mmu-miR-547-002564	Target	Undetermined	0.0299083	40	18.1158	21.8842	0.151542
young MSCs	mmu-miR-652-002352	Target	28.5503	2.14827	28.5503	6.66616	21.8842	0.151542	0.500126	0.707045
young MSCs	mmu-miR-667-001949	Target	28.3769	1.66834	28.3769	6.49277	21.8842	0.151542	-5.97319	62.8216
young MSCs	mmu-miR-668-001947	Target	Undetermined	0.0191976	40	18.1158	21.8842	0.151542
young MSCs	mmu-miR-670-002020	Target	Undetermined	0.00648081	40	18.1158	21.8842	0.151542
young MSCs	mmu-miR-675-3p-001941	Target	Undetermined	0.00612074	40	18.1158	21.8842	0.151542
young MSCs	mmu-miR-675-5p-001940	Target	Undetermined	0.0107602	40	18.1158	21.8842	0.151542
young MSCs	mmu-miR-676-001959	Target	32.6052	0.789215	32.6052	10.721	21.8842	0.151542	-1.07247	2.10303
young MSCs	mmu-miR-677-001660	Target	38.073	0.369448	38.073	16.1889	21.8842	0.151542	-2.49894	5.65271
young MSCs	mmu-miR-679-001662	Target	Undetermined	0.00920826	40	18.1158	21.8842	0.151542
young MSCs	mmu-miR-680-001664	Target	Undetermined	0.0384002	40	18.1158	21.8842	0.151542	1.98887	0.251936
young MSCs	mmu-miR-682-001666	Target	29.134	1.61396	29.134	7.24984	21.8842	0.151542	-9.27213	618.286
young MSCs	mmu-miR-683-001668	Target	Undetermined	0.00793159	40	18.1158	21.8842	0.151542
young MSCs	mmu-miR-684-001669	Target	Undetermined	4.76837e-05	40	18.1158	21.8842	0.151542
young MSCs	mmu-miR-685-001670	Target	26.4025	2.43273	26.4025	4.51836	21.8842	0.151542	-5.98002	63.1198
young MSCs	mmu-miR-686-001672	Target	Undetermined	0.00599736	40	18.1158	21.8842	0.151542
young MSCs	mmu-miR-687-001674	Target	Undetermined	0.0256173	40	18.1158	21.8842	0.151542
young MSCs	mmu-let-7a-000377	Target	31.3154	0.568778	31.3154	9.43126	21.8842	0.151542	1.75845	0.295566
young MSCs	mmu-let-7f-000382	Target	Undetermined	0.0367476	40	18.1158	21.8842	0.151542	7.90739	0.00416523
young MSCs	mmu-miR-106b-000442	Target	26.9122	3.42417	26.9122	5.02799	21.8842	0.151542	0.152464	0.899713
young MSCs	mmu-miR-155-002571	Target	25.7191	3.54973	25.7191	3.83494	21.8842	0.151542	-0.14257	1.10387
young MSCs	mmu-miR-17-002308	Target	22.4262	2.60561	22.4262	0.541983	21.8842	0.151542	-0.0888157	1.0635
young MSCs	mmu-miR-23a-000399	Target	Undetermined	0.0419733	40	18.1158	21.8842	0.151542
young MSCs	mmu-miR-29a-002112	Target	21.7735	3.38834	21.7735	-0.110634	21.8842	0.151542	-4.25088	19.0389
young MSCs	mmu-miR-30a-000417	Target	25.4702	3.55066	25.4702	3.58602	21.8842	0.151542	-1.26484	2.40301
young MSCs	mmu-miR-30e-002223	Target	26.7569	3.62804	26.7569	4.87276	21.8842	0.151542	-0.509977	1.42403
young MSCs	mmu-miR-31-000185	Target	22.1827	3.62323	22.1827	0.298515	21.8842	0.151542	-6.90456	119.806
young MSCs	mmu-miR-34b-3p-002618	Target	24.8211	3.75959	24.8211	2.93695	21.8842	0.151542	-8.86433	466.047
young MSCs	mmu-miR-92a-000430	Target	22.4717	4.73109	22.4717	0.587496	21.8842	0.151542	0.745701	0.596378
young MSCs	rno-miR-190b-002048	Target	14.2379	0.772517	14.2379	-7.64632	21.8842	0.151542	-4.0106	16.1179
young MSCs	mmu-miR-129-5p-000590	Target	35.4314	0.381034	35.4314	13.5472	21.8842	0.151542	-6.69458	103.578
young MSCs	mmu-miR-187-001193	Target	Undetermined	0.00955516	40	18.1158	21.8842	0.151542
young MSCs	mmu-miR-188-3p-002106	Target	Undetermined	0.00164735	40	18.1158	21.8842	0.151542
young MSCs	mmu-miR-106a-002459	Target	22.4146	2.35654	22.4146	0.530392	21.8842	0.151542	-0.271902	1.2074
young MSCs	mmu-miR-188-5p-002320	Target	27.3734	2.90029	27.3734	5.48925	21.8842	0.151542	-1.97468	3.93041
young MSCs	mmu-miR-302b-000531	Target	Undetermined	0.0397338	40	18.1158	21.8842	0.151542
young MSCs	mmu-miR-322-001076	Target	29.4684	1.82781	29.4684	7.58423	21.8842	0.151542	0.914681	0.530461
young MSCs	hsa-miR-136#-002100	Target	35.0362	0.38987	35.0362	13.3272	21.709	0.106876	-7.15947	142.96
young MSCs	hsa-miR-30c-1#-002108	Target	Undetermined	0.000659853	40	18.291	21.709	0.106876
young MSCs	hsa-miR-30c-2#-002110	Target	Undetermined	0.0101358	40	18.291	21.709	0.106876
young MSCs	hsa-miR-148a#-002134	Target	Undetermined	0.0126057	40	18.291	21.709	0.106876
young MSCs	hsa-miR-33a#-002136	Target	Undetermined	0.00926498	40	18.291	21.709	0.106876	-1.7027	3.2551
young MSCs	hsa-miR-93#-002139	Target	26.9716	4.98513	26.9716	5.26264	21.709	0.106876	-0.10677	1.07681
young MSCs	hsa-miR-29b-2#-002166	Target	Undetermined	0.011576	40	18.291	21.709	0.106876
young MSCs	hsa-let-7i#-002172	Target	34.5968	1.2235	34.5968	12.8878	21.709	0.106876	-3.79979	13.9268
young MSCs	hsa-miR-15b#-002173	Target	Undetermined	0.00577539	40	18.291	21.709	0.106876
young MSCs	hsa-miR-27b#-002174	Target	32.0034	1.57125	32.0034	10.2945	21.709	0.106876	-7.91073	240.64
young MSCs	Mamm U6-001973	Endogenous Control	21.9305	2.86821	21.709		21.709	0.106876
young MSCs	Mamm U6-001973	Endogenous Control	21.7678	3.21648	21.709		21.709	0.106876
young MSCs	hsa-miR-935-002178	Target	Undetermined	-0.00137508	40	18.291	21.709	0.106876
young MSCs	hsa-miR-99b#-002196	Target	33.1716	1.16012	33.1716	11.4627	21.709	0.106876	-7.34768	162.881
young MSCs	hsa-miR-124#-002197	Target	Undetermined	0.000588089	40	18.291	21.709	0.106876
young MSCs	hsa-miR-127-5p-002229	Target	Undetermined	0.00524056	40	18.291	21.709	0.106876
young MSCs	hsa-miR-9#-002231	Target	32.2834	1.64451	32.2834	10.5745	21.709	0.106876	-9.9122	963.539
young MSCs	hsa-miR-140-3p-002234	Target	28.6484	2.56795	28.6484	6.93945	21.709	0.106876	-2.54158	5.82228
young MSCs	hsa-miR-411#-002238	Target	31.8739	1.37292	31.8739	10.1649	21.709	0.106876	-10.3217	1279.82
young MSCs	hsa-miR-149-002255	Target	25.2992	3.38678	25.2992	3.59019	21.709	0.106876	-4.74226	26.7647
young MSCs	hsa-miR-378-000567	Target	27.7747	4.57662	27.7747	6.06569	21.709	0.106876	-2.66476	6.34124
young MSCs	hsa-miR-200a#-001011	Target	Undetermined	0.0188565	40	18.291	21.709	0.106876
young MSCs	mmu-miR-10b-001181	Target	30.2842	3.5316	30.2842	8.57521	21.709	0.106876	-11.9115	3852.18
young MSCs	hsa-miR-340-000550	Target	29.6468	4.18855	29.6468	7.93782	21.709	0.106876	-1.26504	2.40333
young MSCs	hsa-miR-338-000548	Target	Undetermined	0.0187843	40	18.291	21.709	0.106876
young MSCs	hsa-miR-324-3p-000579	Target	27.2619	1.54	27.2619	5.5529	21.709	0.106876	-3.32615	10.0293
young MSCs	hsa-miR-30e-3p-000422	Target	24.2956	5.98266	24.2956	2.58665	21.709	0.106876	-3.29276	9.79987
young MSCs	hsa-miR-30a-3p-000416	Target	24.8795	6.05003	24.8795	3.17059	21.709	0.106876	-3.96635	15.6312
young MSCs	hsa-miR-223-000526	Target	29.9747	1.19226	29.9747	8.26578	21.709	0.106876	8.73279	0.00235054
young MSCs	hsa-miR-22-000398	Target	27.3	1.62446	27.3	5.59103	21.709	0.106876	-14.8956	30481.4
young MSCs	hsa-miR-214-000517	Target	21.6695	5.06094	21.6695	-0.0394974	21.709	0.106876	-11.6183	3143.72
young MSCs	hsa-miR-213-000516	Target	34.7278	0.48619	34.7278	13.0188	21.709	0.106876	1.02334	0.491974
young MSCs	hsa-miR-200c-000505	Target	29.6312	2.11427	29.6312	7.92223	21.709	0.106876	-1.29532	2.45432
young MSCs	hsa-miR-143-000466	Target	13.6326	1.66375	13.6326	-8.07639	21.709	0.106876	-2.00656	4.01823
young MSCs	Mamm U6-001973	Endogenous Control	21.4184	3.34844	21.709		21.709	0.106876
young MSCs	Mamm U6-001973	Endogenous Control	21.7191	3.19792	21.709		21.709	0.106876
young MSCs	hsa-miR-136-000592	Target	39.2429	0.257695	39.2429	17.5339	21.709	0.106876	-2.95276	7.74231
young MSCs	hsa-miR-299-5p-000600	Target	Undetermined	0.0483782	40	18.291	21.709	0.106876
young MSCs	hsa-miR-412-001023	Target	Undetermined	-0.00670421	40	18.291	21.709	0.106876
young MSCs	hsa-miR-425-001104	Target	32.7041	0.650421	32.7041	10.9951	21.709	0.106876	-2.00694	4.01929
young MSCs	mmu-miR-295#-002596	Target	Undetermined	0.00852707	40	18.291	21.709	0.106876
young MSCs	rno-miR-504-007334	Target	Undetermined	0.00221318	40	18.291	21.709	0.106876
young MSCs	mmu-miR-1224-240985_mat	Target	Undetermined	0.00871354	40	18.291	21.709	0.106876
young MSCs	hsa-miR-363#-001283	Target	Undetermined	0.017039	40	18.291	21.709	0.106876
young MSCs	mmu-miR-217-001133	Target	Undetermined	0.0270786	40	18.291	21.709	0.106876
young MSCs	mmu-miR-291-3p-001135	Target	Undetermined	0.0101308	40	18.291	21.709	0.106876
young MSCs	mmu-miR-291-5p-001202	Target	Undetermined	0.0117653	40	18.291	21.709	0.106876
young MSCs	mmu-miR-292-3p-001054	Target	Undetermined	0.0250424	40	18.291	21.709	0.106876
young MSCs	mmu-miR-292-5p-001055	Target	Undetermined	0.014596	40	18.291	21.709	0.106876
young MSCs	mmu-miR-300-000191	Target	Undetermined	0.0360597	40	18.291	21.709	0.106876
young MSCs	mmu-miR-322-001059	Target	Undetermined	0.0518344	40	18.291	21.709	0.106876	7.34114	0.00616731
young MSCs	mmu-miR-325-001060	Target	Undetermined	0.014371	40	18.291	21.709	0.106876
young MSCs	mmu-miR-326-001061	Target	Undetermined	0.0153999	40	18.291	21.709	0.106876	-1.65045	3.13932
young MSCs	mmu-miR-330-001062	Target	Undetermined	0.00498247	40	18.291	21.709	0.106876
young MSCs	mmu-miR-337-000193	Target	29.5457	4.84607	29.5457	7.83676	21.709	0.106876	-12.6499	6426.93
young MSCs	mmu-miR-345-001137	Target	32.555	1.99577	32.555	10.846	21.709	0.106876	-2.38931	5.23907
young MSCs	mmu-miR-370-001068	Target	Undetermined	0.0123891	40	18.291	21.709	0.106876
young MSCs	mmu-miR-433-5p-001078	Target	Undetermined	0.0242824	40	18.291	21.709	0.106876
young MSCs	rno-miR-513-241072_mat	Target	Undetermined	-0.00380063	40	18.291	21.709	0.106876
young MSCs	hsa-miR-200b-001800	Target	37.9075	0.295999	37.9075	16.1985	21.709	0.106876	5.03589	0.0304821
young MSCs	mmu-miR-483-001291	Target	Undetermined	0.00343025	40	18.291	21.709	0.106876
young MSCs	mmu-miR-494-001293	Target	Undetermined	0.00727612	40	18.291	21.709	0.106876
young MSCs	mmu-miR-302b#-001307	Target	Undetermined	0.00199962	40	18.291	21.709	0.106876
young MSCs	mmu-miR-374-5p-001319	Target	29.8853	0.63484	29.8853	8.17635	21.709	0.106876	1.19258	0.437519
young MSCs	mmu-miR-695-001627	Target	Undetermined	0.00299507	40	18.291	21.709	0.106876
young MSCs	mmu-miR-696-001628	Target	30.7587	0.582096	30.7587	9.04971	21.709	0.106876	-11.437	2772.48
young MSCs	mmu-miR-720-001629	Target	19.8922	4.778	19.8922	-1.81675	21.709	0.106876	-3.70269	13.0203
young MSCs	mmu-miR-698-001632	Target	Undetermined	0.00487745	40	18.291	21.709	0.106876
young MSCs	mmu-miR-700-001634	Target	29.8897	1.25513	29.8897	8.18075	21.709	0.106876	-4.96986	31.3384
young MSCs	mmu-miR-701-001635	Target	Undetermined	0.00517011	40	18.291	21.709	0.106876
young MSCs	mmu-miR-702-001636	Target	Undetermined	0.0638948	40	18.291	21.709	0.106876
young MSCs	mmu-miR-133a#-001637	Target	Undetermined	0.0339324	40	18.291	21.709	0.106876
young MSCs	mmu-miR-706-001641	Target	26.8931	2.77565	26.8931	5.1841	21.709	0.106876	-4.01774	16.1979
young MSCs	mmu-miR-710-001645	Target	Undetermined	0.0144019	40	18.291	21.709	0.106876
young MSCs	mmu-miR-711-001646	Target	Undetermined	-0.000302613	40	18.291	21.709	0.106876
young MSCs	mmu-miR-713-001648	Target	Undetermined	0.000990987	40	18.291	21.709	0.106876
young MSCs	mmu-miR-715-001649	Target	33.8349	0.373366	33.8349	12.1259	21.709	0.106876	-8.36076	328.73
young MSCs	mmu-miR-717-001652	Target	Undetermined	0.014127	40	18.291	21.709	0.106876
young MSCs	mmu-miR-718-001656	Target	Undetermined	0.0181914	40	18.291	21.709	0.106876
young MSCs	mmu-miR-721-001657	Target	Undetermined	0.030111	40	18.291	21.709	0.106876
young MSCs	mmu-miR-690-001677	Target	22.3064	3.5844	22.3064	0.597475	21.709	0.106876	-7.05812	133.262
young MSCs	mmu-miR-691-001678	Target	Undetermined	0.00653428	40	18.291	21.709	0.106876
young MSCs	snoRNA135-001230	Target	24.3449	4.00537	24.3449	2.63597	21.709	0.106876	-0.234032	1.17612
young MSCs	mmu-miR-692-001679	Target	28.0323	0.947816	28.0323	6.3233	21.709	0.106876	-14.1634	18348.4
young MSCs	mmu-miR-693-001680	Target	Undetermined	-0.00158328	40	18.291	21.709	0.106876
young MSCs	mmu-miR-694-001681	Target	31.8872	0.703209	31.8872	10.1782	21.709	0.106876	-1.13769	2.20029
young MSCs	mmu-miR-467b-001684	Target	29.8372	2.11825	29.8372	8.12823	21.709	0.106876	-2.24091	4.72696
young MSCs	rno-miR-664-001323	Target	26.5473	4.60574	26.5473	4.8383	21.709	0.106876	-1.68983	3.2262
young MSCs	rno-miR-20b-001326	Target	34.7792	0.413671	34.7792	13.0702	21.709	0.106876	5.07012	0.0297674
young MSCs	rno-miR-20a#-001336	Target	Undetermined	0.00381568	40	18.291	21.709	0.106876
young MSCs	rno-miR-350-001337	Target	29.0885	2.90447	29.0885	7.37955	21.709	0.106876	-9.84579	920.192
young MSCs	rno-miR-489-001353	Target	31.547	0.763993	31.547	9.83803	21.709	0.106876	-2.80878	7.00694
young MSCs	rno-miR-382#-001354	Target	Undetermined	0.0509595	40	18.291	21.709	0.106876
young MSCs	rno-miR-29c#-001818	Target	Undetermined	0.00783914	40	18.291	21.709	0.106876
young MSCs	hsa-miR-26b#-002444	Target	Undetermined	0.0350931	40	18.291	21.709	0.106876	1.93333	0.261824
young MSCs	hsa-miR-27a#-002445	Target	28.0115	3.10491	28.0115	6.30256	21.709	0.106876	-5.63906	49.834
young MSCs	hsa-miR-28-3p-002446	Target	Undetermined	0.050324	40	18.291	21.709	0.106876
young MSCs	hsa-miR-29a#-002447	Target	29.7416	3.72428	29.7416	8.03262	21.709	0.106876	-12.454	5611.02
young MSCs	mmu-miR-488#-002014	Target	Undetermined	0.00988466	40	18.291	21.709	0.106876
young MSCs	mmu-miR-758-002025	Target	Undetermined	0.0124918	40	18.291	21.709	0.106876
young MSCs	mmu-miR-762-002028	Target	Undetermined	0.0126062	40	18.291	21.709	0.106876
young MSCs	mmu-miR-761-002030	Target	Undetermined	0.005696	40	18.291	21.709	0.106876
young MSCs	mmu-miR-764-3p-002032	Target	Undetermined	0.00464672	40	18.291	21.709	0.106876
young MSCs	mmu-miR-763-002033	Target	34.5271	0.431819	34.5271	12.8181	21.709	0.106876	-7.66856	203.454
young MSCs	mmu-miR-759-002034	Target	Undetermined	0.0123249	40	18.291	21.709	0.106876
young MSCs	mmu-miR-693-3p-002036	Target	Undetermined	0.0167904	40	18.291	21.709	0.106876
young MSCs	hsa-miR-23a#-002439	Target	Undetermined	0.00593829	40	18.291	21.709	0.106876
young MSCs	mmu-miR-374#-002043	Target	Undetermined	0.0456113	40	18.291	21.709	0.106876
young MSCs	mmu-miR-804-002044	Target	34.9589	0.616954	34.9589	13.2499	21.709	0.106876	-7.23676	150.828
young MSCs	mmu-miR-805-002045	Target	23.9708	5.41869	23.9708	2.26184	21.709	0.106876	-3.66236	12.6614
young MSCs	mmu-miR-666-3p-002448	Target	Undetermined	0.0101853	40	18.291	21.709	0.106876
young MSCs	mmu-miR-673-3p-002449	Target	Undetermined	0.0414532	40	18.291	21.709	0.106876
young MSCs	mmu-miR-376b#-002451	Target	28.8608	5.08032	28.8608	7.15188	21.709	0.106876	-13.3348	10331.7
young MSCs	mmu-miR-146b#-002453	Target	Undetermined	0.00880098	40	18.291	21.709	0.106876
young MSCs	mmu-miR-742#-002458	Target	Undetermined	-0.00245666	40	18.291	21.709	0.106876
young MSCs	mmu-miR-130b#-002460	Target	31.1106	1.44464	31.1106	9.40168	21.709	0.106876	2.27442	0.206695
young MSCs	mmu-miR-879#-002473	Target	Undetermined	0.00570974	40	18.291	21.709	0.106876
young MSCs	mmu-miR-881#-002475	Target	26.932	0.858285	26.932	5.22301	21.709	0.106876	0.146547	0.90341
young MSCs	mmu-miR-196a#-002477	Target	21.7466	0.835454	21.7466	0.0376129	21.709	0.106876	-2.31992	4.99303
young MSCs	mmu-let-7a#-002478	Target	30.612	2.83503	30.612	8.90306	21.709	0.106876	-11.5836	3069.12
young MSCs	mmu-let-7c-1#-002479	Target	31.5563	3.29299	31.5563	9.84736	21.709	0.106876	-3.44116	10.8616
young MSCs	mmu-miR-327-002481	Target	37.8201	0.281321	37.8201	16.1112	21.709	0.106876	-4.37551	20.7568
young MSCs	mmu-miR-376a#-002482	Target	31.9665	1.58628	31.9665	10.2575	21.709	0.106876	-10.2291	1200.26
young MSCs	mmu-miR-343-002483	Target	Undetermined	0.00215545	40	18.291	21.709	0.106876
young MSCs	mmu-miR-16#-002489	Target	32.5293	2.14297	32.5293	10.8204	21.709	0.106876	-1.52816	2.88419
young MSCs	mmu-miR-18a#-002490	Target	31.3059	1.75669	31.3059	9.59694	21.709	0.106876	-0.83127	1.77925
young MSCs	mmu-miR-20a#-002491	Target	33.763	0.461193	33.763	12.054	21.709	0.106876	2.64183	0.160225
young MSCs	mmu-miR-24-2#-002494	Target	27.0963	2.77971	27.0963	5.38734	21.709	0.106876	-6.44906	87.3699
young MSCs	mmu-miR-31#-002495	Target	26.1119	4.17697	26.1119	4.40293	21.709	0.106876	-8.01778	259.174
young MSCs	mmu-miR-92a#-002496	Target	Undetermined	0.00554419	40	18.291	21.709	0.106876	5.12308	0.0286946
young MSCs	snoRNA202-001232	Target	20.8466	5.54847	20.8466	-0.862358	21.709	0.106876	0.264099	0.832719
young MSCs	mmu-miR-29b#-002497	Target	26.2233	6.33589	26.2233	4.5143	21.709	0.106876	-2.48304	5.59073
young MSCs	mmu-miR-30b#-002498	Target	Undetermined	0.0459881	40	18.291	21.709	0.106876
young MSCs	mmu-miR-322#-002506	Target	33.4153	0.654057	33.4153	11.7063	21.709	0.106876	-0.433243	1.35027
young MSCs	mmu-miR-101a#-002507	Target	Undetermined	-0.00695246	40	18.291	21.709	0.106876
young MSCs	mmu-miR-125b#-002508	Target	36.5442	0.435931	36.5442	14.8353	21.709	0.106876	-1.08983	2.12849
young MSCs	mmu-miR-136#-002512	Target	34.2322	1.26805	34.2322	12.5232	21.709	0.106876	-7.96347	249.6
young MSCs	mmu-miR-141#-002513	Target	Undetermined	0.0638526	40	18.291	21.709	0.106876
young MSCs	mmu-miR-145#-002514	Target	Undetermined	0.00181442	40	18.291	21.709	0.106876
young MSCs	mmu-miR-376c#-002523	Target	Undetermined	0.00817937	40	18.291	21.709	0.106876
young MSCs	mmu-miR-20b#-002524	Target	Undetermined	0.0174602	40	18.291	21.709	0.106876
young MSCs	mmu-miR-450a-3p-002525	Target	Undetermined	0.00628305	40	18.291	21.709	0.106876
young MSCs	mmu-miR-101b-002531	Target	32.5883	1.52671	32.5883	10.8794	21.709	0.106876	0.0176802	0.98782
young MSCs	mmu-miR-291b-3p-002538	Target	Undetermined	0.0170723	40	18.291	21.709	0.106876
young MSCs	mmu-miR-878-3p-002541	Target	30.9322	1.09472	30.9322	9.22329	21.709	0.106876	-4.52497	23.0224
young MSCs	mmu-miR-872#-002542	Target	28.5132	3.84263	28.5132	6.80426	21.709	0.106876	-2.23349	4.7027
young MSCs	mmu-miR-17#-002543	Target	36.7677	0.32793	36.7677	15.0588	21.709	0.106876	3.20917	0.108129
young MSCs	mmu-miR-19a#-002544	Target	Undetermined	0.00119472	40	18.291	21.709	0.106876
young MSCs	mmu-miR-28#-002545	Target	30.2765	0.668367	30.2765	8.56757	21.709	0.106876	-11.9191	3872.62
young MSCs	mmu-miR-877#-002548	Target	11.4462	2.22082	11.4462	-10.2627	21.709	0.106876	-1.2221	2.33285
young MSCs	mmu-miR-212-002551	Target	25.771	3.63084	25.771	4.06202	21.709	0.106876	-7.78704	220.869
young MSCs	mmu-miR-138#-002554	Target	36.3871	0.425416	36.3871	14.6782	21.709	0.106876	-5.80848	56.0438
young MSCs	mmu-miR-302c#-002557	Target	Undetermined	0.0113293	40	18.291	21.709	0.106876
young MSCs	mmu-miR-483#-002560	Target	Undetermined	0.0134126	40	18.291	21.709	0.106876
young MSCs	mmu-miR-541-002562	Target	30.6958	3.10001	30.6958	8.98683	21.709	0.106876	-11.4998	2896
young MSCs	mmu-miR-467e#-002569	Target	Undetermined	0.0112115	40	18.291	21.709	0.106876
young MSCs	mmu-miR-10b#-002572	Target	33.3686	0.982576	33.3686	11.6597	21.709	0.106876	-5.20026	36.765
young MSCs	mmu-miR-186#-002574	Target	30.5401	4.69444	30.5401	8.83113	21.709	0.106876	-3.16714	8.98266
young MSCs	mmu-miR-412-002575	Target	31.8805	0.855252	31.8805	10.1715	21.709	0.106876	-10.3152	1274.01
young MSCs	mmu-miR-191#-002576	Target	33.1425	2.52722	33.1425	11.4335	21.709	0.106876	-9.05315	531.214
young MSCs	mmu-miR-193#-002577	Target	26.344	5.12071	26.344	4.63502	21.709	0.106876	-6.37856	83.2028
young MSCs	mmu-miR-203#-002580	Target	Undetermined	0.00617701	40	18.291	21.709	0.106876
young MSCs	mmu-miR-463#-002582	Target	32.8104	1.08444	32.8104	11.1014	21.709	0.106876	-2.81982	7.06074
young MSCs	mmu-miR-34c#-002584	Target	31.2075	1.5852	31.2075	9.49856	21.709	0.106876	-10.9881	2031.2
young MSCs	mmu-miR-466a-3p-002586	Target	30.7374	1.40102	30.7374	9.02848	21.709	0.106876	-3.80202	13.9484
young MSCs	mmu-miR-470#-002589	Target	34.8825	0.558685	34.8825	13.1735	21.709	0.106876	-2.63007	6.19056
young MSCs	mmu-miR-290-5p-002590	Target	Undetermined	0.00253624	40	18.291	21.709	0.106876
young MSCs	mmu-miR-293#-002594	Target	Undetermined	0.0184733	40	18.291	21.709	0.106876
young MSCs	hsa-miR-455-001280	Target	35.6856	0.480299	35.6856	13.9767	21.709	0.106876	-6.51001	91.14
young MSCs	hsa-miR-493-3p-001282	Target	32.5188	0.436346	32.5188	10.8099	21.709	0.106876	-9.67682	818.49
young MSCs	hsa-miR-376a#-001287	Target	32.0476	2.45768	32.0476	10.3387	21.709	0.106876	-10.148	1134.62
young MSCs	mmu-let-7d#-001178	Target	Undetermined	0.0108592	40	18.291	21.709	0.106876
young MSCs	mmu-miR-543-001298	Target	29.5372	1.69549	29.5372	7.82822	21.709	0.106876	-12.6585	6465.07
young MSCs	mmu-miR-487b-001306	Target	30.3294	2.75448	30.3294	8.62041	21.709	0.106876	-11.8663	3733.37
young MSCs	mmu-miR-1933-5p-121133_mat	Target	Undetermined	0.0179016	40	18.291	21.709	0.106876
young MSCs	mmu-miR-449b-001667	Target	Undetermined	0.0317342	40	18.291	21.709	0.106876
young MSCs	mmu-miR-719-001673	Target	Undetermined	0.0202752	40	18.291	21.709	0.106876
young MSCs	mmu-miR-688-001675	Target	Undetermined	0.0147076	40	18.291	21.709	0.106876
young MSCs	U87-001712	Target	26.3599	3.46885	26.3599	4.6509	21.709	0.106876	-0.30179	1.23267
young MSCs	mmu-miR-467a-001826	Target	25.2956	1.28523	25.2956	3.58667	21.709	0.106876	-2.73028	6.63584
young MSCs	mmu-miR-485-3p-001943	Target	26.8483	3.84105	26.8483	5.13929	21.709	0.106876	-10.9529	1982.28
young MSCs	mmu-miR-673-001954	Target	9.90063	2.83304	9.90063	-11.8083	21.709	0.106876	-1.89468	3.71841
young MSCs	mmu-miR-674#-001956	Target	27.2679	5.00104	27.2679	5.55894	21.709	0.106876	-4.31055	19.8429
young MSCs	mmu-miR-676#-001958	Target	32.596	1.61634	32.596	10.887	21.709	0.106876	-5.94195	61.4761
young MSCs	mmu-miR-712#-001961	Target	Undetermined	0.0129988	40	18.291	21.709	0.106876
young MSCs	hsa-miR-190b-002263	Target	30.7922	5.33935	30.7922	9.08327	21.709	0.106876	-2.09963	4.286
young MSCs	hsa-miR-183#-002270	Target	34.3375	0.742	34.3375	12.6286	21.709	0.106876	-7.85808	232.016
young MSCs	hsa-miR-200c#-002286	Target	Undetermined	0.011746	40	18.291	21.709	0.106876
young MSCs	hsa-miR-10a#-002288	Target	Undetermined	0.0190445	40	18.291	21.709	0.106876
young MSCs	hsa-miR-214#-002293	Target	27.1427	4.01313	27.1427	5.43374	21.709	0.106876	-15.0529	33992.6
young MSCs	hsa-miR-218-2#-002294	Target	Undetermined	-0.00153905	40	18.291	21.709	0.106876
young MSCs	hsa-miR-22#-002301	Target	33.495	0.823368	33.495	11.786	21.709	0.106876	-8.70067	416.065
young MSCs	hsa-miR-30d#-002305	Target	31.9376	1.04672	31.9376	10.2286	21.709	0.106876	-1.03585	2.05032
young MSCs	hsa-miR-431#-002312	Target	Undetermined	0.00778019	40	18.291	21.709	0.106876
young MSCs	hsa-miR-744#-002325	Target	34.1704	0.929938	34.1704	12.4614	21.709	0.106876	-3.21629	9.29393
young MSCs	hsa-miR-708#-002342	Target	Undetermined	-0.0084455	40	18.291	21.709	0.106876
young MSCs	hsa-miR-106b#-002380	Target	29.6919	2.09316	29.6919	7.98293	21.709	0.106876	-0.252235	1.19105
young MSCs	hsa-let-7b#-002404	Target	Undetermined	0.0336583	40	18.291	21.709	0.106876
young MSCs	hsa-let-7e#-002407	Target	Undetermined	0.00423604	40	18.291	21.709	0.106876
young MSCs	mmu-miR-450B-3P-002632	Target	33.5653	1.56937	33.5653	11.8563	21.709	0.106876	1.09433	0.468354
young MSCs	mmu-miR-712-002636	Target	24.5986	5.30955	24.5986	2.8896	21.709	0.106876	-3.9053	14.9834
young MSCs	mmu-miR-465C-5P-002654	Target	31.8133	0.905725	31.8133	10.1043	21.709	0.106876	-3.97256	15.6986
young MSCs	mmu-miR-463-002662	Target	32.2968	2.31429	32.2968	10.5879	21.709	0.106876	-4.24202	18.9224
young MSCs	mmu-miR-880-002665	Target	Undetermined	0.0179331	40	18.291	21.709	0.106876
young MSCs	mmu-miR-883B-5P-002669	Target	Undetermined	0.000734091	40	18.291	21.709	0.106876
young MSCs	mmu-miR-181A-2#-002687	Target	Undetermined	0.00622904	40	18.291	21.709	0.106876
young MSCs	mmu-miR-466E-5P-002718	Target	33.605	0.415262	33.605	11.8961	21.709	0.106876	-1.06656	2.09444
young MSCs	mmu-miR-669E-002774	Target	Undetermined	0.00323319	40	18.291	21.709	0.106876
young MSCs	mmu-miR-1198-002780	Target	Undetermined	0.0405058	40	18.291	21.709	0.106876	4.42866	0.0464346
young MSCs	mmu-miR-1193-002794	Target	31.8534	1.67209	31.8534	10.1444	21.709	0.106876	-10.3422	1298.14
young MSCs	mmu-miR-1192-002806	Target	Undetermined	0.0134425	40	18.291	21.709	0.106876
young MSCs	mmu-miR-669D-002808	Target	32.6411	0.862978	32.6411	10.9322	21.709	0.106876	-9.55451	751.957
young MSCs	mmu-miR-467H-002809	Target	Undetermined	0.0838887	40	18.291	21.709	0.106876
young MSCs	mmu-miR-466J-002817	Target	33.3529	0.627984	33.3529	11.644	21.709	0.106876	-0.889977	1.85315
young MSCs	mmu-miR-1195-002839	Target	33.7033	0.397695	33.7033	11.9944	21.709	0.106876	-8.49231	360.113
young MSCs	mmu-miR-1188-002866	Target	Undetermined	0.0988544	40	18.291	21.709	0.106876	22.1011	2.2229e-07
young MSCs	mmu-miR-1-2-AS-002882	Target	34.5948	0.793726	34.5948	12.8858	21.709	0.106876	-1.3617	2.56989
young MSCs	mmu-miR-467F-002886	Target	26.6092	1.14098	26.6092	4.90026	21.709	0.106876	-2.56698	5.92568
young MSCs	mmu-miR-669H-5P-002906	Target	Undetermined	0.0127679	40	18.291	21.709	0.106876
young MSCs	rno-miR-880-002666	Target	Undetermined	0.0064885	40	18.291	21.709	0.106876
young MSCs	rno-miR-409-3P-002679	Target	25.5738	4.42712	25.5738	3.86488	21.709	0.106876	-11.6564	3227.98
young MSCs	rno-miR-146B-002755	Target	27.1385	6.09275	27.1385	5.42957	21.709	0.106876	0.0433426	0.970404
young MSCs	hsa-miR-423-3P-002626	Target	27.371	2.54439	27.371	5.66206	21.709	0.106876	-1.51531	2.85861
young MSCs	hsa-miR-151-5P-002642	Target	Undetermined	0.0173091	40	18.291	21.709	0.106876
young MSCs	hsa-miR-338-5P-002658	Target	27.7398	0.654098	27.7398	6.03083	21.709	0.106876	-10.1219	1114.29
young MSCs	hsa-miR-590-3P-002677	Target	Undetermined	0.0130177	40	18.291	21.709	0.106876
young MSCs	Y1-001727	Target	24.8532	2.8003	24.8532	3.14428	21.709	0.106876	-9.28267	622.819
young MSCs	hsa-miR-421-002700	Target	24.2918	5.74336	24.2918	2.58281	21.709	0.106876	-3.65789	12.6222
young MSCs	hsa-miR-1197-002810	Target	35.5548	0.583453	35.5548	13.8458	21.709	0.106876	-6.64083	99.7907
young MSCs	mmu-miR-471-002605	Target	Undetermined	-0.00252467	40	18.291	21.709	0.106876
young MSCs	mmu-miR-770-5p-002608	Target	Undetermined	0.00335741	40	18.291	21.709	0.106876
young MSCs	mmu-miR-882-002610	Target	Undetermined	-0.00134248	40	18.291	21.709	0.106876
young MSCs	mmu-miR-299-002612	Target	Undetermined	0.00458145	40	18.291	21.709	0.106876
young MSCs	mmu-miR-300#-002613	Target	Undetermined	0.00279719	40	18.291	21.709	0.106876
young MSCs	mmu-miR-362-5p-002614	Target	29.8555	3.18267	29.8555	8.14652	21.709	0.106876	-4.55628	23.5276
young MSCs	mmu-miR-34b-5p-002617	Target	Undetermined	0.00704587	40	18.291	21.709	0.106876
young MSCs	rno-miR-743a-002056	Target	31.4419	0.815702	31.4419	9.73295	21.709	0.106876	-7.72409	211.438
young MSCs	rno-miR-148b-5p-002058	Target	Undetermined	0.0509098	40	18.291	21.709	0.106876	5.68067	0.0194961
young MSCs	rno-miR-7a#-002062	Target	28.9758	1.23265	28.9758	7.26685	21.709	0.106876	-0.715372	1.64191
young MSCs	rno-miR-99a#-002073	Target	Undetermined	0.0140713	40	18.291	21.709	0.106876	3.64436	0.079972
young MSCs	rno-miR-125b#-002074	Target	Undetermined	0.0303965	40	18.291	21.709	0.106876
young MSCs	rno-miR-135a#-002075	Target	Undetermined	0.0407303	40	18.291	21.709	0.106876
young MSCs	rno-miR-204#-002076	Target	Undetermined	0.00440258	40	18.291	21.709	0.106876
young MSCs	rno-miR-24-1#-002079	Target	Undetermined	-0.00297642	40	18.291	21.709	0.106876
young MSCs	rno-miR-25#-002080	Target	29.8813	0.439795	29.8813	8.17234	21.709	0.106876	-12.3143	5093.11
young MSCs	rno-miR-29b-1#-002082	Target	Undetermined	0.0126879	40	18.291	21.709	0.106876
young MSCs	hsa-miR-189-000488	Target	Undetermined	0.0215558	40	18.291	21.709	0.106876
young MSCs	rno-miR-666-241074_mat	Target	Undetermined	0.00349081	40	18.291	21.709	0.106876
young MSCs	rno-miR-547-241078_mat	Target	32.6985	0.486114	32.6985	10.9896	21.709	0.106876	-9.4971	722.625
young MSCs	mmu-miR-2138-241080_mat	Target	23.0017	2.606	23.0017	1.29274	21.709	0.106876	-8.14341	282.756
young MSCs	mmu-miR-767-241081_mat	Target	Undetermined	0.00404185	40	18.291	21.709	0.106876
young MSCs	mmu-miR-2146-241082_mat	Target	21.1419	3.54325	21.1419	-0.567022	21.709	0.106876	-4.92868	30.4566
young MSCs	rno-miR-105-241087_mat	Target	Undetermined	-0.0017243	40	18.291	21.709	0.106876
young MSCs	rno-miR-294-241093_mat	Target	Undetermined	-0.00468016	40	18.291	21.709	0.106876
young MSCs	mmu-miR-2183-241095_mat	Target	29.1664	1.86348	29.1664	7.45748	21.709	0.106876	-4.74039	26.7301
young MSCs	rno-miR-220-241101_mat	Target	Undetermined	0.0288399	40	18.291	21.709	0.106876
young MSCs	rno-miR-293-241102_mat	Target	Undetermined	-0.004058	40	18.291	21.709	0.106876
young MSCs	rno-miR-632-241110_mat	Target	9.09593	3.00274	9.09593	-12.613	21.709	0.106876	-4.37157	20.7002
young MSCs	mmu-miR-599-241117_mat	Target	Undetermined	0.0263911	40	18.291	21.709	0.106876
young MSCs	mmu-miR-2182-241119_mat	Target	21.5038	5.43826	21.5038	-0.205109	21.709	0.106876	-7.86028	232.37
young MSCs	mmu-miR-2134-241120_mat	Target	14.9851	5.75962	14.9851	-6.72383	21.709	0.106876	-4.27655	19.3807
young MSCs	rno-miR-653-241125_mat	Target	Undetermined	-0.001571	40	18.291	21.709	0.106876
young MSCs	mmu-miR-2139-241130_mat	Target	Undetermined	0.00197756	40	18.291	21.709	0.106876
young MSCs	rno-miR-465-241132_mat	Target	Undetermined	0.022137	40	18.291	21.709	0.106876
young MSCs	mmu-miR-2136-241133_mat	Target	Undetermined	0.0151562	40	18.291	21.709	0.106876
young MSCs	mmu-miR-432-241135_mat	Target	Undetermined	-0.0129069	40	18.291	21.709	0.106876
young MSCs	rno-miR-711-241136_mat	Target	Undetermined	0.0179559	40	18.291	21.709	0.106876
young MSCs	rno-miR-876-241138_mat	Target	Undetermined	0.0180842	40	18.291	21.709	0.106876
young MSCs	mmu-miR-2135-241140_mat	Target	23.4794	2.49765	23.4794	1.77044	21.709	0.106876	-4.72123	26.3773
young MSCs	hsa-miR-671-5p-197646_mat	Target	32.4628	3.71	32.4628	10.7538	21.709	0.106876	-7.71483	210.085
young MSCs	hsa-miR-144-002676	Target	Undetermined	0.0352459	40	18.291	21.709	0.106876
young MSCs	mmu-miR-15a#-002488	Target	33.1696	0.697368	33.1696	11.4606	21.709	0.106876	0.499807	0.707201
young MSCs	mmu-miR-503#-002536	Target	32.2474	2.4192	32.2474	10.5384	21.709	0.106876	0.494217	0.709947
young MSCs	mmu-miR-218-1#-002552	Target	34.5786	1.63316	34.5786	12.8697	21.709	0.106876	-7.61701	196.312
young MSCs	ath-miR159a-000338	Target	Undetermined	0.014486	40	18.291	21.709	0.106876
young MSCs	mmu-miR-150#-002570	Target	38.5784	0.270791	38.5784	16.8694	21.709	0.106876	-1.45851	2.74824
young MSCs	rno-miR-1#-001351	Target	Undetermined	0.00140184	40	18.291	21.709	0.106876
young MSCs	hsa-miR-200b#-002274	Target	Undetermined	-0.0072248	40	18.291	21.709	0.106876
young MSCs	hsa-miR-653-002292	Target	Undetermined	0.0133268	40	18.291	21.709	0.106876
young MSCs	mmu-miR-1191-002892	Target	34.5056	0.569196	34.5056	12.7966	21.709	0.106876	-3.62677	12.3528
young MSCs	rno-miR-379#-002081	Target	Undetermined	0.0336772	40	18.291	21.709	0.106876
young MSCs	mmu-miR-1904-121162_mat	Target	12.7315	2.44283	12.7315	-8.97745	21.709	0.106876	-4.14759	17.7235
young MSCs	mmu-miR-1941-3p-121130_mat	Target	Undetermined	0.0190327	40	18.291	21.709	0.106876	-1.68311	3.21119
young MSCs	mmu-miR-297a#-002454	Target	33.1828	0.658704	33.1828	11.4738	21.709	0.106876	0.076767	0.94818
young MSCs	mmu-miR-1957-121163_mat	Target	Undetermined	0.0414621	40	18.291	21.709	0.106876
young MSCs	mmu-miR-704-001639	Target	33.4848	0.628411	33.4848	11.7758	21.709	0.106876	-1.14638	2.21357
young MSCs	mmu-miR-1274a-121150_mat	Target	21.4197	4.4983	21.4197	-0.289288	21.709	0.106876	-8.28461	311.829
young MSCs	mmu-miR-1306-121155_mat	Target	Undetermined	0.0256557	40	18.291	21.709	0.106876
young MSCs	mmu-miR-1839-3p-121203_mat	Target	28.2015	3.99614	28.2015	6.49253	21.709	0.106876	-4.19853	18.3605
young MSCs	mmu-miR-1839-5p-121135_mat	Target	30.4741	2.06169	30.4741	8.76518	21.709	0.106876	-0.511461	1.42549
young MSCs	mmu-miR-1893-121170_mat	Target	Undetermined	-0.00425366	40	18.291	21.709	0.106876
young MSCs	mmu-miR-1896-121128_mat	Target	20.6301	1.95192	20.6301	-1.07885	21.709	0.106876	-5.78008	54.9513
young MSCs	mmu-miR-1897-3p-121126_mat	Target	Undetermined	0.0208619	40	18.291	21.709	0.106876
young MSCs	mmu-miR-1897-5p-121199_mat	Target	23.1889	2.28447	23.1889	1.47994	21.709	0.106876	-3.04844	8.2732
young MSCs	mmu-miR-1898-121195_mat	Target	32.7576	1.46681	32.7576	11.0486	21.709	0.106876	-9.43807	693.653
young MSCs	mmu-miR-1899-121198_mat	Target	Undetermined	0.000301719	40	18.291	21.709	0.106876
young MSCs	mmu-miR-1900-121143_mat	Target	Undetermined	-0.0065341	40	18.291	21.709	0.106876
young MSCs	mmu-miR-1901-121183_mat	Target	34.5324	0.357433	34.5324	12.8235	21.709	0.106876	-7.66319	202.698
young MSCs	mmu-miR-1902-121197_mat	Target	Undetermined	0.0404507	40	18.291	21.709	0.106876
young MSCs	mmu-miR-1903-121153_mat	Target	38.6711	0.400896	38.6711	16.9622	21.709	0.106876	-3.52448	11.5074
young MSCs	mmu-miR-1905-121196_mat	Target	28.0672	0.807128	28.0672	6.35822	21.709	0.106876	-3.89931	14.9213
young MSCs	mmu-miR-1927-121193_mat	Target	Undetermined	0.011023	40	18.291	21.709	0.106876
young MSCs	mmu-miR-1928-121164_mat	Target	30.8423	4.04029	30.8423	9.13333	21.709	0.106876	-4.87189	29.2808
young MSCs	mmu-miR-1930-121201_mat	Target	32.5989	1.9639	32.5989	10.8899	21.709	0.106876	-0.855466	1.80934
young MSCs	mmu-miR-1931-121168_mat	Target	Undetermined	0.00549692	40	18.291	21.709	0.106876
young MSCs	mmu-miR-1932-121172_mat	Target	36.5237	0.710767	36.5237	14.8148	21.709	0.106876	-2.87759	7.3492
young MSCs	mmu-miR-1933-3p-121145_mat	Target	Undetermined	0.00121534	40	18.291	21.709	0.106876
young MSCs	mmu-miR-1934-121185_mat	Target	Undetermined	0.0056926	40	18.291	21.709	0.106876
young MSCs	mmu-miR-1935-121192_mat	Target	Undetermined	0.0198441	40	18.291	21.709	0.106876
young MSCs	mmu-miR-1936-121158_mat	Target	Undetermined	0.0026558	40	18.291	21.709	0.106876
young MSCs	mmu-miR-1938-121194_mat	Target	37.0266	0.482077	37.0266	15.3176	21.709	0.106876	-5.16908	35.9789
young MSCs	mmu-miR-1939-121180_mat	Target	32.3456	1.41909	32.3456	10.6366	21.709	0.106876	-2.3771	5.1949
young MSCs	mmu-miR-1940-121187_mat	Target	32.0548	1.19683	32.0548	10.3459	21.709	0.106876	-10.1408	1128.98
young MSCs	mmu-miR-1941-5p-121140_mat	Target	34.4221	1.09116	34.4221	12.7132	21.709	0.106876	-7.77352	218.808
young MSCs	mmu-miR-1942-121136_mat	Target	30.8117	0.460957	30.8117	9.10272	21.709	0.106876	-11.384	2672.46
young MSCs	mmu-miR-1944-121189_mat	Target	25.8688	5.54816	25.8688	4.15983	21.709	0.106876	-4.34783	20.3624
young MSCs	mmu-miR-1945-121166_mat	Target	Undetermined	0.00624627	40	18.291	21.709	0.106876
young MSCs	mmu-miR-1947-121156_mat	Target	Undetermined	0.0179932	40	18.291	21.709	0.106876
young MSCs	mmu-miR-1948-121171_mat	Target	35.368	0.66103	35.368	13.6591	21.709	0.106876	-6.82761	113.584
young MSCs	mmu-miR-1950-121146_mat	Target	Undetermined	-0.00422287	40	18.291	21.709	0.106876
young MSCs	mmu-miR-1951-121165_mat	Target	20.8335	0.97418	20.8335	-0.875454	21.709	0.106876	-3.08861	8.50675
young MSCs	mmu-miR-1952-121167_mat	Target	Undetermined	0.0030632	40	18.291	21.709	0.106876
young MSCs	mmu-miR-1953-121159_mat	Target	Undetermined	-0.00426191	40	18.291	21.709	0.106876
young MSCs	mmu-miR-1954-121137_mat	Target	31.2575	1.16499	31.2575	9.54853	21.709	0.106876	-4.22012	18.6373
young MSCs	mmu-miR-1958-121181_mat	Target	Undetermined	0.00175464	40	18.291	21.709	0.106876
young MSCs	mmu-miR-1959-121132_mat	Target	Undetermined	0.0307051	40	18.291	21.709	0.106876	0.435564	0.739405
young MSCs	mmu-miR-1960-121148_mat	Target	Undetermined	0.034098	40	18.291	21.709	0.106876
young MSCs	mmu-miR-1962-121173_mat	Target	Undetermined	0.0231164	40	18.291	21.709	0.106876
young MSCs	mmu-miR-1963-121191_mat	Target	Undetermined	0.00318596	40	18.291	21.709	0.106876
young MSCs	mmu-miR-1964-121138_mat	Target	Undetermined	0.0124692	40	18.291	21.709	0.106876
young MSCs	mmu-miR-1965-121186_mat	Target	Undetermined	-0.00331938	40	18.291	21.709	0.106876
young MSCs	mmu-miR-1966-121134_mat	Target	Undetermined	0.00442708	40	18.291	21.709	0.106876
young MSCs	mmu-miR-1967-121151_mat	Target	Undetermined	0.0100889	40	18.291	21.709	0.106876
young MSCs	mmu-miR-1968-121179_mat	Target	Undetermined	-0.00347239	40	18.291	21.709	0.106876
young MSCs	mmu-miR-1969-121131_mat	Target	15.2864	1.08708	15.2864	-6.42255	21.709	0.106876	-2.91887	7.56251
young MSCs	mmu-miR-1970-121202_mat	Target	Undetermined	0.00318754	40	18.291	21.709	0.106876
young MSCs	mmu-miR-1971-121161_mat	Target	29.0662	1.07065	29.0662	7.35727	21.709	0.106876	-4.25094	19.0398
young MSCs	mmu-miR-1981-121200_mat	Target	Undetermined	0.0530136	40	18.291	21.709	0.106876	2.23955	0.211753
young MSCs	mmu-miR-1982.1-121157_mat	Target	33.0804	0.537135	33.0804	11.3715	21.709	0.106876	-2.40546	5.29804
young MSCs	mmu-miR-1982.2-121154_mat	Target	36.9765	0.306506	36.9765	15.2676	21.709	0.106876	-0.762378	1.69628
young MSCs	mmu-miR-669l-121149_mat	Target	36.2501	0.365688	36.2501	14.5411	21.709	0.106876	-5.94557	61.6303
young MSCs	mmu-miR-669m-121190_mat	Target	34.0696	0.847478	34.0696	12.3606	21.709	0.106876	-4.54158	23.2891
young MSCs	mmu-miR-669o-121176_mat	Target	32.4735	1.49606	32.4735	10.7645	21.709	0.106876	-3.29043	9.78406
young MSCs	mmu-let-7g#-002492	Target	34.7718	0.854413	34.7718	13.0628	21.709	0.106876	-7.42383	171.71
young MSCs	mmu-miR-466d-5p-002534	Target	Undetermined	0.0402111	40	18.291	21.709	0.106876	0.815767	0.568106
young MSCs	hsa-let-7f-1#-002417	Target	Undetermined	0.0404956	40	18.291	21.709	0.106876
young MSCs	mmu-miR-669C-002646	Target	Undetermined	0.0196115	40	18.291	21.709	0.106876	5.53832	0.0215179
young MSCs	mmu-miR-1186-002825	Target	Undetermined	0.0267644	40	18.291	21.709	0.106876
young MSCs	rno-miR-551B-002760	Target	Undetermined	-0.00204229	40	18.291	21.709	0.106876
young MSCs	mmu-miR-302a#-002615	Target	Undetermined	-0.00236416	40	18.291	21.709	0.106876
young MSCs	hsa-miR-154#-000478	Target	32.297	3.29679	32.297	10.588	21.709	0.106876	-9.89864	954.527
young MSCs	mmu-miR-1894-5p-121144_mat	Target	Undetermined	0.0218582	40	18.291	21.709	0.106876
young MSCs	mmu-miR-669n-197143_mat	Target	33.2183	0.547856	33.2183	11.5093	21.709	0.106876	0.739955	0.598758
young MSCs	mmu-miR-1961-197391_mat	Target	33.7043	0.78973	33.7043	11.9954	21.709	0.106876	-7.69903	207.798
young MSCs	mmu-miR-1199-240984_mat	Target	Undetermined	0.00375745	40	18.291	21.709	0.106876
young MSCs	mmu-miR-466k-240990_mat	Target	33.0521	0.698683	33.0521	11.3431	21.709	0.106876	-1.79008	3.45834
young MSCs	mmu-miR-1894-3p-241002_mat	Target	29.402	4.3934	29.402	7.69304	21.709	0.106876	-5.33143	40.2644
young MSCs	mmu-miR-1937c-241011_mat	Target	17.9506	4.62097	17.9506	-3.75831	21.709	0.106876	-4.28453	19.4882
young MSCs	mmu-miR-466g-241015_mat	Target	32.7103	1.15536	32.7103	11.0013	21.709	0.106876	-9.48533	716.754
young MSCs	mmu-miR-1937b-241023_mat	Target	17.1418	5.26649	17.1418	-4.56717	21.709	0.106876	-4.35182	20.4187
young MSCs	hsa-miR-196a-241070_mat	Target	23.0967	5.91048	23.0967	1.38775	21.709	0.106876	-1.59133	3.01326
young MSCs	hsa-miR-875-5p-002203	Target	14.5952	1.43085	14.5952	-7.11373	21.709	0.106876	-2.20734	4.61822
young MSCs	hsa-miR-206-000510	Target	26.4936	5.88867	26.4936	4.78467	21.709	0.106876	-7.50829	182.063
young MSCs	mmu-miR-290-000187	Target	Undetermined	0.00345933	40	18.291	21.709	0.106876
young MSCs	mmu-miR-707-001642	Target	Undetermined	0.000870556	40	18.291	21.709	0.106876
young MSCs	rno-miR-352-001339	Target	32.1133	0.698141	32.1133	10.4044	21.709	0.106876	-0.434495	1.35144
young MSCs	mmu-miR-764-5p-002031	Target	Undetermined	0.00561321	40	18.291	21.709	0.106876
young MSCs	hsa-miR-485-5p-001036	Target	Undetermined	0.00432932	40	18.291	21.709	0.106876
young MSCs	mmu-miR-199b-001131	Target	31.5383	1.82153	31.5383	9.82931	21.709	0.106876	-10.6574	1615.04
young MSCs	mmu-miR-34b-001065	Target	Undetermined	0.0269308	40	18.291	21.709	0.106876
young MSCs	mmu-miR-697-001631	Target	34.312	0.53915	34.312	12.6031	21.709	0.106876	-7.88359	236.155
young MSCs	rno-miR-7#-001338	Target	27.0979	2.79847	27.0979	5.38898	21.709	0.106876	-1.63429	3.10435
young MSCs	mmu-miR-501-001356	Target	Undetermined	0.0109483	40	18.291	21.709	0.106876
young MSCs	mmu-miR-592-002017	Target	34.1254	0.988081	34.1254	12.4164	21.709	0.106876	-8.07025	268.774
young MSCs	mmu-miR-21#-002493	Target	31.9423	1.85832	31.9423	10.2334	21.709	0.106876	-10.2533	1220.53
young MSCs	mmu-miR-466b-3-3p-002500	Target	32.7128	0.795855	32.7128	11.0039	21.709	0.106876	-9.48281	715.5
young MSCs	mmu-miR-294#-002595	Target	Undetermined	0.0049724	40	18.291	21.709	0.106876
young MSCs	mmu-miR-1194-002793	Target	Undetermined	0.00295359	40	18.291	21.709	0.106876
young MSCs	mmu-miR-669G-002813	Target	Undetermined	0.00795782	40	18.291	21.709	0.106876
young MSCs	mmu-miR-1943-121174_mat	Target	Undetermined	0.0152968	40	18.291	21.709	0.106876
young MSCs	mmu-miR-1949-121182_mat	Target	28.3233	3.96081	28.3233	6.61432	21.709	0.106876	-3.90546	14.9851
young MSCs	mmu-miR-1956-121129_mat	Target	Undetermined	-0.0103321	40	18.291	21.709	0.106876
young MSCs	mmu-miR-1906-121169_mat	Target	Undetermined	0.010341	40	18.291	21.709	0.106876
young MSCs	mmu-miR-1946a-121178_mat	Target	Undetermined	0.00123799	40	18.291	21.709	0.106876
old MSCs	mmu-let-7b-000378	Target	23.2525	2.90931	23.2525	2.78907	20.4634	0.205202	-1.30138	2.46465
old MSCs	mmu-let-7c-000379	Target	22.3888	4.04836	22.3888	1.92538	20.4634	0.205202	-1.20525	2.30577
old MSCs	mmu-let-7d-002283	Target	24.0065	3.59372	24.0065	3.54313	20.4634	0.205202	-0.0888004	1.06349
old MSCs	mmu-let-7e-002406	Target	22.2526	3.39955	22.2526	1.78924	20.4634	0.205202	-0.131422	1.09537
old MSCs	mmu-let-7g-002282	Target	25.9266	2.43899	25.9266	5.46317	20.4634	0.205202	1.21695	0.430191
old MSCs	mmu-let-7i-002221	Target	23.7453	3.0767	23.7453	3.28188	20.4634	0.205202	-0.588516	1.5037
old MSCs	mmu-miR-1-002222	Target	Undetermined	0.0318593	40	19.5366	20.4634	0.205202	3.98455	0.0631731
old MSCs	rno-miR-1-002064	Target	Undetermined	0.000913918	40	19.5366	20.4634	0.205202
old MSCs	mmu-miR-7a-000268	Target	29.9491	2.47692	29.9491	9.48573	20.4634	0.205202	-5.20665	36.9283
old MSCs	mmu-miR-7b-002555	Target	30.471	2.17665	30.471	10.0076	20.4634	0.205202	-3.73453	13.3109
old MSCs	U6 snRNA-001973	Endogenous Control	20.0789	2.80644	20.4634		20.4634	0.205202
old MSCs	U6 snRNA-001973	Endogenous Control	20.9162	2.09046	20.4634		20.4634	0.205202
old MSCs	mmu-miR-9-000583	Target	29.2997	1.73173	29.2997	8.83629	20.4634	0.205202	-3.58179	11.9736
old MSCs	mmu-miR-10a-000387	Target	28.5188	1.59644	28.5188	8.05539	20.4634	0.205202	3.15591	0.112196
old MSCs	mmu-miR-10b-002218	Target	27.4746	1.61023	27.4746	7.01124	20.4634	0.205202	-10.5964	1548.25
old MSCs	mmu-miR-15a-000389	Target	33.3821	0.446363	33.3821	12.9188	20.4634	0.205202	3.06612	0.1194
old MSCs	mmu-miR-15b-000390	Target	24.3326	3.89549	24.3326	3.86922	20.4634	0.205202	-0.202702	1.15085
old MSCs	mmu-miR-16-000391	Target	22.1575	3.44331	22.1575	1.69408	20.4634	0.205202	0.477251	0.718345
old MSCs	rno-miR-17-3p-002078	Target	Undetermined	0.0139807	40	19.5366	20.4634	0.205202
old MSCs	mmu-miR-18a-002422	Target	27.6515	2.58933	27.6515	7.18813	20.4634	0.205202	-1.34011	2.53171
old MSCs	mmu-miR-18b-002466	Target	Undetermined	0.00796825	40	19.5366	20.4634	0.205202
old MSCs	mmu-miR-19a-000395	Target	26.6925	2.58114	26.6925	6.22911	20.4634	0.205202	1.35387	0.39124
old MSCs	mmu-miR-19b-000396	Target	22.0475	2.7869	22.0475	1.58409	20.4634	0.205202	0.726027	0.604567
old MSCs	mmu-miR-20a-000580	Target	22.9396	3.25912	22.9396	2.47616	20.4634	0.205202	1.68277	0.311484
old MSCs	mmu-miR-20b-001014	Target	24.8166	2.86044	24.8166	4.35319	20.4634	0.205202	0.591251	0.663767
old MSCs	rno-miR-20b-3p-002052	Target	Undetermined	0.00699377	40	19.5366	20.4634	0.205202
old MSCs	mmu-miR-21-000397	Target	22.6564	3.27142	22.6564	2.19299	20.4634	0.205202	-1.99062	3.97409
old MSCs	mmu-miR-23b-000400	Target	28.6521	2.07025	28.6521	8.18869	20.4634	0.205202	-0.663565	1.58399
old MSCs	mmu-miR-24-000402	Target	19.5451	4.0461	19.5451	-0.918283	20.4634	0.205202	-2.69087	6.45703
old MSCs	mmu-miR-25-000403	Target	26.779	5.25791	26.779	6.3156	20.4634	0.205202	1.18208	0.440716
old MSCs	mmu-miR-26a-000405	Target	23.4937	3.60891	23.4937	3.03029	20.4634	0.205202	0.807806	0.57125
old MSCs	mmu-miR-26b-000407	Target	25.6472	3.52875	25.6472	5.18385	20.4634	0.205202	0.930479	0.524684
old MSCs	mmu-miR-27a-000408	Target	24.7051	5.70182	24.7051	4.24169	20.4634	0.205202	-4.15739	17.8443
old MSCs	mmu-miR-27b-000409	Target	25.8466	4.36716	25.8466	5.38326	20.4634	0.205202	-3.0769	8.43798
old MSCs	U6 snRNA-001973	Endogenous Control	20.1553	2.52338	20.4634		20.4634	0.205202
old MSCs	U6 snRNA-001973	Endogenous Control	20.7031	2.2178	20.4634		20.4634	0.205202
old MSCs	mmu-miR-28-000411	Target	25.2128	3.56628	25.2128	4.7494	20.4634	0.205202	-3.26679	9.62505
old MSCs	mmu-miR-29b-000413	Target	28.7017	1.48005	28.7017	8.23827	20.4634	0.205202	-2.87901	7.35644
old MSCs	mmu-miR-29c-000587	Target	23.354	4.37217	23.354	2.8906	20.4634	0.205202	-1.73076	3.31903
old MSCs	mmu-miR-30b-000602	Target	24.2574	3.96348	24.2574	3.79401	20.4634	0.205202	1.1393	0.453979
old MSCs	mmu-miR-30c-000419	Target	23.8758	3.30737	23.8758	3.41242	20.4634	0.205202	0.901539	0.535315
old MSCs	mmu-miR-30d-000420	Target	28.5033	2.66254	28.5033	8.03995	20.4634	0.205202	1.1532	0.449626
old MSCs	mmu-miR-32-002109	Target	Undetermined	0.00309807	40	19.5366	20.4634	0.205202	6.22823	0.0133388
old MSCs	mmu-miR-34a-000426	Target	24.7059	2.61539	24.7059	4.24247	20.4634	0.205202	-6.22952	75.0364
old MSCs	mmu-miR-34c-000428	Target	27.9903	2.47306	27.9903	7.52687	20.4634	0.205202	-12.7149	6723.22
old MSCs	mmu-miR-93-001090	Target	25.9027	2.99513	25.9027	5.43936	20.4634	0.205202	1.48007	0.35847
old MSCs	mmu-miR-96-000186	Target	34.4386	1.53644	34.4386	13.9752	20.4634	0.205202	-6.26664	76.9922
old MSCs	mmu-miR-98-000577	Target	Undetermined	0.056668	40	19.5366	20.4634	0.205202
old MSCs	mmu-miR-99a-000435	Target	23.3843	2.21047	23.3843	2.92088	20.4634	0.205202	-3.42828	10.765
old MSCs	mmu-miR-99b-000436	Target	23.4921	1.94638	23.4921	3.02868	20.4634	0.205202	-3.97411	15.7155
old MSCs	mmu-miR-100-000437	Target	22.8046	3.34962	22.8046	2.34119	20.4634	0.205202	-4.19209	18.2787
old MSCs	mmu-miR-101a-002253	Target	28.4459	3.98355	28.4459	7.98248	20.4634	0.205202	-0.0727158	1.05169
old MSCs	mmu-miR-103-000439	Target	29.4794	1.07252	29.4794	9.01604	20.4634	0.205202	-0.216475	1.16189
old MSCs	mmu-miR-105-002465	Target	Undetermined	0.00926834	40	19.5366	20.4634	0.205202
old MSCs	mmu-miR-107-000443	Target	33.9642	0.819256	33.9642	13.5008	20.4634	0.205202	-0.484962	1.39955
old MSCs	mmu-miR-122-002245	Target	Undetermined	0.000634313	40	19.5366	20.4634	0.205202
old MSCs	mmu-miR-124-001182	Target	31.4044	0.79832	31.4044	10.9411	20.4634	0.205202	-3.83748	14.2954
old MSCs	mmu-miR-125a-3p-002199	Target	30.1649	2.2059	30.1649	9.70148	20.4634	0.205202	-5.87704	58.7715
old MSCs	mmu-miR-125a-5p-002198	Target	24.9681	2.7662	24.9681	4.50471	20.4634	0.205202	-4.22157	18.656
old MSCs	mmu-miR-125b-5p-000449	Target	20.4095	3.91053	20.4095	-0.0539284	20.4634	0.205202	-5.48363	44.7442
old MSCs	mmu-miR-126-3p-002228	Target	30.8643	1.77637	30.8643	10.4009	20.4634	0.205202	7.26792	0.00648842
old MSCs	mmu-miR-126-5p-000451	Target	33.3823	0.995816	33.3823	12.9189	20.4634	0.205202	8.49696	0.00276797
old MSCs	mmu-miR-127-000452	Target	24.5925	3.77473	24.5925	4.12906	20.4634	0.205202	-5.86932	58.4575
old MSCs	mmu-miR-128a-002216	Target	31.5679	1.26114	31.5679	11.1045	20.4634	0.205202	2.02458	0.245777
old MSCs	mmu-miR-129-3p-001184	Target	28.2865	2.64451	28.2865	7.82308	20.4634	0.205202	-12.4187	5475.3
old MSCs	mmu-miR-130a-000454	Target	27.3451	2.34897	27.3451	6.88171	20.4634	0.205202	-0.661755	1.58201
old MSCs	mmu-miR-130b-000456	Target	28.5493	1.91673	28.5493	8.08591	20.4634	0.205202	0.832565	0.56153
old MSCs	mmu-miR-132-000457	Target	23.1995	3.83104	23.1995	2.73609	20.4634	0.205202	-17.5057	186100
old MSCs	mmu-miR-133a-002246	Target	Undetermined	0.0183045	40	19.5366	20.4634	0.205202	6.8834	0.00847015
old MSCs	mmu-miR-133b-002247	Target	Undetermined	0.00441092	40	19.5366	20.4634	0.205202
old MSCs	mmu-miR-134-001186	Target	28.282	1.30992	28.282	7.81862	20.4634	0.205202	-12.4232	5492.26
old MSCs	mmu-miR-135a-000460	Target	31.6459	2.34262	31.6459	11.1825	20.4634	0.205202	-2.60344	6.07734
old MSCs	mmu-miR-135b-002261	Target	36.1134	0.655964	36.1134	15.65	20.4634	0.205202	-2.06841	4.19425
old MSCs	mmu-miR-136-002511	Target	33.7887	1.55685	33.7887	13.3253	20.4634	0.205202	-6.91646	120.799
old MSCs	mmu-miR-137-001129	Target	Undetermined	0.00562894	40	19.5366	20.4634	0.205202
old MSCs	mmu-miR-138-002284	Target	26.8449	3.15138	26.8449	6.38152	20.4634	0.205202	-3.79025	13.835
old MSCs	mmu-miR-139-3p-002546	Target	Undetermined	0.00109118	40	19.5366	20.4634	0.205202
old MSCs	mmu-miR-139-5p-002289	Target	29.4204	1.76737	29.4204	8.95701	20.4634	0.205202	3.39956	0.0947612
old MSCs	mmu-miR-140-001187	Target	23.8704	4.17137	23.8704	3.40704	20.4634	0.205202	-1.55177	2.93177
old MSCs	mmu-miR-141-000463	Target	Undetermined	0.0414057	40	19.5366	20.4634	0.205202
old MSCs	mmu-miR-142-3p-000464	Target	33.0901	2.05139	33.0901	12.6267	20.4634	0.205202	8.64769	0.00249337
old MSCs	mmu-miR-142-5p-002248	Target	Undetermined	0.0123146	40	19.5366	20.4634	0.205202	6.23212	0.0133028
old MSCs	snoRNA135-001230	Target	24.1116	2.1933	24.1116	3.64824	20.4634	0.205202	0.799929	0.574378
old MSCs	mmu-miR-145-002278	Target	23.7895	2.48333	23.7895	3.32615	20.4634	0.205202	-11.5319	2961.13
old MSCs	mmu-miR-146a-000468	Target	31.3485	1.62212	31.3485	10.8852	20.4634	0.205202	5.85304	0.0173006
old MSCs	mmu-miR-146b-001097	Target	28.2082	2.52896	28.2082	7.74486	20.4634	0.205202	3.23946	0.105883
old MSCs	mmu-miR-147-002262	Target	Undetermined	0.00612068	40	19.5366	20.4634	0.205202
old MSCs	mmu-miR-148a-000470	Target	28.7675	2.29167	28.7675	8.30408	20.4634	0.205202	0.249964	0.840917
old MSCs	mmu-miR-148b-000471	Target	33.1883	0.686996	33.1883	12.7249	20.4634	0.205202	0.948462	0.518184
old MSCs	mmu-miR-150-000473	Target	30.9609	2.70317	30.9609	10.4975	20.4634	0.205202	7.747	0.004655
old MSCs	mmu-miR-151-3p-001190	Target	29.1115	1.06299	29.1115	8.64811	20.4634	0.205202	-3.88441	14.7681
old MSCs	mmu-miR-152-000475	Target	25.7183	4.71472	25.7183	5.25488	20.4634	0.205202	-3.49743	11.2936
old MSCs	mmu-miR-153-001191	Target	Undetermined	0.00626236	40	19.5366	20.4634	0.205202
old MSCs	mmu-miR-154-000477	Target	Undetermined	0.00143147	40	19.5366	20.4634	0.205202
old MSCs	mmu-miR-181a-000480	Target	30.0254	1.02471	30.0254	9.56205	20.4634	0.205202	3.01475	0.123729
old MSCs	mmu-miR-181c-000482	Target	33.7715	0.679188	33.7715	13.3081	20.4634	0.205202	3.44361	0.0919116
old MSCs	mmu-miR-182-002599	Target	29.2351	2.64361	29.2351	8.77173	20.4634	0.205202	-11.4701	2836.85
old MSCs	mmu-miR-183-002269	Target	33.6645	0.723632	33.6645	13.2011	20.4634	0.205202	-7.04071	131.663
old MSCs	mmu-miR-184-000485	Target	28.3707	3.6476	28.3707	7.90733	20.4634	0.205202	-12.3345	5164.73
old MSCs	mmu-miR-185-002271	Target	32.2362	0.743705	32.2362	11.7728	20.4634	0.205202	-1.56023	2.94902
old MSCs	mmu-miR-186-002285	Target	26.658	3.49801	26.658	6.19466	20.4634	0.205202	-1.83832	3.57593
old MSCs	mmu-miR-190-000489	Target	Undetermined	0.00244263	40	19.5366	20.4634	0.205202
old MSCs	mmu-miR-191-002299	Target	22.4644	3.41533	22.4644	2.001	20.4634	0.205202	0.70875	0.61185
old MSCs	mmu-miR-192-000491	Target	29.8353	2.74306	29.8353	9.37194	20.4634	0.205202	-1.51476	2.85752
old MSCs	mmu-miR-193-002250	Target	32.2312	2.34644	32.2312	11.7678	20.4634	0.205202	-8.47401	355.574
old MSCs	mmu-miR-193b-002467	Target	23.5927	3.24378	23.5927	3.12935	20.4634	0.205202	-4.53342	23.1577
old MSCs	mmu-miR-194-000493	Target	30.0079	0.333106	30.0079	9.54448	20.4634	0.205202	6.491	0.0111177
old MSCs	mmu-miR-195-000494	Target	26.4395	3.41918	26.4395	5.97607	20.4634	0.205202	0.249866	0.840974
old MSCs	mmu-miR-196b-002215	Target	28.5784	1.60347	28.5784	8.11506	20.4634	0.205202	2.54865	0.170915
old MSCs	rno-miR-196c-002049	Target	25.6449	2.135	25.6449	5.18147	20.4634	0.205202	1.81355	0.28449
old MSCs	mmu-miR-197-000497	Target	33.0764	0.472176	33.0764	12.613	20.4634	0.205202	-0.77248	1.7082
old MSCs	mmu-miR-199a-3p-002304	Target	23.9161	2.26943	23.9161	3.45273	20.4634	0.205202	-11.1445	2263.75
old MSCs	mmu-miR-199a-5p-000498	Target	30.9072	1.03528	30.9072	10.4438	20.4634	0.205202	-9.79801	890.213
old MSCs	mmu-miR-200a-000502	Target	Undetermined	0.0142946	40	19.5366	20.4634	0.205202
old MSCs	mmu-miR-200b-002251	Target	Undetermined	0.00972438	40	19.5366	20.4634	0.205202	4.91074	0.0332446
old MSCs	mmu-miR-200c-002300	Target	Undetermined	0.0337504	40	19.5366	20.4634	0.205202	7.49805	0.00553174
old MSCs	mmu-miR-201-002578	Target	Undetermined	0.0134928	40	19.5366	20.4634	0.205202
old MSCs	mmu-miR-202-3p-001195	Target	Undetermined	0.0617514	40	19.5366	20.4634	0.205202
old MSCs	mmu-miR-202-5p-002579	Target	Undetermined	0.00510299	40	19.5366	20.4634	0.205202
old MSCs	mmu-miR-203-000507	Target	34.9207	0.621282	34.9207	14.4573	20.4634	0.205202	9.40992	0.00147005
old MSCs	mmu-miR-204-000508	Target	31.2153	1.3679	31.2153	10.7519	20.4634	0.205202	-9.48992	719.035
old MSCs	mmu-miR-205-000509	Target	32.6813	1.88258	32.6813	12.2179	20.4634	0.205202	-8.02388	260.272
old MSCs	mmu-miR-207-001198	Target	Undetermined	-0.00225163	40	19.5366	20.4634	0.205202
old MSCs	rno-miR-207-001315	Target	Undetermined	0.0312633	40	19.5366	20.4634	0.205202
old MSCs	mmu-miR-208-000511	Target	Undetermined	0.0418434	40	19.5366	20.4634	0.205202
old MSCs	mmu-miR-208b-002290	Target	Undetermined	0.00548351	40	19.5366	20.4634	0.205202
old MSCs	mmu-miR-210-000512	Target	27.437	0.977834	27.437	6.97363	20.4634	0.205202	-13.2682	9865.48
old MSCs	mmu-miR-211-001199	Target	Undetermined	0.00573012	40	19.5366	20.4634	0.205202
old MSCs	mmu-miR-214-002306	Target	23.2024	3.14388	23.2024	2.73899	20.4634	0.205202	-17.5028	185726
old MSCs	mmu-miR-215-001200	Target	Undetermined	0.0238755	40	19.5366	20.4634	0.205202
old MSCs	snoRNA202-001232	Target	20.0065	3.85818	20.0065	-0.456839	20.4634	0.205202	0.75658	0.591898
old MSCs	mmu-miR-216a-002220	Target	Undetermined	0.00728708	40	19.5366	20.4634	0.205202
old MSCs	mmu-miR-216b-002326	Target	Undetermined	0.00321132	40	19.5366	20.4634	0.205202
old MSCs	mmu-miR-217-002556	Target	Undetermined	0.00162935	40	19.5366	20.4634	0.205202
old MSCs	mmu-miR-218-000521	Target	26.5122	3.92607	26.5122	6.0488	20.4634	0.205202	-5.17513	36.1301
old MSCs	mmu-miR-219-000522	Target	Undetermined	-0.000199407	40	19.5366	20.4634	0.205202
old MSCs	mmu-miR-220-002468	Target	Undetermined	0.0098885	40	19.5366	20.4634	0.205202
old MSCs	mmu-miR-221-000524	Target	22.1705	3.3644	22.1705	1.70711	20.4634	0.205202	-4.05321	16.6011
old MSCs	mmu-miR-222-002276	Target	20.1782	3.37853	20.1782	-0.285158	20.4634	0.205202	-1.18531	2.27412
old MSCs	mmu-miR-223-002295	Target	28.9058	3.03513	28.9058	8.44237	20.4634	0.205202	5.62886	0.020209
old MSCs	mmu-miR-224-002553	Target	28.2377	2.62991	28.2377	7.77432	20.4634	0.205202	0.441278	0.736482
old MSCs	mmu-miR-290-3p-002591	Target	Undetermined	-0.00364465	40	19.5366	20.4634	0.205202
old MSCs	mmu-miR-291a-3p-002592	Target	Undetermined	0.00380146	40	19.5366	20.4634	0.205202
old MSCs	mmu-miR-291b-5p-002537	Target	Undetermined	0.000206053	40	19.5366	20.4634	0.205202
old MSCs	mmu-miR-292-3p-002593	Target	36.7967	0.36223	36.7967	16.3333	20.4634	0.205202	-3.90852	15.017
old MSCs	mmu-miR-293-001794	Target	Undetermined	0.00356412	40	19.5366	20.4634	0.205202
old MSCs	mmu-miR-294-001056	Target	Undetermined	0.0378508	40	19.5366	20.4634	0.205202
old MSCs	mmu-miR-295-000189	Target	Undetermined	0.186645	40	19.5366	20.4634	0.205202
old MSCs	mmu-miR-296-3p-002101	Target	Undetermined	0.0210173	40	19.5366	20.4634	0.205202
old MSCs	mmu-miR-296-5p-000527	Target	29.8356	1.25919	29.8356	9.37217	20.4634	0.205202	-0.0947418	1.06787
old MSCs	mmu-miR-297c-002480	Target	Undetermined	0.00991511	40	19.5366	20.4634	0.205202
old MSCs	mmu-miR-297b-5p-001626	Target	Undetermined	0.0033837	40	19.5366	20.4634	0.205202
old MSCs	mmu-miR-298-002598	Target	Undetermined	0.0188261	40	19.5366	20.4634	0.205202
old MSCs	mmu-miR-301a-000528	Target	28.6547	2.09306	28.6547	8.19134	20.4634	0.205202	-1.03277	2.04595
old MSCs	mmu-miR-301b-002600	Target	29.1351	2.0797	29.1351	8.67174	20.4634	0.205202	-0.136204	1.09901
old MSCs	mmu-miR-302a-000529	Target	Undetermined	0.0163763	40	19.5366	20.4634	0.205202
old MSCs	mmu-miR-302c-002558	Target	Undetermined	0.00650609	40	19.5366	20.4634	0.205202
old MSCs	mmu-miR-302d-000535	Target	Undetermined	0.0166392	40	19.5366	20.4634	0.205202
old MSCs	mmu-miR-320-002277	Target	25.1622	2.74953	25.1622	4.6988	20.4634	0.205202	-0.929716	1.9049
old MSCs	mmu-miR-323-3p-002227	Target	35.7235	0.390112	35.7235	15.2602	20.4634	0.205202	-4.98165	31.5956
old MSCs	mmu-miR-324-5p-000539	Target	27.1817	2.50169	27.1817	6.71835	20.4634	0.205202	-3.14416	8.84071
old MSCs	mmu-miR-325-002510	Target	Undetermined	-0.0117248	40	19.5366	20.4634	0.205202
old MSCs	rno-miR-327-001328	Target	35.6906	0.434306	35.6906	15.2272	20.4634	0.205202	-5.01459	32.3252
old MSCs	mmu-miR-328-000543	Target	25.1875	2.7133	25.1875	4.7241	20.4634	0.205202	-0.423351	1.34104
old MSCs	mmu-miR-329-000192	Target	31.3339	1.56095	31.3339	10.8705	20.4634	0.205202	-9.37131	662.286
old MSCs	mmu-miR-330-002230	Target	Undetermined	-0.00264239	40	19.5366	20.4634	0.205202
old MSCs	mmu-miR-331-3p-000545	Target	26.4618	2.86703	26.4618	5.99839	20.4634	0.205202	-1.57623	2.98189
old MSCs	mmu-miR-331-5p-002233	Target	34.428	0.522942	34.428	13.9646	20.4634	0.205202	-6.27718	77.5567
old MSCs	rno-miR-333-001329	Target	Undetermined	0.0183925	40	19.5366	20.4634	0.205202
old MSCs	mmu-miR-335-3p-002185	Target	35.685	0.328368	35.685	15.2216	20.4634	0.205202	-5.02016	32.4502
old MSCs	mmu-miR-335-5p-000546	Target	33.6851	1.151	33.6851	13.2217	20.4634	0.205202	-7.0201	129.796
old MSCs	rno-miR-336-001331	Target	Undetermined	-0.000414193	40	19.5366	20.4634	0.205202
old MSCs	mmu-miR-337-3p-002532	Target	32.2975	1.39291	32.2975	11.8341	20.4634	0.205202	-8.40768	339.598
old MSCs	mmu-miR-337-5p-002515	Target	29.0382	3.29333	29.0382	8.57486	20.4634	0.205202	-6.38964	83.8442
old MSCs	mmu-miR-338-3p-002252	Target	Undetermined	0.00772917	40	19.5366	20.4634	0.205202
old MSCs	mmu-miR-339-3p-002533	Target	Undetermined	0.0513391	40	19.5366	20.4634	0.205202	8.29287	0.00318858
old MSCs	rno-miR-339-3p-002059	Target	Undetermined	0.0242462	40	19.5366	20.4634	0.205202
old MSCs	mmu-miR-339-5p-002257	Target	37.4253	0.311949	37.4253	16.962	20.4634	0.205202	3.32354	0.0998884
old MSCs	U87-001712	Target	25.1952	2.66576	25.1952	4.73177	20.4634	0.205202	0.799589	0.574513
old MSCs	mmu-miR-340-3p-002259	Target	30.2063	2.68286	30.2063	9.74292	20.4634	0.205202	1.71752	0.304071
old MSCs	mmu-miR-340-5p-002258	Target	34.063	0.617982	34.063	13.5996	20.4634	0.205202	5.10568	0.0290427
old MSCs	mmu-miR-342-3p-002260	Target	29.9084	1.28734	29.9084	9.44502	20.4634	0.205202	0.177528	0.884217
old MSCs	mmu-miR-342-5p-002527	Target	Undetermined	0.00574708	40	19.5366	20.4634	0.205202	1.43671	0.36941
old MSCs	rno-miR-343-001344	Target	Undetermined	0.00870559	40	19.5366	20.4634	0.205202
old MSCs	mmu-miR-344-001063	Target	Undetermined	0.00549787	40	19.5366	20.4634	0.205202
old MSCs	rno-miR-344-3p-001332	Target	Undetermined	0.00276011	40	19.5366	20.4634	0.205202
old MSCs	rno-miR-344-5p-002060	Target	Undetermined	0.00895345	40	19.5366	20.4634	0.205202
old MSCs	mmu-miR-345-3p-002529	Target	Undetermined	0.0607815	40	19.5366	20.4634	0.205202
old MSCs	rno-miR-345-3p-002061	Target	30.1984	2.4174	30.1984	9.73501	20.4634	0.205202	-2.97641	7.87027
old MSCs	mmu-miR-345-5p-002528	Target	33.9709	0.465773	33.9709	13.5075	20.4634	0.205202	1.16053	0.447347
old MSCs	mmu-miR-346-001064	Target	Undetermined	0.0051834	40	19.5366	20.4634	0.205202
old MSCs	rno-miR-346-001333	Target	Undetermined	0.0124131	40	19.5366	20.4634	0.205202
old MSCs	rno-miR-347-001334	Target	Undetermined	-0.010913	40	19.5366	20.4634	0.205202
old MSCs	rno-miR-349-001335	Target	Undetermined	0.0247366	40	19.5366	20.4634	0.205202
old MSCs	mmu-miR-350-002530	Target	28.6519	2.85516	28.6519	8.18856	20.4634	0.205202	-4.376	20.7638
old MSCs	rno-miR-351-002063	Target	30.2075	1.99023	30.2075	9.74411	20.4634	0.205202	-1.66762	3.1769
old MSCs	mmu-miR-361-000554	Target	29.2311	2.85429	29.2311	8.76769	20.4634	0.205202	-2.56081	5.9004
old MSCs	mmu-miR-362-3p-002616	Target	31.7421	3.00934	31.7421	11.2788	20.4634	0.205202	-3.09689	8.55575
old MSCs	mmu-miR-363-001271	Target	Undetermined	0.0138031	40	19.5366	20.4634	0.205202	1.87498	0.272631
old MSCs	mmu-miR-365-001020	Target	25.466	2.23563	25.466	5.00264	20.4634	0.205202	-6.12842	69.9582
old MSCs	mmu-miR-367-000555	Target	Undetermined	0.0353991	40	19.5366	20.4634	0.205202
old MSCs	mmu-miR-369-3p-000557	Target	34.0601	2.66353	34.0601	13.5967	20.4634	0.205202	-6.64512	100.088
old MSCs	mmu-miR-369-5p-001021	Target	33.6719	1.68176	33.6719	13.2085	20.4634	0.205202	-7.03329	130.988
old MSCs	mmu-miR-370-002275	Target	Undetermined	0.0606121	40	19.5366	20.4634	0.205202
old MSCs	mmu-miR-375-000564	Target	Undetermined	0.0120003	40	19.5366	20.4634	0.205202	3.84633	0.0695248
old MSCs	mmu-miR-376a-001069	Target	33.2752	0.86794	33.2752	12.8118	20.4634	0.205202	-7.43003	172.449
old MSCs	mmu-miR-376b-002452	Target	35.9016	0.350918	35.9016	15.4382	20.4634	0.205202	-4.8036	27.9273
old MSCs	mmu-miR-376c-002450	Target	26.6153	4.70219	26.6153	6.15196	20.4634	0.205202	-7.63363	198.587
old MSCs	mmu-miR-377-000566	Target	Undetermined	0.00192815	40	19.5366	20.4634	0.205202
old MSCs	rno-miR-377-001320	Target	Undetermined	-0.0022667	40	19.5366	20.4634	0.205202
old MSCs	mmu-miR-379-001138	Target	26.3593	2.799	26.3593	5.89593	20.4634	0.205202	-14.3459	20822.7
old MSCs	mmu-miR-380-3p-001071	Target	Undetermined	0.000100553	40	19.5366	20.4634	0.205202
old MSCs	mmu-miR-380-5p-002601	Target	29.5853	2.74443	29.5853	9.12192	20.4634	0.205202	-11.1199	2225.45
old MSCs	mmu-miR-381-000571	Target	35.2387	1.51079	35.2387	14.7753	20.4634	0.205202	-5.4665	44.216
old MSCs	mmu-miR-382-000572	Target	27.9941	1.16837	27.9941	7.53071	20.4634	0.205202	-12.7111	6705.34
old MSCs	mmu-miR-383-001767	Target	33.272	1.42899	33.272	12.8086	20.4634	0.205202	-7.43324	172.833
old MSCs	mmu-miR-384-3p-002603	Target	Undetermined	0.0090223	40	19.5366	20.4634	0.205202
old MSCs	mmu-miR-384-5p-002602	Target	Undetermined	0.01191	40	19.5366	20.4634	0.205202
old MSCs	mmu-miR-409-3p-002332	Target	24.9282	3.51858	24.9282	4.46481	20.4634	0.205202	-7.01918	129.713
old MSCs	mmu-miR-409-5p-002331	Target	Undetermined	0.0226743	40	19.5366	20.4634	0.205202
old MSCs	mmu-miR-410-001274	Target	28.849	2.49312	28.849	8.38558	20.4634	0.205202	-8.11446	277.137
old MSCs	mmu-miR-411-001610	Target	25.7234	4.36872	25.7234	5.26003	20.4634	0.205202	-5.91399	60.296
old MSCs	rno-miR-421-001343	Target	Undetermined	0.00707823	40	19.5366	20.4634	0.205202
old MSCs	mmu-miR-423-5p-002340	Target	31.0849	0.682381	31.0849	10.6215	20.4634	0.205202	0.618788	0.651218
old MSCs	mmu-miR-425-001516	Target	Undetermined	0.0205587	40	19.5366	20.4634	0.205202	9.80249	0.00111984
old MSCs	mmu-miR-429-001077	Target	Undetermined	0.0296218	40	19.5366	20.4634	0.205202
old MSCs	Y1-001727	Target	24.4279	2.37253	24.4279	3.9645	20.4634	0.205202	-4.54695	23.376
old MSCs	mmu-miR-431-001979	Target	35.7404	0.368916	35.7404	15.277	20.4634	0.205202	-4.96476	31.2278
old MSCs	mmu-miR-433-001028	Target	36.239	0.32621	36.239	15.7756	20.4634	0.205202	-4.46616	22.1029
old MSCs	mmu-miR-434-3p-002604	Target	26.3037	3.06117	26.3037	5.84027	20.4634	0.205202	-5.20949	37.001
old MSCs	mmu-miR-434-5p-002581	Target	30.0984	1.73094	30.0984	9.635	20.4634	0.205202	-4.97619	31.4762
old MSCs	mmu-miR-448-001029	Target	Undetermined	0.00931877	40	19.5366	20.4634	0.205202
old MSCs	mmu-miR-449a-001030	Target	32.2924	2.65579	32.2924	11.829	20.4634	0.205202	-2.6981	6.48949
old MSCs	mmu-miR-449b-002539	Target	Undetermined	0.0111934	40	19.5366	20.4634	0.205202
old MSCs	mmu-miR-450a-5p-002303	Target	Undetermined	0.00328523	40	19.5366	20.4634	0.205202	7.61622	0.00509669
old MSCs	mmu-miR-450b-5p-001962	Target	Undetermined	0.0312998	40	19.5366	20.4634	0.205202
old MSCs	mmu-miR-451-001141	Target	Undetermined	0.00805259	40	19.5366	20.4634	0.205202	9.38158	0.00149921
old MSCs	mmu-miR-453-002484	Target	Undetermined	0.00958276	40	19.5366	20.4634	0.205202
old MSCs	mmu-miR-455-002455	Target	Undetermined	0.00369716	40	19.5366	20.4634	0.205202
old MSCs	mmu-miR-465a-3p-002040	Target	Undetermined	0.00404268	40	19.5366	20.4634	0.205202
old MSCs	mmu-miR-465a-5p-001082	Target	Undetermined	0.0215549	40	19.5366	20.4634	0.205202
old MSCs	mmu-miR-465b-5p-002485	Target	Undetermined	0.00602466	40	19.5366	20.4634	0.205202
old MSCs	rno-miR-466b-002066	Target	Undetermined	-0.000561416	40	19.5366	20.4634	0.205202
old MSCs	rno-miR-466c-002067	Target	Undetermined	-0.00399208	40	19.5366	20.4634	0.205202
old MSCs	mmu-miR-466h-002516	Target	Undetermined	0.0479723	40	19.5366	20.4634	0.205202
old MSCs	mmu-miR-467a-002587	Target	28.1239	3.37188	28.1239	7.66051	20.4634	0.205202	-1.77799	3.42948
old MSCs	mmu-miR-467c-002517	Target	29.2959	1.81598	29.2959	8.8325	20.4634	0.205202	-3.3989	10.548
old MSCs	mmu-miR-467d-002518	Target	32.6016	1.12171	32.6016	12.1382	20.4634	0.205202	-7.78331	220.298
old MSCs	mmu-miR-467e-002568	Target	31.664	1.05188	31.664	11.2006	20.4634	0.205202	-4.96969	31.3347
old MSCs	mmu-miR-470-002588	Target	Undetermined	0.00563645	40	19.5366	20.4634	0.205202
old MSCs	mmu-miR-484-001821	Target	22.8445	2.81194	22.8445	2.38115	20.4634	0.205202	-1.20123	2.29936
old MSCs	mmu-miR-486-001278	Target	Undetermined	0.00757682	40	19.5366	20.4634	0.205202
old MSCs	mmu-miR-487b-001285	Target	Undetermined	0.00972071	40	19.5366	20.4634	0.205202
old MSCs	mmu-miR-489-001302	Target	Undetermined	0.00690979	40	19.5366	20.4634	0.205202
old MSCs	mmu-miR-491-001630	Target	32.9553	0.630138	32.9553	12.4919	20.4634	0.205202	1.25417	0.419235
old MSCs	mmu-miR-493-002519	Target	35.7794	0.580089	35.7794	15.316	20.4634	0.205202	-4.92577	30.3951
old MSCs	mmu-miR-494-002365	Target	27.9365	1.81253	27.9365	7.47309	20.4634	0.205202	-11.7252	3385.57
old MSCs	mmu-miR-495-001663	Target	28.2698	1.68574	28.2698	7.8064	20.4634	0.205202	-5.08872	34.0296
old MSCs	mmu-miR-497-001346	Target	30.1422	1.62783	30.1422	9.67879	20.4634	0.205202	-3.10089	8.57951
old MSCs	mmu-miR-499-001352	Target	Undetermined	0.0174652	40	19.5366	20.4634	0.205202
old MSCs	mmu-miR-500-002606	Target	37.3528	0.295883	37.3528	16.8895	20.4634	0.205202	-3.35235	10.2131
old MSCs	mmu-miR-501-3p-001651	Target	Undetermined	0.0320059	40	19.5366	20.4634	0.205202
old MSCs	mmu-miR-503-002456	Target	Undetermined	-0.00476193	40	19.5366	20.4634	0.205202
old MSCs	mmu-miR-504-002084	Target	Undetermined	0.00279561	40	19.5366	20.4634	0.205202
old MSCs	mmu-miR-505-001655	Target	Undetermined	0.00380069	40	19.5366	20.4634	0.205202
old MSCs	mmu-miR-509-3p-002521	Target	33.0442	0.514233	33.0442	12.5808	20.4634	0.205202	-7.66099	202.389
old MSCs	mmu-miR-509-5p-002520	Target	Undetermined	0.0117209	40	19.5366	20.4634	0.205202
old MSCs	mmu-miR-511-002549	Target	Undetermined	0.000158846	40	19.5366	20.4634	0.205202
old MSCs	mmu-miR-532-3p-002355	Target	26.4114	3.35754	26.4114	5.94797	20.4634	0.205202	-0.363413	1.28647
old MSCs	mmu-miR-532-5p-001518	Target	26.0462	3.44186	26.0462	5.58279	20.4634	0.205202	-0.499847	1.41406
old MSCs	rno-miR-532-5p-002051	Target	31.9847	0.562088	31.9847	11.5213	20.4634	0.205202	0.876175	0.54481
old MSCs	mmu-miR-539-001286	Target	Undetermined	0.0192127	40	19.5366	20.4634	0.205202
old MSCs	mmu-miR-540-3p-001310	Target	Undetermined	-0.00159898	40	19.5366	20.4634	0.205202
old MSCs	mmu-miR-540-5p-002561	Target	Undetermined	0.00897312	40	19.5366	20.4634	0.205202
old MSCs	ath-miR159a-000338	Target	Undetermined	0.0294679	40	19.5366	20.4634	0.205202
old MSCs	mmu-miR-542-3p-001284	Target	33.9264	1.70635	33.9264	13.463	20.4634	0.205202	0.42905	0.74275
old MSCs	mmu-miR-542-5p-002563	Target	36.3079	0.539965	36.3079	15.8446	20.4634	0.205202	-1.07	2.09943
old MSCs	mmu-miR-543-002376	Target	30.0719	1.25607	30.0719	9.60849	20.4634	0.205202	-7.1573	142.745
old MSCs	rno-miR-543-002065	Target	Undetermined	0.00170609	40	19.5366	20.4634	0.205202
old MSCs	mmu-miR-544-002550	Target	Undetermined	0.0179847	40	19.5366	20.4634	0.205202
old MSCs	mmu-miR-551b-001535	Target	Undetermined	0.00888515	40	19.5366	20.4634	0.205202
old MSCs	mmu-miR-574-3p-002349	Target	26.6847	2.34645	26.6847	6.22133	20.4634	0.205202	-3.52366	11.5007
old MSCs	mmu-miR-582-3p-002567	Target	36.078	0.555392	36.078	15.6146	20.4634	0.205202	-4.62722	24.7133
old MSCs	mmu-miR-582-5p-002566	Target	Undetermined	0.0295663	40	19.5366	20.4634	0.205202
old MSCs	mmu-miR-590-5p-001984	Target	38.9389	0.239837	38.9389	18.4755	20.4634	0.205202	-1.76632	3.40184
old MSCs	mmu-miR-598-002476	Target	36.8838	0.346879	36.8838	16.4204	20.4634	0.205202	-3.82144	14.1373
old MSCs	rno-miR-598-5p-002053	Target	Undetermined	-0.0014385	40	19.5366	20.4634	0.205202
old MSCs	mmu-miR-615-3p-001960	Target	Undetermined	0.0254326	40	19.5366	20.4634	0.205202
old MSCs	mmu-miR-615-5p-002353	Target	Undetermined	0.0185667	40	19.5366	20.4634	0.205202
old MSCs	mmu-miR-654-3p-002239	Target	Undetermined	-0.00167912	40	19.5366	20.4634	0.205202
old MSCs	mmu-miR-654-5p-002522	Target	Undetermined	0.00187683	40	19.5366	20.4634	0.205202
old MSCs	mmu-miR-665-002607	Target	38.0345	0.296617	38.0345	17.5711	20.4634	0.205202	-2.67073	6.36752
old MSCs	mmu-miR-666-5p-001952	Target	Undetermined	0.0584143	40	19.5366	20.4634	0.205202
old MSCs	mmu-miR-669a-001683	Target	30.5002	1.36278	30.5002	10.0368	20.4634	0.205202	-2.81752	7.04949
old MSCs	mmu-miR-671-3p-002322	Target	28.7748	2.94343	28.7748	8.31138	20.4634	0.205202	-0.842264	1.79286
old MSCs	mmu-miR-672-002327	Target	33.6032	0.407274	33.6032	13.1398	20.4634	0.205202	-7.10202	137.379
old MSCs	rno-miR-673-002054	Target	Undetermined	0.0103366	40	19.5366	20.4634	0.205202
old MSCs	mmu-miR-674-002021	Target	30.1162	0.897241	30.1162	9.65282	20.4634	0.205202	-1.4726	2.77522
old MSCs	mmu-miR-708-002341	Target	34.1444	0.831901	34.1444	13.681	20.4634	0.205202	-5.42879	43.0752
old MSCs	mmu-miR-741-002457	Target	Undetermined	0.0227353	40	19.5366	20.4634	0.205202
old MSCs	mmu-miR-742-002038	Target	Undetermined	-0.00323313	40	19.5366	20.4634	0.205202
old MSCs	rno-miR-742-002055	Target	Undetermined	-0.00739253	40	19.5366	20.4634	0.205202
old MSCs	mmu-miR-743b-3p-002471	Target	Undetermined	0.00308967	40	19.5366	20.4634	0.205202
old MSCs	mmu-miR-743b-5p-002470	Target	Undetermined	0.0271088	40	19.5366	20.4634	0.205202
old MSCs	mmu-miR-743a-002469	Target	Undetermined	0.022917	40	19.5366	20.4634	0.205202
old MSCs	rno-miR-743b-002068	Target	Undetermined	0.00660521	40	19.5366	20.4634	0.205202
old MSCs	mmu-miR-744-002324	Target	26.9662	2.92214	26.9662	6.50281	20.4634	0.205202	-0.411051	1.32965
old MSCs	rno-miR-758-001990	Target	36.7957	0.305302	36.7957	16.3323	20.4634	0.205202	-3.90954	15.0276
old MSCs	rno-miR-760-5p-002057	Target	Undetermined	0.0023779	40	19.5366	20.4634	0.205202
old MSCs	mmu-miR-770-3p-002027	Target	39.0572	0.238976	39.0572	18.5938	20.4634	0.205202	-1.64804	3.13407
old MSCs	mmu-miR-802-002029	Target	Undetermined	0.00498247	40	19.5366	20.4634	0.205202
old MSCs	mmu-miR-871-002354	Target	Undetermined	0.000875592	40	19.5366	20.4634	0.205202
old MSCs	rno-miR-871-002069	Target	Undetermined	0.0110558	40	19.5366	20.4634	0.205202
old MSCs	mmu-miR-872-002264	Target	27.9707	3.62154	27.9707	7.50733	20.4634	0.205202	-1.31499	2.48801
old MSCs	mmu-miR-873-002356	Target	36.3165	0.450176	36.3165	15.8531	20.4634	0.205202	-4.38873	20.9478
old MSCs	mmu-miR-874-002268	Target	Undetermined	-0.000724018	40	19.5366	20.4634	0.205202
old MSCs	mmu-miR-875-3p-002547	Target	Undetermined	0.0185446	40	19.5366	20.4634	0.205202
old MSCs	mmu-miR-876-3p-002464	Target	Undetermined	0.00203955	40	19.5366	20.4634	0.205202
old MSCs	mmu-miR-876-5p-002463	Target	Undetermined	0.0107541	40	19.5366	20.4634	0.205202
old MSCs	rno-miR-878-002070	Target	Undetermined	0.0219725	40	19.5366	20.4634	0.205202
old MSCs	mmu-miR-878-5p-002540	Target	Undetermined	-0.000296593	40	19.5366	20.4634	0.205202
old MSCs	mmu-miR-879-002472	Target	Undetermined	0.00652909	40	19.5366	20.4634	0.205202
old MSCs	mmu-miR-881-002609	Target	Undetermined	0.00310111	40	19.5366	20.4634	0.205202
old MSCs	rno-miR-881-002072	Target	Undetermined	0.00815517	40	19.5366	20.4634	0.205202
old MSCs	mmu-miR-883a-3p-002461	Target	Undetermined	0.00680071	40	19.5366	20.4634	0.205202
old MSCs	mmu-miR-883b-3p-002565	Target	Undetermined	0.000288308	40	19.5366	20.4634	0.205202
old MSCs	mmu-miR-883a-5p-002611	Target	Undetermined	-0.00224179	40	19.5366	20.4634	0.205202
old MSCs	mmu-miR-125b-3p-002378	Target	28.7435	1.84969	28.7435	8.28008	20.4634	0.205202	-11.9617	3988.76
old MSCs	mmu-miR-143-002249	Target	25.6277	2.96594	25.6277	5.16431	20.4634	0.205202	-15.0775	34576.3
old MSCs	rno-miR-219-1-3p-002077	Target	Undetermined	0.0035165	40	19.5366	20.4634	0.205202
old MSCs	rno-miR-219-2-3p-002390	Target	Undetermined	0.00347921	40	19.5366	20.4634	0.205202
old MSCs	rno-miR-224-000599	Target	27.943	2.15635	27.943	7.47958	20.4634	0.205202	-2.5273	5.76491
old MSCs	mmu-miR-324-3p-002509	Target	29.0906	1.24458	29.0906	8.62726	20.4634	0.205202	-0.531889	1.44582
old MSCs	mmu-miR-351-001067	Target	Undetermined	0.0342766	40	19.5366	20.4634	0.205202	5.01685	0.0308872
old MSCs	rno-miR-381-001322	Target	29.5866	1.73484	29.5866	9.12324	20.4634	0.205202	-0.722012	1.64948
old MSCs	rno-miR-409-5p-001317	Target	Undetermined	-0.00117031	40	19.5366	20.4634	0.205202
old MSCs	rno-miR-450a-001345	Target	Undetermined	0.00812197	40	19.5366	20.4634	0.205202	3.79962	0.0718127
old MSCs	mmu-miR-452-001032	Target	Undetermined	0.0381423	40	19.5366	20.4634	0.205202
old MSCs	mmu-miR-464-001081	Target	Undetermined	0.00485075	40	19.5366	20.4634	0.205202
old MSCs	mmu-miR-467b-001671	Target	31.0619	0.798177	31.0619	10.5985	20.4634	0.205202	1.67875	0.312352
old MSCs	mmu-miR-468-001085	Target	Undetermined	0.0122795	40	19.5366	20.4634	0.205202
old MSCs	mmu-miR-469-001086	Target	Undetermined	-0.00658673	40	19.5366	20.4634	0.205202
old MSCs	mmu-miR-488-001659	Target	Undetermined	-0.00126684	40	19.5366	20.4634	0.205202
old MSCs	mmu-miR-490-001037	Target	Undetermined	0.000738919	40	19.5366	20.4634	0.205202
old MSCs	mmu-miR-496-001953	Target	35.9139	0.466191	35.9139	15.4505	20.4634	0.205202	-4.79127	27.6895
old MSCs	rno-miR-505-001316	Target	Undetermined	-0.0072223	40	19.5366	20.4634	0.205202
old MSCs	mmu-miR-546-001312	Target	Undetermined	0.0028761	40	19.5366	20.4634	0.205202
old MSCs	mmu-miR-547-002564	Target	Undetermined	0.00285983	40	19.5366	20.4634	0.205202
old MSCs	mmu-miR-652-002352	Target	29.3601	1.74854	29.3601	8.89668	20.4634	0.205202	2.73064	0.150659
old MSCs	mmu-miR-667-001949	Target	28.7997	1.2587	28.7997	8.33632	20.4634	0.205202	-4.12964	17.5043
old MSCs	mmu-miR-668-001947	Target	Undetermined	0.017124	40	19.5366	20.4634	0.205202
old MSCs	mmu-miR-670-002020	Target	Undetermined	-0.00143218	40	19.5366	20.4634	0.205202
old MSCs	mmu-miR-675-3p-001941	Target	Undetermined	0.0110263	40	19.5366	20.4634	0.205202
old MSCs	mmu-miR-675-5p-001940	Target	Undetermined	0.00290093	40	19.5366	20.4634	0.205202
old MSCs	mmu-miR-676-001959	Target	31.6457	0.854647	31.6457	11.1824	20.4634	0.205202	-0.61114	1.52747
old MSCs	mmu-miR-677-001660	Target	Undetermined	0.0269782	40	19.5366	20.4634	0.205202	0.84882	0.555239
old MSCs	mmu-miR-679-001662	Target	Undetermined	0.0177485	40	19.5366	20.4634	0.205202
old MSCs	mmu-miR-680-001664	Target	Undetermined	0.0407891	40	19.5366	20.4634	0.205202	3.40966	0.0940998
old MSCs	mmu-miR-682-001666	Target	32.1578	0.845835	32.1578	11.6944	20.4634	0.205202	-4.82756	28.3948
old MSCs	mmu-miR-683-001668	Target	Undetermined	0.00897747	40	19.5366	20.4634	0.205202
old MSCs	mmu-miR-684-001669	Target	35.9996	0.870289	35.9996	15.5362	20.4634	0.205202	-4.7056	26.0932
old MSCs	mmu-miR-685-001670	Target	26.7655	2.2515	26.7655	6.3021	20.4634	0.205202	-4.19628	18.3318
old MSCs	mmu-miR-686-001672	Target	Undetermined	0.0032829	40	19.5366	20.4634	0.205202
old MSCs	mmu-miR-687-001674	Target	Undetermined	0.0299013	40	19.5366	20.4634	0.205202
old MSCs	mmu-let-7a-000377	Target	29.7537	0.711082	29.7537	9.29031	20.4634	0.205202	1.6175	0.325899
old MSCs	mmu-let-7f-000382	Target	Undetermined	0.0428185	40	19.5366	20.4634	0.205202	9.32818	0.00155574
old MSCs	mmu-miR-106b-000442	Target	26.6707	3.07502	26.6707	6.20735	20.4634	0.205202	1.33182	0.397267
old MSCs	mmu-miR-155-002571	Target	24.7992	3.38586	24.7992	4.33576	20.4634	0.205202	0.35825	0.780111
old MSCs	mmu-miR-17-002308	Target	22.337	2.32874	22.337	1.87359	20.4634	0.205202	1.24279	0.422554
old MSCs	mmu-miR-23a-000399	Target	32.8273	0.382967	32.8273	12.364	20.4634	0.205202	-7.87785	235.217
old MSCs	mmu-miR-29a-002112	Target	20.9062	3.5768	20.9062	0.442816	20.4634	0.205202	-3.69743	12.9729
old MSCs	mmu-miR-30a-000417	Target	25.2135	2.9899	25.2135	4.75008	20.4634	0.205202	-0.100784	1.07236
old MSCs	mmu-miR-30e-002223	Target	26.4101	3.53728	26.4101	5.94669	20.4634	0.205202	0.563948	0.676449
old MSCs	mmu-miR-31-000185	Target	22.118	3.10781	22.118	1.65466	20.4634	0.205202	-5.54841	46.7991
old MSCs	mmu-miR-34b-3p-002618	Target	24.2132	3.75032	24.2132	3.74979	20.4634	0.205202	-8.05149	265.302
old MSCs	mmu-miR-92a-000430	Target	22.5882	3.93335	22.5882	2.12485	20.4634	0.205202	2.28306	0.205462
old MSCs	rno-miR-190b-002048	Target	35.0067	1.21005	35.0067	14.5433	20.4634	0.205202	18.179	3.36953e-06
old MSCs	mmu-miR-129-5p-000590	Target	34.2282	0.458281	34.2282	13.7648	20.4634	0.205202	-6.47703	89.0801
old MSCs	mmu-miR-187-001193	Target	Undetermined	0.0166326	40	19.5366	20.4634	0.205202
old MSCs	mmu-miR-188-3p-002106	Target	Undetermined	0.00543261	40	19.5366	20.4634	0.205202
old MSCs	mmu-miR-106a-002459	Target	22.0558	2.68823	22.0558	1.5924	20.4634	0.205202	0.790106	0.578302
old MSCs	mmu-miR-188-5p-002320	Target	27.466	2.38214	27.466	7.00258	20.4634	0.205202	-0.461351	1.37683
old MSCs	mmu-miR-302b-000531	Target	Undetermined	0.0422261	40	19.5366	20.4634	0.205202
old MSCs	mmu-miR-322-001076	Target	30.3057	1.44117	30.3057	9.84229	20.4634	0.205202	3.17274	0.110894
old MSCs	hsa-miR-136#-002100	Target	Undetermined	0.0355217	40	19.781	20.219	0.138784
old MSCs	hsa-miR-30c-1#-002108	Target	Undetermined	0.00345573	40	19.781	20.219	0.138784
old MSCs	hsa-miR-30c-2#-002110	Target	Undetermined	0.0581238	40	19.781	20.219	0.138784
old MSCs	hsa-miR-148a#-002134	Target	Undetermined	0.00355861	40	19.781	20.219	0.138784
old MSCs	hsa-miR-33a#-002136	Target	37.4494	0.320707	37.4494	17.2304	20.219	0.138784	-2.76335	6.7897
old MSCs	hsa-miR-93#-002139	Target	26.907	4.42233	26.907	6.688	20.219	0.138784	1.31859	0.400927
old MSCs	hsa-miR-29b-2#-002166	Target	36.2039	0.465528	36.2039	15.985	20.219	0.138784	-4.50171	22.6542
old MSCs	hsa-let-7i#-002172	Target	35.919	0.794662	35.919	15.7001	20.219	0.138784	-0.98753	1.98279
old MSCs	hsa-miR-15b#-002173	Target	Undetermined	0.186362	40	19.781	20.219	0.138784
old MSCs	hsa-miR-27b#-002174	Target	30.8607	1.6383	30.8607	10.6417	20.219	0.138784	-7.56347	189.161
old MSCs	Mamm U6-001973	Endogenous Control	20.5893	2.89559	20.219		20.219	0.138784
old MSCs	Mamm U6-001973	Endogenous Control	20.0329	3.36778	20.219		20.219	0.138784
old MSCs	hsa-miR-935-002178	Target	Undetermined	0.0104443	40	19.781	20.219	0.138784
old MSCs	hsa-miR-99b#-002196	Target	30.9883	1.86124	30.9883	10.7693	20.219	0.138784	-8.04102	263.384
old MSCs	hsa-miR-124#-002197	Target	Undetermined	0.0112159	40	19.781	20.219	0.138784
old MSCs	hsa-miR-127-5p-002229	Target	Undetermined	-8.73208e-05	40	19.781	20.219	0.138784
old MSCs	hsa-miR-9#-002231	Target	32.6375	1.46174	32.6375	12.4185	20.219	0.138784	-8.06815	268.382
old MSCs	hsa-miR-140-3p-002234	Target	28.5226	2.24757	28.5226	8.30362	20.219	0.138784	-1.17742	2.26171
old MSCs	hsa-miR-411#-002238	Target	32.1604	1.30297	32.1604	11.9414	20.219	0.138784	-8.54523	373.569
old MSCs	hsa-miR-149-002255	Target	24.7583	3.41874	24.7583	4.53931	20.219	0.138784	-3.79314	13.8628
old MSCs	hsa-miR-378-000567	Target	28.8624	4.56512	28.8624	8.64343	20.219	0.138784	-0.0870304	1.06218
old MSCs	hsa-miR-200a#-001011	Target	Undetermined	0.0168661	40	19.781	20.219	0.138784
old MSCs	mmu-miR-10b-001181	Target	30.901	2.86097	30.901	10.682	20.219	0.138784	-9.80467	894.332
old MSCs	hsa-miR-340-000550	Target	29.7498	4.08823	29.7498	9.53081	20.219	0.138784	0.327955	0.796665
old MSCs	hsa-miR-338-000548	Target	Undetermined	-0.00194722	40	19.781	20.219	0.138784
old MSCs	hsa-miR-324-3p-000579	Target	27.8244	1.51898	27.8244	7.6054	20.219	0.138784	-1.27365	2.41773
old MSCs	hsa-miR-30e-3p-000422	Target	23.2308	5.60498	23.2308	3.01178	20.219	0.138784	-2.86763	7.29864
old MSCs	hsa-miR-30a-3p-000416	Target	24.2981	5.60913	24.2981	4.07912	20.219	0.138784	-3.05782	8.32715
old MSCs	hsa-miR-223-000526	Target	25.219	4.21884	25.219	4.99999	20.219	0.138784	5.467	0.0226084
old MSCs	hsa-miR-22-000398	Target	28.558	1.3895	28.558	8.33901	20.219	0.138784	-12.1477	4537.42
old MSCs	hsa-miR-214-000517	Target	21.9073	4.73757	21.9073	1.6883	20.219	0.138784	-9.89046	949.128
old MSCs	hsa-miR-213-000516	Target	32.263	0.906242	32.263	12.044	20.219	0.138784	0.0485497	0.966908
old MSCs	hsa-miR-200c-000505	Target	29.9038	1.78751	29.9038	9.68488	20.219	0.138784	0.467325	0.723304
old MSCs	hsa-miR-143-000466	Target	13.7609	1.62395	13.7609	-6.45806	20.219	0.138784	-0.388232	1.30879
old MSCs	Mamm U6-001973	Endogenous Control	19.9812	3.3913	20.219		20.219	0.138784
old MSCs	Mamm U6-001973	Endogenous Control	20.2725	3.00046	20.219		20.219	0.138784
old MSCs	hsa-miR-136-000592	Target	37.3228	0.515306	37.3228	17.1039	20.219	0.138784	-3.38282	10.4311
old MSCs	hsa-miR-299-5p-000600	Target	Undetermined	0.0581054	40	19.781	20.219	0.138784
old MSCs	hsa-miR-412-001023	Target	38.0723	0.278075	38.0723	17.8533	20.219	0.138784	-2.63335	6.20467
old MSCs	hsa-miR-425-001104	Target	34.0593	0.55992	34.0593	13.8404	20.219	0.138784	0.838287	0.559307
old MSCs	mmu-miR-295#-002596	Target	Undetermined	0.0118791	40	19.781	20.219	0.138784
old MSCs	rno-miR-504-007334	Target	Undetermined	-2.05636e-05	40	19.781	20.219	0.138784
old MSCs	mmu-miR-1224-240985_mat	Target	Undetermined	0.00777346	40	19.781	20.219	0.138784
old MSCs	hsa-miR-363#-001283	Target	Undetermined	0.0144148	40	19.781	20.219	0.138784
old MSCs	mmu-miR-217-001133	Target	Undetermined	0.0139309	40	19.781	20.219	0.138784
old MSCs	mmu-miR-291-3p-001135	Target	Undetermined	0.00901949	40	19.781	20.219	0.138784
old MSCs	mmu-miR-291-5p-001202	Target	Undetermined	0.0123803	40	19.781	20.219	0.138784
old MSCs	mmu-miR-292-3p-001054	Target	Undetermined	0.0112705	40	19.781	20.219	0.138784
old MSCs	mmu-miR-292-5p-001055	Target	Undetermined	-0.00354284	40	19.781	20.219	0.138784
old MSCs	mmu-miR-300-000191	Target	Undetermined	0.00118786	40	19.781	20.219	0.138784
old MSCs	mmu-miR-322-001059	Target	Undetermined	0.0160409	40	19.781	20.219	0.138784	8.83113	0.00219565
old MSCs	mmu-miR-325-001060	Target	Undetermined	-0.0103296	40	19.781	20.219	0.138784
old MSCs	mmu-miR-326-001061	Target	Undetermined	0.0376128	40	19.781	20.219	0.138784	-0.160461	1.11764
old MSCs	mmu-miR-330-001062	Target	Undetermined	0.023559	40	19.781	20.219	0.138784
old MSCs	mmu-miR-337-000193	Target	30.0988	4.14521	30.0988	9.87983	20.219	0.138784	-10.6068	1559.47
old MSCs	mmu-miR-345-001137	Target	30.7064	2.65557	30.7064	10.4874	20.219	0.138784	-2.74793	6.71752
old MSCs	mmu-miR-370-001068	Target	Undetermined	0.0159487	40	19.781	20.219	0.138784
old MSCs	mmu-miR-433-5p-001078	Target	Undetermined	-0.00738791	40	19.781	20.219	0.138784
old MSCs	rno-miR-513-241072_mat	Target	Undetermined	0.0119332	40	19.781	20.219	0.138784
old MSCs	hsa-miR-200b-001800	Target	Undetermined	-0.00419915	40	19.781	20.219	0.138784	8.6184	0.0025445
old MSCs	mmu-miR-483-001291	Target	Undetermined	0.017969	40	19.781	20.219	0.138784
old MSCs	mmu-miR-494-001293	Target	33.0858	1.17132	33.0858	12.8668	20.219	0.138784	-7.61985	196.7
old MSCs	mmu-miR-302b#-001307	Target	Undetermined	-0.00434622	40	19.781	20.219	0.138784
old MSCs	mmu-miR-374-5p-001319	Target	28.805	0.852471	28.805	8.58599	20.219	0.138784	1.60222	0.329369
old MSCs	mmu-miR-695-001627	Target	Undetermined	0.0104777	40	19.781	20.219	0.138784
old MSCs	mmu-miR-696-001628	Target	30.9077	0.607536	30.9077	10.6887	20.219	0.138784	-9.79795	890.176
old MSCs	mmu-miR-720-001629	Target	20.4863	4.48683	20.4863	0.267347	20.219	0.138784	-1.6186	3.07077
old MSCs	mmu-miR-698-001632	Target	36.5189	0.380713	36.5189	16.3	20.219	0.138784	-4.18672	18.2107
old MSCs	mmu-miR-700-001634	Target	29.0288	1.54524	29.0288	8.80983	20.219	0.138784	-4.34077	20.2629
old MSCs	mmu-miR-701-001635	Target	Undetermined	-0.00744629	40	19.781	20.219	0.138784
old MSCs	mmu-miR-702-001636	Target	37.5881	0.282434	37.5881	17.3691	20.219	0.138784	-3.11758	8.67929
old MSCs	mmu-miR-133a#-001637	Target	Undetermined	0.0486593	40	19.781	20.219	0.138784
old MSCs	mmu-miR-706-001641	Target	27.8038	2.60041	27.8038	7.58481	20.219	0.138784	-1.61704	3.06744
old MSCs	mmu-miR-710-001645	Target	Undetermined	0.0352601	40	19.781	20.219	0.138784
old MSCs	mmu-miR-711-001646	Target	Undetermined	0.00264984	40	19.781	20.219	0.138784
old MSCs	mmu-miR-713-001648	Target	Undetermined	0.00695562	40	19.781	20.219	0.138784
old MSCs	mmu-miR-715-001649	Target	Undetermined	0.0538297	40	19.781	20.219	0.138784
old MSCs	mmu-miR-717-001652	Target	Undetermined	0.0122406	40	19.781	20.219	0.138784
old MSCs	mmu-miR-718-001656	Target	Undetermined	0.025849	40	19.781	20.219	0.138784
old MSCs	mmu-miR-721-001657	Target	Undetermined	0.0429871	40	19.781	20.219	0.138784
old MSCs	mmu-miR-690-001677	Target	23.2163	3.52311	23.2163	2.99738	20.219	0.138784	-4.65821	25.25
old MSCs	mmu-miR-691-001678	Target	Undetermined	0.0221068	40	19.781	20.219	0.138784
old MSCs	snoRNA135-001230	Target	23.5591	4.30345	23.5591	3.34015	20.219	0.138784	0.470146	0.721891
old MSCs	mmu-miR-692-001679	Target	30.792	0.522586	30.792	10.5731	20.219	0.138784	-9.91361	964.483
old MSCs	mmu-miR-693-001680	Target	Undetermined	0.0038169	40	19.781	20.219	0.138784
old MSCs	mmu-miR-694-001681	Target	31.118	1.08407	31.118	10.899	20.219	0.138784	-0.416884	1.33504
old MSCs	mmu-miR-467b-001684	Target	29.755	2.47332	29.755	9.53604	20.219	0.138784	-0.833099	1.78151
old MSCs	rno-miR-664-001323	Target	27.3779	4.13191	27.3779	7.15891	20.219	0.138784	0.630772	0.645831
old MSCs	rno-miR-20b-001326	Target	Undetermined	0.030951	40	19.781	20.219	0.138784	11.781	0.00028417
old MSCs	rno-miR-20a#-001336	Target	Undetermined	0.00540182	40	19.781	20.219	0.138784
old MSCs	rno-miR-350-001337	Target	28.2194	2.92775	28.2194	8.00044	20.219	0.138784	-9.2249	598.372
old MSCs	rno-miR-489-001353	Target	31.8673	0.672484	31.8673	11.6484	20.219	0.138784	-0.998452	1.99786
old MSCs	rno-miR-382#-001354	Target	Undetermined	0.0392649	40	19.781	20.219	0.138784
old MSCs	rno-miR-29c#-001818	Target	37.5745	0.468415	37.5745	17.3555	20.219	0.138784	-3.13115	8.76135
old MSCs	hsa-miR-26b#-002444	Target	38.4601	0.322321	38.4601	18.2412	20.219	0.138784	1.88346	0.271032
old MSCs	hsa-miR-27a#-002445	Target	27.3121	3.28294	27.3121	7.09311	20.219	0.138784	-4.84851	28.8102
old MSCs	hsa-miR-28-3p-002446	Target	Undetermined	0.0500966	40	19.781	20.219	0.138784
old MSCs	hsa-miR-29a#-002447	Target	29.1576	3.59896	29.1576	8.93865	20.219	0.138784	-11.548	2994.34
old MSCs	mmu-miR-488#-002014	Target	Undetermined	8.07941e-05	40	19.781	20.219	0.138784
old MSCs	mmu-miR-758-002025	Target	Undetermined	0.00554299	40	19.781	20.219	0.138784
old MSCs	mmu-miR-762-002028	Target	Undetermined	0.0105105	40	19.781	20.219	0.138784
old MSCs	mmu-miR-761-002030	Target	Undetermined	0.00600466	40	19.781	20.219	0.138784
old MSCs	mmu-miR-764-3p-002032	Target	Undetermined	0.000521302	40	19.781	20.219	0.138784
old MSCs	mmu-miR-763-002033	Target	32.9838	0.892244	32.9838	12.7649	20.219	0.138784	-7.7218	211.102
old MSCs	mmu-miR-759-002034	Target	Undetermined	0.00863883	40	19.781	20.219	0.138784
old MSCs	mmu-miR-693-3p-002036	Target	Undetermined	0.00190765	40	19.781	20.219	0.138784
old MSCs	hsa-miR-23a#-002439	Target	33.9478	1.2905	33.9478	13.7288	20.219	0.138784	-6.75788	108.225
old MSCs	mmu-miR-374#-002043	Target	Undetermined	0.0315036	40	19.781	20.219	0.138784
old MSCs	mmu-miR-804-002044	Target	Undetermined	0.0120338	40	19.781	20.219	0.138784
old MSCs	mmu-miR-805-002045	Target	24.2201	4.57354	24.2201	4.00111	20.219	0.138784	-1.9231	3.79237
old MSCs	mmu-miR-666-3p-002448	Target	Undetermined	0.00661421	40	19.781	20.219	0.138784
old MSCs	mmu-miR-673-3p-002449	Target	Undetermined	0.0509141	40	19.781	20.219	0.138784
old MSCs	mmu-miR-376b#-002451	Target	30.0814	3.6493	30.0814	9.86242	20.219	0.138784	-10.6243	1578.41
old MSCs	mmu-miR-146b#-002453	Target	Undetermined	0.013387	40	19.781	20.219	0.138784
old MSCs	mmu-miR-742#-002458	Target	Undetermined	0.00107521	40	19.781	20.219	0.138784
old MSCs	mmu-miR-130b#-002460	Target	30.4869	1.80797	30.4869	10.268	20.219	0.138784	3.14071	0.113384
old MSCs	mmu-miR-879#-002473	Target	33.6496	1.2725	33.6496	13.4307	20.219	0.138784	-7.05602	133.068
old MSCs	mmu-miR-881#-002475	Target	25.4286	1.2365	25.4286	5.20961	20.219	0.138784	0.133148	0.91184
old MSCs	mmu-miR-196a#-002477	Target	23.0404	1.53021	23.0404	2.82146	20.219	0.138784	0.463932	0.725008
old MSCs	mmu-let-7a#-002478	Target	30.3669	2.39086	30.3669	10.1479	20.219	0.138784	-10.3387	1295.01
old MSCs	mmu-let-7c-1#-002479	Target	30.4802	4.04728	30.4802	10.2612	20.219	0.138784	-3.02729	8.15278
old MSCs	mmu-miR-327-002481	Target	Undetermined	0.0126486	40	19.781	20.219	0.138784
old MSCs	mmu-miR-376a#-002482	Target	35.2618	0.623502	35.2618	15.0428	20.219	0.138784	-5.44383	43.5268
old MSCs	mmu-miR-343-002483	Target	Undetermined	0.00458202	40	19.781	20.219	0.138784
old MSCs	mmu-miR-16#-002489	Target	31.5037	2.75082	31.5037	11.2847	20.219	0.138784	-1.06381	2.09045
old MSCs	mmu-miR-18a#-002490	Target	30.1795	2.0028	30.1795	9.96053	20.219	0.138784	-0.467689	1.38289
old MSCs	mmu-miR-20a#-002491	Target	35.1998	0.39988	35.1998	14.9808	20.219	0.138784	5.56863	0.0210706
old MSCs	mmu-miR-24-2#-002494	Target	26.8704	2.61847	26.8704	6.65142	20.219	0.138784	-5.18499	36.3778
old MSCs	mmu-miR-31#-002495	Target	26.0181	3.25037	26.0181	5.79911	20.219	0.138784	-6.6216	98.4689
old MSCs	mmu-miR-92a#-002496	Target	Undetermined	0.0126513	40	19.781	20.219	0.138784	6.61307	0.0102157
old MSCs	snoRNA202-001232	Target	20.1185	5.529	20.1185	-0.1005	20.219	0.138784	1.02596	0.491084
old MSCs	mmu-miR-29b#-002497	Target	26.1438	4.53766	26.1438	5.9248	20.219	0.138784	-1.07253	2.10312
old MSCs	mmu-miR-30b#-002498	Target	Undetermined	-0.00258571	40	19.781	20.219	0.138784
old MSCs	mmu-miR-322#-002506	Target	39.1743	0.218203	39.1743	18.9553	20.219	0.138784	6.81571	0.00887702
old MSCs	mmu-miR-101a#-002507	Target	Undetermined	-0.00815904	40	19.781	20.219	0.138784
old MSCs	mmu-miR-125b#-002508	Target	35.45	0.724318	35.45	15.231	20.219	0.138784	-0.694115	1.61789
old MSCs	mmu-miR-136#-002512	Target	Undetermined	0.0262293	40	19.781	20.219	0.138784
old MSCs	mmu-miR-141#-002513	Target	Undetermined	0.0385131	40	19.781	20.219	0.138784
old MSCs	mmu-miR-145#-002514	Target	Undetermined	0.015241	40	19.781	20.219	0.138784
old MSCs	mmu-miR-376c#-002523	Target	Undetermined	0.000848055	40	19.781	20.219	0.138784
old MSCs	mmu-miR-20b#-002524	Target	Undetermined	0.0219513	40	19.781	20.219	0.138784
old MSCs	mmu-miR-450a-3p-002525	Target	Undetermined	0.00974417	40	19.781	20.219	0.138784
old MSCs	mmu-miR-101b-002531	Target	32.2522	1.66079	32.2522	12.0332	20.219	0.138784	1.17152	0.443953
old MSCs	mmu-miR-291b-3p-002538	Target	Undetermined	0.0203921	40	19.781	20.219	0.138784
old MSCs	mmu-miR-878-3p-002541	Target	31.3608	0.983909	31.3608	11.1418	20.219	0.138784	-2.60641	6.08988
old MSCs	mmu-miR-872#-002542	Target	28.0574	3.89812	28.0574	7.83845	20.219	0.138784	-1.1993	2.29629
old MSCs	mmu-miR-17#-002543	Target	Undetermined	0.0688972	40	19.781	20.219	0.138784	7.93143	0.0040964
old MSCs	mmu-miR-19a#-002544	Target	Undetermined	0.00285429	40	19.781	20.219	0.138784
old MSCs	mmu-miR-28#-002545	Target	29.5921	0.762272	29.5921	9.37313	20.219	0.138784	-11.1135	2215.69
old MSCs	mmu-miR-877#-002548	Target	11.5449	1.53981	11.5449	-8.67407	20.219	0.138784	0.366568	0.775626
old MSCs	mmu-miR-212-002551	Target	25.1661	3.90742	25.1661	4.94713	20.219	0.138784	-6.90193	119.588
old MSCs	mmu-miR-138#-002554	Target	Undetermined	0.0346385	40	19.781	20.219	0.138784
old MSCs	mmu-miR-302c#-002557	Target	Undetermined	0.0186098	40	19.781	20.219	0.138784
old MSCs	mmu-miR-483#-002560	Target	Undetermined	0.00721154	40	19.781	20.219	0.138784
old MSCs	mmu-miR-541-002562	Target	30.1967	3.12481	30.1967	9.97776	20.219	0.138784	-10.5089	1457.12
old MSCs	mmu-miR-467e#-002569	Target	Undetermined	0.00755018	40	19.781	20.219	0.138784
old MSCs	mmu-miR-10b#-002572	Target	33.24	0.920188	33.24	13.021	20.219	0.138784	-3.83894	14.3099
old MSCs	mmu-miR-186#-002574	Target	28.8366	4.61253	28.8366	8.61764	20.219	0.138784	-3.38063	10.4153
old MSCs	mmu-miR-412-002575	Target	34.365	0.535619	34.365	14.146	20.219	0.138784	-6.34065	81.0446
old MSCs	mmu-miR-191#-002576	Target	33.081	2.39593	33.081	12.862	20.219	0.138784	-7.62468	197.359
old MSCs	mmu-miR-193#-002577	Target	25.9253	3.88893	25.9253	5.70638	20.219	0.138784	-5.3072	39.5938
old MSCs	mmu-miR-203#-002580	Target	Undetermined	0.0149641	40	19.781	20.219	0.138784
old MSCs	mmu-miR-463#-002582	Target	32.5247	1.37509	32.5247	12.3058	20.219	0.138784	-1.61546	3.06408
old MSCs	mmu-miR-34c#-002584	Target	30.3467	1.70652	30.3467	10.1277	20.219	0.138784	-10.3589	1313.25
old MSCs	mmu-miR-466a-3p-002586	Target	29.4736	2.40543	29.4736	9.25463	20.219	0.138784	-3.57588	11.9247
old MSCs	mmu-miR-470#-002589	Target	37.4406	0.299758	37.4406	17.2216	20.219	0.138784	1.41801	0.374228
old MSCs	mmu-miR-290-5p-002590	Target	Undetermined	0.0135058	40	19.781	20.219	0.138784
old MSCs	mmu-miR-293#-002594	Target	Undetermined	0.0141532	40	19.781	20.219	0.138784
old MSCs	hsa-miR-455-001280	Target	33.0139	1.46734	33.0139	12.7949	20.219	0.138784	-7.69177	206.754
old MSCs	hsa-miR-493-3p-001282	Target	31.5619	0.469235	31.5619	11.3429	20.219	0.138784	-9.14373	565.635
old MSCs	hsa-miR-376a#-001287	Target	33.2193	1.16915	33.2193	13.0004	20.219	0.138784	-7.48632	179.311
old MSCs	mmu-let-7d#-001178	Target	Undetermined	0.0150562	40	19.781	20.219	0.138784
old MSCs	mmu-miR-543-001298	Target	30.4752	1.35071	30.4752	10.2563	20.219	0.138784	-10.2304	1201.31
old MSCs	mmu-miR-487b-001306	Target	31.1653	1.90901	31.1653	10.9463	20.219	0.138784	-9.54033	744.602
old MSCs	mmu-miR-1933-5p-121133_mat	Target	Undetermined	0.0129365	40	19.781	20.219	0.138784
old MSCs	mmu-miR-449b-001667	Target	Undetermined	0.00431302	40	19.781	20.219	0.138784
old MSCs	mmu-miR-719-001673	Target	Undetermined	0.0314904	40	19.781	20.219	0.138784
old MSCs	mmu-miR-688-001675	Target	Undetermined	0.00513598	40	19.781	20.219	0.138784
old MSCs	U87-001712	Target	25.9883	3.5294	25.9883	5.7693	20.219	0.138784	0.816616	0.567772
old MSCs	mmu-miR-467a-001826	Target	25.5195	1.14075	25.5195	5.30051	20.219	0.138784	-1.01643	2.02291
old MSCs	mmu-miR-485-3p-001943	Target	27.5549	2.98359	27.5549	7.33591	20.219	0.138784	-8.75633	432.431
old MSCs	mmu-miR-673-001954	Target	9.82151	2.49279	9.82151	-10.3975	20.219	0.138784	-0.483808	1.39843
old MSCs	mmu-miR-674#-001956	Target	26.9717	3.75613	26.9717	6.75275	20.219	0.138784	-3.11674	8.67429
old MSCs	mmu-miR-676#-001958	Target	35.4156	0.634575	35.4156	15.1966	20.219	0.138784	-1.63231	3.1001
old MSCs	mmu-miR-712#-001961	Target	Undetermined	0.00697911	40	19.781	20.219	0.138784
old MSCs	hsa-miR-190b-002263	Target	30.1634	4.54449	30.1634	9.94446	20.219	0.138784	-1.23843	2.35942
old MSCs	hsa-miR-183#-002270	Target	35.017	0.44983	35.017	14.798	20.219	0.138784	-5.68864	51.5766
old MSCs	hsa-miR-200c#-002286	Target	Undetermined	0.00383413	40	19.781	20.219	0.138784
old MSCs	hsa-miR-10a#-002288	Target	Undetermined	0.0275449	40	19.781	20.219	0.138784
old MSCs	hsa-miR-214#-002293	Target	26.9936	3.59051	26.9936	6.77459	20.219	0.138784	-13.7121	13419.9
old MSCs	hsa-miR-218-2#-002294	Target	34.7336	1.56678	34.7336	14.5146	20.219	0.138784	-5.97206	62.7725
old MSCs	hsa-miR-22#-002301	Target	31.3308	1.28245	31.3308	11.1119	20.219	0.138784	-9.3748	663.889
old MSCs	hsa-miR-30d#-002305	Target	34.8082	0.391166	34.8082	14.5892	20.219	0.138784	3.32477	0.0998031
old MSCs	hsa-miR-431#-002312	Target	Undetermined	0.00551739	40	19.781	20.219	0.138784
old MSCs	hsa-miR-744#-002325	Target	32.1753	1.91309	32.1753	11.9564	20.219	0.138784	-3.72134	13.1897
old MSCs	hsa-miR-708#-002342	Target	Undetermined	-0.00509274	40	19.781	20.219	0.138784
old MSCs	hsa-miR-106b#-002380	Target	28.581	2.60619	28.581	8.36207	20.219	0.138784	0.126911	0.91579
old MSCs	hsa-let-7b#-002404	Target	Undetermined	0.0574936	40	19.781	20.219	0.138784
old MSCs	hsa-let-7e#-002407	Target	Undetermined	-0.00350893	40	19.781	20.219	0.138784
old MSCs	mmu-miR-450B-3P-002632	Target	34.3571	0.91157	34.3571	14.1381	20.219	0.138784	3.37613	0.0963128
old MSCs	mmu-miR-712-002636	Target	25.4667	4.77286	25.4667	5.24773	20.219	0.138784	-1.54716	2.92241
old MSCs	mmu-miR-465C-5P-002654	Target	32.4889	0.769477	32.4889	12.2699	20.219	0.138784	-1.80696	3.49905
old MSCs	mmu-miR-463-002662	Target	34.3511	1.47931	34.3511	14.1322	20.219	0.138784	-0.697708	1.62193
old MSCs	mmu-miR-880-002665	Target	Undetermined	0.0254089	40	19.781	20.219	0.138784
old MSCs	mmu-miR-883B-5P-002669	Target	Undetermined	-0.00350893	40	19.781	20.219	0.138784
old MSCs	mmu-miR-181A-2#-002687	Target	Undetermined	0.00645649	40	19.781	20.219	0.138784
old MSCs	mmu-miR-466E-5P-002718	Target	32.516	0.337296	32.516	12.2971	20.219	0.138784	-0.665573	1.5862
old MSCs	mmu-miR-669E-002774	Target	Undetermined	-7.93338e-05	40	19.781	20.219	0.138784
old MSCs	mmu-miR-1198-002780	Target	34.0573	0.4878	34.0573	13.8383	20.219	0.138784	-0.0240479	1.01681
old MSCs	mmu-miR-1193-002794	Target	33.745	1.03723	33.745	13.526	20.219	0.138784	-6.96068	124.559
old MSCs	mmu-miR-1192-002806	Target	Undetermined	0.000394166	40	19.781	20.219	0.138784
old MSCs	mmu-miR-669D-002808	Target	35.103	0.488484	35.103	14.884	20.219	0.138784	-5.60266	48.5925
old MSCs	mmu-miR-467H-002809	Target	34.617	0.572987	34.617	14.3981	20.219	0.138784	-6.08862	68.0543
old MSCs	mmu-miR-466J-002817	Target	35.2695	0.446806	35.2695	15.0505	20.219	0.138784	2.51659	0.174756
old MSCs	mmu-miR-1195-002839	Target	Undetermined	0.0577292	40	19.781	20.219	0.138784
old MSCs	mmu-miR-1188-002866	Target	Undetermined	0.132921	40	19.781	20.219	0.138784	23.591	7.91385e-08
old MSCs	mmu-miR-1-2-AS-002882	Target	34.3372	0.891455	34.3372	14.1182	20.219	0.138784	-0.129303	1.09377
old MSCs	mmu-miR-467F-002886	Target	27.1278	1.1937	27.1278	6.90883	20.219	0.138784	-0.558416	1.47265
old MSCs	mmu-miR-669H-5P-002906	Target	Undetermined	0.00170636	40	19.781	20.219	0.138784
old MSCs	rno-miR-880-002666	Target	Undetermined	0.0223909	40	19.781	20.219	0.138784
old MSCs	rno-miR-409-3P-002679	Target	26.1693	3.28672	26.1693	5.95029	20.219	0.138784	-9.57101	760.609
old MSCs	rno-miR-146B-002755	Target	27.385	4.74008	27.385	7.166	20.219	0.138784	1.77977	0.29123
old MSCs	hsa-miR-423-3P-002626	Target	26.6724	2.38939	26.6724	6.45346	20.219	0.138784	-0.723917	1.65166
old MSCs	hsa-miR-151-5P-002642	Target	Undetermined	0.0241194	40	19.781	20.219	0.138784
old MSCs	hsa-miR-338-5P-002658	Target	35.8053	0.408107	35.8053	15.5864	20.219	0.138784	-0.566387	1.48081
old MSCs	hsa-miR-590-3P-002677	Target	Undetermined	-0.00341439	40	19.781	20.219	0.138784
old MSCs	Y1-001727	Target	25.346	2.46454	25.346	5.12699	20.219	0.138784	-7.29995	157.582
old MSCs	hsa-miR-421-002700	Target	23.7999	5.07222	23.7999	3.58089	20.219	0.138784	-2.6598	6.31947
old MSCs	hsa-miR-1197-002810	Target	Undetermined	0.016658	40	19.781	20.219	0.138784
old MSCs	mmu-miR-471-002605	Target	Undetermined	-0.00376031	40	19.781	20.219	0.138784
old MSCs	mmu-miR-770-5p-002608	Target	Undetermined	0.00204602	40	19.781	20.219	0.138784
old MSCs	mmu-miR-882-002610	Target	Undetermined	0.000104934	40	19.781	20.219	0.138784
old MSCs	mmu-miR-299-002612	Target	Undetermined	0.000990152	40	19.781	20.219	0.138784
old MSCs	mmu-miR-300#-002613	Target	Undetermined	0.00110132	40	19.781	20.219	0.138784
old MSCs	mmu-miR-362-5p-002614	Target	29.8676	2.81062	29.8676	9.64867	20.219	0.138784	-3.05413	8.30589
old MSCs	mmu-miR-34b-5p-002617	Target	Undetermined	0.0101469	40	19.781	20.219	0.138784
old MSCs	rno-miR-743a-002056	Target	33.8985	0.504542	33.8985	13.6795	20.219	0.138784	-3.7775	13.7132
old MSCs	rno-miR-148b-5p-002058	Target	32.9876	1.6908	32.9876	12.7686	20.219	0.138784	0.158218	0.896131
old MSCs	rno-miR-7a#-002062	Target	28.5601	1.25989	28.5601	8.34112	20.219	0.138784	0.358902	0.779758
old MSCs	rno-miR-99a#-002073	Target	35.0911	0.513386	35.0911	14.8722	20.219	0.138784	0.225487	0.855306
old MSCs	rno-miR-125b#-002074	Target	37.4466	0.446918	37.4466	17.2277	20.219	0.138784	-3.259	9.57316
old MSCs	rno-miR-135a#-002075	Target	Undetermined	0.0377432	40	19.781	20.219	0.138784
old MSCs	rno-miR-204#-002076	Target	38.7731	0.258729	38.7731	18.5542	20.219	0.138784	-1.9325	3.81716
old MSCs	rno-miR-24-1#-002079	Target	Undetermined	0.00244218	40	19.781	20.219	0.138784
old MSCs	rno-miR-25#-002080	Target	Undetermined	0.0461926	40	19.781	20.219	0.138784
old MSCs	rno-miR-29b-1#-002082	Target	Undetermined	0.0448507	40	19.781	20.219	0.138784
old MSCs	hsa-miR-189-000488	Target	Undetermined	0.0197642	40	19.781	20.219	0.138784
old MSCs	rno-miR-666-241074_mat	Target	Undetermined	0.00743958	40	19.781	20.219	0.138784
old MSCs	rno-miR-547-241078_mat	Target	Undetermined	0.0485789	40	19.781	20.219	0.138784
old MSCs	mmu-miR-2138-241080_mat	Target	23.7626	1.80225	23.7626	3.54362	20.219	0.138784	-5.89254	59.4062
old MSCs	mmu-miR-767-241081_mat	Target	Undetermined	0.007649	40	19.781	20.219	0.138784
old MSCs	mmu-miR-2146-241082_mat	Target	22.0282	2.92267	22.0282	1.80923	20.219	0.138784	-2.55243	5.8662
old MSCs	rno-miR-105-241087_mat	Target	Undetermined	0.0108637	40	19.781	20.219	0.138784
old MSCs	rno-miR-294-241093_mat	Target	Undetermined	0.00652361	40	19.781	20.219	0.138784
old MSCs	mmu-miR-2183-241095_mat	Target	29.6295	1.69386	29.6295	9.41056	20.219	0.138784	-2.78731	6.90339
old MSCs	rno-miR-220-241101_mat	Target	Undetermined	0.0103389	40	19.781	20.219	0.138784
old MSCs	rno-miR-293-241102_mat	Target	Undetermined	0.00278619	40	19.781	20.219	0.138784
old MSCs	rno-miR-632-241110_mat	Target	10.8246	1.93855	10.8246	-9.3944	20.219	0.138784	-1.15294	2.22367
old MSCs	mmu-miR-599-241117_mat	Target	Undetermined	0.0183735	40	19.781	20.219	0.138784
old MSCs	mmu-miR-2182-241119_mat	Target	23.3889	4.55219	23.3889	3.16998	20.219	0.138784	-4.4852	22.3964
old MSCs	mmu-miR-2134-241120_mat	Target	14.6006	5.15527	14.6006	-5.61841	20.219	0.138784	-3.17114	9.00755
old MSCs	rno-miR-653-241125_mat	Target	Undetermined	0.00473946	40	19.781	20.219	0.138784
old MSCs	mmu-miR-2139-241130_mat	Target	Undetermined	-0.00187773	40	19.781	20.219	0.138784
old MSCs	rno-miR-465-241132_mat	Target	Undetermined	0.0194878	40	19.781	20.219	0.138784
old MSCs	mmu-miR-2136-241133_mat	Target	Undetermined	0.00866807	40	19.781	20.219	0.138784
old MSCs	mmu-miR-432-241135_mat	Target	Undetermined	-0.0137246	40	19.781	20.219	0.138784
old MSCs	rno-miR-711-241136_mat	Target	Undetermined	0.00658292	40	19.781	20.219	0.138784
old MSCs	rno-miR-876-241138_mat	Target	Undetermined	0.0177708	40	19.781	20.219	0.138784
old MSCs	mmu-miR-2135-241140_mat	Target	23.4751	2.88227	23.4751	3.25617	20.219	0.138784	-3.23549	9.41847
old MSCs	hsa-miR-671-5p-197646_mat	Target	32.7368	2.80918	32.7368	12.5178	20.219	0.138784	-5.9508	61.8541
old MSCs	hsa-miR-144-002676	Target	Undetermined	0.0349204	40	19.781	20.219	0.138784
old MSCs	mmu-miR-15a#-002488	Target	31.3496	1.01419	31.3496	11.1307	20.219	0.138784	0.169856	0.888931
old MSCs	mmu-miR-503#-002536	Target	32.8987	1.93818	32.8987	12.6797	20.219	0.138784	2.63549	0.16093
old MSCs	mmu-miR-218-1#-002552	Target	36.4742	0.866572	36.4742	16.2552	20.219	0.138784	-4.23145	18.7843
old MSCs	ath-miR159a-000338	Target	Undetermined	0.0090099	40	19.781	20.219	0.138784
old MSCs	mmu-miR-150#-002570	Target	Undetermined	0.0257283	40	19.781	20.219	0.138784	1.45309	0.365237
old MSCs	rno-miR-1#-001351	Target	Undetermined	-0.00135553	40	19.781	20.219	0.138784
old MSCs	hsa-miR-200b#-002274	Target	Undetermined	0.00382268	40	19.781	20.219	0.138784
old MSCs	hsa-miR-653-002292	Target	Undetermined	0.0150765	40	19.781	20.219	0.138784
old MSCs	mmu-miR-1191-002892	Target	33.0874	0.859666	33.0874	12.8685	20.219	0.138784	-3.55491	11.7526
old MSCs	rno-miR-379#-002081	Target	Undetermined	0.0373535	40	19.781	20.219	0.138784
old MSCs	mmu-miR-1904-121162_mat	Target	13.8203	2.08493	13.8203	-6.39869	20.219	0.138784	-1.56883	2.96664
old MSCs	mmu-miR-1941-3p-121130_mat	Target	Undetermined	0.0332106	40	19.781	20.219	0.138784	-0.193115	1.14323
old MSCs	mmu-miR-297a#-002454	Target	31.4082	1.36697	31.4082	11.1892	20.219	0.138784	-0.207824	1.15494
old MSCs	mmu-miR-1957-121163_mat	Target	Undetermined	0.0418118	40	19.781	20.219	0.138784
old MSCs	mmu-miR-704-001639	Target	34.4155	0.458165	34.4155	14.1966	20.219	0.138784	1.27436	0.413407
old MSCs	mmu-miR-1274a-121150_mat	Target	21.3089	4.16232	21.3089	1.0899	20.219	0.138784	-6.90542	119.878
old MSCs	mmu-miR-1306-121155_mat	Target	Undetermined	0.0489766	40	19.781	20.219	0.138784
old MSCs	mmu-miR-1839-3p-121203_mat	Target	28.8187	3.21303	28.8187	8.59969	20.219	0.138784	-2.09138	4.26155
old MSCs	mmu-miR-1839-5p-121135_mat	Target	29.9677	2.25107	29.9677	9.74873	20.219	0.138784	0.47209	0.72092
old MSCs	mmu-miR-1893-121170_mat	Target	Undetermined	0.00838482	40	19.781	20.219	0.138784
old MSCs	mmu-miR-1896-121128_mat	Target	30.5414	1.11168	30.5414	10.3224	20.219	0.138784	5.62117	0.0203169
old MSCs	mmu-miR-1897-3p-121126_mat	Target	Undetermined	0.0552944	40	19.781	20.219	0.138784
old MSCs	mmu-miR-1897-5p-121199_mat	Target	24.4652	2.24534	24.4652	4.24626	20.219	0.138784	-0.282124	1.21598
old MSCs	mmu-miR-1898-121195_mat	Target	Undetermined	0.0181634	40	19.781	20.219	0.138784
old MSCs	mmu-miR-1899-121198_mat	Target	Undetermined	-0.00395986	40	19.781	20.219	0.138784
old MSCs	mmu-miR-1900-121143_mat	Target	Undetermined	0.00794572	40	19.781	20.219	0.138784
old MSCs	mmu-miR-1901-121183_mat	Target	Undetermined	0.0385545	40	19.781	20.219	0.138784
old MSCs	mmu-miR-1902-121197_mat	Target	Undetermined	0.00590169	40	19.781	20.219	0.138784
old MSCs	mmu-miR-1903-121153_mat	Target	Undetermined	0.0117732	40	19.781	20.219	0.138784
old MSCs	mmu-miR-1905-121196_mat	Target	27.7434	0.802988	27.7434	7.52447	20.219	0.138784	-2.73306	6.64864
old MSCs	mmu-miR-1927-121193_mat	Target	Undetermined	0.00679588	40	19.781	20.219	0.138784
old MSCs	mmu-miR-1928-121164_mat	Target	32.6607	3.0209	32.6607	12.4417	20.219	0.138784	-1.56348	2.95566
old MSCs	mmu-miR-1930-121201_mat	Target	29.7635	3.46936	29.7635	9.54452	20.219	0.138784	-2.20086	4.59755
old MSCs	mmu-miR-1931-121168_mat	Target	Undetermined	0.000624359	40	19.781	20.219	0.138784
old MSCs	mmu-miR-1932-121172_mat	Target	Undetermined	-0.00338724	40	19.781	20.219	0.138784	2.08869	0.235094
old MSCs	mmu-miR-1933-3p-121145_mat	Target	Undetermined	-0.0105285	40	19.781	20.219	0.138784
old MSCs	mmu-miR-1934-121185_mat	Target	Undetermined	0.00660366	40	19.781	20.219	0.138784
old MSCs	mmu-miR-1935-121192_mat	Target	Undetermined	0.000584125	40	19.781	20.219	0.138784
old MSCs	mmu-miR-1936-121158_mat	Target	Undetermined	0.00461927	40	19.781	20.219	0.138784
old MSCs	mmu-miR-1938-121194_mat	Target	Undetermined	0.00831169	40	19.781	20.219	0.138784
old MSCs	mmu-miR-1939-121180_mat	Target	33.2398	1.03503	33.2398	13.0209	20.219	0.138784	0.00713348	0.995068
old MSCs	mmu-miR-1940-121187_mat	Target	33.9497	0.719297	33.9497	13.7307	20.219	0.138784	-6.75594	108.079
old MSCs	mmu-miR-1941-5p-121140_mat	Target	34.1216	1.37839	34.1216	13.9027	20.219	0.138784	-6.58401	95.937
old MSCs	mmu-miR-1942-121136_mat	Target	Undetermined	0.0372999	40	19.781	20.219	0.138784
old MSCs	mmu-miR-1944-121189_mat	Target	26.2831	4.69663	26.2831	6.06411	20.219	0.138784	-2.44356	5.43981
old MSCs	mmu-miR-1945-121166_mat	Target	Undetermined	0.00872707	40	19.781	20.219	0.138784
old MSCs	mmu-miR-1947-121156_mat	Target	Undetermined	0.0193552	40	19.781	20.219	0.138784
old MSCs	mmu-miR-1948-121171_mat	Target	Undetermined	6.50883e-05	40	19.781	20.219	0.138784
old MSCs	mmu-miR-1950-121146_mat	Target	Undetermined	-0.00381786	40	19.781	20.219	0.138784
old MSCs	mmu-miR-1951-121165_mat	Target	22.2549	0.683779	22.2549	2.03594	20.219	0.138784	-0.177216	1.1307
old MSCs	mmu-miR-1952-121167_mat	Target	Undetermined	-0.00138783	40	19.781	20.219	0.138784
old MSCs	mmu-miR-1953-121159_mat	Target	Undetermined	-0.00221229	40	19.781	20.219	0.138784
old MSCs	mmu-miR-1954-121137_mat	Target	29.8755	1.81168	29.8755	9.65654	20.219	0.138784	-4.11212	17.293
old MSCs	mmu-miR-1958-121181_mat	Target	Undetermined	0.00280911	40	19.781	20.219	0.138784
old MSCs	mmu-miR-1959-121132_mat	Target	Undetermined	0.0172953	40	19.781	20.219	0.138784	1.92556	0.263239
old MSCs	mmu-miR-1960-121148_mat	Target	Undetermined	0.0152572	40	19.781	20.219	0.138784
old MSCs	mmu-miR-1962-121173_mat	Target	Undetermined	0.025768	40	19.781	20.219	0.138784
old MSCs	mmu-miR-1963-121191_mat	Target	Undetermined	0.00102487	40	19.781	20.219	0.138784
old MSCs	mmu-miR-1964-121138_mat	Target	Undetermined	0.00233185	40	19.781	20.219	0.138784
old MSCs	mmu-miR-1965-121186_mat	Target	Undetermined	0.00298715	40	19.781	20.219	0.138784
old MSCs	mmu-miR-1966-121134_mat	Target	Undetermined	0.00532305	40	19.781	20.219	0.138784
old MSCs	mmu-miR-1967-121151_mat	Target	Undetermined	0.00922739	40	19.781	20.219	0.138784
old MSCs	mmu-miR-1968-121179_mat	Target	Undetermined	-0.00271597	40	19.781	20.219	0.138784
old MSCs	mmu-miR-1969-121131_mat	Target	15.6695	1.0585	15.6695	-4.54949	20.219	0.138784	-1.0458	2.06451
old MSCs	mmu-miR-1970-121202_mat	Target	Undetermined	0.00349182	40	19.781	20.219	0.138784
old MSCs	mmu-miR-1971-121161_mat	Target	28.4143	1.12073	28.4143	8.1953	20.219	0.138784	-3.41291	10.6509
old MSCs	mmu-miR-1981-121200_mat	Target	33.0633	0.859292	33.0633	12.8443	20.219	0.138784	-3.20718	9.23541
old MSCs	mmu-miR-1982.1-121157_mat	Target	31.5775	0.936012	31.5775	11.3585	20.219	0.138784	-2.41843	5.3459
old MSCs	mmu-miR-1982.2-121154_mat	Target	34.0808	0.786047	34.0808	13.8619	20.219	0.138784	-2.16806	4.4942
old MSCs	mmu-miR-669l-121149_mat	Target	Undetermined	0.0162453	40	19.781	20.219	0.138784
old MSCs	mmu-miR-669m-121190_mat	Target	35.5721	0.535039	35.5721	15.3532	20.219	0.138784	-1.54904	2.92623
old MSCs	mmu-miR-669o-121176_mat	Target	34.619	0.7102	34.619	14.4001	20.219	0.138784	0.345127	0.787239
old MSCs	mmu-let-7g#-002492	Target	Undetermined	0.00773898	40	19.781	20.219	0.138784
old MSCs	mmu-miR-466d-5p-002534	Target	Undetermined	0.0363829	40	19.781	20.219	0.138784	2.30576	0.202254
old MSCs	hsa-let-7f-1#-002417	Target	Undetermined	0.0457907	40	19.781	20.219	0.138784
old MSCs	mmu-miR-669C-002646	Target	Undetermined	0.0665658	40	19.781	20.219	0.138784	7.02831	0.00766068
old MSCs	mmu-miR-1186-002825	Target	Undetermined	0.00638026	40	19.781	20.219	0.138784
old MSCs	rno-miR-551B-002760	Target	Undetermined	-0.00102866	40	19.781	20.219	0.138784
old MSCs	mmu-miR-302a#-002615	Target	Undetermined	0.00313315	40	19.781	20.219	0.138784
old MSCs	hsa-miR-154#-000478	Target	34.3202	1.47719	34.3202	14.1012	20.219	0.138784	-6.38545	83.601
old MSCs	mmu-miR-1894-5p-121144_mat	Target	Undetermined	0.0259228	40	19.781	20.219	0.138784
old MSCs	mmu-miR-669n-197143_mat	Target	36.7562	0.31218	36.7562	16.5372	20.219	0.138784	5.76785	0.0183529
old MSCs	mmu-miR-1961-197391_mat	Target	34.6174	0.564196	34.6174	14.3984	20.219	0.138784	-5.29595	39.2862
old MSCs	mmu-miR-1199-240984_mat	Target	Undetermined	0.00817954	40	19.781	20.219	0.138784
old MSCs	mmu-miR-466k-240990_mat	Target	33.6127	0.722563	33.6127	13.3937	20.219	0.138784	0.260517	0.834789
old MSCs	mmu-miR-1894-3p-241002_mat	Target	30.3268	3.2115	30.3268	10.1078	20.219	0.138784	-2.91664	7.55086
old MSCs	mmu-miR-1937c-241011_mat	Target	18.6044	3.84794	18.6044	-1.61454	20.219	0.138784	-2.14075	4.40992
old MSCs	mmu-miR-466g-241015_mat	Target	33.885	0.630785	33.885	13.6661	20.219	0.138784	-6.82059	113.032
old MSCs	mmu-miR-1937b-241023_mat	Target	17.98	4.10088	17.98	-2.23898	20.219	0.138784	-2.02362	4.06604
old MSCs	hsa-miR-196a-241070_mat	Target	22.8521	5.01142	22.8521	2.63312	20.219	0.138784	-0.345953	1.27099
old MSCs	hsa-miR-875-5p-002203	Target	13.245	1.61229	13.245	-6.97397	20.219	0.138784	-2.06758	4.19183
old MSCs	hsa-miR-206-000510	Target	26.2239	5.44875	26.2239	6.00495	20.219	0.138784	-6.28801	78.1408
old MSCs	mmu-miR-290-000187	Target	Undetermined	0.00762981	40	19.781	20.219	0.138784
old MSCs	mmu-miR-707-001642	Target	Undetermined	0.00319153	40	19.781	20.219	0.138784
old MSCs	rno-miR-352-001339	Target	31.4466	0.835948	31.4466	11.2276	20.219	0.138784	0.388771	0.76378
old MSCs	mmu-miR-764-5p-002031	Target	Undetermined	0.00427037	40	19.781	20.219	0.138784
old MSCs	hsa-miR-485-5p-001036	Target	Undetermined	0.00533193	40	19.781	20.219	0.138784
old MSCs	mmu-miR-199b-001131	Target	31.3134	1.77374	31.3134	11.0944	20.219	0.138784	-9.39227	671.977
old MSCs	mmu-miR-34b-001065	Target	32.162	1.50226	32.162	11.943	20.219	0.138784	-8.54368	373.167
old MSCs	mmu-miR-697-001631	Target	Undetermined	0.0343218	40	19.781	20.219	0.138784
old MSCs	rno-miR-7#-001338	Target	27.1992	2.8936	27.1992	6.98024	20.219	0.138784	-0.0430355	1.03028
old MSCs	mmu-miR-501-001356	Target	Undetermined	0.0140969	40	19.781	20.219	0.138784
old MSCs	mmu-miR-592-002017	Target	Undetermined	0.00313607	40	19.781	20.219	0.138784
old MSCs	mmu-miR-21#-002493	Target	32.4089	1.70523	32.4089	12.19	20.219	0.138784	-8.29671	314.454
old MSCs	mmu-miR-466b-3-3p-002500	Target	33.2662	0.747074	33.2662	13.0472	20.219	0.138784	-7.43942	173.576
old MSCs	mmu-miR-294#-002595	Target	Undetermined	0.00470683	40	19.781	20.219	0.138784
old MSCs	mmu-miR-1194-002793	Target	Undetermined	0.00199729	40	19.781	20.219	0.138784
old MSCs	mmu-miR-669G-002813	Target	Undetermined	0.00536102	40	19.781	20.219	0.138784
old MSCs	mmu-miR-1943-121174_mat	Target	33.0878	0.658844	33.0878	12.8688	20.219	0.138784	-7.61786	196.428
old MSCs	mmu-miR-1949-121182_mat	Target	29.0925	3.523	29.0925	8.87352	20.219	0.138784	-1.64626	3.13022
old MSCs	mmu-miR-1956-121129_mat	Target	Undetermined	-0.00458443	40	19.781	20.219	0.138784
old MSCs	mmu-miR-1906-121169_mat	Target	Undetermined	0.0187396	40	19.781	20.219	0.138784
old MSCs	mmu-miR-1946a-121178_mat	Target	Undetermined	0.0074392	40	19.781	20.219	0.138784
