# Supplementary material for: Growth differentiation factor 6 derived from mesenchymal stem/stromal cells reduces age-related functional deterioration in multiple tissues
Source: Aging (Albany NY). 2016 Jun 14;8(6):1259–69. doi: 10.18632/aging.100982 (PMC4931831; doi:10.18632/aging.100982)
Supplement: Supplementary file 4 [file aging-08-1259-s004.xlsx]

## Sheet: Supplementary Table 1
Supplementary Table 3. Expression levels of miR-17 family members in young and old MSCs.
	Young	Old	Fold change
miR-17	1.0635	0.422554	0.397325
miR-18a	6.88773	2.53171	0.367568
miR-19a	0.729646	0.39124	0.536206
miR-19b	1.49164	0.604567	0.405303
miR-20a	0.820251	0.311484	0.379743
miR-20b	1.77954	0.663767	0.372999
miR-106a	1.2074	0.578302	0.478965
miR-106b	0.899713	0.397267	0.441549
miR-25	0.764118	0.440716	0.576765
miR-92a	0.596378	0.205462	0.344516
miR-93	0.885506	0.35847	0.40482
miR-363	0.729921	0.272631	0.373507
