# Supplementary material for: Growth differentiation factor 6 derived from mesenchymal stem/stromal cells reduces age-related functional deterioration in multiple tissues
Source: Aging (Albany NY). 2016 Jun 14;8(6):1259–69. doi: 10.18632/aging.100982 (PMC4931831; doi:10.18632/aging.100982)
Supplement: Supplementary file 5 [file aging-08-1259-s005.xlsx]

## Sheet: 13 candidate factors
	Supplementary Table 4. Relative expression levels of 13 candidate factors.
		Fold change
	Gene symbol	Young	Old	miR-LacZ	miR-17
	Spink4	1	0.698882	0.467684	2.46483
	C1qtnf3	1	0.511907	0.442226	1.78253
	Dpt	1	0.340524	0.478937	1.74105
	Mfap4	1	0.414739	0.476648	1.5708
	Cpa2	1	0.204229	0.292083	0.943805
	Serpini1	1	0.590341	0.397854	1.16133
	Agrp	1	0.330822	0.458801	1.0516
	Clec3b	1	0.305403	0.657732	1.4832
	Ctf1	1	0.219823	0.676883	1.37973
	Gdf6	1	0.47613	0.661148	1.23967
	Saa3	1	0.0132044	0.550192	0.989098
	Reg3a	1	0.467694	0.647031	1.05529
	Frzb	1	0.529327	0.515888	0.788098
